# Supplementary material for: Integration of Multiple-Omics Data to Analyze the Population-Specific Differences for Coronary Artery Disease
Source: Comput Math Methods Med. 2021 Aug 17;2021:7036592. doi: 10.1155/2021/7036592 (PMC8384508; doi:10.1155/2021/7036592)
Supplement: Supplementary Materials — Supplementary Figure 1: Venn diagram of the number of risk genes in the European population and East Asian population. Supplementary Figure 2: Q − Q plot of the gene-based test computed by MAGMA. Supplementary Figure 3: funnel plot of meta-analysis of rs599839 (PSRC1). Supplementary Figure 4: meta-analysis of the association between rs17465637 (MIA3) and CAD. Supplementary Figure 5: meta-analysis of the association between rs4977574 (CDKN2A/B, ANRIL) and CAD. Supplementary Figure 6: meta-analysis of the association between rs1746048 (CXCL12) and CAD. Supplementary Figure 7: relationship between highly expressed genes in a specific tissue and genetic associations. Supplementary Figure 8: gene expression heat map by hierarchical clustering. Supplementary Figure 9: transcription factor binding site enrichment analysis of CAD susceptibility loci. Supplementary Figure 10: genetic annotation analysis of CAD susceptibility loci. Supplementary Figure 11: histone modification enrichment analysis of CAD susceptibility loci. Supplementary Figure 12: Manhattan plots of SMR tests for association between gene expression and CAD. Supplementary Figure 13: prioritizing genes at GWAS loci using SMR analysis. Supplementary Figure 14: effect sizes of SNPs from GWAS plotted against those for SNPs from eQTL studies. Supplementary Table 1: integrating the population-specific genetic variants reported before and identified by a gene-based test in the present study. Supplementary Table 2: meta-analysis of population-specific genetic variants. Supplementary Table 3: identification of CAD risk genes by using VEGAS. Supplementary Table 4: the results of regulatory element enrichment analysis for CAD in the European population. Supplementary Table 5: the results of regulatory element enrichment analysis for CAD in the Asian population. [file 7036592.f1.zip › Supplementary_Table4-5.xlsx]

## Sheet: Supplementary Table 4
Supplementary Table 4. The results of regulatory element enrichment analysis for CAD in European population.
ID	PThresh	OR	Pvalue	Beta	SE	CI95_lower	CI95_upper	NAnnotThesh	NAnnot	NThresh	N	linkID	Annotation	Celltype	Tissue	Type	Category
1	0.01	1.63685	0.00464011	0.492772	0.174062	0.15161	0.833934	44	1674	750	42264	0	AG10803_footprints.txt	AG10803	skin	footprints	Footprints
1	0.0001	3.16946	0.0424801	1.15356	0.568597	0.0391115	2.26801	5	1674	36	42264	0	AG10803_footprints.txt	AG10803	skin	footprints	Footprints
1	1e-06	7.54538e-07	0.998127	-14.0972	6004.03	-11782	11753.8	0	1674	3	42264	0	AG10803_footprints.txt	AG10803	skin	footprints	Footprints
1	1e-08	1.59343e-06	0.99814	-13.3496	5725.78	-11235.9	11209.2	0	1674	2	42264	0	AG10803_footprints.txt	AG10803	skin	footprints	Footprints
1	1e-10	1	1	-1.12069e-16	10071.3	-19739.8	19739.8	0	1674	0	42264	0	AG10803_footprints.txt	AG10803	skin	footprints	Footprints
1	1e-12	1	1	-1.12069e-16	10071.3	-19739.8	19739.8	0	1674	0	42264	0	AG10803_footprints.txt	AG10803	skin	footprints	Footprints
1	1e-14	1	1	-1.12069e-16	10071.3	-19739.8	19739.8	0	1674	0	42264	0	AG10803_footprints.txt	AG10803	skin	footprints	Footprints
1	1e-16	1	1	-1.12069e-16	10071.3	-19739.8	19739.8	0	1674	0	42264	0	AG10803_footprints.txt	AG10803	skin	footprints	Footprints
1	1e-18	1	1	-1.12069e-16	10071.3	-19739.8	19739.8	0	1674	0	42264	0	AG10803_footprints.txt	AG10803	skin	footprints	Footprints
1	1e-20	1	1	-1.12069e-16	10071.3	-19739.8	19739.8	0	1674	0	42264	0	AG10803_footprints.txt	AG10803	skin	footprints	Footprints
2	0.01	1.31427	0.097804	0.273279	0.165064	-0.0502464	0.596804	50	2255	750	42264	1	AoAF_footprints.txt	AoAF	blood_vessel	footprints	Footprints
2	0.0001	1.54657	0.469864	0.436043	0.603352	-0.746527	1.61861	4	2255	36	42264	1	AoAF_footprints.txt	AoAF	blood_vessel	footprints	Footprints
2	1e-06	6.53848e-07	0.997815	-14.2404	5199.44	-10205.1	10176.7	0	2255	3	42264	1	AoAF_footprints.txt	AoAF	blood_vessel	footprints	Footprints
2	1e-08	1.59598e-06	0.997848	-13.348	4948.88	-9713.15	9686.46	0	2255	2	42264	1	AoAF_footprints.txt	AoAF	blood_vessel	footprints	Footprints
2	1e-10	1	1	-1.56992e-16	8792.56	-17233.4	17233.4	0	2255	0	42264	1	AoAF_footprints.txt	AoAF	blood_vessel	footprints	Footprints
2	1e-12	1	1	-1.56992e-16	8792.56	-17233.4	17233.4	0	2255	0	42264	1	AoAF_footprints.txt	AoAF	blood_vessel	footprints	Footprints
2	1e-14	1	1	-1.56992e-16	8792.56	-17233.4	17233.4	0	2255	0	42264	1	AoAF_footprints.txt	AoAF	blood_vessel	footprints	Footprints
2	1e-16	1	1	-1.56992e-16	8792.56	-17233.4	17233.4	0	2255	0	42264	1	AoAF_footprints.txt	AoAF	blood_vessel	footprints	Footprints
2	1e-18	1	1	-1.56992e-16	8792.56	-17233.4	17233.4	0	2255	0	42264	1	AoAF_footprints.txt	AoAF	blood_vessel	footprints	Footprints
2	1e-20	1	1	-1.56992e-16	8792.56	-17233.4	17233.4	0	2255	0	42264	1	AoAF_footprints.txt	AoAF	blood_vessel	footprints	Footprints
3	0.01	1.47636	0.0978686	0.389578	0.235355	-0.0717184	0.850874	21	817	750	42264	2	CD20+_footprints.txt	CD20+	blood	footprints	Footprints
3	0.0001	6.18647	0.00164888	1.82236	0.579058	0.687411	2.95732	5	817	36	42264	2	CD20+_footprints.txt	CD20+	blood	footprints	Footprints
3	1e-06	1.43198e-06	0.998669	-13.4565	8065.38	-15821.6	15794.7	0	817	3	42264	2	CD20+_footprints.txt	CD20+	blood	footprints	Footprints
3	1e-08	2.65836e-06	0.998669	-12.8378	7696.1	-15097.2	15071.5	0	817	2	42264	2	CD20+_footprints.txt	CD20+	blood	footprints	Footprints
3	1e-10	1	1	-7.60423e-17	13446.7	-26355.5	26355.5	0	817	0	42264	2	CD20+_footprints.txt	CD20+	blood	footprints	Footprints
3	1e-12	1	1	-7.60423e-17	13446.7	-26355.5	26355.5	0	817	0	42264	2	CD20+_footprints.txt	CD20+	blood	footprints	Footprints
3	1e-14	1	1	-7.60423e-17	13446.7	-26355.5	26355.5	0	817	0	42264	2	CD20+_footprints.txt	CD20+	blood	footprints	Footprints
3	1e-16	1	1	-7.60423e-17	13446.7	-26355.5	26355.5	0	817	0	42264	2	CD20+_footprints.txt	CD20+	blood	footprints	Footprints
3	1e-18	1	1	-7.60423e-17	13446.7	-26355.5	26355.5	0	817	0	42264	2	CD20+_footprints.txt	CD20+	blood	footprints	Footprints
3	1e-20	1	1	-7.60423e-17	13446.7	-26355.5	26355.5	0	817	0	42264	2	CD20+_footprints.txt	CD20+	blood	footprints	Footprints
4	0.01	1.41747	0.0663181	0.348872	0.18999	-0.023508	0.721253	37	1445	750	42264	3	CD34+_Mobilized_footprints.txt	CD34+	blood	footprints	Footprints
4	0.0001	2.47222	0.135459	0.905115	0.606273	-0.28318	2.09341	4	1445	36	42264	3	CD34+_Mobilized_footprints.txt	CD34+	blood	footprints	Footprints
4	1e-06	1.95628e-06	0.998315	-13.1445	6224.07	-12212.3	12186	0	1445	3	42264	3	CD34+_Mobilized_footprints.txt	CD34+	blood	footprints	Footprints
4	1e-08	0.804732	0.999978	-0.217246	7728.63	-15148.3	15147.9	0	1445	2	42264	3	CD34+_Mobilized_footprints.txt	CD34+	blood	footprints	Footprints
4	1e-10	1	1	-1.17189e-16	10529.4	-20637.6	20637.6	0	1445	0	42264	3	CD34+_Mobilized_footprints.txt	CD34+	blood	footprints	Footprints
4	1e-12	1	1	-1.17189e-16	10529.4	-20637.6	20637.6	0	1445	0	42264	3	CD34+_Mobilized_footprints.txt	CD34+	blood	footprints	Footprints
4	1e-14	1	1	-1.17189e-16	10529.4	-20637.6	20637.6	0	1445	0	42264	3	CD34+_Mobilized_footprints.txt	CD34+	blood	footprints	Footprints
4	1e-16	1	1	-1.17189e-16	10529.4	-20637.6	20637.6	0	1445	0	42264	3	CD34+_Mobilized_footprints.txt	CD34+	blood	footprints	Footprints
4	1e-18	1	1	-1.17189e-16	10529.4	-20637.6	20637.6	0	1445	0	42264	3	CD34+_Mobilized_footprints.txt	CD34+	blood	footprints	Footprints
4	1e-20	1	1	-1.17189e-16	10529.4	-20637.6	20637.6	0	1445	0	42264	3	CD34+_Mobilized_footprints.txt	CD34+	blood	footprints	Footprints
5	0.01	1.50118	0.0205441	0.406252	0.175391	0.0624849	0.750018	48	1853	750	42264	4	fBrain_footprints.txt	fBrain	fetal_brain	footprints	Footprints
5	0.0001	2.2593	0.17656	0.815054	0.603109	-0.367039	1.99715	4	1853	36	42264	4	fBrain_footprints.txt	fBrain	fetal_brain	footprints	Footprints
5	1e-06	7.11119e-07	0.998066	-14.1564	5841.81	-11464.1	11435.8	0	1853	3	42264	4	fBrain_footprints.txt	fBrain	fetal_brain	footprints	Footprints
5	1e-08	1.67901e-06	0.998098	-13.2973	5577.94	-10946.1	10919.5	0	1853	2	42264	4	fBrain_footprints.txt	fBrain	fetal_brain	footprints	Footprints
5	1e-10	1	1	-7.85546e-17	9838.31	-19283.1	19283.1	0	1853	0	42264	4	fBrain_footprints.txt	fBrain	fetal_brain	footprints	Footprints
5	1e-12	1	1	-7.85546e-17	9838.31	-19283.1	19283.1	0	1853	0	42264	4	fBrain_footprints.txt	fBrain	fetal_brain	footprints	Footprints
5	1e-14	1	1	-7.85546e-17	9838.31	-19283.1	19283.1	0	1853	0	42264	4	fBrain_footprints.txt	fBrain	fetal_brain	footprints	Footprints
5	1e-16	1	1	-7.85546e-17	9838.31	-19283.1	19283.1	0	1853	0	42264	4	fBrain_footprints.txt	fBrain	fetal_brain	footprints	Footprints
5	1e-18	1	1	-7.85546e-17	9838.31	-19283.1	19283.1	0	1853	0	42264	4	fBrain_footprints.txt	fBrain	fetal_brain	footprints	Footprints
5	1e-20	1	1	-7.85546e-17	9838.31	-19283.1	19283.1	0	1853	0	42264	4	fBrain_footprints.txt	fBrain	fetal_brain	footprints	Footprints
6	0.01	1.64766	0.00501125	0.499356	0.17794	0.150593	0.848119	45	1564	750	42264	5	fHeart_footprints.txt	fHeart	fetal_heart	footprints	Footprints
6	0.0001	2.3782	0.152436	0.866345	0.605421	-0.32028	2.05297	5	1564	36	42264	5	fHeart_footprints.txt	fHeart	fetal_heart	footprints	Footprints
6	1e-06	1.79454e-06	0.99826	-13.2308	6068.08	-11906.7	11880.2	0	1564	3	42264	5	fHeart_footprints.txt	fHeart	fetal_heart	footprints	Footprints
6	1e-08	4.72266e-06	0.998305	-12.2631	5774.11	-11329.5	11305	0	1564	2	42264	5	fHeart_footprints.txt	fHeart	fetal_heart	footprints	Footprints
6	1e-10	1	1	-8.48122e-17	10318.6	-20224.4	20224.4	0	1564	0	42264	5	fHeart_footprints.txt	fHeart	fetal_heart	footprints	Footprints
6	1e-12	1	1	-8.48122e-17	10318.6	-20224.4	20224.4	0	1564	0	42264	5	fHeart_footprints.txt	fHeart	fetal_heart	footprints	Footprints
6	1e-14	1	1	-8.48122e-17	10318.6	-20224.4	20224.4	0	1564	0	42264	5	fHeart_footprints.txt	fHeart	fetal_heart	footprints	Footprints
6	1e-16	1	1	-8.48122e-17	10318.6	-20224.4	20224.4	0	1564	0	42264	5	fHeart_footprints.txt	fHeart	fetal_heart	footprints	Footprints
6	1e-18	1	1	-8.48122e-17	10318.6	-20224.4	20224.4	0	1564	0	42264	5	fHeart_footprints.txt	fHeart	fetal_heart	footprints	Footprints
6	1e-20	1	1	-8.48122e-17	10318.6	-20224.4	20224.4	0	1564	0	42264	5	fHeart_footprints.txt	fHeart	fetal_heart	footprints	Footprints
7	0.01	1.27672	0.168031	0.244298	0.177212	-0.103038	0.591634	43	1967	750	42264	6	fLung_footprints.txt	fLung	fetal_lung	footprints	Footprints
7	0.0001	2.67506	0.082184	0.98397	0.566101	-0.125588	2.09353	5	1967	36	42264	6	fLung_footprints.txt	fLung	fetal_lung	footprints	Footprints
7	1e-06	6.2981e-07	0.997943	-14.2778	5539.01	-10870.7	10842.2	0	1967	3	42264	6	fLung_footprints.txt	fLung	fetal_lung	footprints	Footprints
7	1e-08	9.15674e-07	0.997916	-13.9036	5322.07	-10445.2	10417.4	0	1967	2	42264	6	fLung_footprints.txt	fLung	fetal_lung	footprints	Footprints
7	1e-10	1	1	-7.38423e-17	9416.85	-18457	18457	0	1967	0	42264	6	fLung_footprints.txt	fLung	fetal_lung	footprints	Footprints
7	1e-12	1	1	-7.38423e-17	9416.85	-18457	18457	0	1967	0	42264	6	fLung_footprints.txt	fLung	fetal_lung	footprints	Footprints
7	1e-14	1	1	-7.38423e-17	9416.85	-18457	18457	0	1967	0	42264	6	fLung_footprints.txt	fLung	fetal_lung	footprints	Footprints
7	1e-16	1	1	-7.38423e-17	9416.85	-18457	18457	0	1967	0	42264	6	fLung_footprints.txt	fLung	fetal_lung	footprints	Footprints
7	1e-18	1	1	-7.38423e-17	9416.85	-18457	18457	0	1967	0	42264	6	fLung_footprints.txt	fLung	fetal_lung	footprints	Footprints
7	1e-20	1	1	-7.38423e-17	9416.85	-18457	18457	0	1967	0	42264	6	fLung_footprints.txt	fLung	fetal_lung	footprints	Footprints
8	0.01	1.52348	0.0959598	0.420995	0.252886	-0.0746608	0.916651	18	675	750	42264	7	GM06990_footprints.txt	GM06990	blood	footprints	Footprints
8	0.0001	5.43081	0.00591083	1.69209	0.614704	0.487268	2.89691	4	675	36	42264	7	GM06990_footprints.txt	GM06990	blood	footprints	Footprints
8	1e-06	0.80578	0.999985	-0.215944	11278.5	-22106.1	22105.7	0	675	3	42264	7	GM06990_footprints.txt	GM06990	blood	footprints	Footprints
8	1e-08	0.919431	0.999994	-0.0840005	10765.8	-21101.1	21100.9	0	675	2	42264	7	GM06990_footprints.txt	GM06990	blood	footprints	Footprints
8	1e-10	1	1	-8.96317e-17	14729.9	-28870.6	28870.6	0	675	0	42264	7	GM06990_footprints.txt	GM06990	blood	footprints	Footprints
8	1e-12	1	1	-8.96317e-17	14729.9	-28870.6	28870.6	0	675	0	42264	7	GM06990_footprints.txt	GM06990	blood	footprints	Footprints
8	1e-14	1	1	-8.96317e-17	14729.9	-28870.6	28870.6	0	675	0	42264	7	GM06990_footprints.txt	GM06990	blood	footprints	Footprints
8	1e-16	1	1	-8.96317e-17	14729.9	-28870.6	28870.6	0	675	0	42264	7	GM06990_footprints.txt	GM06990	blood	footprints	Footprints
8	1e-18	1	1	-8.96317e-17	14729.9	-28870.6	28870.6	0	675	0	42264	7	GM06990_footprints.txt	GM06990	blood	footprints	Footprints
8	1e-20	1	1	-8.96317e-17	14729.9	-28870.6	28870.6	0	675	0	42264	7	GM06990_footprints.txt	GM06990	blood	footprints	Footprints
9	0.01	1.39889	0.0943499	0.33568	0.200659	-0.0576122	0.728973	34	1280	750	42264	8	GM12865_footprints.txt	GM12865	blood	footprints	Footprints
9	0.0001	2.84077	0.0860412	1.04408	0.608201	-0.147999	2.23615	4	1280	36	42264	8	GM12865_footprints.txt	GM12865	blood	footprints	Footprints
9	1e-06	0.774532	0.999976	-0.255497	8514.83	-16689.3	16688.8	0	1280	3	42264	8	GM12865_footprints.txt	GM12865	blood	footprints	Footprints
9	1e-08	0.80106	0.999978	-0.221819	8143.35	-15961.2	15960.8	0	1280	2	42264	8	GM12865_footprints.txt	GM12865	blood	footprints	Footprints
9	1e-10	1	1	-8.55928e-17	11137.1	-21828.7	21828.7	0	1280	0	42264	8	GM12865_footprints.txt	GM12865	blood	footprints	Footprints
9	1e-12	1	1	-8.55928e-17	11137.1	-21828.7	21828.7	0	1280	0	42264	8	GM12865_footprints.txt	GM12865	blood	footprints	Footprints
9	1e-14	1	1	-8.55928e-17	11137.1	-21828.7	21828.7	0	1280	0	42264	8	GM12865_footprints.txt	GM12865	blood	footprints	Footprints
9	1e-16	1	1	-8.55928e-17	11137.1	-21828.7	21828.7	0	1280	0	42264	8	GM12865_footprints.txt	GM12865	blood	footprints	Footprints
9	1e-18	1	1	-8.55928e-17	11137.1	-21828.7	21828.7	0	1280	0	42264	8	GM12865_footprints.txt	GM12865	blood	footprints	Footprints
9	1e-20	1	1	-8.55928e-17	11137.1	-21828.7	21828.7	0	1280	0	42264	8	GM12865_footprints.txt	GM12865	blood	footprints	Footprints
10	0.01	1.35509	0.0718854	0.303869	0.168831	-0.0270394	0.634778	51	2209	750	42264	9	H7-hESC_footprints.txt	H7-hESC	es_cell	footprints	Footprints
10	0.0001	1.11736	0.868698	0.110969	0.671269	-1.20472	1.42666	3	2209	36	42264	9	H7-hESC_footprints.txt	H7-hESC	es_cell	footprints	Footprints
10	1e-06	1.87976e-06	0.997984	-13.1844	5216.94	-10238.4	10212	0	2209	3	42264	9	H7-hESC_footprints.txt	H7-hESC	es_cell	footprints	Footprints
10	1e-08	6.32907e-06	0.998085	-11.9704	4987.79	-9788.04	9764.1	0	2209	2	42264	9	H7-hESC_footprints.txt	H7-hESC	es_cell	footprints	Footprints
10	1e-10	1	1	-1.33398e-16	9103.51	-17842.9	17842.9	0	2209	0	42264	9	H7-hESC_footprints.txt	H7-hESC	es_cell	footprints	Footprints
10	1e-12	1	1	-1.33398e-16	9103.51	-17842.9	17842.9	0	2209	0	42264	9	H7-hESC_footprints.txt	H7-hESC	es_cell	footprints	Footprints
10	1e-14	1	1	-1.33398e-16	9103.51	-17842.9	17842.9	0	2209	0	42264	9	H7-hESC_footprints.txt	H7-hESC	es_cell	footprints	Footprints
10	1e-16	1	1	-1.33398e-16	9103.51	-17842.9	17842.9	0	2209	0	42264	9	H7-hESC_footprints.txt	H7-hESC	es_cell	footprints	Footprints
10	1e-18	1	1	-1.33398e-16	9103.51	-17842.9	17842.9	0	2209	0	42264	9	H7-hESC_footprints.txt	H7-hESC	es_cell	footprints	Footprints
10	1e-20	1	1	-1.33398e-16	9103.51	-17842.9	17842.9	0	2209	0	42264	9	H7-hESC_footprints.txt	H7-hESC	es_cell	footprints	Footprints
11	0.01	1.16621	0.387133	0.153758	0.17779	-0.194711	0.502227	45	2123	750	42264	10	HAEpiC_footprints.txt	HAEpiC	epithelium	footprints	Footprints
11	0.0001	1.13189	0.853414	0.123892	0.670541	-1.19037	1.43815	3	2123	36	42264	10	HAEpiC_footprints.txt	HAEpiC	epithelium	footprints	Footprints
11	1e-06	1.36824e-06	0.997971	-13.502	5309.35	-10419.8	10392.8	0	2123	3	42264	10	HAEpiC_footprints.txt	HAEpiC	epithelium	footprints	Footprints
11	1e-08	3.04031e-06	0.998006	-12.7036	5082.72	-9974.84	9949.43	0	2123	2	42264	10	HAEpiC_footprints.txt	HAEpiC	epithelium	footprints	Footprints
11	1e-10	1	1	-1.43632e-16	9158.83	-17951.3	17951.3	0	2123	0	42264	10	HAEpiC_footprints.txt	HAEpiC	epithelium	footprints	Footprints
11	1e-12	1	1	-1.43632e-16	9158.83	-17951.3	17951.3	0	2123	0	42264	10	HAEpiC_footprints.txt	HAEpiC	epithelium	footprints	Footprints
11	1e-14	1	1	-1.43632e-16	9158.83	-17951.3	17951.3	0	2123	0	42264	10	HAEpiC_footprints.txt	HAEpiC	epithelium	footprints	Footprints
11	1e-16	1	1	-1.43632e-16	9158.83	-17951.3	17951.3	0	2123	0	42264	10	HAEpiC_footprints.txt	HAEpiC	epithelium	footprints	Footprints
11	1e-18	1	1	-1.43632e-16	9158.83	-17951.3	17951.3	0	2123	0	42264	10	HAEpiC_footprints.txt	HAEpiC	epithelium	footprints	Footprints
11	1e-20	1	1	-1.43632e-16	9158.83	-17951.3	17951.3	0	2123	0	42264	10	HAEpiC_footprints.txt	HAEpiC	epithelium	footprints	Footprints
12	0.01	1.56251	0.0151512	0.446291	0.183754	0.0861336	0.806449	40	1490	750	42264	11	HA-h_footprints.txt	HA-h	brain_hippocampus	footprints	Footprints
12	0.0001	2.51601	0.130092	0.922673	0.609533	-0.272011	2.11736	4	1490	36	42264	11	HA-h_footprints.txt	HA-h	brain_hippocampus	footprints	Footprints
12	1e-06	9.03388e-07	0.998221	-13.9171	6241.54	-12247.3	12219.5	0	1490	3	42264	11	HA-h_footprints.txt	HA-h	brain_hippocampus	footprints	Footprints
12	1e-08	4.52464e-06	0.998336	-12.306	5899.1	-11574.6	11549.9	0	1490	2	42264	11	HA-h_footprints.txt	HA-h	brain_hippocampus	footprints	Footprints
12	1e-10	1	1	-7.42357e-17	10525.4	-20629.8	20629.8	0	1490	0	42264	11	HA-h_footprints.txt	HA-h	brain_hippocampus	footprints	Footprints
12	1e-12	1	1	-7.42357e-17	10525.4	-20629.8	20629.8	0	1490	0	42264	11	HA-h_footprints.txt	HA-h	brain_hippocampus	footprints	Footprints
12	1e-14	1	1	-7.42357e-17	10525.4	-20629.8	20629.8	0	1490	0	42264	11	HA-h_footprints.txt	HA-h	brain_hippocampus	footprints	Footprints
12	1e-16	1	1	-7.42357e-17	10525.4	-20629.8	20629.8	0	1490	0	42264	11	HA-h_footprints.txt	HA-h	brain_hippocampus	footprints	Footprints
12	1e-18	1	1	-7.42357e-17	10525.4	-20629.8	20629.8	0	1490	0	42264	11	HA-h_footprints.txt	HA-h	brain_hippocampus	footprints	Footprints
12	1e-20	1	1	-7.42357e-17	10525.4	-20629.8	20629.8	0	1490	0	42264	11	HA-h_footprints.txt	HA-h	brain_hippocampus	footprints	Footprints
13	0.01	1.62693	0.005611	0.486696	0.175722	0.14228	0.831111	43	1617	750	42264	12	HCF_footprints.txt	HCF	heart	footprints	Footprints
13	0.0001	2.29961	0.166877	0.83274	0.602427	-0.348017	2.0135	4	1617	36	42264	12	HCF_footprints.txt	HCF	heart	footprints	Footprints
13	1e-06	7.82002e-07	0.998149	-14.0614	6062.27	-11896.1	11868	0	1617	3	42264	12	HCF_footprints.txt	HCF	heart	footprints	Footprints
13	1e-08	2.37229e-06	0.998204	-12.9517	5754.02	-11290.8	11264.9	0	1617	2	42264	12	HCF_footprints.txt	HCF	heart	footprints	Footprints
13	1e-10	1	1	-1.48814e-16	10160.1	-19913.7	19913.7	0	1617	0	42264	12	HCF_footprints.txt	HCF	heart	footprints	Footprints
13	1e-12	1	1	-1.48814e-16	10160.1	-19913.7	19913.7	0	1617	0	42264	12	HCF_footprints.txt	HCF	heart	footprints	Footprints
13	1e-14	1	1	-1.48814e-16	10160.1	-19913.7	19913.7	0	1617	0	42264	12	HCF_footprints.txt	HCF	heart	footprints	Footprints
13	1e-16	1	1	-1.48814e-16	10160.1	-19913.7	19913.7	0	1617	0	42264	12	HCF_footprints.txt	HCF	heart	footprints	Footprints
13	1e-18	1	1	-1.48814e-16	10160.1	-19913.7	19913.7	0	1617	0	42264	12	HCF_footprints.txt	HCF	heart	footprints	Footprints
13	1e-20	1	1	-1.48814e-16	10160.1	-19913.7	19913.7	0	1617	0	42264	12	HCF_footprints.txt	HCF	heart	footprints	Footprints
14	0.01	1.64254	0.0033017	0.496242	0.168896	0.165206	0.827277	47	1772	750	42264	13	HCM_footprints.txt	HCM	heart	footprints	Footprints
14	0.0001	2.03614	0.238391	0.711056	0.603092	-0.471005	1.89312	4	1772	36	42264	13	HCM_footprints.txt	HCM	heart	footprints	Footprints
14	1e-06	5.99141e-07	0.998028	-14.3278	5796.39	-11375.3	11346.6	0	1772	3	42264	13	HCM_footprints.txt	HCM	heart	footprints	Footprints
14	1e-08	1.01285e-06	0.998016	-13.8027	5549.85	-10891.5	10863.9	0	1772	2	42264	13	HCM_footprints.txt	HCM	heart	footprints	Footprints
14	1e-10	1	1	-1.17157e-16	9723.43	-19057.9	19057.9	0	1772	0	42264	13	HCM_footprints.txt	HCM	heart	footprints	Footprints
14	1e-12	1	1	-1.17157e-16	9723.43	-19057.9	19057.9	0	1772	0	42264	13	HCM_footprints.txt	HCM	heart	footprints	Footprints
14	1e-14	1	1	-1.17157e-16	9723.43	-19057.9	19057.9	0	1772	0	42264	13	HCM_footprints.txt	HCM	heart	footprints	Footprints
14	1e-16	1	1	-1.17157e-16	9723.43	-19057.9	19057.9	0	1772	0	42264	13	HCM_footprints.txt	HCM	heart	footprints	Footprints
14	1e-18	1	1	-1.17157e-16	9723.43	-19057.9	19057.9	0	1772	0	42264	13	HCM_footprints.txt	HCM	heart	footprints	Footprints
14	1e-20	1	1	-1.17157e-16	9723.43	-19057.9	19057.9	0	1772	0	42264	13	HCM_footprints.txt	HCM	heart	footprints	Footprints
15	0.01	1.39564	0.0498549	0.333356	0.169975	0.000205189	0.666507	46	2007	750	42264	14	HCPEpiC_footprints.txt	HCPEpiC	epithelium	footprints	Footprints
15	0.0001	1.21873	0.766289	0.197807	0.665496	-1.10656	1.50218	3	2007	36	42264	14	HCPEpiC_footprints.txt	HCPEpiC	epithelium	footprints	Footprints
15	1e-06	7.04099e-07	0.997936	-14.1663	5477.38	-10749.8	10721.5	0	2007	3	42264	14	HCPEpiC_footprints.txt	HCPEpiC	epithelium	footprints	Footprints
15	1e-08	9.34064e-07	0.997898	-13.8837	5269.42	-10341.9	10314.2	0	2007	2	42264	14	HCPEpiC_footprints.txt	HCPEpiC	epithelium	footprints	Footprints
15	1e-10	1	1	-1.4426e-16	9266.68	-18162.7	18162.7	0	2007	0	42264	14	HCPEpiC_footprints.txt	HCPEpiC	epithelium	footprints	Footprints
15	1e-12	1	1	-1.4426e-16	9266.68	-18162.7	18162.7	0	2007	0	42264	14	HCPEpiC_footprints.txt	HCPEpiC	epithelium	footprints	Footprints
15	1e-14	1	1	-1.4426e-16	9266.68	-18162.7	18162.7	0	2007	0	42264	14	HCPEpiC_footprints.txt	HCPEpiC	epithelium	footprints	Footprints
15	1e-16	1	1	-1.4426e-16	9266.68	-18162.7	18162.7	0	2007	0	42264	14	HCPEpiC_footprints.txt	HCPEpiC	epithelium	footprints	Footprints
15	1e-18	1	1	-1.4426e-16	9266.68	-18162.7	18162.7	0	2007	0	42264	14	HCPEpiC_footprints.txt	HCPEpiC	epithelium	footprints	Footprints
15	1e-20	1	1	-1.4426e-16	9266.68	-18162.7	18162.7	0	2007	0	42264	14	HCPEpiC_footprints.txt	HCPEpiC	epithelium	footprints	Footprints
16	0.01	1.38945	0.0493223	0.328909	0.167316	0.000969597	0.656848	51	2142	750	42264	15	HEEpiC_footprints.txt	HEEpiC	epithelium	footprints	Footprints
16	0.0001	1.65833	0.406948	0.505809	0.60994	-0.689674	1.70129	4	2142	36	42264	15	HEEpiC_footprints.txt	HEEpiC	epithelium	footprints	Footprints
16	1e-06	1.94823e-06	0.997974	-13.1486	5178.22	-10162.5	10136.2	0	2142	3	42264	15	HEEpiC_footprints.txt	HEEpiC	epithelium	footprints	Footprints
16	1e-08	2.0764e-06	0.997919	-13.0849	5015.86	-9844.17	9818	0	2142	2	42264	15	HEEpiC_footprints.txt	HEEpiC	epithelium	footprints	Footprints
16	1e-10	1	1	-7.73602e-17	9083.97	-17804.6	17804.6	0	2142	0	42264	15	HEEpiC_footprints.txt	HEEpiC	epithelium	footprints	Footprints
16	1e-12	1	1	-7.73602e-17	9083.97	-17804.6	17804.6	0	2142	0	42264	15	HEEpiC_footprints.txt	HEEpiC	epithelium	footprints	Footprints
16	1e-14	1	1	-7.73602e-17	9083.97	-17804.6	17804.6	0	2142	0	42264	15	HEEpiC_footprints.txt	HEEpiC	epithelium	footprints	Footprints
16	1e-16	1	1	-7.73602e-17	9083.97	-17804.6	17804.6	0	2142	0	42264	15	HEEpiC_footprints.txt	HEEpiC	epithelium	footprints	Footprints
16	1e-18	1	1	-7.73602e-17	9083.97	-17804.6	17804.6	0	2142	0	42264	15	HEEpiC_footprints.txt	HEEpiC	epithelium	footprints	Footprints
16	1e-20	1	1	-7.73602e-17	9083.97	-17804.6	17804.6	0	2142	0	42264	15	HEEpiC_footprints.txt	HEEpiC	epithelium	footprints	Footprints
17	0.01	1.53228	0.0822776	0.426758	0.245599	-0.054616	0.908132	21	729	750	42264	16	HepG2_footprints.txt	HepG2	liver	footprints	Footprints
17	0.0001	0.911971	0.930048	-0.0921467	1.04969	-2.14954	1.96524	1	729	36	42264	16	HepG2_footprints.txt	HepG2	liver	footprints	Footprints
17	1e-06	0.992145	0.999999	-0.00788636	10874.8	-21314.6	21314.5	0	729	3	42264	16	HepG2_footprints.txt	HepG2	liver	footprints	Footprints
17	1e-08	1.11225	0.999992	0.106385	10427.2	-20437.3	20437.5	0	729	2	42264	16	HepG2_footprints.txt	HepG2	liver	footprints	Footprints
17	1e-10	1	1	-3.18263e-17	14272.3	-27973.7	27973.7	0	729	0	42264	16	HepG2_footprints.txt	HepG2	liver	footprints	Footprints
17	1e-12	1	1	-3.18263e-17	14272.3	-27973.7	27973.7	0	729	0	42264	16	HepG2_footprints.txt	HepG2	liver	footprints	Footprints
17	1e-14	1	1	-3.18263e-17	14272.3	-27973.7	27973.7	0	729	0	42264	16	HepG2_footprints.txt	HepG2	liver	footprints	Footprints
17	1e-16	1	1	-3.18263e-17	14272.3	-27973.7	27973.7	0	729	0	42264	16	HepG2_footprints.txt	HepG2	liver	footprints	Footprints
17	1e-18	1	1	-3.18263e-17	14272.3	-27973.7	27973.7	0	729	0	42264	16	HepG2_footprints.txt	HepG2	liver	footprints	Footprints
17	1e-20	1	1	-3.18263e-17	14272.3	-27973.7	27973.7	0	729	0	42264	16	HepG2_footprints.txt	HepG2	liver	footprints	Footprints
18	0.01	1.34551	0.19558	0.296771	0.2293	-0.152657	0.746199	22	966	750	42264	17	HFF_footprints.txt	HFF	foreskin	footprints	Footprints
18	0.0001	4.03182	0.0221383	1.39422	0.609365	0.199864	2.58857	4	966	36	42264	17	HFF_footprints.txt	HFF	foreskin	footprints	Footprints
18	1e-06	2.78823e-06	0.998642	-12.7901	7514.74	-14741.7	14716.1	0	966	3	42264	17	HFF_footprints.txt	HFF	foreskin	footprints	Footprints
18	1e-08	2.99085e-06	0.998601	-12.72	7255.73	-14233.9	14208.5	0	966	2	42264	17	HFF_footprints.txt	HFF	foreskin	footprints	Footprints
18	1e-10	1	1	-7.47944e-17	12669.2	-24831.6	24831.6	0	966	0	42264	17	HFF_footprints.txt	HFF	foreskin	footprints	Footprints
18	1e-12	1	1	-7.47944e-17	12669.2	-24831.6	24831.6	0	966	0	42264	17	HFF_footprints.txt	HFF	foreskin	footprints	Footprints
18	1e-14	1	1	-7.47944e-17	12669.2	-24831.6	24831.6	0	966	0	42264	17	HFF_footprints.txt	HFF	foreskin	footprints	Footprints
18	1e-16	1	1	-7.47944e-17	12669.2	-24831.6	24831.6	0	966	0	42264	17	HFF_footprints.txt	HFF	foreskin	footprints	Footprints
18	1e-18	1	1	-7.47944e-17	12669.2	-24831.6	24831.6	0	966	0	42264	17	HFF_footprints.txt	HFF	foreskin	footprints	Footprints
18	1e-20	1	1	-7.47944e-17	12669.2	-24831.6	24831.6	0	966	0	42264	17	HFF_footprints.txt	HFF	foreskin	footprints	Footprints
19	0.01	1.21005	0.302967	0.190662	0.185092	-0.172119	0.553443	39	1811	750	42264	18	HIPEpiC_footprints.txt	HIPEpiC	epithelium	footprints	Footprints
19	0.0001	1.33228	0.667672	0.286892	0.668208	-1.0228	1.59658	3	1811	36	42264	18	HIPEpiC_footprints.txt	HIPEpiC	epithelium	footprints	Footprints
19	1e-06	7.46697e-07	0.998034	-14.1076	5726.63	-11238.3	11210.1	0	1811	3	42264	18	HIPEpiC_footprints.txt	HIPEpiC	epithelium	footprints	Footprints
19	1e-08	1.0286e-06	0.998002	-13.7873	5507.19	-10807.9	10780.3	0	1811	2	42264	18	HIPEpiC_footprints.txt	HIPEpiC	epithelium	footprints	Footprints
19	1e-10	1	1	-1.08347e-16	9690.97	-18994.3	18994.3	0	1811	0	42264	18	HIPEpiC_footprints.txt	HIPEpiC	epithelium	footprints	Footprints
19	1e-12	1	1	-1.08347e-16	9690.97	-18994.3	18994.3	0	1811	0	42264	18	HIPEpiC_footprints.txt	HIPEpiC	epithelium	footprints	Footprints
19	1e-14	1	1	-1.08347e-16	9690.97	-18994.3	18994.3	0	1811	0	42264	18	HIPEpiC_footprints.txt	HIPEpiC	epithelium	footprints	Footprints
19	1e-16	1	1	-1.08347e-16	9690.97	-18994.3	18994.3	0	1811	0	42264	18	HIPEpiC_footprints.txt	HIPEpiC	epithelium	footprints	Footprints
19	1e-18	1	1	-1.08347e-16	9690.97	-18994.3	18994.3	0	1811	0	42264	18	HIPEpiC_footprints.txt	HIPEpiC	epithelium	footprints	Footprints
19	1e-20	1	1	-1.08347e-16	9690.97	-18994.3	18994.3	0	1811	0	42264	18	HIPEpiC_footprints.txt	HIPEpiC	epithelium	footprints	Footprints
20	0.01	1.26608	0.164737	0.235926	0.169814	-0.0969105	0.568762	46	2150	750	42264	19	HMF_footprints.txt	HMF	breast	footprints	Footprints
20	0.0001	2.27717	0.147448	0.822933	0.568086	-0.290516	1.93638	5	2150	36	42264	19	HMF_footprints.txt	HMF	breast	footprints	Footprints
20	1e-06	7.82526e-07	0.997879	-14.0607	5290.22	-10382.9	10354.8	0	2150	3	42264	19	HMF_footprints.txt	HMF	breast	footprints	Footprints
20	1e-08	2.06922e-06	0.997922	-13.0883	5024.55	-9861.21	9835.03	0	2150	2	42264	19	HMF_footprints.txt	HMF	breast	footprints	Footprints
20	1e-10	1	1	-1.90737e-16	8957.08	-17555.9	17555.9	0	2150	0	42264	19	HMF_footprints.txt	HMF	breast	footprints	Footprints
20	1e-12	1	1	-1.90737e-16	8957.08	-17555.9	17555.9	0	2150	0	42264	19	HMF_footprints.txt	HMF	breast	footprints	Footprints
20	1e-14	1	1	-1.90737e-16	8957.08	-17555.9	17555.9	0	2150	0	42264	19	HMF_footprints.txt	HMF	breast	footprints	Footprints
20	1e-16	1	1	-1.90737e-16	8957.08	-17555.9	17555.9	0	2150	0	42264	19	HMF_footprints.txt	HMF	breast	footprints	Footprints
20	1e-18	1	1	-1.90737e-16	8957.08	-17555.9	17555.9	0	2150	0	42264	19	HMF_footprints.txt	HMF	breast	footprints	Footprints
20	1e-20	1	1	-1.90737e-16	8957.08	-17555.9	17555.9	0	2150	0	42264	19	HMF_footprints.txt	HMF	breast	footprints	Footprints
21	0.01	1.44482	0.0401963	0.367985	0.179354	0.0164514	0.719519	41	1662	750	42264	20	HMVEC-dBl-Ad_footprints.txt	HMVEC-dBl-Ad	blood_vessel	footprints	Footprints
21	0.0001	2.98378	0.0545816	1.09319	0.568721	-0.0215023	2.20788	5	1662	36	42264	20	HMVEC-dBl-Ad_footprints.txt	HMVEC-dBl-Ad	blood_vessel	footprints	Footprints
21	1e-06	1.49775e-06	0.998169	-13.4115	5844.51	-11468.6	11441.8	0	1662	3	42264	20	HMVEC-dBl-Ad_footprints.txt	HMVEC-dBl-Ad	blood_vessel	footprints	Footprints
21	1e-08	5.10153e-06	0.99825	-12.186	5555.56	-10901.1	10876.7	0	1662	2	42264	20	HMVEC-dBl-Ad_footprints.txt	HMVEC-dBl-Ad	blood_vessel	footprints	Footprints
21	1e-10	1	1	-1.65437e-16	9940.32	-19483	19483	0	1662	0	42264	20	HMVEC-dBl-Ad_footprints.txt	HMVEC-dBl-Ad	blood_vessel	footprints	Footprints
21	1e-12	1	1	-1.65437e-16	9940.32	-19483	19483	0	1662	0	42264	20	HMVEC-dBl-Ad_footprints.txt	HMVEC-dBl-Ad	blood_vessel	footprints	Footprints
21	1e-14	1	1	-1.65437e-16	9940.32	-19483	19483	0	1662	0	42264	20	HMVEC-dBl-Ad_footprints.txt	HMVEC-dBl-Ad	blood_vessel	footprints	Footprints
21	1e-16	1	1	-1.65437e-16	9940.32	-19483	19483	0	1662	0	42264	20	HMVEC-dBl-Ad_footprints.txt	HMVEC-dBl-Ad	blood_vessel	footprints	Footprints
21	1e-18	1	1	-1.65437e-16	9940.32	-19483	19483	0	1662	0	42264	20	HMVEC-dBl-Ad_footprints.txt	HMVEC-dBl-Ad	blood_vessel	footprints	Footprints
21	1e-20	1	1	-1.65437e-16	9940.32	-19483	19483	0	1662	0	42264	20	HMVEC-dBl-Ad_footprints.txt	HMVEC-dBl-Ad	blood_vessel	footprints	Footprints
22	0.01	1.42786	0.0499812	0.35618	0.181713	2.272e-05	0.712336	40	1616	750	42264	21	HMVEC-dBl-Neo_footprints.txt	HMVEC-dBl-Neo	blood_vessel	footprints	Footprints
22	0.0001	2.17956	0.200903	0.779123	0.609173	-0.414857	1.9731	4	1616	36	42264	21	HMVEC-dBl-Neo_footprints.txt	HMVEC-dBl-Neo	blood_vessel	footprints	Footprints
22	1e-06	2.20612e-06	0.998227	-13.0243	5861.05	-11500.7	11474.6	0	1616	3	42264	21	HMVEC-dBl-Neo_footprints.txt	HMVEC-dBl-Neo	blood_vessel	footprints	Footprints
22	1e-08	0.800154	0.999976	-0.222951	7353.36	-14412.8	14412.4	0	1616	2	42264	21	HMVEC-dBl-Neo_footprints.txt	HMVEC-dBl-Neo	blood_vessel	footprints	Footprints
22	1e-10	1	1	-7.85533e-17	10055.3	-19708.4	19708.4	0	1616	0	42264	21	HMVEC-dBl-Neo_footprints.txt	HMVEC-dBl-Neo	blood_vessel	footprints	Footprints
22	1e-12	1	1	-7.85533e-17	10055.3	-19708.4	19708.4	0	1616	0	42264	21	HMVEC-dBl-Neo_footprints.txt	HMVEC-dBl-Neo	blood_vessel	footprints	Footprints
22	1e-14	1	1	-7.85533e-17	10055.3	-19708.4	19708.4	0	1616	0	42264	21	HMVEC-dBl-Neo_footprints.txt	HMVEC-dBl-Neo	blood_vessel	footprints	Footprints
22	1e-16	1	1	-7.85533e-17	10055.3	-19708.4	19708.4	0	1616	0	42264	21	HMVEC-dBl-Neo_footprints.txt	HMVEC-dBl-Neo	blood_vessel	footprints	Footprints
22	1e-18	1	1	-7.85533e-17	10055.3	-19708.4	19708.4	0	1616	0	42264	21	HMVEC-dBl-Neo_footprints.txt	HMVEC-dBl-Neo	blood_vessel	footprints	Footprints
22	1e-20	1	1	-7.85533e-17	10055.3	-19708.4	19708.4	0	1616	0	42264	21	HMVEC-dBl-Neo_footprints.txt	HMVEC-dBl-Neo	blood_vessel	footprints	Footprints
23	0.01	1.45902	0.0376943	0.377767	0.181779	0.0214797	0.734053	41	1601	750	42264	22	HMVEC-dLy-Neo_footprints.txt	HMVEC-dLy-Neo	blood_vessel	footprints	Footprints
23	0.0001	3.07638	0.0500539	1.12375	0.573489	-0.000285211	2.24779	5	1601	36	42264	22	HMVEC-dLy-Neo_footprints.txt	HMVEC-dLy-Neo	blood_vessel	footprints	Footprints
23	1e-06	2.1727e-06	0.998238	-13.0395	5905.95	-11588.7	11562.6	0	1601	3	42264	22	HMVEC-dLy-Neo_footprints.txt	HMVEC-dLy-Neo	blood_vessel	footprints	Footprints
23	1e-08	0.767811	0.999972	-0.264212	7505.08	-14710.2	14709.7	0	1601	2	42264	22	HMVEC-dLy-Neo_footprints.txt	HMVEC-dLy-Neo	blood_vessel	footprints	Footprints
23	1e-10	1	1	-7.58454e-17	10122	-19839.2	19839.2	0	1601	0	42264	22	HMVEC-dLy-Neo_footprints.txt	HMVEC-dLy-Neo	blood_vessel	footprints	Footprints
23	1e-12	1	1	-7.58454e-17	10122	-19839.2	19839.2	0	1601	0	42264	22	HMVEC-dLy-Neo_footprints.txt	HMVEC-dLy-Neo	blood_vessel	footprints	Footprints
23	1e-14	1	1	-7.58454e-17	10122	-19839.2	19839.2	0	1601	0	42264	22	HMVEC-dLy-Neo_footprints.txt	HMVEC-dLy-Neo	blood_vessel	footprints	Footprints
23	1e-16	1	1	-7.58454e-17	10122	-19839.2	19839.2	0	1601	0	42264	22	HMVEC-dLy-Neo_footprints.txt	HMVEC-dLy-Neo	blood_vessel	footprints	Footprints
23	1e-18	1	1	-7.58454e-17	10122	-19839.2	19839.2	0	1601	0	42264	22	HMVEC-dLy-Neo_footprints.txt	HMVEC-dLy-Neo	blood_vessel	footprints	Footprints
23	1e-20	1	1	-7.58454e-17	10122	-19839.2	19839.2	0	1601	0	42264	22	HMVEC-dLy-Neo_footprints.txt	HMVEC-dLy-Neo	blood_vessel	footprints	Footprints
24	0.01	1.47698	0.0429633	0.389997	0.19268	0.0123443	0.76765	35	1364	750	42264	23	HMVEC-LLy_footprints.txt	HMVEC-LLy	blood_vessel	footprints	Footprints
24	0.0001	2.65079	0.107656	0.974857	0.605947	-0.212798	2.16251	4	1364	36	42264	23	HMVEC-LLy_footprints.txt	HMVEC-LLy	blood_vessel	footprints	Footprints
24	1e-06	1.3534e-06	0.998335	-13.5129	6475.23	-12705	12677.9	0	1364	3	42264	23	HMVEC-LLy_footprints.txt	HMVEC-LLy	blood_vessel	footprints	Footprints
24	1e-08	0.768148	0.999974	-0.263773	7988.09	-15656.9	15656.4	0	1364	2	42264	23	HMVEC-LLy_footprints.txt	HMVEC-LLy	blood_vessel	footprints	Footprints
24	1e-10	1	1	-2.31944e-16	10854.4	-21274.7	21274.7	0	1364	0	42264	23	HMVEC-LLy_footprints.txt	HMVEC-LLy	blood_vessel	footprints	Footprints
24	1e-12	1	1	-2.31944e-16	10854.4	-21274.7	21274.7	0	1364	0	42264	23	HMVEC-LLy_footprints.txt	HMVEC-LLy	blood_vessel	footprints	Footprints
24	1e-14	1	1	-2.31944e-16	10854.4	-21274.7	21274.7	0	1364	0	42264	23	HMVEC-LLy_footprints.txt	HMVEC-LLy	blood_vessel	footprints	Footprints
24	1e-16	1	1	-2.31944e-16	10854.4	-21274.7	21274.7	0	1364	0	42264	23	HMVEC-LLy_footprints.txt	HMVEC-LLy	blood_vessel	footprints	Footprints
24	1e-18	1	1	-2.31944e-16	10854.4	-21274.7	21274.7	0	1364	0	42264	23	HMVEC-LLy_footprints.txt	HMVEC-LLy	blood_vessel	footprints	Footprints
24	1e-20	1	1	-2.31944e-16	10854.4	-21274.7	21274.7	0	1364	0	42264	23	HMVEC-LLy_footprints.txt	HMVEC-LLy	blood_vessel	footprints	Footprints
25	0.01	1.57069	0.00970635	0.451515	0.174592	0.109315	0.793714	45	1720	750	42264	24	HPAF_footprints.txt	HPAF	blood_vessel	footprints	Footprints
25	0.0001	2.9202	0.0605967	1.07165	0.571113	-0.0477297	2.19103	5	1720	36	42264	24	HPAF_footprints.txt	HPAF	blood_vessel	footprints	Footprints
25	1e-06	8.94477e-07	0.99811	-13.927	5879.76	-11538.3	11510.4	0	1720	3	42264	24	HPAF_footprints.txt	HPAF	blood_vessel	footprints	Footprints
25	1e-08	1.64343e-06	0.998115	-13.3187	5637.99	-11063.8	11037.1	0	1720	2	42264	24	HPAF_footprints.txt	HPAF	blood_vessel	footprints	Footprints
25	1e-10	1	1	-1.44011e-16	9929.79	-19462.4	19462.4	0	1720	0	42264	24	HPAF_footprints.txt	HPAF	blood_vessel	footprints	Footprints
25	1e-12	1	1	-1.44011e-16	9929.79	-19462.4	19462.4	0	1720	0	42264	24	HPAF_footprints.txt	HPAF	blood_vessel	footprints	Footprints
25	1e-14	1	1	-1.44011e-16	9929.79	-19462.4	19462.4	0	1720	0	42264	24	HPAF_footprints.txt	HPAF	blood_vessel	footprints	Footprints
25	1e-16	1	1	-1.44011e-16	9929.79	-19462.4	19462.4	0	1720	0	42264	24	HPAF_footprints.txt	HPAF	blood_vessel	footprints	Footprints
25	1e-18	1	1	-1.44011e-16	9929.79	-19462.4	19462.4	0	1720	0	42264	24	HPAF_footprints.txt	HPAF	blood_vessel	footprints	Footprints
25	1e-20	1	1	-1.44011e-16	9929.79	-19462.4	19462.4	0	1720	0	42264	24	HPAF_footprints.txt	HPAF	blood_vessel	footprints	Footprints
26	0.01	1.61651	0.00308853	0.480271	0.16232	0.162123	0.798418	52	2027	750	42264	25	HPdLF_footprints.txt	HPdLF	epithelium	footprints	Footprints
26	0.0001	1.75672	0.352533	0.563448	0.606063	-0.624434	1.75133	4	2027	36	42264	25	HPdLF_footprints.txt	HPdLF	epithelium	footprints	Footprints
26	1e-06	7.72225e-07	0.997937	-14.074	5442.28	-10680.9	10652.8	0	2027	3	42264	25	HPdLF_footprints.txt	HPdLF	epithelium	footprints	Footprints
26	1e-08	2.94748e-06	0.998032	-12.7346	5162.14	-10130.5	10105.1	0	2027	2	42264	25	HPdLF_footprints.txt	HPdLF	epithelium	footprints	Footprints
26	1e-10	1	1	-7.7861e-17	9240.95	-18112.3	18112.3	0	2027	0	42264	25	HPdLF_footprints.txt	HPdLF	epithelium	footprints	Footprints
26	1e-12	1	1	-7.7861e-17	9240.95	-18112.3	18112.3	0	2027	0	42264	25	HPdLF_footprints.txt	HPdLF	epithelium	footprints	Footprints
26	1e-14	1	1	-7.7861e-17	9240.95	-18112.3	18112.3	0	2027	0	42264	25	HPdLF_footprints.txt	HPdLF	epithelium	footprints	Footprints
26	1e-16	1	1	-7.7861e-17	9240.95	-18112.3	18112.3	0	2027	0	42264	25	HPdLF_footprints.txt	HPdLF	epithelium	footprints	Footprints
26	1e-18	1	1	-7.7861e-17	9240.95	-18112.3	18112.3	0	2027	0	42264	25	HPdLF_footprints.txt	HPdLF	epithelium	footprints	Footprints
26	1e-20	1	1	-7.7861e-17	9240.95	-18112.3	18112.3	0	2027	0	42264	25	HPdLF_footprints.txt	HPdLF	epithelium	footprints	Footprints
27	0.01	1.37224	0.0781435	0.316443	0.179638	-0.0356472	0.668533	41	1789	750	42264	26	HPF_footprints.txt	HPF	lung	footprints	Footprints
27	0.0001	2.86613	0.065725	1.05296	0.57217	-0.0684918	2.17441	5	1789	36	42264	26	HPF_footprints.txt	HPF	lung	footprints	Footprints
27	1e-06	8.15007e-07	0.998064	-14.0201	5777.01	-11337	11308.9	0	1789	3	42264	26	HPF_footprints.txt	HPF	lung	footprints	Footprints
27	1e-08	1.7095e-06	0.998083	-13.2793	5527.97	-10848.1	10821.5	0	1789	2	42264	26	HPF_footprints.txt	HPF	lung	footprints	Footprints
27	1e-10	1	1	-9.09442e-17	9799.56	-19207.1	19207.1	0	1789	0	42264	26	HPF_footprints.txt	HPF	lung	footprints	Footprints
27	1e-12	1	1	-9.09442e-17	9799.56	-19207.1	19207.1	0	1789	0	42264	26	HPF_footprints.txt	HPF	lung	footprints	Footprints
27	1e-14	1	1	-9.09442e-17	9799.56	-19207.1	19207.1	0	1789	0	42264	26	HPF_footprints.txt	HPF	lung	footprints	Footprints
27	1e-16	1	1	-9.09442e-17	9799.56	-19207.1	19207.1	0	1789	0	42264	26	HPF_footprints.txt	HPF	lung	footprints	Footprints
27	1e-18	1	1	-9.09442e-17	9799.56	-19207.1	19207.1	0	1789	0	42264	26	HPF_footprints.txt	HPF	lung	footprints	Footprints
27	1e-20	1	1	-9.09442e-17	9799.56	-19207.1	19207.1	0	1789	0	42264	26	HPF_footprints.txt	HPF	lung	footprints	Footprints
28	0.01	1.14107	0.474682	0.131966	0.184598	-0.229846	0.493778	38	1956	750	42264	27	HRCEpiC_footprints.txt	HRCEpiC	epithelium	footprints	Footprints
28	0.0001	1.88845	0.296174	0.635754	0.608568	-0.557039	1.82855	4	1956	36	42264	27	HRCEpiC_footprints.txt	HRCEpiC	epithelium	footprints	Footprints
28	1e-06	2.50214e-06	0.99813	-12.8984	5503.44	-10799.6	10773.8	0	1956	3	42264	27	HRCEpiC_footprints.txt	HRCEpiC	epithelium	footprints	Footprints
28	1e-08	0.600166	0.999942	-0.510548	7069.73	-13857.2	13856.2	0	1956	2	42264	27	HRCEpiC_footprints.txt	HRCEpiC	epithelium	footprints	Footprints
28	1e-10	1	1	-1.45336e-16	9453.34	-18528.5	18528.5	0	1956	0	42264	27	HRCEpiC_footprints.txt	HRCEpiC	epithelium	footprints	Footprints
28	1e-12	1	1	-1.45336e-16	9453.34	-18528.5	18528.5	0	1956	0	42264	27	HRCEpiC_footprints.txt	HRCEpiC	epithelium	footprints	Footprints
28	1e-14	1	1	-1.45336e-16	9453.34	-18528.5	18528.5	0	1956	0	42264	27	HRCEpiC_footprints.txt	HRCEpiC	epithelium	footprints	Footprints
28	1e-16	1	1	-1.45336e-16	9453.34	-18528.5	18528.5	0	1956	0	42264	27	HRCEpiC_footprints.txt	HRCEpiC	epithelium	footprints	Footprints
28	1e-18	1	1	-1.45336e-16	9453.34	-18528.5	18528.5	0	1956	0	42264	27	HRCEpiC_footprints.txt	HRCEpiC	epithelium	footprints	Footprints
28	1e-20	1	1	-1.45336e-16	9453.34	-18528.5	18528.5	0	1956	0	42264	27	HRCEpiC_footprints.txt	HRCEpiC	epithelium	footprints	Footprints
29	0.01	1.53032	0.00613569	0.425475	0.155258	0.121169	0.72978	60	2413	750	42264	28	HSMM_footprints.txt	HSMM	muscle	footprints	Footprints
29	0.0001	2.77191	0.0609455	1.01954	0.544075	-0.0468499	2.08592	6	2413	36	42264	28	HSMM_footprints.txt	HSMM	muscle	footprints	Footprints
29	1e-06	1.14918e-06	0.997818	-13.6765	5000.86	-9815.36	9788.01	0	2413	3	42264	28	HSMM_footprints.txt	HSMM	muscle	footprints	Footprints
29	1e-08	3.46153e-06	0.997894	-12.5738	4763.45	-9348.93	9323.78	0	2413	2	42264	28	HSMM_footprints.txt	HSMM	muscle	footprints	Footprints
29	1e-10	1	1	-1.31515e-16	8612.08	-16879.7	16879.7	0	2413	0	42264	28	HSMM_footprints.txt	HSMM	muscle	footprints	Footprints
29	1e-12	1	1	-1.31515e-16	8612.08	-16879.7	16879.7	0	2413	0	42264	28	HSMM_footprints.txt	HSMM	muscle	footprints	Footprints
29	1e-14	1	1	-1.31515e-16	8612.08	-16879.7	16879.7	0	2413	0	42264	28	HSMM_footprints.txt	HSMM	muscle	footprints	Footprints
29	1e-16	1	1	-1.31515e-16	8612.08	-16879.7	16879.7	0	2413	0	42264	28	HSMM_footprints.txt	HSMM	muscle	footprints	Footprints
29	1e-18	1	1	-1.31515e-16	8612.08	-16879.7	16879.7	0	2413	0	42264	28	HSMM_footprints.txt	HSMM	muscle	footprints	Footprints
29	1e-20	1	1	-1.31515e-16	8612.08	-16879.7	16879.7	0	2413	0	42264	28	HSMM_footprints.txt	HSMM	muscle	footprints	Footprints
30	0.01	1.4692	0.0255042	0.384715	0.172234	0.0471369	0.722294	45	1864	750	42264	29	HVMF_footprints.txt	HVMF	connective	footprints	Footprints
30	0.0001	1.89942	0.290485	0.641549	0.606919	-0.548013	1.83111	4	1864	36	42264	29	HVMF_footprints.txt	HVMF	connective	footprints	Footprints
30	1e-06	9.16787e-07	0.998031	-13.9024	5633.79	-11056.1	11028.3	0	1864	3	42264	29	HVMF_footprints.txt	HVMF	connective	footprints	Footprints
30	1e-08	1.32909e-06	0.998009	-13.531	5423.05	-10642.7	10615.6	0	1864	2	42264	29	HVMF_footprints.txt	HVMF	connective	footprints	Footprints
30	1e-10	1	1	-9.74949e-17	9555.56	-18728.9	18728.9	0	1864	0	42264	29	HVMF_footprints.txt	HVMF	connective	footprints	Footprints
30	1e-12	1	1	-9.74949e-17	9555.56	-18728.9	18728.9	0	1864	0	42264	29	HVMF_footprints.txt	HVMF	connective	footprints	Footprints
30	1e-14	1	1	-9.74949e-17	9555.56	-18728.9	18728.9	0	1864	0	42264	29	HVMF_footprints.txt	HVMF	connective	footprints	Footprints
30	1e-16	1	1	-9.74949e-17	9555.56	-18728.9	18728.9	0	1864	0	42264	29	HVMF_footprints.txt	HVMF	connective	footprints	Footprints
30	1e-18	1	1	-9.74949e-17	9555.56	-18728.9	18728.9	0	1864	0	42264	29	HVMF_footprints.txt	HVMF	connective	footprints	Footprints
30	1e-20	1	1	-9.74949e-17	9555.56	-18728.9	18728.9	0	1864	0	42264	29	HVMF_footprints.txt	HVMF	connective	footprints	Footprints
31	0.01	1.14937	0.480576	0.139216	0.197364	-0.247617	0.526049	32	1605	750	42264	30	IMR90_footprints.txt	IMR90	lung	footprints	Footprints
31	0.0001	3.17886	0.0449432	1.15652	0.576767	0.0260614	2.28699	5	1605	36	42264	30	IMR90_footprints.txt	IMR90	lung	footprints	Footprints
31	1e-06	1.05929e-06	0.998181	-13.7579	6034.14	-11840.7	11813.2	0	1605	3	42264	30	IMR90_footprints.txt	IMR90	lung	footprints	Footprints
31	1e-08	2.36857e-06	0.998205	-12.9532	5758.53	-11299.7	11273.8	0	1605	2	42264	30	IMR90_footprints.txt	IMR90	lung	footprints	Footprints
31	1e-10	1	1	-1.50006e-16	10196.9	-19986	19986	0	1605	0	42264	30	IMR90_footprints.txt	IMR90	lung	footprints	Footprints
31	1e-12	1	1	-1.50006e-16	10196.9	-19986	19986	0	1605	0	42264	30	IMR90_footprints.txt	IMR90	lung	footprints	Footprints
31	1e-14	1	1	-1.50006e-16	10196.9	-19986	19986	0	1605	0	42264	30	IMR90_footprints.txt	IMR90	lung	footprints	Footprints
31	1e-16	1	1	-1.50006e-16	10196.9	-19986	19986	0	1605	0	42264	30	IMR90_footprints.txt	IMR90	lung	footprints	Footprints
31	1e-18	1	1	-1.50006e-16	10196.9	-19986	19986	0	1605	0	42264	30	IMR90_footprints.txt	IMR90	lung	footprints	Footprints
31	1e-20	1	1	-1.50006e-16	10196.9	-19986	19986	0	1605	0	42264	30	IMR90_footprints.txt	IMR90	lung	footprints	Footprints
32	0.01	1.62662	0.0343591	0.486502	0.229934	0.0358311	0.937173	23	789	750	42264	31	K562_footprints.txt	K562	blood	footprints	Footprints
32	0.0001	4.65816	0.0111459	1.53862	0.606212	0.350446	2.7268	4	789	36	42264	31	K562_footprints.txt	K562	blood	footprints	Footprints
32	1e-06	0.73796	0.999977	-0.303866	10619.4	-20814.3	20813.7	0	789	3	42264	31	K562_footprints.txt	K562	blood	footprints	Footprints
32	1e-08	0.855526	0.999988	-0.156039	10131.5	-19857.8	19857.5	0	789	2	42264	31	K562_footprints.txt	K562	blood	footprints	Footprints
32	1e-10	1	1	-1.38764e-16	13718	-26887.3	26887.3	0	789	0	42264	31	K562_footprints.txt	K562	blood	footprints	Footprints
32	1e-12	1	1	-1.38764e-16	13718	-26887.3	26887.3	0	789	0	42264	31	K562_footprints.txt	K562	blood	footprints	Footprints
32	1e-14	1	1	-1.38764e-16	13718	-26887.3	26887.3	0	789	0	42264	31	K562_footprints.txt	K562	blood	footprints	Footprints
32	1e-16	1	1	-1.38764e-16	13718	-26887.3	26887.3	0	789	0	42264	31	K562_footprints.txt	K562	blood	footprints	Footprints
32	1e-18	1	1	-1.38764e-16	13718	-26887.3	26887.3	0	789	0	42264	31	K562_footprints.txt	K562	blood	footprints	Footprints
32	1e-20	1	1	-1.38764e-16	13718	-26887.3	26887.3	0	789	0	42264	31	K562_footprints.txt	K562	blood	footprints	Footprints
33	0.01	1.24003	0.269242	0.215134	0.194725	-0.166527	0.596794	36	1521	750	42264	32	NB4_footprints.txt	NB4	blood	footprints	Footprints
33	0.0001	1.53457	0.520645	0.428248	0.666688	-0.878461	1.73496	3	1521	36	42264	32	NB4_footprints.txt	NB4	blood	footprints	Footprints
33	1e-06	2.56513e-06	0.998295	-12.8735	6026.13	-11824.1	11798.3	0	1521	3	42264	32	NB4_footprints.txt	NB4	blood	footprints	Footprints
33	1e-08	4.73356e-06	0.998304	-12.2608	5767.45	-11316.5	11291.9	0	1521	2	42264	32	NB4_footprints.txt	NB4	blood	footprints	Footprints
33	1e-10	1	1	-1.28104e-16	10301.6	-20191.1	20191.1	0	1521	0	42264	32	NB4_footprints.txt	NB4	blood	footprints	Footprints
33	1e-12	1	1	-1.28104e-16	10301.6	-20191.1	20191.1	0	1521	0	42264	32	NB4_footprints.txt	NB4	blood	footprints	Footprints
33	1e-14	1	1	-1.28104e-16	10301.6	-20191.1	20191.1	0	1521	0	42264	32	NB4_footprints.txt	NB4	blood	footprints	Footprints
33	1e-16	1	1	-1.28104e-16	10301.6	-20191.1	20191.1	0	1521	0	42264	32	NB4_footprints.txt	NB4	blood	footprints	Footprints
33	1e-18	1	1	-1.28104e-16	10301.6	-20191.1	20191.1	0	1521	0	42264	32	NB4_footprints.txt	NB4	blood	footprints	Footprints
33	1e-20	1	1	-1.28104e-16	10301.6	-20191.1	20191.1	0	1521	0	42264	32	NB4_footprints.txt	NB4	blood	footprints	Footprints
34	0.01	1.42401	0.0562934	0.353478	0.185188	-0.00948952	0.716446	37	1600	750	42264	33	NH-A_footprints.txt	NH-A	nervous	footprints	Footprints
34	0.0001	1.57295	0.498453	0.452953	0.669133	-0.858548	1.76445	3	1600	36	42264	33	NH-A_footprints.txt	NH-A	nervous	footprints	Footprints
34	1e-06	7.18107e-07	0.998166	-14.1466	6154.45	-12076.9	12048.6	0	1600	3	42264	33	NH-A_footprints.txt	NH-A	nervous	footprints	Footprints
34	1e-08	1.51061e-06	0.998181	-13.403	5880.63	-11539.4	11512.6	0	1600	2	42264	33	NH-A_footprints.txt	NH-A	nervous	footprints	Footprints
34	1e-10	1	1	-7.74486e-17	10264.9	-20119.2	20119.2	0	1600	0	42264	33	NH-A_footprints.txt	NH-A	nervous	footprints	Footprints
34	1e-12	1	1	-7.74486e-17	10264.9	-20119.2	20119.2	0	1600	0	42264	33	NH-A_footprints.txt	NH-A	nervous	footprints	Footprints
34	1e-14	1	1	-7.74486e-17	10264.9	-20119.2	20119.2	0	1600	0	42264	33	NH-A_footprints.txt	NH-A	nervous	footprints	Footprints
34	1e-16	1	1	-7.74486e-17	10264.9	-20119.2	20119.2	0	1600	0	42264	33	NH-A_footprints.txt	NH-A	nervous	footprints	Footprints
34	1e-18	1	1	-7.74486e-17	10264.9	-20119.2	20119.2	0	1600	0	42264	33	NH-A_footprints.txt	NH-A	nervous	footprints	Footprints
34	1e-20	1	1	-7.74486e-17	10264.9	-20119.2	20119.2	0	1600	0	42264	33	NH-A_footprints.txt	NH-A	nervous	footprints	Footprints
35	0.01	1.37988	0.0524868	0.321994	0.166052	-0.0034672	0.647455	51	2169	750	42264	34	NHDF-Ad_footprints.txt	NHDF-Ad	skin	footprints	Footprints
35	0.0001	2.35474	0.132309	0.85643	0.569034	-0.258876	1.97174	5	2169	36	42264	34	NHDF-Ad_footprints.txt	NHDF-Ad	skin	footprints	Footprints
35	1e-06	6.89138e-07	0.997855	-14.1878	5277.36	-10357.8	10329.4	0	2169	3	42264	34	NHDF-Ad_footprints.txt	NHDF-Ad	skin	footprints	Footprints
35	1e-08	1.54674e-06	0.997876	-13.3794	5027.03	-9866.37	9839.61	0	2169	2	42264	34	NHDF-Ad_footprints.txt	NHDF-Ad	skin	footprints	Footprints
35	1e-10	1	1	-1.43066e-16	8995.65	-17631.5	17631.5	0	2169	0	42264	34	NHDF-Ad_footprints.txt	NHDF-Ad	skin	footprints	Footprints
35	1e-12	1	1	-1.43066e-16	8995.65	-17631.5	17631.5	0	2169	0	42264	34	NHDF-Ad_footprints.txt	NHDF-Ad	skin	footprints	Footprints
35	1e-14	1	1	-1.43066e-16	8995.65	-17631.5	17631.5	0	2169	0	42264	34	NHDF-Ad_footprints.txt	NHDF-Ad	skin	footprints	Footprints
35	1e-16	1	1	-1.43066e-16	8995.65	-17631.5	17631.5	0	2169	0	42264	34	NHDF-Ad_footprints.txt	NHDF-Ad	skin	footprints	Footprints
35	1e-18	1	1	-1.43066e-16	8995.65	-17631.5	17631.5	0	2169	0	42264	34	NHDF-Ad_footprints.txt	NHDF-Ad	skin	footprints	Footprints
35	1e-20	1	1	-1.43066e-16	8995.65	-17631.5	17631.5	0	2169	0	42264	34	NHDF-Ad_footprints.txt	NHDF-Ad	skin	footprints	Footprints
36	0.01	1.81125	0.000101214	0.594015	0.152795	0.294537	0.893493	63	2236	750	42264	35	NHDF-neo_footprints.txt	NHDF-neo	skin	footprints	Footprints
36	0.0001	3.11381	0.0366188	1.13585	0.543471	0.0706451	2.20105	7	2236	36	42264	35	NHDF-neo_footprints.txt	NHDF-neo	skin	footprints	Footprints
36	1e-06	6.04e-07	0.997814	-14.3197	5226.04	-10257.4	10228.7	0	2236	3	42264	35	NHDF-neo_footprints.txt	NHDF-neo	skin	footprints	Footprints
36	1e-08	1.03823e-06	0.997801	-13.778	4998.1	-9810.06	9782.5	0	2236	2	42264	35	NHDF-neo_footprints.txt	NHDF-neo	skin	footprints	Footprints
36	1e-10	1	1	-9.53941e-17	8913.03	-17469.5	17469.5	0	2236	0	42264	35	NHDF-neo_footprints.txt	NHDF-neo	skin	footprints	Footprints
36	1e-12	1	1	-9.53941e-17	8913.03	-17469.5	17469.5	0	2236	0	42264	35	NHDF-neo_footprints.txt	NHDF-neo	skin	footprints	Footprints
36	1e-14	1	1	-9.53941e-17	8913.03	-17469.5	17469.5	0	2236	0	42264	35	NHDF-neo_footprints.txt	NHDF-neo	skin	footprints	Footprints
36	1e-16	1	1	-9.53941e-17	8913.03	-17469.5	17469.5	0	2236	0	42264	35	NHDF-neo_footprints.txt	NHDF-neo	skin	footprints	Footprints
36	1e-18	1	1	-9.53941e-17	8913.03	-17469.5	17469.5	0	2236	0	42264	35	NHDF-neo_footprints.txt	NHDF-neo	skin	footprints	Footprints
36	1e-20	1	1	-9.53941e-17	8913.03	-17469.5	17469.5	0	2236	0	42264	35	NHDF-neo_footprints.txt	NHDF-neo	skin	footprints	Footprints
37	0.01	1.09522	0.600295	0.0909542	0.173584	-0.249271	0.43118	44	2337	750	42264	36	NHLF_footprints.txt	NHLF	lung	footprints	Footprints
37	0.0001	1.01243	0.985261	0.0123512	0.668602	-1.29811	1.32281	3	2337	36	42264	36	NHLF_footprints.txt	NHLF	lung	footprints	Footprints
37	1e-06	1.6926e-06	0.997884	-13.2892	5011.2	-9835.23	9808.66	0	2337	3	42264	36	NHLF_footprints.txt	NHLF	lung	footprints	Footprints
37	1e-08	2.23382e-06	0.997853	-13.0118	4835.89	-9491.35	9465.33	0	2337	2	42264	36	NHLF_footprints.txt	NHLF	lung	footprints	Footprints
37	1e-10	1	1	-8.73634e-17	8738.07	-17126.6	17126.6	0	2337	0	42264	36	NHLF_footprints.txt	NHLF	lung	footprints	Footprints
37	1e-12	1	1	-8.73634e-17	8738.07	-17126.6	17126.6	0	2337	0	42264	36	NHLF_footprints.txt	NHLF	lung	footprints	Footprints
37	1e-14	1	1	-8.73634e-17	8738.07	-17126.6	17126.6	0	2337	0	42264	36	NHLF_footprints.txt	NHLF	lung	footprints	Footprints
37	1e-16	1	1	-8.73634e-17	8738.07	-17126.6	17126.6	0	2337	0	42264	36	NHLF_footprints.txt	NHLF	lung	footprints	Footprints
37	1e-18	1	1	-8.73634e-17	8738.07	-17126.6	17126.6	0	2337	0	42264	36	NHLF_footprints.txt	NHLF	lung	footprints	Footprints
37	1e-20	1	1	-8.73634e-17	8738.07	-17126.6	17126.6	0	2337	0	42264	36	NHLF_footprints.txt	NHLF	lung	footprints	Footprints
38	0.01	1.18042	0.352498	0.165867	0.178399	-0.183794	0.515529	43	2105	750	42264	37	SAEC_footprints.txt	SAEC	epithelium	footprints	Footprints
38	0.0001	1.74164	0.365451	0.554827	0.61305	-0.646752	1.75641	4	2105	36	42264	37	SAEC_footprints.txt	SAEC	epithelium	footprints	Footprints
38	1e-06	5.79579e-06	0.998154	-12.0584	5212.21	-10228	10203.9	0	2105	3	42264	37	SAEC_footprints.txt	SAEC	epithelium	footprints	Footprints
38	1e-08	6.18869e-06	0.998103	-11.9928	5044.04	-9898.31	9874.33	0	2105	2	42264	37	SAEC_footprints.txt	SAEC	epithelium	footprints	Footprints
38	1e-10	1	1	-1.35121e-16	9244.04	-18118.3	18118.3	0	2105	0	42264	37	SAEC_footprints.txt	SAEC	epithelium	footprints	Footprints
38	1e-12	1	1	-1.35121e-16	9244.04	-18118.3	18118.3	0	2105	0	42264	37	SAEC_footprints.txt	SAEC	epithelium	footprints	Footprints
38	1e-14	1	1	-1.35121e-16	9244.04	-18118.3	18118.3	0	2105	0	42264	37	SAEC_footprints.txt	SAEC	epithelium	footprints	Footprints
38	1e-16	1	1	-1.35121e-16	9244.04	-18118.3	18118.3	0	2105	0	42264	37	SAEC_footprints.txt	SAEC	epithelium	footprints	Footprints
38	1e-18	1	1	-1.35121e-16	9244.04	-18118.3	18118.3	0	2105	0	42264	37	SAEC_footprints.txt	SAEC	epithelium	footprints	Footprints
38	1e-20	1	1	-1.35121e-16	9244.04	-18118.3	18118.3	0	2105	0	42264	37	SAEC_footprints.txt	SAEC	epithelium	footprints	Footprints
39	0.01	0.972672	0.864843	-0.0277083	0.162786	-0.346769	0.291353	51	3050	750	42264	38	SKMC_footprints.txt	SKMC	muscle	footprints	Footprints
39	0.0001	1.14227	0.826288	0.133022	0.606118	-1.05497	1.32101	4	3050	36	42264	38	SKMC_footprints.txt	SKMC	muscle	footprints	Footprints
39	1e-06	7.01296e-07	0.997494	-14.1703	4511.05	-8855.83	8827.49	0	3050	3	42264	38	SKMC_footprints.txt	SKMC	muscle	footprints	Footprints
39	1e-08	2.13112e-06	0.997567	-13.0589	4282.7	-8407.14	8381.02	0	3050	2	42264	38	SKMC_footprints.txt	SKMC	muscle	footprints	Footprints
39	1e-10	1	1	-1.32943e-16	7882.17	-15449.1	15449.1	0	3050	0	42264	38	SKMC_footprints.txt	SKMC	muscle	footprints	Footprints
39	1e-12	1	1	-1.32943e-16	7882.17	-15449.1	15449.1	0	3050	0	42264	38	SKMC_footprints.txt	SKMC	muscle	footprints	Footprints
39	1e-14	1	1	-1.32943e-16	7882.17	-15449.1	15449.1	0	3050	0	42264	38	SKMC_footprints.txt	SKMC	muscle	footprints	Footprints
39	1e-16	1	1	-1.32943e-16	7882.17	-15449.1	15449.1	0	3050	0	42264	38	SKMC_footprints.txt	SKMC	muscle	footprints	Footprints
39	1e-18	1	1	-1.32943e-16	7882.17	-15449.1	15449.1	0	3050	0	42264	38	SKMC_footprints.txt	SKMC	muscle	footprints	Footprints
39	1e-20	1	1	-1.32943e-16	7882.17	-15449.1	15449.1	0	3050	0	42264	38	SKMC_footprints.txt	SKMC	muscle	footprints	Footprints
40	0.01	1.63765	0.032322	0.493263	0.230453	0.0415751	0.944951	24	824	750	42264	39	SK-N-SH_RA_footprints.txt	SK-N-SH	brain	footprints	Footprints
40	0.0001	3.17209	0.0862085	1.15439	0.672821	-0.164339	2.47312	3	824	36	42264	39	SK-N-SH_RA_footprints.txt	SK-N-SH	brain	footprints	Footprints
40	1e-06	1.1062e-06	0.998678	-13.7146	8277.02	-16236.7	16209.2	0	824	3	42264	39	SK-N-SH_RA_footprints.txt	SK-N-SH	brain	footprints	Footprints
40	1e-08	0.802522	0.999983	-0.219996	10044.5	-19687.4	19687	0	824	2	42264	39	SK-N-SH_RA_footprints.txt	SK-N-SH	brain	footprints	Footprints
40	1e-10	1	1	-5.07506e-17	13715.8	-26883	26883	0	824	0	42264	39	SK-N-SH_RA_footprints.txt	SK-N-SH	brain	footprints	Footprints
40	1e-12	1	1	-5.07506e-17	13715.8	-26883	26883	0	824	0	42264	39	SK-N-SH_RA_footprints.txt	SK-N-SH	brain	footprints	Footprints
40	1e-14	1	1	-5.07506e-17	13715.8	-26883	26883	0	824	0	42264	39	SK-N-SH_RA_footprints.txt	SK-N-SH	brain	footprints	Footprints
40	1e-16	1	1	-5.07506e-17	13715.8	-26883	26883	0	824	0	42264	39	SK-N-SH_RA_footprints.txt	SK-N-SH	brain	footprints	Footprints
40	1e-18	1	1	-5.07506e-17	13715.8	-26883	26883	0	824	0	42264	39	SK-N-SH_RA_footprints.txt	SK-N-SH	brain	footprints	Footprints
40	1e-20	1	1	-5.07506e-17	13715.8	-26883	26883	0	824	0	42264	39	SK-N-SH_RA_footprints.txt	SK-N-SH	brain	footprints	Footprints
41	0.01	1.78506	0.010719	0.579454	0.227083	0.134371	1.02454	25	760	750	42264	40	Th1_footprints.txt	Th1	blood	footprints	Footprints
41	0.0001	1.82668	0.442373	0.602501	0.784311	-0.934749	2.13975	2	760	36	42264	40	Th1_footprints.txt	Th1	blood	footprints	Footprints
41	1e-06	3.29804e-06	0.998789	-12.6222	8316.18	-16312.3	16287.1	0	760	3	42264	40	Th1_footprints.txt	Th1	blood	footprints	Footprints
41	1e-08	0.949663	0.999996	-0.0516484	10205.5	-20002.8	20002.7	0	760	2	42264	40	Th1_footprints.txt	Th1	blood	footprints	Footprints
41	1e-10	1	1	-1.03843e-16	13954.8	-27351.4	27351.4	0	760	0	42264	40	Th1_footprints.txt	Th1	blood	footprints	Footprints
41	1e-12	1	1	-1.03843e-16	13954.8	-27351.4	27351.4	0	760	0	42264	40	Th1_footprints.txt	Th1	blood	footprints	Footprints
41	1e-14	1	1	-1.03843e-16	13954.8	-27351.4	27351.4	0	760	0	42264	40	Th1_footprints.txt	Th1	blood	footprints	Footprints
41	1e-16	1	1	-1.03843e-16	13954.8	-27351.4	27351.4	0	760	0	42264	40	Th1_footprints.txt	Th1	blood	footprints	Footprints
41	1e-18	1	1	-1.03843e-16	13954.8	-27351.4	27351.4	0	760	0	42264	40	Th1_footprints.txt	Th1	blood	footprints	Footprints
41	1e-20	1	1	-1.03843e-16	13954.8	-27351.4	27351.4	0	760	0	42264	40	Th1_footprints.txt	Th1	blood	footprints	Footprints
42	0.01	1.21851	0.0682796	0.19763	0.1084	-0.0148337	0.410093	169	8385	750	42264	41	A549-all.twopass.merge150.wgt10.zgt2.wig	A549	epithelium	hotspots	Hotspots
42	0.0001	1.63107	0.294792	0.489234	0.466974	-0.426036	1.4045	11	8385	36	42264	41	A549-all.twopass.merge150.wgt10.zgt2.wig	A549	epithelium	hotspots	Hotspots
42	1e-06	5.15405e-07	0.995812	-14.4783	2758.48	-5421.1	5392.15	0	8385	3	42264	41	A549-all.twopass.merge150.wgt10.zgt2.wig	A549	epithelium	hotspots	Hotspots
42	1e-08	1.29494e-06	0.995878	-13.557	2623.95	-5156.5	5129.38	0	8385	2	42264	41	A549-all.twopass.merge150.wgt10.zgt2.wig	A549	epithelium	hotspots	Hotspots
42	1e-10	1	1	-7.43755e-18	5325.99	-10438.9	10438.9	0	8385	0	42264	41	A549-all.twopass.merge150.wgt10.zgt2.wig	A549	epithelium	hotspots	Hotspots
42	1e-12	1	1	-7.43755e-18	5325.99	-10438.9	10438.9	0	8385	0	42264	41	A549-all.twopass.merge150.wgt10.zgt2.wig	A549	epithelium	hotspots	Hotspots
42	1e-14	1	1	-7.43755e-18	5325.99	-10438.9	10438.9	0	8385	0	42264	41	A549-all.twopass.merge150.wgt10.zgt2.wig	A549	epithelium	hotspots	Hotspots
42	1e-16	1	1	-7.43755e-18	5325.99	-10438.9	10438.9	0	8385	0	42264	41	A549-all.twopass.merge150.wgt10.zgt2.wig	A549	epithelium	hotspots	Hotspots
42	1e-18	1	1	-7.43755e-18	5325.99	-10438.9	10438.9	0	8385	0	42264	41	A549-all.twopass.merge150.wgt10.zgt2.wig	A549	epithelium	hotspots	Hotspots
42	1e-20	1	1	-7.43755e-18	5325.99	-10438.9	10438.9	0	8385	0	42264	41	A549-all.twopass.merge150.wgt10.zgt2.wig	A549	epithelium	hotspots	Hotspots
43	0.01	1.32966	0.00775982	0.284923	0.10702	0.0751648	0.494682	168	7593	750	42264	42	Adult_Th0_AllReps.30000000.twopass.merge150.wgt10.zgt2.wig	Adult_CD4+	blood	hotspots	Hotspots
43	0.0001	2.31086	0.0620571	0.83762	0.448912	-0.0422484	1.71749	12	7593	36	42264	42	Adult_Th0_AllReps.30000000.twopass.merge150.wgt10.zgt2.wig	Adult_CD4+	blood	hotspots	Hotspots
43	1e-06	7.99536e-07	0.996065	-14.0392	2846.47	-5593.12	5565.04	0	7593	3	42264	42	Adult_Th0_AllReps.30000000.twopass.merge150.wgt10.zgt2.wig	Adult_CD4+	blood	hotspots	Hotspots
43	1e-08	3.05859e-06	0.996238	-12.6976	2692.79	-5290.57	5265.18	0	7593	2	42264	42	Adult_Th0_AllReps.30000000.twopass.merge150.wgt10.zgt2.wig	Adult_CD4+	blood	hotspots	Hotspots
43	1e-10	1	1	-1.63375e-17	5364.92	-10515.2	10515.2	0	7593	0	42264	42	Adult_Th0_AllReps.30000000.twopass.merge150.wgt10.zgt2.wig	Adult_CD4+	blood	hotspots	Hotspots
43	1e-12	1	1	-1.63375e-17	5364.92	-10515.2	10515.2	0	7593	0	42264	42	Adult_Th0_AllReps.30000000.twopass.merge150.wgt10.zgt2.wig	Adult_CD4+	blood	hotspots	Hotspots
43	1e-14	1	1	-1.63375e-17	5364.92	-10515.2	10515.2	0	7593	0	42264	42	Adult_Th0_AllReps.30000000.twopass.merge150.wgt10.zgt2.wig	Adult_CD4+	blood	hotspots	Hotspots
43	1e-16	1	1	-1.63375e-17	5364.92	-10515.2	10515.2	0	7593	0	42264	42	Adult_Th0_AllReps.30000000.twopass.merge150.wgt10.zgt2.wig	Adult_CD4+	blood	hotspots	Hotspots
43	1e-18	1	1	-1.63375e-17	5364.92	-10515.2	10515.2	0	7593	0	42264	42	Adult_Th0_AllReps.30000000.twopass.merge150.wgt10.zgt2.wig	Adult_CD4+	blood	hotspots	Hotspots
43	1e-20	1	1	-1.63375e-17	5364.92	-10515.2	10515.2	0	7593	0	42264	42	Adult_Th0_AllReps.30000000.twopass.merge150.wgt10.zgt2.wig	Adult_CD4+	blood	hotspots	Hotspots
44	0.01	1.12509	0.34203	0.117865	0.124047	-0.125268	0.360997	118	5848	750	42264	43	AG04449-DS12319.twopass.merge150.wgt10.zgt2.wig	AG04449	skin	hotspots	Hotspots
44	0.0001	1.46375	0.451094	0.381	0.505578	-0.609933	1.37193	9	5848	36	42264	43	AG04449-DS12319.twopass.merge150.wgt10.zgt2.wig	AG04449	skin	hotspots	Hotspots
44	1e-06	4.94312e-07	0.996483	-14.5201	3293.97	-6470.71	6441.67	0	5848	3	42264	43	AG04449-DS12319.twopass.merge150.wgt10.zgt2.wig	AG04449	skin	hotspots	Hotspots
44	1e-08	9.5974e-07	0.996485	-13.8566	3145.53	-6179.1	6151.39	0	5848	2	42264	43	AG04449-DS12319.twopass.merge150.wgt10.zgt2.wig	AG04449	skin	hotspots	Hotspots
44	1e-10	1	1	8.38178e-18	6106.92	-11969.6	11969.6	0	5848	0	42264	43	AG04449-DS12319.twopass.merge150.wgt10.zgt2.wig	AG04449	skin	hotspots	Hotspots
44	1e-12	1	1	8.38178e-18	6106.92	-11969.6	11969.6	0	5848	0	42264	43	AG04449-DS12319.twopass.merge150.wgt10.zgt2.wig	AG04449	skin	hotspots	Hotspots
44	1e-14	1	1	8.38178e-18	6106.92	-11969.6	11969.6	0	5848	0	42264	43	AG04449-DS12319.twopass.merge150.wgt10.zgt2.wig	AG04449	skin	hotspots	Hotspots
44	1e-16	1	1	8.38178e-18	6106.92	-11969.6	11969.6	0	5848	0	42264	43	AG04449-DS12319.twopass.merge150.wgt10.zgt2.wig	AG04449	skin	hotspots	Hotspots
44	1e-18	1	1	8.38178e-18	6106.92	-11969.6	11969.6	0	5848	0	42264	43	AG04449-DS12319.twopass.merge150.wgt10.zgt2.wig	AG04449	skin	hotspots	Hotspots
44	1e-20	1	1	8.38178e-18	6106.92	-11969.6	11969.6	0	5848	0	42264	43	AG04449-DS12319.twopass.merge150.wgt10.zgt2.wig	AG04449	skin	hotspots	Hotspots
45	0.01	1.17141	0.207794	0.158206	0.125595	-0.08796	0.404373	102	5341	750	42264	44	AG04450-DS12270.twopass.merge150.wgt10.zgt2.wig	AG04450	lung	hotspots	Hotspots
45	0.0001	2.08985	0.132227	0.737093	0.489641	-0.222602	1.69679	9	5341	36	42264	44	AG04450-DS12270.twopass.merge150.wgt10.zgt2.wig	AG04450	lung	hotspots	Hotspots
45	1e-06	6.87776e-07	0.996679	-14.1898	3409.24	-6696.31	6667.93	0	5341	3	42264	44	AG04450-DS12270.twopass.merge150.wgt10.zgt2.wig	AG04450	lung	hotspots	Hotspots
45	1e-08	1.31134e-06	0.99669	-13.5445	3265.05	-6413.05	6385.96	0	5341	2	42264	44	AG04450-DS12270.twopass.merge150.wgt10.zgt2.wig	AG04450	lung	hotspots	Hotspots
45	1e-10	1	1	-2.53842e-17	6254.83	-12259.5	12259.5	0	5341	0	42264	44	AG04450-DS12270.twopass.merge150.wgt10.zgt2.wig	AG04450	lung	hotspots	Hotspots
45	1e-12	1	1	-2.53842e-17	6254.83	-12259.5	12259.5	0	5341	0	42264	44	AG04450-DS12270.twopass.merge150.wgt10.zgt2.wig	AG04450	lung	hotspots	Hotspots
45	1e-14	1	1	-2.53842e-17	6254.83	-12259.5	12259.5	0	5341	0	42264	44	AG04450-DS12270.twopass.merge150.wgt10.zgt2.wig	AG04450	lung	hotspots	Hotspots
45	1e-16	1	1	-2.53842e-17	6254.83	-12259.5	12259.5	0	5341	0	42264	44	AG04450-DS12270.twopass.merge150.wgt10.zgt2.wig	AG04450	lung	hotspots	Hotspots
45	1e-18	1	1	-2.53842e-17	6254.83	-12259.5	12259.5	0	5341	0	42264	44	AG04450-DS12270.twopass.merge150.wgt10.zgt2.wig	AG04450	lung	hotspots	Hotspots
45	1e-20	1	1	-2.53842e-17	6254.83	-12259.5	12259.5	0	5341	0	42264	44	AG04450-DS12270.twopass.merge150.wgt10.zgt2.wig	AG04450	lung	hotspots	Hotspots
46	0.01	1.27452	0.0426944	0.242567	0.119687	0.00798155	0.477153	125	5934	750	42264	45	AG09309-DS12352.twopass.merge150.wgt10.zgt2.wig	AG09309	skin	hotspots	Hotspots
46	0.0001	1.44128	0.46781	0.365532	0.503455	-0.62124	1.3523	9	5934	36	42264	45	AG09309-DS12352.twopass.merge150.wgt10.zgt2.wig	AG09309	skin	hotspots	Hotspots
46	1e-06	5.72427e-07	0.996491	-14.3734	3267.88	-6419.41	6390.67	0	5934	3	42264	45	AG09309-DS12352.twopass.merge150.wgt10.zgt2.wig	AG09309	skin	hotspots	Hotspots
46	1e-08	1.11817e-06	0.996499	-13.7038	3122.93	-6134.65	6107.24	0	5934	2	42264	45	AG09309-DS12352.twopass.merge150.wgt10.zgt2.wig	AG09309	skin	hotspots	Hotspots
46	1e-10	1	1	5.72249e-18	6044.66	-11847.5	11847.5	0	5934	0	42264	45	AG09309-DS12352.twopass.merge150.wgt10.zgt2.wig	AG09309	skin	hotspots	Hotspots
46	1e-12	1	1	5.72249e-18	6044.66	-11847.5	11847.5	0	5934	0	42264	45	AG09309-DS12352.twopass.merge150.wgt10.zgt2.wig	AG09309	skin	hotspots	Hotspots
46	1e-14	1	1	5.72249e-18	6044.66	-11847.5	11847.5	0	5934	0	42264	45	AG09309-DS12352.twopass.merge150.wgt10.zgt2.wig	AG09309	skin	hotspots	Hotspots
46	1e-16	1	1	5.72249e-18	6044.66	-11847.5	11847.5	0	5934	0	42264	45	AG09309-DS12352.twopass.merge150.wgt10.zgt2.wig	AG09309	skin	hotspots	Hotspots
46	1e-18	1	1	5.72249e-18	6044.66	-11847.5	11847.5	0	5934	0	42264	45	AG09309-DS12352.twopass.merge150.wgt10.zgt2.wig	AG09309	skin	hotspots	Hotspots
46	1e-20	1	1	5.72249e-18	6044.66	-11847.5	11847.5	0	5934	0	42264	45	AG09309-DS12352.twopass.merge150.wgt10.zgt2.wig	AG09309	skin	hotspots	Hotspots
47	0.01	1.36038	0.0151423	0.307763	0.126706	0.0594196	0.556106	105	4676	750	42264	46	AG09319-DS12291.twopass.merge150.wgt10.zgt2.wig	AG09319	gingival	hotspots	Hotspots
47	0.0001	1.96978	0.175496	0.677924	0.500404	-0.302868	1.65872	9	4676	36	42264	46	AG09319-DS12291.twopass.merge150.wgt10.zgt2.wig	AG09319	gingival	hotspots	Hotspots
47	1e-06	5.71886e-07	0.996871	-14.3743	3665.62	-7199	7170.25	0	4676	3	42264	46	AG09319-DS12291.twopass.merge150.wgt10.zgt2.wig	AG09319	gingival	hotspots	Hotspots
47	1e-08	1.40847e-06	0.996921	-13.473	3491.29	-6856.41	6829.46	0	4676	2	42264	46	AG09319-DS12291.twopass.merge150.wgt10.zgt2.wig	AG09319	gingival	hotspots	Hotspots
47	1e-10	1	1	1.40505e-17	6567.09	-12871.5	12871.5	0	4676	0	42264	46	AG09319-DS12291.twopass.merge150.wgt10.zgt2.wig	AG09319	gingival	hotspots	Hotspots
47	1e-12	1	1	1.40505e-17	6567.09	-12871.5	12871.5	0	4676	0	42264	46	AG09319-DS12291.twopass.merge150.wgt10.zgt2.wig	AG09319	gingival	hotspots	Hotspots
47	1e-14	1	1	1.40505e-17	6567.09	-12871.5	12871.5	0	4676	0	42264	46	AG09319-DS12291.twopass.merge150.wgt10.zgt2.wig	AG09319	gingival	hotspots	Hotspots
47	1e-16	1	1	1.40505e-17	6567.09	-12871.5	12871.5	0	4676	0	42264	46	AG09319-DS12291.twopass.merge150.wgt10.zgt2.wig	AG09319	gingival	hotspots	Hotspots
47	1e-18	1	1	1.40505e-17	6567.09	-12871.5	12871.5	0	4676	0	42264	46	AG09319-DS12291.twopass.merge150.wgt10.zgt2.wig	AG09319	gingival	hotspots	Hotspots
47	1e-20	1	1	1.40505e-17	6567.09	-12871.5	12871.5	0	4676	0	42264	46	AG09319-DS12291.twopass.merge150.wgt10.zgt2.wig	AG09319	gingival	hotspots	Hotspots
48	0.01	1.46497	0.00137866	0.381833	0.119357	0.147893	0.615772	120	5294	750	42264	47	AG10803-DS12384.twopass.merge150.wgt10.zgt2.wig	AG10803	skin	hotspots	Hotspots
48	0.0001	2.123	0.121246	0.752831	0.485834	-0.199403	1.70507	10	5294	36	42264	47	AG10803-DS12384.twopass.merge150.wgt10.zgt2.wig	AG10803	skin	hotspots	Hotspots
48	1e-06	5.43554e-07	0.996662	-14.4251	3448.2	-6772.89	6744.04	0	5294	3	42264	47	AG10803-DS12384.twopass.merge150.wgt10.zgt2.wig	AG10803	skin	hotspots	Hotspots
48	1e-08	1.18008e-06	0.996691	-13.6499	3291.38	-6464.76	6437.46	0	5294	2	42264	47	AG10803-DS12384.twopass.merge150.wgt10.zgt2.wig	AG10803	skin	hotspots	Hotspots
48	1e-10	1	1	1.65186e-17	6243.53	-12237.3	12237.3	0	5294	0	42264	47	AG10803-DS12384.twopass.merge150.wgt10.zgt2.wig	AG10803	skin	hotspots	Hotspots
48	1e-12	1	1	1.65186e-17	6243.53	-12237.3	12237.3	0	5294	0	42264	47	AG10803-DS12384.twopass.merge150.wgt10.zgt2.wig	AG10803	skin	hotspots	Hotspots
48	1e-14	1	1	1.65186e-17	6243.53	-12237.3	12237.3	0	5294	0	42264	47	AG10803-DS12384.twopass.merge150.wgt10.zgt2.wig	AG10803	skin	hotspots	Hotspots
48	1e-16	1	1	1.65186e-17	6243.53	-12237.3	12237.3	0	5294	0	42264	47	AG10803-DS12384.twopass.merge150.wgt10.zgt2.wig	AG10803	skin	hotspots	Hotspots
48	1e-18	1	1	1.65186e-17	6243.53	-12237.3	12237.3	0	5294	0	42264	47	AG10803-DS12384.twopass.merge150.wgt10.zgt2.wig	AG10803	skin	hotspots	Hotspots
48	1e-20	1	1	1.65186e-17	6243.53	-12237.3	12237.3	0	5294	0	42264	47	AG10803-DS12384.twopass.merge150.wgt10.zgt2.wig	AG10803	skin	hotspots	Hotspots
49	0.01	1.20171	0.12837	0.183745	0.120841	-0.053102	0.420593	119	5767	750	42264	48	AoAF-DS13523.twopass.merge150.wgt10.zgt2.wig	AoAF	blood_vessel	hotspots	Hotspots
49	0.0001	1.47245	0.437586	0.386927	0.498439	-0.590014	1.36387	9	5767	36	42264	48	AoAF-DS13523.twopass.merge150.wgt10.zgt2.wig	AoAF	blood_vessel	hotspots	Hotspots
49	1e-06	6.41746e-07	0.996548	-14.2591	3296.2	-6474.81	6446.3	0	5767	3	42264	48	AoAF-DS13523.twopass.merge150.wgt10.zgt2.wig	AoAF	blood_vessel	hotspots	Hotspots
49	1e-08	1.41524e-06	0.996581	-13.4682	3142.92	-6173.59	6146.65	0	5767	2	42264	48	AoAF-DS13523.twopass.merge150.wgt10.zgt2.wig	AoAF	blood_vessel	hotspots	Hotspots
49	1e-10	1	1	1.56781e-17	6039.08	-11836.6	11836.6	0	5767	0	42264	48	AoAF-DS13523.twopass.merge150.wgt10.zgt2.wig	AoAF	blood_vessel	hotspots	Hotspots
49	1e-12	1	1	1.56781e-17	6039.08	-11836.6	11836.6	0	5767	0	42264	48	AoAF-DS13523.twopass.merge150.wgt10.zgt2.wig	AoAF	blood_vessel	hotspots	Hotspots
49	1e-14	1	1	1.56781e-17	6039.08	-11836.6	11836.6	0	5767	0	42264	48	AoAF-DS13523.twopass.merge150.wgt10.zgt2.wig	AoAF	blood_vessel	hotspots	Hotspots
49	1e-16	1	1	1.56781e-17	6039.08	-11836.6	11836.6	0	5767	0	42264	48	AoAF-DS13523.twopass.merge150.wgt10.zgt2.wig	AoAF	blood_vessel	hotspots	Hotspots
49	1e-18	1	1	1.56781e-17	6039.08	-11836.6	11836.6	0	5767	0	42264	48	AoAF-DS13523.twopass.merge150.wgt10.zgt2.wig	AoAF	blood_vessel	hotspots	Hotspots
49	1e-20	1	1	1.56781e-17	6039.08	-11836.6	11836.6	0	5767	0	42264	48	AoAF-DS13523.twopass.merge150.wgt10.zgt2.wig	AoAF	blood_vessel	hotspots	Hotspots
50	0.01	1.04315	0.728048	0.0422408	0.121478	-0.195857	0.280338	125	6426	750	42264	49	BE_2_C-DS14625.twopass.merge150.wgt10.zgt2.wig	BE2_C	brain	hotspots	Hotspots
50	0.0001	1.75012	0.249283	0.559685	0.485799	-0.39248	1.51185	9	6426	36	42264	49	BE_2_C-DS14625.twopass.merge150.wgt10.zgt2.wig	BE2_C	brain	hotspots	Hotspots
50	1e-06	6.5603e-07	0.996381	-14.2371	3138.71	-6166.11	6137.64	0	6426	3	42264	49	BE_2_C-DS14625.twopass.merge150.wgt10.zgt2.wig	BE2_C	brain	hotspots	Hotspots
50	1e-08	1.42706e-06	0.996412	-13.4599	2993.04	-5879.82	5852.9	0	6426	2	42264	49	BE_2_C-DS14625.twopass.merge150.wgt10.zgt2.wig	BE2_C	brain	hotspots	Hotspots
50	1e-10	1	1	1.01009e-17	5877.81	-11520.5	11520.5	0	6426	0	42264	49	BE_2_C-DS14625.twopass.merge150.wgt10.zgt2.wig	BE2_C	brain	hotspots	Hotspots
50	1e-12	1	1	1.01009e-17	5877.81	-11520.5	11520.5	0	6426	0	42264	49	BE_2_C-DS14625.twopass.merge150.wgt10.zgt2.wig	BE2_C	brain	hotspots	Hotspots
50	1e-14	1	1	1.01009e-17	5877.81	-11520.5	11520.5	0	6426	0	42264	49	BE_2_C-DS14625.twopass.merge150.wgt10.zgt2.wig	BE2_C	brain	hotspots	Hotspots
50	1e-16	1	1	1.01009e-17	5877.81	-11520.5	11520.5	0	6426	0	42264	49	BE_2_C-DS14625.twopass.merge150.wgt10.zgt2.wig	BE2_C	brain	hotspots	Hotspots
50	1e-18	1	1	1.01009e-17	5877.81	-11520.5	11520.5	0	6426	0	42264	49	BE_2_C-DS14625.twopass.merge150.wgt10.zgt2.wig	BE2_C	brain	hotspots	Hotspots
50	1e-20	1	1	1.01009e-17	5877.81	-11520.5	11520.5	0	6426	0	42264	49	BE_2_C-DS14625.twopass.merge150.wgt10.zgt2.wig	BE2_C	brain	hotspots	Hotspots
51	0.01	1.28682	0.0366978	0.252171	0.120707	0.0155846	0.488758	122	5725	750	42264	50	BJ-DS10081.twopass.merge150.wgt10.zgt2.wig	BJ	skin	hotspots	Hotspots
51	0.0001	1.52114	0.403928	0.419458	0.50257	-0.565579	1.40449	9	5725	36	42264	50	BJ-DS10081.twopass.merge150.wgt10.zgt2.wig	BJ	skin	hotspots	Hotspots
51	1e-06	4.93368e-07	0.996526	-14.522	3335.74	-6552.57	6523.52	0	5725	3	42264	50	BJ-DS10081.twopass.merge150.wgt10.zgt2.wig	BJ	skin	hotspots	Hotspots
51	1e-08	1.08137e-06	0.996548	-13.7373	3175.62	-6237.96	6210.48	0	5725	2	42264	50	BJ-DS10081.twopass.merge150.wgt10.zgt2.wig	BJ	skin	hotspots	Hotspots
51	1e-10	1	1	-1.36119e-17	6113.92	-11983.3	11983.3	0	5725	0	42264	50	BJ-DS10081.twopass.merge150.wgt10.zgt2.wig	BJ	skin	hotspots	Hotspots
51	1e-12	1	1	-1.36119e-17	6113.92	-11983.3	11983.3	0	5725	0	42264	50	BJ-DS10081.twopass.merge150.wgt10.zgt2.wig	BJ	skin	hotspots	Hotspots
51	1e-14	1	1	-1.36119e-17	6113.92	-11983.3	11983.3	0	5725	0	42264	50	BJ-DS10081.twopass.merge150.wgt10.zgt2.wig	BJ	skin	hotspots	Hotspots
51	1e-16	1	1	-1.36119e-17	6113.92	-11983.3	11983.3	0	5725	0	42264	50	BJ-DS10081.twopass.merge150.wgt10.zgt2.wig	BJ	skin	hotspots	Hotspots
51	1e-18	1	1	-1.36119e-17	6113.92	-11983.3	11983.3	0	5725	0	42264	50	BJ-DS10081.twopass.merge150.wgt10.zgt2.wig	BJ	skin	hotspots	Hotspots
51	1e-20	1	1	-1.36119e-17	6113.92	-11983.3	11983.3	0	5725	0	42264	50	BJ-DS10081.twopass.merge150.wgt10.zgt2.wig	BJ	skin	hotspots	Hotspots
52	0.01	1.22959	0.10508	0.206678	0.127523	-0.0432673	0.456624	96	4483	750	42264	51	CACO2-DS8235.twopass.merge150.wgt10.zgt2.wig	Caco-2	colon	hotspots	Hotspots
52	0.0001	2.06432	0.132158	0.724801	0.481388	-0.21872	1.66832	9	4483	36	42264	51	CACO2-DS8235.twopass.merge150.wgt10.zgt2.wig	Caco-2	colon	hotspots	Hotspots
52	1e-06	8.52982e-07	0.99694	-13.9745	3644.22	-7156.65	7128.7	0	4483	3	42264	51	CACO2-DS8235.twopass.merge150.wgt10.zgt2.wig	Caco-2	colon	hotspots	Hotspots
52	1e-08	3.32777e-06	0.997064	-12.6132	3427.23	-6729.99	6704.76	0	4483	2	42264	51	CACO2-DS8235.twopass.merge150.wgt10.zgt2.wig	Caco-2	colon	hotspots	Hotspots
52	1e-10	1	1	-1.25089e-18	6456.5	-12654.7	12654.7	0	4483	0	42264	51	CACO2-DS8235.twopass.merge150.wgt10.zgt2.wig	Caco-2	colon	hotspots	Hotspots
52	1e-12	1	1	-1.25089e-18	6456.5	-12654.7	12654.7	0	4483	0	42264	51	CACO2-DS8235.twopass.merge150.wgt10.zgt2.wig	Caco-2	colon	hotspots	Hotspots
52	1e-14	1	1	-1.25089e-18	6456.5	-12654.7	12654.7	0	4483	0	42264	51	CACO2-DS8235.twopass.merge150.wgt10.zgt2.wig	Caco-2	colon	hotspots	Hotspots
52	1e-16	1	1	-1.25089e-18	6456.5	-12654.7	12654.7	0	4483	0	42264	51	CACO2-DS8235.twopass.merge150.wgt10.zgt2.wig	Caco-2	colon	hotspots	Hotspots
52	1e-18	1	1	-1.25089e-18	6456.5	-12654.7	12654.7	0	4483	0	42264	51	CACO2-DS8235.twopass.merge150.wgt10.zgt2.wig	Caco-2	colon	hotspots	Hotspots
52	1e-20	1	1	-1.25089e-18	6456.5	-12654.7	12654.7	0	4483	0	42264	51	CACO2-DS8235.twopass.merge150.wgt10.zgt2.wig	Caco-2	colon	hotspots	Hotspots
53	0.01	1.14791	0.26054	0.137941	0.122602	-0.102359	0.378241	110	5272	750	42264	52	CD14-DS18065.hg19.twopass.merge150.wgt10.zgt2.wig	CD14+	blood	hotspots	Hotspots
53	0.0001	2.41996	0.0559821	0.883749	0.462412	-0.0225774	1.79008	10	5272	36	42264	52	CD14-DS18065.hg19.twopass.merge150.wgt10.zgt2.wig	CD14+	blood	hotspots	Hotspots
53	1e-06	5.4765e-07	0.996606	-14.4176	3389.01	-6656.89	6628.05	0	5272	3	42264	52	CD14-DS18065.hg19.twopass.merge150.wgt10.zgt2.wig	CD14+	blood	hotspots	Hotspots
53	1e-08	1.04354e-06	0.996601	-13.7729	3232.68	-6349.82	6322.28	0	5272	2	42264	52	CD14-DS18065.hg19.twopass.merge150.wgt10.zgt2.wig	CD14+	blood	hotspots	Hotspots
53	1e-10	1	1	2.32215e-17	6062.16	-11881.8	11881.8	0	5272	0	42264	52	CD14-DS18065.hg19.twopass.merge150.wgt10.zgt2.wig	CD14+	blood	hotspots	Hotspots
53	1e-12	1	1	2.32215e-17	6062.16	-11881.8	11881.8	0	5272	0	42264	52	CD14-DS18065.hg19.twopass.merge150.wgt10.zgt2.wig	CD14+	blood	hotspots	Hotspots
53	1e-14	1	1	2.32215e-17	6062.16	-11881.8	11881.8	0	5272	0	42264	52	CD14-DS18065.hg19.twopass.merge150.wgt10.zgt2.wig	CD14+	blood	hotspots	Hotspots
53	1e-16	1	1	2.32215e-17	6062.16	-11881.8	11881.8	0	5272	0	42264	52	CD14-DS18065.hg19.twopass.merge150.wgt10.zgt2.wig	CD14+	blood	hotspots	Hotspots
53	1e-18	1	1	2.32215e-17	6062.16	-11881.8	11881.8	0	5272	0	42264	52	CD14-DS18065.hg19.twopass.merge150.wgt10.zgt2.wig	CD14+	blood	hotspots	Hotspots
53	1e-20	1	1	2.32215e-17	6062.16	-11881.8	11881.8	0	5272	0	42264	52	CD14-DS18065.hg19.twopass.merge150.wgt10.zgt2.wig	CD14+	blood	hotspots	Hotspots
54	0.01	1.1681	0.201588	0.155382	0.121673	-0.0830978	0.393861	112	5375	750	42264	53	CD20-DS17541.hg19.twopass.merge150.wgt10.zgt2.wig	CD20+	blood	hotspots	Hotspots
54	0.0001	1.87202	0.18276	0.627019	0.470627	-0.29541	1.54945	9	5375	36	42264	53	CD20-DS17541.hg19.twopass.merge150.wgt10.zgt2.wig	CD20+	blood	hotspots	Hotspots
54	1e-06	8.53989e-07	0.996658	-13.9733	3336.08	-6552.69	6524.74	0	5375	3	42264	53	CD20-DS17541.hg19.twopass.merge150.wgt10.zgt2.wig	CD20+	blood	hotspots	Hotspots
54	1e-08	1.91519e-06	0.996696	-13.1657	3179.41	-6244.8	6218.47	0	5375	2	42264	53	CD20-DS17541.hg19.twopass.merge150.wgt10.zgt2.wig	CD20+	blood	hotspots	Hotspots
54	1e-10	1	1	3.28926e-17	6027.64	-11814.2	11814.2	0	5375	0	42264	53	CD20-DS17541.hg19.twopass.merge150.wgt10.zgt2.wig	CD20+	blood	hotspots	Hotspots
54	1e-12	1	1	3.28926e-17	6027.64	-11814.2	11814.2	0	5375	0	42264	53	CD20-DS17541.hg19.twopass.merge150.wgt10.zgt2.wig	CD20+	blood	hotspots	Hotspots
54	1e-14	1	1	3.28926e-17	6027.64	-11814.2	11814.2	0	5375	0	42264	53	CD20-DS17541.hg19.twopass.merge150.wgt10.zgt2.wig	CD20+	blood	hotspots	Hotspots
54	1e-16	1	1	3.28926e-17	6027.64	-11814.2	11814.2	0	5375	0	42264	53	CD20-DS17541.hg19.twopass.merge150.wgt10.zgt2.wig	CD20+	blood	hotspots	Hotspots
54	1e-18	1	1	3.28926e-17	6027.64	-11814.2	11814.2	0	5375	0	42264	53	CD20-DS17541.hg19.twopass.merge150.wgt10.zgt2.wig	CD20+	blood	hotspots	Hotspots
54	1e-20	1	1	3.28926e-17	6027.64	-11814.2	11814.2	0	5375	0	42264	53	CD20-DS17541.hg19.twopass.merge150.wgt10.zgt2.wig	CD20+	blood	hotspots	Hotspots
55	0.01	1.07697	0.532833	0.0741509	0.118891	-0.158876	0.307178	127	6229	750	42264	54	CD34-DS16814.hg19.twopass.merge150.wgt10.zgt2.wig	CD34+	blood	hotspots	Hotspots
55	0.0001	2.98586	0.0159177	1.09389	0.453745	0.204547	1.98323	12	6229	36	42264	54	CD34-DS16814.hg19.twopass.merge150.wgt10.zgt2.wig	CD34+	blood	hotspots	Hotspots
55	1e-06	7.54922e-07	0.996386	-14.0967	3112.19	-6114	6085.8	0	6229	3	42264	54	CD34-DS16814.hg19.twopass.merge150.wgt10.zgt2.wig	CD34+	blood	hotspots	Hotspots
55	1e-08	1.75534e-06	0.996432	-13.2528	2963.35	-5821.42	5794.91	0	6229	2	42264	54	CD34-DS16814.hg19.twopass.merge150.wgt10.zgt2.wig	CD34+	blood	hotspots	Hotspots
55	1e-10	1	1	2.3187e-17	5767.22	-11303.8	11303.8	0	6229	0	42264	54	CD34-DS16814.hg19.twopass.merge150.wgt10.zgt2.wig	CD34+	blood	hotspots	Hotspots
55	1e-12	1	1	2.3187e-17	5767.22	-11303.8	11303.8	0	6229	0	42264	54	CD34-DS16814.hg19.twopass.merge150.wgt10.zgt2.wig	CD34+	blood	hotspots	Hotspots
55	1e-14	1	1	2.3187e-17	5767.22	-11303.8	11303.8	0	6229	0	42264	54	CD34-DS16814.hg19.twopass.merge150.wgt10.zgt2.wig	CD34+	blood	hotspots	Hotspots
55	1e-16	1	1	2.3187e-17	5767.22	-11303.8	11303.8	0	6229	0	42264	54	CD34-DS16814.hg19.twopass.merge150.wgt10.zgt2.wig	CD34+	blood	hotspots	Hotspots
55	1e-18	1	1	2.3187e-17	5767.22	-11303.8	11303.8	0	6229	0	42264	54	CD34-DS16814.hg19.twopass.merge150.wgt10.zgt2.wig	CD34+	blood	hotspots	Hotspots
55	1e-20	1	1	2.3187e-17	5767.22	-11303.8	11303.8	0	6229	0	42264	54	CD34-DS16814.hg19.twopass.merge150.wgt10.zgt2.wig	CD34+	blood	hotspots	Hotspots
56	0.01	1.27598	0.0494035	0.243714	0.124022	0.000631566	0.486797	111	5029	750	42264	55	CMK-DS12393.twopass.merge150.wgt10.zgt2.wig	CMK	blood	hotspots	Hotspots
56	0.0001	2.68852	0.03585	0.988989	0.471256	0.0653279	1.91265	10	5029	36	42264	55	CMK-DS12393.twopass.merge150.wgt10.zgt2.wig	CMK	blood	hotspots	Hotspots
56	1e-06	7.29695e-07	0.996743	-14.1306	3461.92	-6799.49	6771.23	0	5029	3	42264	55	CMK-DS12393.twopass.merge150.wgt10.zgt2.wig	CMK	blood	hotspots	Hotspots
56	1e-08	1.79033e-06	0.996789	-13.2331	3288.41	-6458.52	6432.05	0	5029	2	42264	55	CMK-DS12393.twopass.merge150.wgt10.zgt2.wig	CMK	blood	hotspots	Hotspots
56	1e-10	1	1	-1.99324e-18	6301.43	-12350.8	12350.8	0	5029	0	42264	55	CMK-DS12393.twopass.merge150.wgt10.zgt2.wig	CMK	blood	hotspots	Hotspots
56	1e-12	1	1	-1.99324e-18	6301.43	-12350.8	12350.8	0	5029	0	42264	55	CMK-DS12393.twopass.merge150.wgt10.zgt2.wig	CMK	blood	hotspots	Hotspots
56	1e-14	1	1	-1.99324e-18	6301.43	-12350.8	12350.8	0	5029	0	42264	55	CMK-DS12393.twopass.merge150.wgt10.zgt2.wig	CMK	blood	hotspots	Hotspots
56	1e-16	1	1	-1.99324e-18	6301.43	-12350.8	12350.8	0	5029	0	42264	55	CMK-DS12393.twopass.merge150.wgt10.zgt2.wig	CMK	blood	hotspots	Hotspots
56	1e-18	1	1	-1.99324e-18	6301.43	-12350.8	12350.8	0	5029	0	42264	55	CMK-DS12393.twopass.merge150.wgt10.zgt2.wig	CMK	blood	hotspots	Hotspots
56	1e-20	1	1	-1.99324e-18	6301.43	-12350.8	12350.8	0	5029	0	42264	55	CMK-DS12393.twopass.merge150.wgt10.zgt2.wig	CMK	blood	hotspots	Hotspots
57	0.01	1.14259	0.25659	0.133295	0.117493	-0.0969923	0.363582	134	6300	750	42264	56	E_myoblast_AllReps.30000000.twopass.merge150.wgt10.zgt2.wig	E_myoblast	muscle	hotspots	Hotspots
57	0.0001	2.02373	0.134385	0.70494	0.470892	-0.218008	1.62789	10	6300	36	42264	56	E_myoblast_AllReps.30000000.twopass.merge150.wgt10.zgt2.wig	E_myoblast	muscle	hotspots	Hotspots
57	1e-06	7.71772e-07	0.996405	-14.0746	3123.67	-6136.47	6108.33	0	6300	3	42264	56	E_myoblast_AllReps.30000000.twopass.merge150.wgt10.zgt2.wig	E_myoblast	muscle	hotspots	Hotspots
57	1e-08	2.20791e-06	0.996491	-13.0235	2961.16	-5816.9	5790.85	0	6300	2	42264	56	E_myoblast_AllReps.30000000.twopass.merge150.wgt10.zgt2.wig	E_myoblast	muscle	hotspots	Hotspots
57	1e-10	1	1	-8.77699e-18	5778.86	-11326.6	11326.6	0	6300	0	42264	56	E_myoblast_AllReps.30000000.twopass.merge150.wgt10.zgt2.wig	E_myoblast	muscle	hotspots	Hotspots
57	1e-12	1	1	-8.77699e-18	5778.86	-11326.6	11326.6	0	6300	0	42264	56	E_myoblast_AllReps.30000000.twopass.merge150.wgt10.zgt2.wig	E_myoblast	muscle	hotspots	Hotspots
57	1e-14	1	1	-8.77699e-18	5778.86	-11326.6	11326.6	0	6300	0	42264	56	E_myoblast_AllReps.30000000.twopass.merge150.wgt10.zgt2.wig	E_myoblast	muscle	hotspots	Hotspots
57	1e-16	1	1	-8.77699e-18	5778.86	-11326.6	11326.6	0	6300	0	42264	56	E_myoblast_AllReps.30000000.twopass.merge150.wgt10.zgt2.wig	E_myoblast	muscle	hotspots	Hotspots
57	1e-18	1	1	-8.77699e-18	5778.86	-11326.6	11326.6	0	6300	0	42264	56	E_myoblast_AllReps.30000000.twopass.merge150.wgt10.zgt2.wig	E_myoblast	muscle	hotspots	Hotspots
57	1e-20	1	1	-8.77699e-18	5778.86	-11326.6	11326.6	0	6300	0	42264	56	E_myoblast_AllReps.30000000.twopass.merge150.wgt10.zgt2.wig	E_myoblast	muscle	hotspots	Hotspots
58	0.01	1.12348	0.381258	0.116427	0.132971	-0.144197	0.377051	86	4406	750	42264	57	GM06990-DS7748.twopass.merge150.wgt10.zgt2.wig	GM06990	blood	hotspots	Hotspots
58	0.0001	2.5612	0.0502425	0.940475	0.48035	-0.00101184	1.88196	9	4406	36	42264	57	GM06990-DS7748.twopass.merge150.wgt10.zgt2.wig	GM06990	blood	hotspots	Hotspots
58	1e-06	5.94737e-07	0.99691	-14.3351	3701.65	-7269.57	7240.9	0	4406	3	42264	57	GM06990-DS7748.twopass.merge150.wgt10.zgt2.wig	GM06990	blood	hotspots	Hotspots
58	1e-08	1.02329e-06	0.996887	-13.7925	3534.56	-6941.53	6913.94	0	4406	2	42264	57	GM06990-DS7748.twopass.merge150.wgt10.zgt2.wig	GM06990	blood	hotspots	Hotspots
58	1e-10	1	1	1.70044e-17	6585.17	-12906.9	12906.9	0	4406	0	42264	57	GM06990-DS7748.twopass.merge150.wgt10.zgt2.wig	GM06990	blood	hotspots	Hotspots
58	1e-12	1	1	1.70044e-17	6585.17	-12906.9	12906.9	0	4406	0	42264	57	GM06990-DS7748.twopass.merge150.wgt10.zgt2.wig	GM06990	blood	hotspots	Hotspots
58	1e-14	1	1	1.70044e-17	6585.17	-12906.9	12906.9	0	4406	0	42264	57	GM06990-DS7748.twopass.merge150.wgt10.zgt2.wig	GM06990	blood	hotspots	Hotspots
58	1e-16	1	1	1.70044e-17	6585.17	-12906.9	12906.9	0	4406	0	42264	57	GM06990-DS7748.twopass.merge150.wgt10.zgt2.wig	GM06990	blood	hotspots	Hotspots
58	1e-18	1	1	1.70044e-17	6585.17	-12906.9	12906.9	0	4406	0	42264	57	GM06990-DS7748.twopass.merge150.wgt10.zgt2.wig	GM06990	blood	hotspots	Hotspots
58	1e-20	1	1	1.70044e-17	6585.17	-12906.9	12906.9	0	4406	0	42264	57	GM06990-DS7748.twopass.merge150.wgt10.zgt2.wig	GM06990	blood	hotspots	Hotspots
59	0.01	1.05349	0.680532	0.0521087	0.126558	-0.195945	0.300163	107	5466	750	42264	58	GM12864-DS12431.twopass.merge150.wgt10.zgt2.wig	GM12864	blood	hotspots	Hotspots
59	0.0001	2.39939	0.0644634	0.875216	0.473355	-0.0525607	1.80299	10	5466	36	42264	58	GM12864-DS12431.twopass.merge150.wgt10.zgt2.wig	GM12864	blood	hotspots	Hotspots
59	1e-06	5.01939e-07	0.996549	-14.5048	3353.38	-6587.13	6558.12	0	5466	3	42264	58	GM12864-DS12431.twopass.merge150.wgt10.zgt2.wig	GM12864	blood	hotspots	Hotspots
59	1e-08	8.13023e-07	0.996519	-14.0225	3214.32	-6314.09	6286.05	0	5466	2	42264	58	GM12864-DS12431.twopass.merge150.wgt10.zgt2.wig	GM12864	blood	hotspots	Hotspots
59	1e-10	1	1	5.70184e-18	6146.11	-12046.4	12046.4	0	5466	0	42264	58	GM12864-DS12431.twopass.merge150.wgt10.zgt2.wig	GM12864	blood	hotspots	Hotspots
59	1e-12	1	1	5.70184e-18	6146.11	-12046.4	12046.4	0	5466	0	42264	58	GM12864-DS12431.twopass.merge150.wgt10.zgt2.wig	GM12864	blood	hotspots	Hotspots
59	1e-14	1	1	5.70184e-18	6146.11	-12046.4	12046.4	0	5466	0	42264	58	GM12864-DS12431.twopass.merge150.wgt10.zgt2.wig	GM12864	blood	hotspots	Hotspots
59	1e-16	1	1	5.70184e-18	6146.11	-12046.4	12046.4	0	5466	0	42264	58	GM12864-DS12431.twopass.merge150.wgt10.zgt2.wig	GM12864	blood	hotspots	Hotspots
59	1e-18	1	1	5.70184e-18	6146.11	-12046.4	12046.4	0	5466	0	42264	58	GM12864-DS12431.twopass.merge150.wgt10.zgt2.wig	GM12864	blood	hotspots	Hotspots
59	1e-20	1	1	5.70184e-18	6146.11	-12046.4	12046.4	0	5466	0	42264	58	GM12864-DS12431.twopass.merge150.wgt10.zgt2.wig	GM12864	blood	hotspots	Hotspots
60	0.01	0.992006	0.949431	-0.00802591	0.126548	-0.256061	0.240009	111	5678	750	42264	59	GM12865-DS12436.twopass.merge150.wgt10.zgt2.wig	GM12865	blood	hotspots	Hotspots
60	0.0001	1.87356	0.194071	0.627841	0.483463	-0.319748	1.57543	9	5678	36	42264	59	GM12865-DS12436.twopass.merge150.wgt10.zgt2.wig	GM12865	blood	hotspots	Hotspots
60	1e-06	5.84211e-07	0.996534	-14.353	3303.67	-6489.56	6460.85	0	5678	3	42264	59	GM12865-DS12436.twopass.merge150.wgt10.zgt2.wig	GM12865	blood	hotspots	Hotspots
60	1e-08	1.18302e-06	0.996548	-13.6474	3154.54	-6196.54	6169.24	0	5678	2	42264	59	GM12865-DS12436.twopass.merge150.wgt10.zgt2.wig	GM12865	blood	hotspots	Hotspots
60	1e-10	1	1	2.00074e-17	6059.71	-11877	11877	0	5678	0	42264	59	GM12865-DS12436.twopass.merge150.wgt10.zgt2.wig	GM12865	blood	hotspots	Hotspots
60	1e-12	1	1	2.00074e-17	6059.71	-11877	11877	0	5678	0	42264	59	GM12865-DS12436.twopass.merge150.wgt10.zgt2.wig	GM12865	blood	hotspots	Hotspots
60	1e-14	1	1	2.00074e-17	6059.71	-11877	11877	0	5678	0	42264	59	GM12865-DS12436.twopass.merge150.wgt10.zgt2.wig	GM12865	blood	hotspots	Hotspots
60	1e-16	1	1	2.00074e-17	6059.71	-11877	11877	0	5678	0	42264	59	GM12865-DS12436.twopass.merge150.wgt10.zgt2.wig	GM12865	blood	hotspots	Hotspots
60	1e-18	1	1	2.00074e-17	6059.71	-11877	11877	0	5678	0	42264	59	GM12865-DS12436.twopass.merge150.wgt10.zgt2.wig	GM12865	blood	hotspots	Hotspots
60	1e-20	1	1	2.00074e-17	6059.71	-11877	11877	0	5678	0	42264	59	GM12865-DS12436.twopass.merge150.wgt10.zgt2.wig	GM12865	blood	hotspots	Hotspots
61	0.01	0.986032	0.901811	-0.014066	0.114011	-0.237528	0.209396	144	7748	750	42264	60	GM12878-all.twopass.merge150.wgt10.zgt2.wig	GM12878	blood	hotspots	Hotspots
61	0.0001	1.45413	0.42526	0.374405	0.469574	-0.54596	1.29477	10	7748	36	42264	60	GM12878-all.twopass.merge150.wgt10.zgt2.wig	GM12878	blood	hotspots	Hotspots
61	1e-06	7.38833e-07	0.996037	-14.1182	2842.42	-5585.26	5557.03	0	7748	3	42264	60	GM12878-all.twopass.merge150.wgt10.zgt2.wig	GM12878	blood	hotspots	Hotspots
61	1e-08	2.35893e-06	0.996168	-12.9573	2697.75	-5300.55	5274.64	0	7748	2	42264	60	GM12878-all.twopass.merge150.wgt10.zgt2.wig	GM12878	blood	hotspots	Hotspots
61	1e-10	1	1	8.47749e-18	5413.94	-10611.3	10611.3	0	7748	0	42264	60	GM12878-all.twopass.merge150.wgt10.zgt2.wig	GM12878	blood	hotspots	Hotspots
61	1e-12	1	1	8.47749e-18	5413.94	-10611.3	10611.3	0	7748	0	42264	60	GM12878-all.twopass.merge150.wgt10.zgt2.wig	GM12878	blood	hotspots	Hotspots
61	1e-14	1	1	8.47749e-18	5413.94	-10611.3	10611.3	0	7748	0	42264	60	GM12878-all.twopass.merge150.wgt10.zgt2.wig	GM12878	blood	hotspots	Hotspots
61	1e-16	1	1	8.47749e-18	5413.94	-10611.3	10611.3	0	7748	0	42264	60	GM12878-all.twopass.merge150.wgt10.zgt2.wig	GM12878	blood	hotspots	Hotspots
61	1e-18	1	1	8.47749e-18	5413.94	-10611.3	10611.3	0	7748	0	42264	60	GM12878-all.twopass.merge150.wgt10.zgt2.wig	GM12878	blood	hotspots	Hotspots
61	1e-20	1	1	8.47749e-18	5413.94	-10611.3	10611.3	0	7748	0	42264	60	GM12878-all.twopass.merge150.wgt10.zgt2.wig	GM12878	blood	hotspots	Hotspots
62	0.01	1.12692	0.313165	0.119485	0.118466	-0.112708	0.351677	134	6923	750	42264	61	HAc-DS14765.twopass.merge150.wgt10.zgt2.wig	HAc	cerebellar	hotspots	Hotspots
62	0.0001	1.15998	0.770819	0.148404	0.509447	-0.850113	1.14692	9	6923	36	42264	61	HAc-DS14765.twopass.merge150.wgt10.zgt2.wig	HAc	cerebellar	hotspots	Hotspots
62	1e-06	4.80888e-07	0.996196	-14.5476	3051.11	-5994.71	5965.62	0	6923	3	42264	61	HAc-DS14765.twopass.merge150.wgt10.zgt2.wig	HAc	cerebellar	hotspots	Hotspots
62	1e-08	8.85984e-07	0.996184	-13.9366	2914	-5725.38	5697.51	0	6923	2	42264	61	HAc-DS14765.twopass.merge150.wgt10.zgt2.wig	HAc	cerebellar	hotspots	Hotspots
62	1e-10	1	1	-1.73461e-17	5797.88	-11363.8	11363.8	0	6923	0	42264	61	HAc-DS14765.twopass.merge150.wgt10.zgt2.wig	HAc	cerebellar	hotspots	Hotspots
62	1e-12	1	1	-1.73461e-17	5797.88	-11363.8	11363.8	0	6923	0	42264	61	HAc-DS14765.twopass.merge150.wgt10.zgt2.wig	HAc	cerebellar	hotspots	Hotspots
62	1e-14	1	1	-1.73461e-17	5797.88	-11363.8	11363.8	0	6923	0	42264	61	HAc-DS14765.twopass.merge150.wgt10.zgt2.wig	HAc	cerebellar	hotspots	Hotspots
62	1e-16	1	1	-1.73461e-17	5797.88	-11363.8	11363.8	0	6923	0	42264	61	HAc-DS14765.twopass.merge150.wgt10.zgt2.wig	HAc	cerebellar	hotspots	Hotspots
62	1e-18	1	1	-1.73461e-17	5797.88	-11363.8	11363.8	0	6923	0	42264	61	HAc-DS14765.twopass.merge150.wgt10.zgt2.wig	HAc	cerebellar	hotspots	Hotspots
62	1e-20	1	1	-1.73461e-17	5797.88	-11363.8	11363.8	0	6923	0	42264	61	HAc-DS14765.twopass.merge150.wgt10.zgt2.wig	HAc	cerebellar	hotspots	Hotspots
63	0.01	1.3259	0.0165183	0.28209	0.117672	0.051453	0.512727	133	6093	750	42264	62	HAEpiC-DS12663.twopass.merge150.wgt10.zgt2.wig	HAEpiC	epithelium	hotspots	Hotspots
63	0.0001	1.37562	0.526372	0.318901	0.503353	-0.667671	1.30547	8	6093	36	42264	62	HAEpiC-DS12663.twopass.merge150.wgt10.zgt2.wig	HAEpiC	epithelium	hotspots	Hotspots
63	1e-06	5.85204e-07	0.996434	-14.3513	3210.65	-6307.23	6278.53	0	6093	3	42264	62	HAEpiC-DS12663.twopass.merge150.wgt10.zgt2.wig	HAEpiC	epithelium	hotspots	Hotspots
63	1e-08	1.07718e-06	0.996429	-13.7412	3070.19	-6031.32	6003.84	0	6093	2	42264	62	HAEpiC-DS12663.twopass.merge150.wgt10.zgt2.wig	HAEpiC	epithelium	hotspots	Hotspots
63	1e-10	1	1	9.66882e-18	5979.04	-11718.9	11718.9	0	6093	0	42264	62	HAEpiC-DS12663.twopass.merge150.wgt10.zgt2.wig	HAEpiC	epithelium	hotspots	Hotspots
63	1e-12	1	1	9.66882e-18	5979.04	-11718.9	11718.9	0	6093	0	42264	62	HAEpiC-DS12663.twopass.merge150.wgt10.zgt2.wig	HAEpiC	epithelium	hotspots	Hotspots
63	1e-14	1	1	9.66882e-18	5979.04	-11718.9	11718.9	0	6093	0	42264	62	HAEpiC-DS12663.twopass.merge150.wgt10.zgt2.wig	HAEpiC	epithelium	hotspots	Hotspots
63	1e-16	1	1	9.66882e-18	5979.04	-11718.9	11718.9	0	6093	0	42264	62	HAEpiC-DS12663.twopass.merge150.wgt10.zgt2.wig	HAEpiC	epithelium	hotspots	Hotspots
63	1e-18	1	1	9.66882e-18	5979.04	-11718.9	11718.9	0	6093	0	42264	62	HAEpiC-DS12663.twopass.merge150.wgt10.zgt2.wig	HAEpiC	epithelium	hotspots	Hotspots
63	1e-20	1	1	9.66882e-18	5979.04	-11718.9	11718.9	0	6093	0	42264	62	HAEpiC-DS12663.twopass.merge150.wgt10.zgt2.wig	HAEpiC	epithelium	hotspots	Hotspots
64	0.01	1.01189	0.917333	0.0118197	0.113877	-0.211379	0.235019	150	8268	750	42264	63	HAh-DS15192.twopass.merge150.wgt10.zgt2.wig	HA-h	brain_hippocampus	hotspots	Hotspots
64	0.0001	1.12331	0.813669	0.116277	0.493333	-0.850657	1.08321	10	8268	36	42264	63	HAh-DS15192.twopass.merge150.wgt10.zgt2.wig	HA-h	brain_hippocampus	hotspots	Hotspots
64	1e-06	5.60993e-07	0.995892	-14.3936	2795.74	-5494.05	5465.26	0	8268	3	42264	63	HAh-DS15192.twopass.merge150.wgt10.zgt2.wig	HA-h	brain_hippocampus	hotspots	Hotspots
64	1e-08	1.0514e-06	0.995894	-13.7654	2674.96	-5256.7	5229.16	0	8268	2	42264	63	HAh-DS15192.twopass.merge150.wgt10.zgt2.wig	HA-h	brain_hippocampus	hotspots	Hotspots
64	1e-10	1	1	1.06308e-17	5434.32	-10651.3	10651.3	0	8268	0	42264	63	HAh-DS15192.twopass.merge150.wgt10.zgt2.wig	HA-h	brain_hippocampus	hotspots	Hotspots
64	1e-12	1	1	1.06308e-17	5434.32	-10651.3	10651.3	0	8268	0	42264	63	HAh-DS15192.twopass.merge150.wgt10.zgt2.wig	HA-h	brain_hippocampus	hotspots	Hotspots
64	1e-14	1	1	1.06308e-17	5434.32	-10651.3	10651.3	0	8268	0	42264	63	HAh-DS15192.twopass.merge150.wgt10.zgt2.wig	HA-h	brain_hippocampus	hotspots	Hotspots
64	1e-16	1	1	1.06308e-17	5434.32	-10651.3	10651.3	0	8268	0	42264	63	HAh-DS15192.twopass.merge150.wgt10.zgt2.wig	HA-h	brain_hippocampus	hotspots	Hotspots
64	1e-18	1	1	1.06308e-17	5434.32	-10651.3	10651.3	0	8268	0	42264	63	HAh-DS15192.twopass.merge150.wgt10.zgt2.wig	HA-h	brain_hippocampus	hotspots	Hotspots
64	1e-20	1	1	1.06308e-17	5434.32	-10651.3	10651.3	0	8268	0	42264	63	HAh-DS15192.twopass.merge150.wgt10.zgt2.wig	HA-h	brain_hippocampus	hotspots	Hotspots
65	0.01	1.00996	0.929352	0.00990972	0.111772	-0.209163	0.228982	169	9201	750	42264	64	HAsp-DS14790.twopass.merge150.wgt10.zgt2.wig	HA-sp	spinal_cord	hotspots	Hotspots
65	0.0001	1.25389	0.64288	0.226255	0.487959	-0.730144	1.18265	10	9201	36	42264	64	HAsp-DS14790.twopass.merge150.wgt10.zgt2.wig	HA-sp	spinal_cord	hotspots	Hotspots
65	1e-06	6.14736e-07	0.995724	-14.3021	2668.96	-5245.46	5216.86	0	9201	3	42264	64	HAsp-DS14790.twopass.merge150.wgt10.zgt2.wig	HA-sp	spinal_cord	hotspots	Hotspots
65	1e-08	9.46142e-07	0.995679	-13.8709	2561.53	-5034.48	5006.73	0	9201	2	42264	64	HAsp-DS14790.twopass.merge150.wgt10.zgt2.wig	HA-sp	spinal_cord	hotspots	Hotspots
65	1e-10	1	1	-6.29825e-18	5314.73	-10416.9	10416.9	0	9201	0	42264	64	HAsp-DS14790.twopass.merge150.wgt10.zgt2.wig	HA-sp	spinal_cord	hotspots	Hotspots
65	1e-12	1	1	-6.29825e-18	5314.73	-10416.9	10416.9	0	9201	0	42264	64	HAsp-DS14790.twopass.merge150.wgt10.zgt2.wig	HA-sp	spinal_cord	hotspots	Hotspots
65	1e-14	1	1	-6.29825e-18	5314.73	-10416.9	10416.9	0	9201	0	42264	64	HAsp-DS14790.twopass.merge150.wgt10.zgt2.wig	HA-sp	spinal_cord	hotspots	Hotspots
65	1e-16	1	1	-6.29825e-18	5314.73	-10416.9	10416.9	0	9201	0	42264	64	HAsp-DS14790.twopass.merge150.wgt10.zgt2.wig	HA-sp	spinal_cord	hotspots	Hotspots
65	1e-18	1	1	-6.29825e-18	5314.73	-10416.9	10416.9	0	9201	0	42264	64	HAsp-DS14790.twopass.merge150.wgt10.zgt2.wig	HA-sp	spinal_cord	hotspots	Hotspots
65	1e-20	1	1	-6.29825e-18	5314.73	-10416.9	10416.9	0	9201	0	42264	64	HAsp-DS14790.twopass.merge150.wgt10.zgt2.wig	HA-sp	spinal_cord	hotspots	Hotspots
66	0.01	1.01581	0.893685	0.0156874	0.117382	-0.214382	0.245757	135	7357	750	42264	65	HBMEC-DS13817.twopass.merge150.wgt10.zgt2.wig	HBMEC	blood_vessel	hotspots	Hotspots
66	0.0001	0.802027	0.672621	-0.220613	0.522093	-1.24392	0.80269	7	7357	36	42264	65	HBMEC-DS13817.twopass.merge150.wgt10.zgt2.wig	HBMEC	blood_vessel	hotspots	Hotspots
66	1e-06	7.21122e-07	0.996153	-14.1425	2933.18	-5763.17	5734.89	0	7357	3	42264	65	HBMEC-DS13817.twopass.merge150.wgt10.zgt2.wig	HBMEC	blood_vessel	hotspots	Hotspots
66	1e-08	1.28632e-06	0.996148	-13.5637	2809.55	-5520.28	5493.15	0	7357	2	42264	65	HBMEC-DS13817.twopass.merge150.wgt10.zgt2.wig	HBMEC	blood_vessel	hotspots	Hotspots
66	1e-10	1	1	-1.30104e-18	5618.29	-11011.8	11011.8	0	7357	0	42264	65	HBMEC-DS13817.twopass.merge150.wgt10.zgt2.wig	HBMEC	blood_vessel	hotspots	Hotspots
66	1e-12	1	1	-1.30104e-18	5618.29	-11011.8	11011.8	0	7357	0	42264	65	HBMEC-DS13817.twopass.merge150.wgt10.zgt2.wig	HBMEC	blood_vessel	hotspots	Hotspots
66	1e-14	1	1	-1.30104e-18	5618.29	-11011.8	11011.8	0	7357	0	42264	65	HBMEC-DS13817.twopass.merge150.wgt10.zgt2.wig	HBMEC	blood_vessel	hotspots	Hotspots
66	1e-16	1	1	-1.30104e-18	5618.29	-11011.8	11011.8	0	7357	0	42264	65	HBMEC-DS13817.twopass.merge150.wgt10.zgt2.wig	HBMEC	blood_vessel	hotspots	Hotspots
66	1e-18	1	1	-1.30104e-18	5618.29	-11011.8	11011.8	0	7357	0	42264	65	HBMEC-DS13817.twopass.merge150.wgt10.zgt2.wig	HBMEC	blood_vessel	hotspots	Hotspots
66	1e-20	1	1	-1.30104e-18	5618.29	-11011.8	11011.8	0	7357	0	42264	65	HBMEC-DS13817.twopass.merge150.wgt10.zgt2.wig	HBMEC	blood_vessel	hotspots	Hotspots
67	0.01	1.13119	0.286959	0.123273	0.115769	-0.103635	0.35018	140	7088	750	42264	66	HCFaa-DS13480.twopass.merge150.wgt10.zgt2.wig	HCFaa	heart	hotspots	Hotspots
67	0.0001	1.39426	0.498181	0.332367	0.490684	-0.629374	1.29411	9	7088	36	42264	66	HCFaa-DS13480.twopass.merge150.wgt10.zgt2.wig	HCFaa	heart	hotspots	Hotspots
67	1e-06	5.07016e-07	0.996149	-14.4947	3002.98	-5900.33	5871.34	0	7088	3	42264	66	HCFaa-DS13480.twopass.merge150.wgt10.zgt2.wig	HCFaa	heart	hotspots	Hotspots
67	1e-08	9.13948e-07	0.996133	-13.9055	2869.08	-5637.3	5609.48	0	7088	2	42264	66	HCFaa-DS13480.twopass.merge150.wgt10.zgt2.wig	HCFaa	heart	hotspots	Hotspots
67	1e-10	1	1	4.48847e-18	5666.69	-11106.7	11106.7	0	7088	0	42264	66	HCFaa-DS13480.twopass.merge150.wgt10.zgt2.wig	HCFaa	heart	hotspots	Hotspots
67	1e-12	1	1	4.48847e-18	5666.69	-11106.7	11106.7	0	7088	0	42264	66	HCFaa-DS13480.twopass.merge150.wgt10.zgt2.wig	HCFaa	heart	hotspots	Hotspots
67	1e-14	1	1	4.48847e-18	5666.69	-11106.7	11106.7	0	7088	0	42264	66	HCFaa-DS13480.twopass.merge150.wgt10.zgt2.wig	HCFaa	heart	hotspots	Hotspots
67	1e-16	1	1	4.48847e-18	5666.69	-11106.7	11106.7	0	7088	0	42264	66	HCFaa-DS13480.twopass.merge150.wgt10.zgt2.wig	HCFaa	heart	hotspots	Hotspots
67	1e-18	1	1	4.48847e-18	5666.69	-11106.7	11106.7	0	7088	0	42264	66	HCFaa-DS13480.twopass.merge150.wgt10.zgt2.wig	HCFaa	heart	hotspots	Hotspots
67	1e-20	1	1	4.48847e-18	5666.69	-11106.7	11106.7	0	7088	0	42264	66	HCFaa-DS13480.twopass.merge150.wgt10.zgt2.wig	HCFaa	heart	hotspots	Hotspots
68	0.01	1.20667	0.122652	0.187865	0.121695	-0.0506572	0.426386	118	5721	750	42264	67	HCF-DS12501.twopass.merge150.wgt10.zgt2.wig	HCF	heart	hotspots	Hotspots
68	0.0001	1.87437	0.199944	0.628274	0.490184	-0.332486	1.58903	10	5721	36	42264	67	HCF-DS12501.twopass.merge150.wgt10.zgt2.wig	HCF	heart	hotspots	Hotspots
68	1e-06	5.27483e-07	0.996512	-14.4551	3306.89	-6495.96	6467.05	0	5721	3	42264	67	HCF-DS12501.twopass.merge150.wgt10.zgt2.wig	HCF	heart	hotspots	Hotspots
68	1e-08	1.29475e-06	0.996558	-13.5572	3142.25	-6172.36	6145.24	0	5721	2	42264	67	HCF-DS12501.twopass.merge150.wgt10.zgt2.wig	HCF	heart	hotspots	Hotspots
68	1e-10	1	1	5.48785e-18	6079.41	-11915.6	11915.6	0	5721	0	42264	67	HCF-DS12501.twopass.merge150.wgt10.zgt2.wig	HCF	heart	hotspots	Hotspots
68	1e-12	1	1	5.48785e-18	6079.41	-11915.6	11915.6	0	5721	0	42264	67	HCF-DS12501.twopass.merge150.wgt10.zgt2.wig	HCF	heart	hotspots	Hotspots
68	1e-14	1	1	5.48785e-18	6079.41	-11915.6	11915.6	0	5721	0	42264	67	HCF-DS12501.twopass.merge150.wgt10.zgt2.wig	HCF	heart	hotspots	Hotspots
68	1e-16	1	1	5.48785e-18	6079.41	-11915.6	11915.6	0	5721	0	42264	67	HCF-DS12501.twopass.merge150.wgt10.zgt2.wig	HCF	heart	hotspots	Hotspots
68	1e-18	1	1	5.48785e-18	6079.41	-11915.6	11915.6	0	5721	0	42264	67	HCF-DS12501.twopass.merge150.wgt10.zgt2.wig	HCF	heart	hotspots	Hotspots
68	1e-20	1	1	5.48785e-18	6079.41	-11915.6	11915.6	0	5721	0	42264	67	HCF-DS12501.twopass.merge150.wgt10.zgt2.wig	HCF	heart	hotspots	Hotspots
69	0.01	1.16734	0.192583	0.154725	0.118748	-0.0780201	0.387471	129	6280	750	42264	68	HCM-DS12599.twopass.merge150.wgt10.zgt2.wig	HCM	heart	hotspots	Hotspots
69	0.0001	2.59549	0.0424006	0.953776	0.46994	0.0326923	1.87486	11	6280	36	42264	68	HCM-DS12599.twopass.merge150.wgt10.zgt2.wig	HCM	heart	hotspots	Hotspots
69	1e-06	5.12212e-07	0.996342	-14.4845	3159.67	-6207.44	6178.47	0	6280	3	42264	68	HCM-DS12599.twopass.merge150.wgt10.zgt2.wig	HCM	heart	hotspots	Hotspots
69	1e-08	9.20584e-07	0.996329	-13.8983	3020.71	-5934.49	5906.7	0	6280	2	42264	68	HCM-DS12599.twopass.merge150.wgt10.zgt2.wig	HCM	heart	hotspots	Hotspots
69	1e-10	1	1	-7.09487e-18	5870.08	-11505.4	11505.4	0	6280	0	42264	68	HCM-DS12599.twopass.merge150.wgt10.zgt2.wig	HCM	heart	hotspots	Hotspots
69	1e-12	1	1	-7.09487e-18	5870.08	-11505.4	11505.4	0	6280	0	42264	68	HCM-DS12599.twopass.merge150.wgt10.zgt2.wig	HCM	heart	hotspots	Hotspots
69	1e-14	1	1	-7.09487e-18	5870.08	-11505.4	11505.4	0	6280	0	42264	68	HCM-DS12599.twopass.merge150.wgt10.zgt2.wig	HCM	heart	hotspots	Hotspots
69	1e-16	1	1	-7.09487e-18	5870.08	-11505.4	11505.4	0	6280	0	42264	68	HCM-DS12599.twopass.merge150.wgt10.zgt2.wig	HCM	heart	hotspots	Hotspots
69	1e-18	1	1	-7.09487e-18	5870.08	-11505.4	11505.4	0	6280	0	42264	68	HCM-DS12599.twopass.merge150.wgt10.zgt2.wig	HCM	heart	hotspots	Hotspots
69	1e-20	1	1	-7.09487e-18	5870.08	-11505.4	11505.4	0	6280	0	42264	68	HCM-DS12599.twopass.merge150.wgt10.zgt2.wig	HCM	heart	hotspots	Hotspots
70	0.01	1.49043	0.000652146	0.399064	0.117064	0.169619	0.628509	135	5721	750	42264	69	HConF-DS11642.twopass.merge150.wgt10.zgt2.wig	HConF	eye	hotspots	Hotspots
70	0.0001	1.90009	0.18953	0.641901	0.489265	-0.317058	1.60086	10	5721	36	42264	69	HConF-DS11642.twopass.merge150.wgt10.zgt2.wig	HConF	eye	hotspots	Hotspots
70	1e-06	6.33677e-07	0.99656	-14.2717	3309.98	-6501.83	6473.29	0	5721	3	42264	69	HConF-DS11642.twopass.merge150.wgt10.zgt2.wig	HConF	eye	hotspots	Hotspots
70	1e-08	1.73998e-06	0.996631	-13.2616	3141.14	-6169.9	6143.38	0	5721	2	42264	69	HConF-DS11642.twopass.merge150.wgt10.zgt2.wig	HConF	eye	hotspots	Hotspots
70	1e-10	1	1	1.00286e-18	6099.72	-11955.4	11955.4	0	5721	0	42264	69	HConF-DS11642.twopass.merge150.wgt10.zgt2.wig	HConF	eye	hotspots	Hotspots
70	1e-12	1	1	1.00286e-18	6099.72	-11955.4	11955.4	0	5721	0	42264	69	HConF-DS11642.twopass.merge150.wgt10.zgt2.wig	HConF	eye	hotspots	Hotspots
70	1e-14	1	1	1.00286e-18	6099.72	-11955.4	11955.4	0	5721	0	42264	69	HConF-DS11642.twopass.merge150.wgt10.zgt2.wig	HConF	eye	hotspots	Hotspots
70	1e-16	1	1	1.00286e-18	6099.72	-11955.4	11955.4	0	5721	0	42264	69	HConF-DS11642.twopass.merge150.wgt10.zgt2.wig	HConF	eye	hotspots	Hotspots
70	1e-18	1	1	1.00286e-18	6099.72	-11955.4	11955.4	0	5721	0	42264	69	HConF-DS11642.twopass.merge150.wgt10.zgt2.wig	HConF	eye	hotspots	Hotspots
70	1e-20	1	1	1.00286e-18	6099.72	-11955.4	11955.4	0	5721	0	42264	69	HConF-DS11642.twopass.merge150.wgt10.zgt2.wig	HConF	eye	hotspots	Hotspots
71	0.01	1.18855	0.146289	0.17273	0.118897	-0.060309	0.405769	123	6344	750	42264	70	HCPEpiC-DS12447.twopass.merge150.wgt10.zgt2.wig	HCPEpiC	epithelium	hotspots	Hotspots
71	0.0001	1.66445	0.298773	0.509495	0.490339	-0.451569	1.47056	9	6344	36	42264	70	HCPEpiC-DS12447.twopass.merge150.wgt10.zgt2.wig	HCPEpiC	epithelium	hotspots	Hotspots
71	1e-06	6.83209e-07	0.996403	-14.1965	3148.64	-6185.52	6157.13	0	6344	3	42264	70	HCPEpiC-DS12447.twopass.merge150.wgt10.zgt2.wig	HCPEpiC	epithelium	hotspots	Hotspots
71	1e-08	1.29733e-06	0.99641	-13.5552	3012.36	-5917.78	5890.67	0	6344	2	42264	70	HCPEpiC-DS12447.twopass.merge150.wgt10.zgt2.wig	HCPEpiC	epithelium	hotspots	Hotspots
71	1e-10	1	1	3.39711e-18	5897.62	-11559.3	11559.3	0	6344	0	42264	70	HCPEpiC-DS12447.twopass.merge150.wgt10.zgt2.wig	HCPEpiC	epithelium	hotspots	Hotspots
71	1e-12	1	1	3.39711e-18	5897.62	-11559.3	11559.3	0	6344	0	42264	70	HCPEpiC-DS12447.twopass.merge150.wgt10.zgt2.wig	HCPEpiC	epithelium	hotspots	Hotspots
71	1e-14	1	1	3.39711e-18	5897.62	-11559.3	11559.3	0	6344	0	42264	70	HCPEpiC-DS12447.twopass.merge150.wgt10.zgt2.wig	HCPEpiC	epithelium	hotspots	Hotspots
71	1e-16	1	1	3.39711e-18	5897.62	-11559.3	11559.3	0	6344	0	42264	70	HCPEpiC-DS12447.twopass.merge150.wgt10.zgt2.wig	HCPEpiC	epithelium	hotspots	Hotspots
71	1e-18	1	1	3.39711e-18	5897.62	-11559.3	11559.3	0	6344	0	42264	70	HCPEpiC-DS12447.twopass.merge150.wgt10.zgt2.wig	HCPEpiC	epithelium	hotspots	Hotspots
71	1e-20	1	1	3.39711e-18	5897.62	-11559.3	11559.3	0	6344	0	42264	70	HCPEpiC-DS12447.twopass.merge150.wgt10.zgt2.wig	HCPEpiC	epithelium	hotspots	Hotspots
72	0.01	1.15978	0.251242	0.148234	0.129198	-0.104994	0.401462	105	4938	750	42264	71	HCT116-DS13551.twopass.merge150.wgt10.zgt2.wig	HCT-116	colon	hotspots	Hotspots
72	0.0001	1.05162	0.925147	0.0503358	0.53576	-0.999754	1.10043	6	4938	36	42264	71	HCT116-DS13551.twopass.merge150.wgt10.zgt2.wig	HCT-116	colon	hotspots	Hotspots
72	1e-06	6.94185e-07	0.99679	-14.1805	3524.97	-6923.13	6894.76	0	4938	3	42264	71	HCT116-DS13551.twopass.merge150.wgt10.zgt2.wig	HCT-116	colon	hotspots	Hotspots
72	1e-08	1.02721e-06	0.99675	-13.7887	3385.33	-6649.04	6621.46	0	4938	2	42264	71	HCT116-DS13551.twopass.merge150.wgt10.zgt2.wig	HCT-116	colon	hotspots	Hotspots
72	1e-10	1	1	1.42363e-17	6441.57	-12625.5	12625.5	0	4938	0	42264	71	HCT116-DS13551.twopass.merge150.wgt10.zgt2.wig	HCT-116	colon	hotspots	Hotspots
72	1e-12	1	1	1.42363e-17	6441.57	-12625.5	12625.5	0	4938	0	42264	71	HCT116-DS13551.twopass.merge150.wgt10.zgt2.wig	HCT-116	colon	hotspots	Hotspots
72	1e-14	1	1	1.42363e-17	6441.57	-12625.5	12625.5	0	4938	0	42264	71	HCT116-DS13551.twopass.merge150.wgt10.zgt2.wig	HCT-116	colon	hotspots	Hotspots
72	1e-16	1	1	1.42363e-17	6441.57	-12625.5	12625.5	0	4938	0	42264	71	HCT116-DS13551.twopass.merge150.wgt10.zgt2.wig	HCT-116	colon	hotspots	Hotspots
72	1e-18	1	1	1.42363e-17	6441.57	-12625.5	12625.5	0	4938	0	42264	71	HCT116-DS13551.twopass.merge150.wgt10.zgt2.wig	HCT-116	colon	hotspots	Hotspots
72	1e-20	1	1	1.42363e-17	6441.57	-12625.5	12625.5	0	4938	0	42264	71	HCT116-DS13551.twopass.merge150.wgt10.zgt2.wig	HCT-116	colon	hotspots	Hotspots
73	0.01	1.09139	0.468373	0.0874503	0.1206	-0.148925	0.323826	127	6699	750	42264	72	HEEpiC-DS12763.twopass.merge150.wgt10.zgt2.wig	HEEpiC	epithelium	hotspots	Hotspots
73	0.0001	1.96579	0.166656	0.675896	0.488707	-0.28197	1.63376	10	6699	36	42264	72	HEEpiC-DS12763.twopass.merge150.wgt10.zgt2.wig	HEEpiC	epithelium	hotspots	Hotspots
73	1e-06	6.39898e-07	0.996292	-14.262	3068.79	-6029.09	6000.57	0	6699	3	42264	72	HEEpiC-DS12763.twopass.merge150.wgt10.zgt2.wig	HEEpiC	epithelium	hotspots	Hotspots
73	1e-08	9.11966e-07	0.996239	-13.9077	2950.41	-5796.71	5768.89	0	6699	2	42264	72	HEEpiC-DS12763.twopass.merge150.wgt10.zgt2.wig	HEEpiC	epithelium	hotspots	Hotspots
73	1e-10	1	1	1.50855e-17	5879.02	-11522.9	11522.9	0	6699	0	42264	72	HEEpiC-DS12763.twopass.merge150.wgt10.zgt2.wig	HEEpiC	epithelium	hotspots	Hotspots
73	1e-12	1	1	1.50855e-17	5879.02	-11522.9	11522.9	0	6699	0	42264	72	HEEpiC-DS12763.twopass.merge150.wgt10.zgt2.wig	HEEpiC	epithelium	hotspots	Hotspots
73	1e-14	1	1	1.50855e-17	5879.02	-11522.9	11522.9	0	6699	0	42264	72	HEEpiC-DS12763.twopass.merge150.wgt10.zgt2.wig	HEEpiC	epithelium	hotspots	Hotspots
73	1e-16	1	1	1.50855e-17	5879.02	-11522.9	11522.9	0	6699	0	42264	72	HEEpiC-DS12763.twopass.merge150.wgt10.zgt2.wig	HEEpiC	epithelium	hotspots	Hotspots
73	1e-18	1	1	1.50855e-17	5879.02	-11522.9	11522.9	0	6699	0	42264	72	HEEpiC-DS12763.twopass.merge150.wgt10.zgt2.wig	HEEpiC	epithelium	hotspots	Hotspots
73	1e-20	1	1	1.50855e-17	5879.02	-11522.9	11522.9	0	6699	0	42264	72	HEEpiC-DS12763.twopass.merge150.wgt10.zgt2.wig	HEEpiC	epithelium	hotspots	Hotspots
74	0.01	1.04028	0.717237	0.0394859	0.109031	-0.174215	0.253186	174	9218	750	42264	73	Hela-all.twopass.merge150.wgt10.zgt2.wig	HeLa-S3	cervix	hotspots	Hotspots
74	0.0001	1.12498	0.806188	0.117762	0.479985	-0.823008	1.05853	10	9218	36	42264	73	Hela-all.twopass.merge150.wgt10.zgt2.wig	HeLa-S3	cervix	hotspots	Hotspots
74	1e-06	5.45349e-07	0.995644	-14.4218	2641.74	-5192.23	5163.38	0	9218	3	42264	73	Hela-all.twopass.merge150.wgt10.zgt2.wig	HeLa-S3	cervix	hotspots	Hotspots
74	1e-08	1.50509e-06	0.995741	-13.4067	2511.83	-4936.6	4909.78	0	9218	2	42264	73	Hela-all.twopass.merge150.wgt10.zgt2.wig	HeLa-S3	cervix	hotspots	Hotspots
74	1e-10	1	1	-9.53118e-18	5207.85	-10207.4	10207.4	0	9218	0	42264	73	Hela-all.twopass.merge150.wgt10.zgt2.wig	HeLa-S3	cervix	hotspots	Hotspots
74	1e-12	1	1	-9.53118e-18	5207.85	-10207.4	10207.4	0	9218	0	42264	73	Hela-all.twopass.merge150.wgt10.zgt2.wig	HeLa-S3	cervix	hotspots	Hotspots
74	1e-14	1	1	-9.53118e-18	5207.85	-10207.4	10207.4	0	9218	0	42264	73	Hela-all.twopass.merge150.wgt10.zgt2.wig	HeLa-S3	cervix	hotspots	Hotspots
74	1e-16	1	1	-9.53118e-18	5207.85	-10207.4	10207.4	0	9218	0	42264	73	Hela-all.twopass.merge150.wgt10.zgt2.wig	HeLa-S3	cervix	hotspots	Hotspots
74	1e-18	1	1	-9.53118e-18	5207.85	-10207.4	10207.4	0	9218	0	42264	73	Hela-all.twopass.merge150.wgt10.zgt2.wig	HeLa-S3	cervix	hotspots	Hotspots
74	1e-20	1	1	-9.53118e-18	5207.85	-10207.4	10207.4	0	9218	0	42264	73	Hela-all.twopass.merge150.wgt10.zgt2.wig	HeLa-S3	cervix	hotspots	Hotspots
75	0.01	1.04035	0.73155	0.0395549	0.115299	-0.186431	0.265541	141	7215	750	42264	74	HepG2-all.twopass.merge150.wgt10.zgt2.wig	HepG2	liver	hotspots	Hotspots
75	0.0001	1.63851	0.294253	0.493785	0.470792	-0.428968	1.41654	10	7215	36	42264	74	HepG2-all.twopass.merge150.wgt10.zgt2.wig	HepG2	liver	hotspots	Hotspots
75	1e-06	7.18422e-07	0.99615	-14.1462	2931.34	-5759.58	5731.28	0	7215	3	42264	74	HepG2-all.twopass.merge150.wgt10.zgt2.wig	HepG2	liver	hotspots	Hotspots
75	1e-08	1.79304e-06	0.996219	-13.2316	2792.24	-5486.02	5459.56	0	7215	2	42264	74	HepG2-all.twopass.merge150.wgt10.zgt2.wig	HepG2	liver	hotspots	Hotspots
75	1e-10	1	1	-2.16445e-17	5540.7	-10859.8	10859.8	0	7215	0	42264	74	HepG2-all.twopass.merge150.wgt10.zgt2.wig	HepG2	liver	hotspots	Hotspots
75	1e-12	1	1	-2.16445e-17	5540.7	-10859.8	10859.8	0	7215	0	42264	74	HepG2-all.twopass.merge150.wgt10.zgt2.wig	HepG2	liver	hotspots	Hotspots
75	1e-14	1	1	-2.16445e-17	5540.7	-10859.8	10859.8	0	7215	0	42264	74	HepG2-all.twopass.merge150.wgt10.zgt2.wig	HepG2	liver	hotspots	Hotspots
75	1e-16	1	1	-2.16445e-17	5540.7	-10859.8	10859.8	0	7215	0	42264	74	HepG2-all.twopass.merge150.wgt10.zgt2.wig	HepG2	liver	hotspots	Hotspots
75	1e-18	1	1	-2.16445e-17	5540.7	-10859.8	10859.8	0	7215	0	42264	74	HepG2-all.twopass.merge150.wgt10.zgt2.wig	HepG2	liver	hotspots	Hotspots
75	1e-20	1	1	-2.16445e-17	5540.7	-10859.8	10859.8	0	7215	0	42264	74	HepG2-all.twopass.merge150.wgt10.zgt2.wig	HepG2	liver	hotspots	Hotspots
76	0.01	1.04421	0.692003	0.043259	0.109202	-0.170777	0.257295	180	9506	750	42264	75	HESC-all.twopass.merge150.wgt10.zgt2.wig	HESC	es_cell	hotspots	Hotspots
76	0.0001	3.2338	0.00927143	1.17366	0.45108	0.289539	2.05777	16	9506	36	42264	75	HESC-all.twopass.merge150.wgt10.zgt2.wig	HESC	es_cell	hotspots	Hotspots
76	1e-06	5.75925e-07	0.995607	-14.3673	2609.53	-5129.04	5100.3	0	9506	3	42264	75	HESC-all.twopass.merge150.wgt10.zgt2.wig	HESC	es_cell	hotspots	Hotspots
76	1e-08	1.4422e-06	0.995684	-13.4493	2486.38	-4886.75	4859.85	0	9506	2	42264	75	HESC-all.twopass.merge150.wgt10.zgt2.wig	HESC	es_cell	hotspots	Hotspots
76	1e-10	1	1	-1.12552e-17	5215.62	-10222.6	10222.6	0	9506	0	42264	75	HESC-all.twopass.merge150.wgt10.zgt2.wig	HESC	es_cell	hotspots	Hotspots
76	1e-12	1	1	-1.12552e-17	5215.62	-10222.6	10222.6	0	9506	0	42264	75	HESC-all.twopass.merge150.wgt10.zgt2.wig	HESC	es_cell	hotspots	Hotspots
76	1e-14	1	1	-1.12552e-17	5215.62	-10222.6	10222.6	0	9506	0	42264	75	HESC-all.twopass.merge150.wgt10.zgt2.wig	HESC	es_cell	hotspots	Hotspots
76	1e-16	1	1	-1.12552e-17	5215.62	-10222.6	10222.6	0	9506	0	42264	75	HESC-all.twopass.merge150.wgt10.zgt2.wig	HESC	es_cell	hotspots	Hotspots
76	1e-18	1	1	-1.12552e-17	5215.62	-10222.6	10222.6	0	9506	0	42264	75	HESC-all.twopass.merge150.wgt10.zgt2.wig	HESC	es_cell	hotspots	Hotspots
76	1e-20	1	1	-1.12552e-17	5215.62	-10222.6	10222.6	0	9506	0	42264	75	HESC-all.twopass.merge150.wgt10.zgt2.wig	HESC	es_cell	hotspots	Hotspots
77	0.01	1.15433	0.205491	0.143521	0.11336	-0.078665	0.365707	177	8770	750	42264	76	hESCT0-DS11909.twopass.merge150.wgt10.zgt2.wig	hESCT0	es_cell	hotspots	Hotspots
77	0.0001	0.795589	0.661456	-0.228672	0.522197	-1.25218	0.794834	9	8770	36	42264	76	hESCT0-DS11909.twopass.merge150.wgt10.zgt2.wig	hESCT0	es_cell	hotspots	Hotspots
77	1e-06	5.64246e-07	0.995795	-14.3878	2729.83	-5364.85	5336.08	0	8770	3	42264	76	hESCT0-DS11909.twopass.merge150.wgt10.zgt2.wig	hESCT0	es_cell	hotspots	Hotspots
77	1e-08	1.23759e-06	0.995834	-13.6023	2605.27	-5119.93	5092.73	0	8770	2	42264	76	hESCT0-DS11909.twopass.merge150.wgt10.zgt2.wig	hESCT0	es_cell	hotspots	Hotspots
77	1e-10	1	1	1.63209e-18	5517.28	-10813.9	10813.9	0	8770	0	42264	76	hESCT0-DS11909.twopass.merge150.wgt10.zgt2.wig	hESCT0	es_cell	hotspots	Hotspots
77	1e-12	1	1	1.63209e-18	5517.28	-10813.9	10813.9	0	8770	0	42264	76	hESCT0-DS11909.twopass.merge150.wgt10.zgt2.wig	hESCT0	es_cell	hotspots	Hotspots
77	1e-14	1	1	1.63209e-18	5517.28	-10813.9	10813.9	0	8770	0	42264	76	hESCT0-DS11909.twopass.merge150.wgt10.zgt2.wig	hESCT0	es_cell	hotspots	Hotspots
77	1e-16	1	1	1.63209e-18	5517.28	-10813.9	10813.9	0	8770	0	42264	76	hESCT0-DS11909.twopass.merge150.wgt10.zgt2.wig	hESCT0	es_cell	hotspots	Hotspots
77	1e-18	1	1	1.63209e-18	5517.28	-10813.9	10813.9	0	8770	0	42264	76	hESCT0-DS11909.twopass.merge150.wgt10.zgt2.wig	hESCT0	es_cell	hotspots	Hotspots
77	1e-20	1	1	1.63209e-18	5517.28	-10813.9	10813.9	0	8770	0	42264	76	hESCT0-DS11909.twopass.merge150.wgt10.zgt2.wig	hESCT0	es_cell	hotspots	Hotspots
78	0.01	1.17671	0.160563	0.162721	0.115965	-0.0645716	0.390013	134	6726	750	42264	77	HFF-DS15115.twopass.merge150.wgt10.zgt2.wig	HFF	foreskin	hotspots	Hotspots
78	0.0001	2.34022	0.0687125	0.850244	0.467089	-0.0652497	1.76574	11	6726	36	42264	77	HFF-DS15115.twopass.merge150.wgt10.zgt2.wig	HFF	foreskin	hotspots	Hotspots
78	1e-06	5.96019e-07	0.996258	-14.333	3056.21	-6004.5	5975.83	0	6726	3	42264	77	HFF-DS15115.twopass.merge150.wgt10.zgt2.wig	HFF	foreskin	hotspots	Hotspots
78	1e-08	1.19473e-06	0.996267	-13.6376	2915.25	-5727.52	5700.24	0	6726	2	42264	77	HFF-DS15115.twopass.merge150.wgt10.zgt2.wig	HFF	foreskin	hotspots	Hotspots
78	1e-10	1	1	7.3628e-18	5724.16	-11219.4	11219.4	0	6726	0	42264	77	HFF-DS15115.twopass.merge150.wgt10.zgt2.wig	HFF	foreskin	hotspots	Hotspots
78	1e-12	1	1	7.3628e-18	5724.16	-11219.4	11219.4	0	6726	0	42264	77	HFF-DS15115.twopass.merge150.wgt10.zgt2.wig	HFF	foreskin	hotspots	Hotspots
78	1e-14	1	1	7.3628e-18	5724.16	-11219.4	11219.4	0	6726	0	42264	77	HFF-DS15115.twopass.merge150.wgt10.zgt2.wig	HFF	foreskin	hotspots	Hotspots
78	1e-16	1	1	7.3628e-18	5724.16	-11219.4	11219.4	0	6726	0	42264	77	HFF-DS15115.twopass.merge150.wgt10.zgt2.wig	HFF	foreskin	hotspots	Hotspots
78	1e-18	1	1	7.3628e-18	5724.16	-11219.4	11219.4	0	6726	0	42264	77	HFF-DS15115.twopass.merge150.wgt10.zgt2.wig	HFF	foreskin	hotspots	Hotspots
78	1e-20	1	1	7.3628e-18	5724.16	-11219.4	11219.4	0	6726	0	42264	77	HFF-DS15115.twopass.merge150.wgt10.zgt2.wig	HFF	foreskin	hotspots	Hotspots
79	0.01	1.17524	0.155497	0.161473	0.113683	-0.0613455	0.384291	149	7257	750	42264	78	HFF_MyC-DS15079.twopass.merge150.wgt10.zgt2.wig	HFF-Myc	foreskin	hotspots	Hotspots
79	0.0001	1.64927	0.29567	0.500332	0.478437	-0.437404	1.43807	10	7257	36	42264	78	HFF_MyC-DS15079.twopass.merge150.wgt10.zgt2.wig	HFF-Myc	foreskin	hotspots	Hotspots
79	1e-06	5.72346e-07	0.996116	-14.3735	2952.38	-5801.04	5772.3	0	7257	3	42264	78	HFF_MyC-DS15079.twopass.merge150.wgt10.zgt2.wig	HFF-Myc	foreskin	hotspots	Hotspots
79	1e-08	1.19853e-06	0.996135	-13.6344	2814.8	-5530.64	5503.38	0	7257	2	42264	78	HFF_MyC-DS15079.twopass.merge150.wgt10.zgt2.wig	HFF-Myc	foreskin	hotspots	Hotspots
79	1e-10	1	1	-9.98083e-18	5593.34	-10963	10963	0	7257	0	42264	78	HFF_MyC-DS15079.twopass.merge150.wgt10.zgt2.wig	HFF-Myc	foreskin	hotspots	Hotspots
79	1e-12	1	1	-9.98083e-18	5593.34	-10963	10963	0	7257	0	42264	78	HFF_MyC-DS15079.twopass.merge150.wgt10.zgt2.wig	HFF-Myc	foreskin	hotspots	Hotspots
79	1e-14	1	1	-9.98083e-18	5593.34	-10963	10963	0	7257	0	42264	78	HFF_MyC-DS15079.twopass.merge150.wgt10.zgt2.wig	HFF-Myc	foreskin	hotspots	Hotspots
79	1e-16	1	1	-9.98083e-18	5593.34	-10963	10963	0	7257	0	42264	78	HFF_MyC-DS15079.twopass.merge150.wgt10.zgt2.wig	HFF-Myc	foreskin	hotspots	Hotspots
79	1e-18	1	1	-9.98083e-18	5593.34	-10963	10963	0	7257	0	42264	78	HFF_MyC-DS15079.twopass.merge150.wgt10.zgt2.wig	HFF-Myc	foreskin	hotspots	Hotspots
79	1e-20	1	1	-9.98083e-18	5593.34	-10963	10963	0	7257	0	42264	78	HFF_MyC-DS15079.twopass.merge150.wgt10.zgt2.wig	HFF-Myc	foreskin	hotspots	Hotspots
80	0.01	1.1622	0.231765	0.150316	0.1257	-0.0960571	0.396688	109	5421	750	42264	79	HGF-DS11752.twopass.merge150.wgt10.zgt2.wig	HGF	gingival	hotspots	Hotspots
80	0.0001	3.3205	0.0109357	1.20011	0.471605	0.275769	2.12446	12	5421	36	42264	79	HGF-DS11752.twopass.merge150.wgt10.zgt2.wig	HGF	gingival	hotspots	Hotspots
80	1e-06	5.24795e-07	0.996628	-14.4603	3421.24	-6720.1	6691.18	0	5421	3	42264	79	HGF-DS11752.twopass.merge150.wgt10.zgt2.wig	HGF	gingival	hotspots	Hotspots
80	1e-08	1.63231e-06	0.996722	-13.3255	3243.09	-6369.78	6343.13	0	5421	2	42264	79	HGF-DS11752.twopass.merge150.wgt10.zgt2.wig	HGF	gingival	hotspots	Hotspots
80	1e-10	1	1	-3.92425e-18	6249.29	-12248.6	12248.6	0	5421	0	42264	79	HGF-DS11752.twopass.merge150.wgt10.zgt2.wig	HGF	gingival	hotspots	Hotspots
80	1e-12	1	1	-3.92425e-18	6249.29	-12248.6	12248.6	0	5421	0	42264	79	HGF-DS11752.twopass.merge150.wgt10.zgt2.wig	HGF	gingival	hotspots	Hotspots
80	1e-14	1	1	-3.92425e-18	6249.29	-12248.6	12248.6	0	5421	0	42264	79	HGF-DS11752.twopass.merge150.wgt10.zgt2.wig	HGF	gingival	hotspots	Hotspots
80	1e-16	1	1	-3.92425e-18	6249.29	-12248.6	12248.6	0	5421	0	42264	79	HGF-DS11752.twopass.merge150.wgt10.zgt2.wig	HGF	gingival	hotspots	Hotspots
80	1e-18	1	1	-3.92425e-18	6249.29	-12248.6	12248.6	0	5421	0	42264	79	HGF-DS11752.twopass.merge150.wgt10.zgt2.wig	HGF	gingival	hotspots	Hotspots
80	1e-20	1	1	-3.92425e-18	6249.29	-12248.6	12248.6	0	5421	0	42264	79	HGF-DS11752.twopass.merge150.wgt10.zgt2.wig	HGF	gingival	hotspots	Hotspots
81	0.01	1.09038	0.469237	0.0865249	0.119556	-0.147804	0.320854	126	6684	750	42264	80	HIPEpiC-DS12684.twopass.merge150.wgt10.zgt2.wig	HIPEpiC	epithelium	hotspots	Hotspots
81	0.0001	1.51424	0.402761	0.414917	0.495896	-0.557039	1.38687	10	6684	36	42264	80	HIPEpiC-DS12684.twopass.merge150.wgt10.zgt2.wig	HIPEpiC	epithelium	hotspots	Hotspots
81	1e-06	5.65741e-07	0.996272	-14.3851	3079.01	-6049.25	6020.48	0	6684	3	42264	80	HIPEpiC-DS12684.twopass.merge150.wgt10.zgt2.wig	HIPEpiC	epithelium	hotspots	Hotspots
81	1e-08	1.09851e-06	0.996276	-13.7216	2940.15	-5776.42	5748.97	0	6684	2	42264	80	HIPEpiC-DS12684.twopass.merge150.wgt10.zgt2.wig	HIPEpiC	epithelium	hotspots	Hotspots
81	1e-10	1	1	-3.09032e-18	5819.83	-11406.9	11406.9	0	6684	0	42264	80	HIPEpiC-DS12684.twopass.merge150.wgt10.zgt2.wig	HIPEpiC	epithelium	hotspots	Hotspots
81	1e-12	1	1	-3.09032e-18	5819.83	-11406.9	11406.9	0	6684	0	42264	80	HIPEpiC-DS12684.twopass.merge150.wgt10.zgt2.wig	HIPEpiC	epithelium	hotspots	Hotspots
81	1e-14	1	1	-3.09032e-18	5819.83	-11406.9	11406.9	0	6684	0	42264	80	HIPEpiC-DS12684.twopass.merge150.wgt10.zgt2.wig	HIPEpiC	epithelium	hotspots	Hotspots
81	1e-16	1	1	-3.09032e-18	5819.83	-11406.9	11406.9	0	6684	0	42264	80	HIPEpiC-DS12684.twopass.merge150.wgt10.zgt2.wig	HIPEpiC	epithelium	hotspots	Hotspots
81	1e-18	1	1	-3.09032e-18	5819.83	-11406.9	11406.9	0	6684	0	42264	80	HIPEpiC-DS12684.twopass.merge150.wgt10.zgt2.wig	HIPEpiC	epithelium	hotspots	Hotspots
81	1e-20	1	1	-3.09032e-18	5819.83	-11406.9	11406.9	0	6684	0	42264	80	HIPEpiC-DS12684.twopass.merge150.wgt10.zgt2.wig	HIPEpiC	epithelium	hotspots	Hotspots
82	0.01	1.12664	0.322978	0.119236	0.120641	-0.11722	0.355691	116	5589	750	42264	81	HL60-DS11809.twopass.merge150.wgt10.zgt2.wig	HL-60	blood	hotspots	Hotspots
82	0.0001	1.77061	0.222819	0.571325	0.468658	-0.347245	1.4899	10	5589	36	42264	81	HL60-DS11809.twopass.merge150.wgt10.zgt2.wig	HL-60	blood	hotspots	Hotspots
82	1e-06	4.40059e-07	0.996455	-14.6364	3294.03	-6470.93	6441.66	0	5589	3	42264	81	HL60-DS11809.twopass.merge150.wgt10.zgt2.wig	HL-60	blood	hotspots	Hotspots
82	1e-08	7.62133e-07	0.996423	-14.0871	3141.86	-6172.14	6143.97	0	5589	2	42264	81	HL60-DS11809.twopass.merge150.wgt10.zgt2.wig	HL-60	blood	hotspots	Hotspots
82	1e-10	1	1	4.99856e-18	5926.26	-11615.5	11615.5	0	5589	0	42264	81	HL60-DS11809.twopass.merge150.wgt10.zgt2.wig	HL-60	blood	hotspots	Hotspots
82	1e-12	1	1	4.99856e-18	5926.26	-11615.5	11615.5	0	5589	0	42264	81	HL60-DS11809.twopass.merge150.wgt10.zgt2.wig	HL-60	blood	hotspots	Hotspots
82	1e-14	1	1	4.99856e-18	5926.26	-11615.5	11615.5	0	5589	0	42264	81	HL60-DS11809.twopass.merge150.wgt10.zgt2.wig	HL-60	blood	hotspots	Hotspots
82	1e-16	1	1	4.99856e-18	5926.26	-11615.5	11615.5	0	5589	0	42264	81	HL60-DS11809.twopass.merge150.wgt10.zgt2.wig	HL-60	blood	hotspots	Hotspots
82	1e-18	1	1	4.99856e-18	5926.26	-11615.5	11615.5	0	5589	0	42264	81	HL60-DS11809.twopass.merge150.wgt10.zgt2.wig	HL-60	blood	hotspots	Hotspots
82	1e-20	1	1	4.99856e-18	5926.26	-11615.5	11615.5	0	5589	0	42264	81	HL60-DS11809.twopass.merge150.wgt10.zgt2.wig	HL-60	blood	hotspots	Hotspots
83	0.01	1.14759	0.204937	0.137662	0.108599	-0.0751932	0.350516	176	9064	750	42264	82	HMEC-all.twopass.merge150.wgt10.zgt2.wig	HMEC	breast	hotspots	Hotspots
83	0.0001	1.46829	0.419356	0.384099	0.475641	-0.548157	1.31635	11	9064	36	42264	82	HMEC-all.twopass.merge150.wgt10.zgt2.wig	HMEC	breast	hotspots	Hotspots
83	1e-06	6.15583e-07	0.99571	-14.3007	2659.46	-5226.85	5198.25	0	9064	3	42264	82	HMEC-all.twopass.merge150.wgt10.zgt2.wig	HMEC	breast	hotspots	Hotspots
83	1e-08	1.70728e-06	0.995807	-13.2806	2527.34	-4966.87	4940.31	0	9064	2	42264	82	HMEC-all.twopass.merge150.wgt10.zgt2.wig	HMEC	breast	hotspots	Hotspots
83	1e-10	1	1	-2.96323e-17	5268.6	-10326.5	10326.5	0	9064	0	42264	82	HMEC-all.twopass.merge150.wgt10.zgt2.wig	HMEC	breast	hotspots	Hotspots
83	1e-12	1	1	-2.96323e-17	5268.6	-10326.5	10326.5	0	9064	0	42264	82	HMEC-all.twopass.merge150.wgt10.zgt2.wig	HMEC	breast	hotspots	Hotspots
83	1e-14	1	1	-2.96323e-17	5268.6	-10326.5	10326.5	0	9064	0	42264	82	HMEC-all.twopass.merge150.wgt10.zgt2.wig	HMEC	breast	hotspots	Hotspots
83	1e-16	1	1	-2.96323e-17	5268.6	-10326.5	10326.5	0	9064	0	42264	82	HMEC-all.twopass.merge150.wgt10.zgt2.wig	HMEC	breast	hotspots	Hotspots
83	1e-18	1	1	-2.96323e-17	5268.6	-10326.5	10326.5	0	9064	0	42264	82	HMEC-all.twopass.merge150.wgt10.zgt2.wig	HMEC	breast	hotspots	Hotspots
83	1e-20	1	1	-2.96323e-17	5268.6	-10326.5	10326.5	0	9064	0	42264	82	HMEC-all.twopass.merge150.wgt10.zgt2.wig	HMEC	breast	hotspots	Hotspots
84	0.01	1.11073	0.404866	0.10502	0.12608	-0.142097	0.352136	110	5529	750	42264	83	HMF-DS13363.twopass.merge150.wgt10.zgt2.wig	HMF	breast	hotspots	Hotspots
84	0.0001	2.00915	0.155114	0.697713	0.49076	-0.264177	1.6596	9	5529	36	42264	83	HMF-DS13363.twopass.merge150.wgt10.zgt2.wig	HMF	breast	hotspots	Hotspots
84	1e-06	5.83153e-07	0.996611	-14.3548	3379.9	-6638.96	6610.25	0	5529	3	42264	83	HMF-DS13363.twopass.merge150.wgt10.zgt2.wig	HMF	breast	hotspots	Hotspots
84	1e-08	1.22938e-06	0.996633	-13.609	3224.71	-6334.05	6306.83	0	5529	2	42264	83	HMF-DS13363.twopass.merge150.wgt10.zgt2.wig	HMF	breast	hotspots	Hotspots
84	1e-10	1	1	7.04077e-18	6207.46	-12166.6	12166.6	0	5529	0	42264	83	HMF-DS13363.twopass.merge150.wgt10.zgt2.wig	HMF	breast	hotspots	Hotspots
84	1e-12	1	1	7.04077e-18	6207.46	-12166.6	12166.6	0	5529	0	42264	83	HMF-DS13363.twopass.merge150.wgt10.zgt2.wig	HMF	breast	hotspots	Hotspots
84	1e-14	1	1	7.04077e-18	6207.46	-12166.6	12166.6	0	5529	0	42264	83	HMF-DS13363.twopass.merge150.wgt10.zgt2.wig	HMF	breast	hotspots	Hotspots
84	1e-16	1	1	7.04077e-18	6207.46	-12166.6	12166.6	0	5529	0	42264	83	HMF-DS13363.twopass.merge150.wgt10.zgt2.wig	HMF	breast	hotspots	Hotspots
84	1e-18	1	1	7.04077e-18	6207.46	-12166.6	12166.6	0	5529	0	42264	83	HMF-DS13363.twopass.merge150.wgt10.zgt2.wig	HMF	breast	hotspots	Hotspots
84	1e-20	1	1	7.04077e-18	6207.46	-12166.6	12166.6	0	5529	0	42264	83	HMF-DS13363.twopass.merge150.wgt10.zgt2.wig	HMF	breast	hotspots	Hotspots
85	0.01	1.40252	0.00407009	0.338267	0.117753	0.107471	0.569064	126	5610	750	42264	84	HMVEC_dAd-DS12957.hg19.twopass.merge150.wgt10.zgt2.wig	HMVEC-dAd	blood_vessel	hotspots	Hotspots
85	0.0001	1.92486	0.178135	0.654855	0.486331	-0.298355	1.60806	9	5610	36	42264	84	HMVEC_dAd-DS12957.hg19.twopass.merge150.wgt10.zgt2.wig	HMVEC-dAd	blood_vessel	hotspots	Hotspots
85	1e-06	7.07661e-07	0.996571	-14.1613	3295.26	-6472.87	6444.55	0	5610	3	42264	84	HMVEC_dAd-DS12957.hg19.twopass.merge150.wgt10.zgt2.wig	HMVEC-dAd	blood_vessel	hotspots	Hotspots
85	1e-08	1.74856e-06	0.996624	-13.2567	3133.42	-6154.77	6128.25	0	5610	2	42264	84	HMVEC_dAd-DS12957.hg19.twopass.merge150.wgt10.zgt2.wig	HMVEC-dAd	blood_vessel	hotspots	Hotspots
85	1e-10	1	1	3.0502e-17	6073.91	-11904.9	11904.9	0	5610	0	42264	84	HMVEC_dAd-DS12957.hg19.twopass.merge150.wgt10.zgt2.wig	HMVEC-dAd	blood_vessel	hotspots	Hotspots
85	1e-12	1	1	3.0502e-17	6073.91	-11904.9	11904.9	0	5610	0	42264	84	HMVEC_dAd-DS12957.hg19.twopass.merge150.wgt10.zgt2.wig	HMVEC-dAd	blood_vessel	hotspots	Hotspots
85	1e-14	1	1	3.0502e-17	6073.91	-11904.9	11904.9	0	5610	0	42264	84	HMVEC_dAd-DS12957.hg19.twopass.merge150.wgt10.zgt2.wig	HMVEC-dAd	blood_vessel	hotspots	Hotspots
85	1e-16	1	1	3.0502e-17	6073.91	-11904.9	11904.9	0	5610	0	42264	84	HMVEC_dAd-DS12957.hg19.twopass.merge150.wgt10.zgt2.wig	HMVEC-dAd	blood_vessel	hotspots	Hotspots
85	1e-18	1	1	3.0502e-17	6073.91	-11904.9	11904.9	0	5610	0	42264	84	HMVEC_dAd-DS12957.hg19.twopass.merge150.wgt10.zgt2.wig	HMVEC-dAd	blood_vessel	hotspots	Hotspots
85	1e-20	1	1	3.0502e-17	6073.91	-11904.9	11904.9	0	5610	0	42264	84	HMVEC_dAd-DS12957.hg19.twopass.merge150.wgt10.zgt2.wig	HMVEC-dAd	blood_vessel	hotspots	Hotspots
86	0.01	1.31271	0.0230797	0.272091	0.119752	0.0373762	0.506805	121	5483	750	42264	85	HMVEC_dBlAd-DS13337.twopass.merge150.wgt10.zgt2.wig	HMVEC-dBl-Ad	blood_vessel	hotspots	Hotspots
86	0.0001	3.0452	0.0165041	1.11357	0.464456	0.203234	2.0239	11	5483	36	42264	85	HMVEC_dBlAd-DS13337.twopass.merge150.wgt10.zgt2.wig	HMVEC-dBl-Ad	blood_vessel	hotspots	Hotspots
86	1e-06	5.9344e-07	0.996579	-14.3373	3344.29	-6569.15	6540.47	0	5483	3	42264	85	HMVEC_dBlAd-DS13337.twopass.merge150.wgt10.zgt2.wig	HMVEC-dBl-Ad	blood_vessel	hotspots	Hotspots
86	1e-08	1.52839e-06	0.996636	-13.3913	3175.75	-6237.86	6211.08	0	5483	2	42264	85	HMVEC_dBlAd-DS13337.twopass.merge150.wgt10.zgt2.wig	HMVEC-dBl-Ad	blood_vessel	hotspots	Hotspots
86	1e-10	1	1	3.35073e-17	6093.6	-11943.5	11943.5	0	5483	0	42264	85	HMVEC_dBlAd-DS13337.twopass.merge150.wgt10.zgt2.wig	HMVEC-dBl-Ad	blood_vessel	hotspots	Hotspots
86	1e-12	1	1	3.35073e-17	6093.6	-11943.5	11943.5	0	5483	0	42264	85	HMVEC_dBlAd-DS13337.twopass.merge150.wgt10.zgt2.wig	HMVEC-dBl-Ad	blood_vessel	hotspots	Hotspots
86	1e-14	1	1	3.35073e-17	6093.6	-11943.5	11943.5	0	5483	0	42264	85	HMVEC_dBlAd-DS13337.twopass.merge150.wgt10.zgt2.wig	HMVEC-dBl-Ad	blood_vessel	hotspots	Hotspots
86	1e-16	1	1	3.35073e-17	6093.6	-11943.5	11943.5	0	5483	0	42264	85	HMVEC_dBlAd-DS13337.twopass.merge150.wgt10.zgt2.wig	HMVEC-dBl-Ad	blood_vessel	hotspots	Hotspots
86	1e-18	1	1	3.35073e-17	6093.6	-11943.5	11943.5	0	5483	0	42264	85	HMVEC_dBlAd-DS13337.twopass.merge150.wgt10.zgt2.wig	HMVEC-dBl-Ad	blood_vessel	hotspots	Hotspots
86	1e-20	1	1	3.35073e-17	6093.6	-11943.5	11943.5	0	5483	0	42264	85	HMVEC_dBlAd-DS13337.twopass.merge150.wgt10.zgt2.wig	HMVEC-dBl-Ad	blood_vessel	hotspots	Hotspots
87	0.01	1.29154	0.0249595	0.255833	0.114108	0.0321817	0.479484	138	6353	750	42264	86	HMVEC_dBlNeo-DS13242.twopass.merge150.wgt10.zgt2.wig	HMVEC-dBl-Neo	blood_vessel	hotspots	Hotspots
87	0.0001	2.4325	0.0537131	0.888921	0.460786	-0.0142185	1.79206	11	6353	36	42264	86	HMVEC_dBlNeo-DS13242.twopass.merge150.wgt10.zgt2.wig	HMVEC-dBl-Neo	blood_vessel	hotspots	Hotspots
87	1e-06	6.3914e-07	0.99635	-14.2631	3118.06	-6125.67	6097.14	0	6353	3	42264	86	HMVEC_dBlNeo-DS13242.twopass.merge150.wgt10.zgt2.wig	HMVEC-dBl-Neo	blood_vessel	hotspots	Hotspots
87	1e-08	2.22078e-06	0.996482	-13.0177	2952.56	-5800.04	5774.01	0	6353	2	42264	86	HMVEC_dBlNeo-DS13242.twopass.merge150.wgt10.zgt2.wig	HMVEC-dBl-Neo	blood_vessel	hotspots	Hotspots
87	1e-10	1	1	2.45089e-17	5742.94	-11256.2	11256.2	0	6353	0	42264	86	HMVEC_dBlNeo-DS13242.twopass.merge150.wgt10.zgt2.wig	HMVEC-dBl-Neo	blood_vessel	hotspots	Hotspots
87	1e-12	1	1	2.45089e-17	5742.94	-11256.2	11256.2	0	6353	0	42264	86	HMVEC_dBlNeo-DS13242.twopass.merge150.wgt10.zgt2.wig	HMVEC-dBl-Neo	blood_vessel	hotspots	Hotspots
87	1e-14	1	1	2.45089e-17	5742.94	-11256.2	11256.2	0	6353	0	42264	86	HMVEC_dBlNeo-DS13242.twopass.merge150.wgt10.zgt2.wig	HMVEC-dBl-Neo	blood_vessel	hotspots	Hotspots
87	1e-16	1	1	2.45089e-17	5742.94	-11256.2	11256.2	0	6353	0	42264	86	HMVEC_dBlNeo-DS13242.twopass.merge150.wgt10.zgt2.wig	HMVEC-dBl-Neo	blood_vessel	hotspots	Hotspots
87	1e-18	1	1	2.45089e-17	5742.94	-11256.2	11256.2	0	6353	0	42264	86	HMVEC_dBlNeo-DS13242.twopass.merge150.wgt10.zgt2.wig	HMVEC-dBl-Neo	blood_vessel	hotspots	Hotspots
87	1e-20	1	1	2.45089e-17	5742.94	-11256.2	11256.2	0	6353	0	42264	86	HMVEC_dBlNeo-DS13242.twopass.merge150.wgt10.zgt2.wig	HMVEC-dBl-Neo	blood_vessel	hotspots	Hotspots
88	0.01	1.31993	0.0285537	0.277575	0.12677	0.0291056	0.526045	101	4606	750	42264	87	HMVEC_dLyAd-DS13261.twopass.merge150.wgt10.zgt2.wig	HMVEC-dLy-Ad	blood_vessel	hotspots	Hotspots
88	0.0001	2.4985	0.0592687	0.91569	0.485469	-0.03583	1.86721	9	4606	36	42264	87	HMVEC_dLyAd-DS13261.twopass.merge150.wgt10.zgt2.wig	HMVEC-dLy-Ad	blood_vessel	hotspots	Hotspots
88	1e-06	7.53603e-07	0.996893	-14.0984	3620.17	-7109.64	7081.44	0	4606	3	42264	87	HMVEC_dLyAd-DS13261.twopass.merge150.wgt10.zgt2.wig	HMVEC-dLy-Ad	blood_vessel	hotspots	Hotspots
88	1e-08	2.20292e-06	0.996971	-13.0257	3431.25	-6738.27	6712.22	0	4606	2	42264	87	HMVEC_dLyAd-DS13261.twopass.merge150.wgt10.zgt2.wig	HMVEC-dLy-Ad	blood_vessel	hotspots	Hotspots
88	1e-10	1	1	5.15247e-17	6526.87	-12792.7	12792.7	0	4606	0	42264	87	HMVEC_dLyAd-DS13261.twopass.merge150.wgt10.zgt2.wig	HMVEC-dLy-Ad	blood_vessel	hotspots	Hotspots
88	1e-12	1	1	5.15247e-17	6526.87	-12792.7	12792.7	0	4606	0	42264	87	HMVEC_dLyAd-DS13261.twopass.merge150.wgt10.zgt2.wig	HMVEC-dLy-Ad	blood_vessel	hotspots	Hotspots
88	1e-14	1	1	5.15247e-17	6526.87	-12792.7	12792.7	0	4606	0	42264	87	HMVEC_dLyAd-DS13261.twopass.merge150.wgt10.zgt2.wig	HMVEC-dLy-Ad	blood_vessel	hotspots	Hotspots
88	1e-16	1	1	5.15247e-17	6526.87	-12792.7	12792.7	0	4606	0	42264	87	HMVEC_dLyAd-DS13261.twopass.merge150.wgt10.zgt2.wig	HMVEC-dLy-Ad	blood_vessel	hotspots	Hotspots
88	1e-18	1	1	5.15247e-17	6526.87	-12792.7	12792.7	0	4606	0	42264	87	HMVEC_dLyAd-DS13261.twopass.merge150.wgt10.zgt2.wig	HMVEC-dLy-Ad	blood_vessel	hotspots	Hotspots
88	1e-20	1	1	5.15247e-17	6526.87	-12792.7	12792.7	0	4606	0	42264	87	HMVEC_dLyAd-DS13261.twopass.merge150.wgt10.zgt2.wig	HMVEC-dLy-Ad	blood_vessel	hotspots	Hotspots
89	0.01	1.30325	0.0272599	0.26486	0.119967	0.0297249	0.499996	119	5477	750	42264	88	HMVEC_dLyNeo-DS13150.twopass.merge150.wgt10.zgt2.wig	HMVEC-dLy-Neo	blood_vessel	hotspots	Hotspots
89	0.0001	2.49597	0.0532189	0.914676	0.473156	-0.0127088	1.84206	10	5477	36	42264	88	HMVEC_dLyNeo-DS13150.twopass.merge150.wgt10.zgt2.wig	HMVEC-dLy-Neo	blood_vessel	hotspots	Hotspots
89	1e-06	5.68685e-07	0.99658	-14.3799	3355.23	-6590.63	6561.87	0	5477	3	42264	88	HMVEC_dLyNeo-DS13150.twopass.merge150.wgt10.zgt2.wig	HMVEC-dLy-Neo	blood_vessel	hotspots	Hotspots
89	1e-08	1.92691e-06	0.996687	-13.1596	3169.73	-6225.83	6199.51	0	5477	2	42264	88	HMVEC_dLyNeo-DS13150.twopass.merge150.wgt10.zgt2.wig	HMVEC-dLy-Neo	blood_vessel	hotspots	Hotspots
89	1e-10	1	1	5.0783e-17	6101.74	-11959.4	11959.4	0	5477	0	42264	88	HMVEC_dLyNeo-DS13150.twopass.merge150.wgt10.zgt2.wig	HMVEC-dLy-Neo	blood_vessel	hotspots	Hotspots
89	1e-12	1	1	5.0783e-17	6101.74	-11959.4	11959.4	0	5477	0	42264	88	HMVEC_dLyNeo-DS13150.twopass.merge150.wgt10.zgt2.wig	HMVEC-dLy-Neo	blood_vessel	hotspots	Hotspots
89	1e-14	1	1	5.0783e-17	6101.74	-11959.4	11959.4	0	5477	0	42264	88	HMVEC_dLyNeo-DS13150.twopass.merge150.wgt10.zgt2.wig	HMVEC-dLy-Neo	blood_vessel	hotspots	Hotspots
89	1e-16	1	1	5.0783e-17	6101.74	-11959.4	11959.4	0	5477	0	42264	88	HMVEC_dLyNeo-DS13150.twopass.merge150.wgt10.zgt2.wig	HMVEC-dLy-Neo	blood_vessel	hotspots	Hotspots
89	1e-18	1	1	5.0783e-17	6101.74	-11959.4	11959.4	0	5477	0	42264	88	HMVEC_dLyNeo-DS13150.twopass.merge150.wgt10.zgt2.wig	HMVEC-dLy-Neo	blood_vessel	hotspots	Hotspots
89	1e-20	1	1	5.0783e-17	6101.74	-11959.4	11959.4	0	5477	0	42264	88	HMVEC_dLyNeo-DS13150.twopass.merge150.wgt10.zgt2.wig	HMVEC-dLy-Neo	blood_vessel	hotspots	Hotspots
90	0.01	1.29749	0.0338384	0.260434	0.122731	0.0198814	0.500986	113	5137	750	42264	89	HMVEC_dNeo-DS12937.twopass.merge150.wgt10.zgt2.wig	HMVEC-dNeo	blood_vessel	hotspots	Hotspots
90	0.0001	2.11045	0.122583	0.746902	0.483738	-0.201224	1.69503	9	5137	36	42264	89	HMVEC_dNeo-DS12937.twopass.merge150.wgt10.zgt2.wig	HMVEC-dNeo	blood_vessel	hotspots	Hotspots
90	1e-06	6.54265e-07	0.996699	-14.2398	3441.95	-6760.47	6731.99	0	5137	3	42264	89	HMVEC_dNeo-DS12937.twopass.merge150.wgt10.zgt2.wig	HMVEC-dNeo	blood_vessel	hotspots	Hotspots
90	1e-08	2.45165e-06	0.996831	-12.9187	3252.53	-6387.88	6362.04	0	5137	2	42264	89	HMVEC_dNeo-DS12937.twopass.merge150.wgt10.zgt2.wig	HMVEC-dNeo	blood_vessel	hotspots	Hotspots
90	1e-10	1	1	2.65176e-17	6250.76	-12251.5	12251.5	0	5137	0	42264	89	HMVEC_dNeo-DS12937.twopass.merge150.wgt10.zgt2.wig	HMVEC-dNeo	blood_vessel	hotspots	Hotspots
90	1e-12	1	1	2.65176e-17	6250.76	-12251.5	12251.5	0	5137	0	42264	89	HMVEC_dNeo-DS12937.twopass.merge150.wgt10.zgt2.wig	HMVEC-dNeo	blood_vessel	hotspots	Hotspots
90	1e-14	1	1	2.65176e-17	6250.76	-12251.5	12251.5	0	5137	0	42264	89	HMVEC_dNeo-DS12937.twopass.merge150.wgt10.zgt2.wig	HMVEC-dNeo	blood_vessel	hotspots	Hotspots
90	1e-16	1	1	2.65176e-17	6250.76	-12251.5	12251.5	0	5137	0	42264	89	HMVEC_dNeo-DS12937.twopass.merge150.wgt10.zgt2.wig	HMVEC-dNeo	blood_vessel	hotspots	Hotspots
90	1e-18	1	1	2.65176e-17	6250.76	-12251.5	12251.5	0	5137	0	42264	89	HMVEC_dNeo-DS12937.twopass.merge150.wgt10.zgt2.wig	HMVEC-dNeo	blood_vessel	hotspots	Hotspots
90	1e-20	1	1	2.65176e-17	6250.76	-12251.5	12251.5	0	5137	0	42264	89	HMVEC_dNeo-DS12937.twopass.merge150.wgt10.zgt2.wig	HMVEC-dNeo	blood_vessel	hotspots	Hotspots
91	0.01	1.28908	0.03	0.25393	0.117013	0.0245835	0.483276	130	5993	750	42264	90	HMVEC_LBl-DS13372.twopass.merge150.wgt10.zgt2.wig	HMVEC-LBl	blood_vessel	hotspots	Hotspots
91	0.0001	2.15823	0.102597	0.76929	0.471265	-0.15439	1.69297	10	5993	36	42264	90	HMVEC_LBl-DS13372.twopass.merge150.wgt10.zgt2.wig	HMVEC-LBl	blood_vessel	hotspots	Hotspots
91	1e-06	5.67573e-07	0.996442	-14.3819	3224.81	-6335.01	6306.25	0	5993	3	42264	90	HMVEC_LBl-DS13372.twopass.merge150.wgt10.zgt2.wig	HMVEC-LBl	blood_vessel	hotspots	Hotspots
91	1e-08	1.64826e-06	0.996526	-13.3158	3058.09	-6007.18	5980.55	0	5993	2	42264	90	HMVEC_LBl-DS13372.twopass.merge150.wgt10.zgt2.wig	HMVEC-LBl	blood_vessel	hotspots	Hotspots
91	1e-10	1	1	1.42557e-17	5911.69	-11586.9	11586.9	0	5993	0	42264	90	HMVEC_LBl-DS13372.twopass.merge150.wgt10.zgt2.wig	HMVEC-LBl	blood_vessel	hotspots	Hotspots
91	1e-12	1	1	1.42557e-17	5911.69	-11586.9	11586.9	0	5993	0	42264	90	HMVEC_LBl-DS13372.twopass.merge150.wgt10.zgt2.wig	HMVEC-LBl	blood_vessel	hotspots	Hotspots
91	1e-14	1	1	1.42557e-17	5911.69	-11586.9	11586.9	0	5993	0	42264	90	HMVEC_LBl-DS13372.twopass.merge150.wgt10.zgt2.wig	HMVEC-LBl	blood_vessel	hotspots	Hotspots
91	1e-16	1	1	1.42557e-17	5911.69	-11586.9	11586.9	0	5993	0	42264	90	HMVEC_LBl-DS13372.twopass.merge150.wgt10.zgt2.wig	HMVEC-LBl	blood_vessel	hotspots	Hotspots
91	1e-18	1	1	1.42557e-17	5911.69	-11586.9	11586.9	0	5993	0	42264	90	HMVEC_LBl-DS13372.twopass.merge150.wgt10.zgt2.wig	HMVEC-LBl	blood_vessel	hotspots	Hotspots
91	1e-20	1	1	1.42557e-17	5911.69	-11586.9	11586.9	0	5993	0	42264	90	HMVEC_LBl-DS13372.twopass.merge150.wgt10.zgt2.wig	HMVEC-LBl	blood_vessel	hotspots	Hotspots
92	0.01	1.2269	0.0908671	0.204489	0.120939	-0.0325518	0.441529	117	5474	750	42264	91	HMVEC_LLy-DS13185.twopass.merge150.wgt10.zgt2.wig	HMVEC-LLy	blood_vessel	hotspots	Hotspots
92	0.0001	1.95448	0.160829	0.670124	0.477879	-0.266519	1.60677	10	5474	36	42264	91	HMVEC_LLy-DS13185.twopass.merge150.wgt10.zgt2.wig	HMVEC-LLy	blood_vessel	hotspots	Hotspots
92	1e-06	6.20798e-07	0.99659	-14.2923	3344.14	-6568.8	6540.21	0	5474	3	42264	91	HMVEC_LLy-DS13185.twopass.merge150.wgt10.zgt2.wig	HMVEC-LLy	blood_vessel	hotspots	Hotspots
92	1e-08	1.70715e-06	0.996659	-13.2807	3171.2	-6228.84	6202.28	0	5474	2	42264	91	HMVEC_LLy-DS13185.twopass.merge150.wgt10.zgt2.wig	HMVEC-LLy	blood_vessel	hotspots	Hotspots
92	1e-10	1	1	3.83294e-17	6071.79	-11900.7	11900.7	0	5474	0	42264	91	HMVEC_LLy-DS13185.twopass.merge150.wgt10.zgt2.wig	HMVEC-LLy	blood_vessel	hotspots	Hotspots
92	1e-12	1	1	3.83294e-17	6071.79	-11900.7	11900.7	0	5474	0	42264	91	HMVEC_LLy-DS13185.twopass.merge150.wgt10.zgt2.wig	HMVEC-LLy	blood_vessel	hotspots	Hotspots
92	1e-14	1	1	3.83294e-17	6071.79	-11900.7	11900.7	0	5474	0	42264	91	HMVEC_LLy-DS13185.twopass.merge150.wgt10.zgt2.wig	HMVEC-LLy	blood_vessel	hotspots	Hotspots
92	1e-16	1	1	3.83294e-17	6071.79	-11900.7	11900.7	0	5474	0	42264	91	HMVEC_LLy-DS13185.twopass.merge150.wgt10.zgt2.wig	HMVEC-LLy	blood_vessel	hotspots	Hotspots
92	1e-18	1	1	3.83294e-17	6071.79	-11900.7	11900.7	0	5474	0	42264	91	HMVEC_LLy-DS13185.twopass.merge150.wgt10.zgt2.wig	HMVEC-LLy	blood_vessel	hotspots	Hotspots
92	1e-20	1	1	3.83294e-17	6071.79	-11900.7	11900.7	0	5474	0	42264	91	HMVEC_LLy-DS13185.twopass.merge150.wgt10.zgt2.wig	HMVEC-LLy	blood_vessel	hotspots	Hotspots
93	0.01	1.07208	0.563152	0.069596	0.120374	-0.166336	0.305528	127	6754	750	42264	92	HNPCEpiC-DS12467.twopass.merge150.wgt10.zgt2.wig	HNPCEpiC	epithelium	hotspots	Hotspots
93	0.0001	1.98684	0.158899	0.686544	0.487331	-0.268624	1.64171	11	6754	36	42264	92	HNPCEpiC-DS12467.twopass.merge150.wgt10.zgt2.wig	HNPCEpiC	epithelium	hotspots	Hotspots
93	1e-06	7.5361e-07	0.996328	-14.0984	3063.59	-6018.74	5990.54	0	6754	3	42264	92	HNPCEpiC-DS12467.twopass.merge150.wgt10.zgt2.wig	HNPCEpiC	epithelium	hotspots	Hotspots
93	1e-08	1.80388e-06	0.99639	-13.2256	2923.21	-5742.71	5716.26	0	6754	2	42264	92	HNPCEpiC-DS12467.twopass.merge150.wgt10.zgt2.wig	HNPCEpiC	epithelium	hotspots	Hotspots
93	1e-10	1	1	-2.00407e-17	5840.31	-11447	11447	0	6754	0	42264	92	HNPCEpiC-DS12467.twopass.merge150.wgt10.zgt2.wig	HNPCEpiC	epithelium	hotspots	Hotspots
93	1e-12	1	1	-2.00407e-17	5840.31	-11447	11447	0	6754	0	42264	92	HNPCEpiC-DS12467.twopass.merge150.wgt10.zgt2.wig	HNPCEpiC	epithelium	hotspots	Hotspots
93	1e-14	1	1	-2.00407e-17	5840.31	-11447	11447	0	6754	0	42264	92	HNPCEpiC-DS12467.twopass.merge150.wgt10.zgt2.wig	HNPCEpiC	epithelium	hotspots	Hotspots
93	1e-16	1	1	-2.00407e-17	5840.31	-11447	11447	0	6754	0	42264	92	HNPCEpiC-DS12467.twopass.merge150.wgt10.zgt2.wig	HNPCEpiC	epithelium	hotspots	Hotspots
93	1e-18	1	1	-2.00407e-17	5840.31	-11447	11447	0	6754	0	42264	92	HNPCEpiC-DS12467.twopass.merge150.wgt10.zgt2.wig	HNPCEpiC	epithelium	hotspots	Hotspots
93	1e-20	1	1	-2.00407e-17	5840.31	-11447	11447	0	6754	0	42264	92	HNPCEpiC-DS12467.twopass.merge150.wgt10.zgt2.wig	HNPCEpiC	epithelium	hotspots	Hotspots
94	0.01	1.52584	0.000205378	0.422548	0.113823	0.199454	0.645642	146	6183	750	42264	93	HPAEC-DS12916.hg19.twopass.merge150.wgt10.zgt2.wig	HPAEC	blood_vessel	hotspots	Hotspots
94	0.0001	2.17531	0.103092	0.777171	0.476779	-0.157317	1.71166	10	6183	36	42264	93	HPAEC-DS12916.hg19.twopass.merge150.wgt10.zgt2.wig	HPAEC	blood_vessel	hotspots	Hotspots
94	1e-06	5.13071e-07	0.996371	-14.4829	3184.1	-6255.31	6226.35	0	6183	3	42264	93	HPAEC-DS12916.hg19.twopass.merge150.wgt10.zgt2.wig	HPAEC	blood_vessel	hotspots	Hotspots
94	1e-08	1.40042e-06	0.996441	-13.4787	3021.38	-5935.38	5908.42	0	6183	2	42264	93	HPAEC-DS12916.hg19.twopass.merge150.wgt10.zgt2.wig	HPAEC	blood_vessel	hotspots	Hotspots
94	1e-10	1	1	2.35887e-17	5919.57	-11602.4	11602.4	0	6183	0	42264	93	HPAEC-DS12916.hg19.twopass.merge150.wgt10.zgt2.wig	HPAEC	blood_vessel	hotspots	Hotspots
94	1e-12	1	1	2.35887e-17	5919.57	-11602.4	11602.4	0	6183	0	42264	93	HPAEC-DS12916.hg19.twopass.merge150.wgt10.zgt2.wig	HPAEC	blood_vessel	hotspots	Hotspots
94	1e-14	1	1	2.35887e-17	5919.57	-11602.4	11602.4	0	6183	0	42264	93	HPAEC-DS12916.hg19.twopass.merge150.wgt10.zgt2.wig	HPAEC	blood_vessel	hotspots	Hotspots
94	1e-16	1	1	2.35887e-17	5919.57	-11602.4	11602.4	0	6183	0	42264	93	HPAEC-DS12916.hg19.twopass.merge150.wgt10.zgt2.wig	HPAEC	blood_vessel	hotspots	Hotspots
94	1e-18	1	1	2.35887e-17	5919.57	-11602.4	11602.4	0	6183	0	42264	93	HPAEC-DS12916.hg19.twopass.merge150.wgt10.zgt2.wig	HPAEC	blood_vessel	hotspots	Hotspots
94	1e-20	1	1	2.35887e-17	5919.57	-11602.4	11602.4	0	6183	0	42264	93	HPAEC-DS12916.hg19.twopass.merge150.wgt10.zgt2.wig	HPAEC	blood_vessel	hotspots	Hotspots
95	0.01	1.24868	0.0608046	0.222088	0.118452	-0.0100787	0.454254	128	6137	750	42264	94	HPAF-DS13411.twopass.merge150.wgt10.zgt2.wig	HPAF	blood_vessel	hotspots	Hotspots
95	0.0001	1.31344	0.587718	0.272652	0.502914	-0.713059	1.25836	8	6137	36	42264	94	HPAF-DS13411.twopass.merge150.wgt10.zgt2.wig	HPAF	blood_vessel	hotspots	Hotspots
95	1e-06	6.16797e-07	0.996423	-14.2987	3189.58	-6265.87	6237.28	0	6137	3	42264	94	HPAF-DS13411.twopass.merge150.wgt10.zgt2.wig	HPAF	blood_vessel	hotspots	Hotspots
95	1e-08	1.38247e-06	0.99646	-13.4916	3040.93	-5973.7	5946.72	0	6137	2	42264	94	HPAF-DS13411.twopass.merge150.wgt10.zgt2.wig	HPAF	blood_vessel	hotspots	Hotspots
95	1e-10	1	1	5.6532e-18	5937.47	-11637.4	11637.4	0	6137	0	42264	94	HPAF-DS13411.twopass.merge150.wgt10.zgt2.wig	HPAF	blood_vessel	hotspots	Hotspots
95	1e-12	1	1	5.6532e-18	5937.47	-11637.4	11637.4	0	6137	0	42264	94	HPAF-DS13411.twopass.merge150.wgt10.zgt2.wig	HPAF	blood_vessel	hotspots	Hotspots
95	1e-14	1	1	5.6532e-18	5937.47	-11637.4	11637.4	0	6137	0	42264	94	HPAF-DS13411.twopass.merge150.wgt10.zgt2.wig	HPAF	blood_vessel	hotspots	Hotspots
95	1e-16	1	1	5.6532e-18	5937.47	-11637.4	11637.4	0	6137	0	42264	94	HPAF-DS13411.twopass.merge150.wgt10.zgt2.wig	HPAF	blood_vessel	hotspots	Hotspots
95	1e-18	1	1	5.6532e-18	5937.47	-11637.4	11637.4	0	6137	0	42264	94	HPAF-DS13411.twopass.merge150.wgt10.zgt2.wig	HPAF	blood_vessel	hotspots	Hotspots
95	1e-20	1	1	5.6532e-18	5937.47	-11637.4	11637.4	0	6137	0	42264	94	HPAF-DS13411.twopass.merge150.wgt10.zgt2.wig	HPAF	blood_vessel	hotspots	Hotspots
96	0.01	1.18531	0.156738	0.170004	0.120048	-0.0652907	0.405298	122	6066	750	42264	95	HPdLF-DS13573.twopass.merge150.wgt10.zgt2.wig	HPdLF	epithelium	hotspots	Hotspots
96	0.0001	1.38599	0.512939	0.326418	0.498906	-0.651437	1.30427	9	6066	36	42264	95	HPdLF-DS13573.twopass.merge150.wgt10.zgt2.wig	HPdLF	epithelium	hotspots	Hotspots
96	1e-06	5.46573e-07	0.99645	-14.4196	3241.26	-6367.29	6338.45	0	6066	3	42264	95	HPdLF-DS13573.twopass.merge150.wgt10.zgt2.wig	HPdLF	epithelium	hotspots	Hotspots
96	1e-08	1.63277e-06	0.99654	-13.3252	3072.56	-6035.55	6008.9	0	6066	2	42264	95	HPdLF-DS13573.twopass.merge150.wgt10.zgt2.wig	HPdLF	epithelium	hotspots	Hotspots
96	1e-10	1	1	-2.55329e-17	5965.9	-11693.2	11693.2	0	6066	0	42264	95	HPdLF-DS13573.twopass.merge150.wgt10.zgt2.wig	HPdLF	epithelium	hotspots	Hotspots
96	1e-12	1	1	-2.55329e-17	5965.9	-11693.2	11693.2	0	6066	0	42264	95	HPdLF-DS13573.twopass.merge150.wgt10.zgt2.wig	HPdLF	epithelium	hotspots	Hotspots
96	1e-14	1	1	-2.55329e-17	5965.9	-11693.2	11693.2	0	6066	0	42264	95	HPdLF-DS13573.twopass.merge150.wgt10.zgt2.wig	HPdLF	epithelium	hotspots	Hotspots
96	1e-16	1	1	-2.55329e-17	5965.9	-11693.2	11693.2	0	6066	0	42264	95	HPdLF-DS13573.twopass.merge150.wgt10.zgt2.wig	HPdLF	epithelium	hotspots	Hotspots
96	1e-18	1	1	-2.55329e-17	5965.9	-11693.2	11693.2	0	6066	0	42264	95	HPdLF-DS13573.twopass.merge150.wgt10.zgt2.wig	HPdLF	epithelium	hotspots	Hotspots
96	1e-20	1	1	-2.55329e-17	5965.9	-11693.2	11693.2	0	6066	0	42264	95	HPdLF-DS13573.twopass.merge150.wgt10.zgt2.wig	HPdLF	epithelium	hotspots	Hotspots
97	0.01	1.31157	0.0257124	0.271222	0.121595	0.032895	0.509549	116	5445	750	42264	96	HPF-DS13390.twopass.merge150.wgt10.zgt2.wig	HPF	lung	hotspots	Hotspots
97	0.0001	2.61044	0.0451923	0.959519	0.479075	0.0205331	1.89851	10	5445	36	42264	96	HPF-DS13390.twopass.merge150.wgt10.zgt2.wig	HPF	lung	hotspots	Hotspots
97	1e-06	6.08111e-07	0.996627	-14.3129	3386.13	-6651.13	6622.51	0	5445	3	42264	96	HPF-DS13390.twopass.merge150.wgt10.zgt2.wig	HPF	lung	hotspots	Hotspots
97	1e-08	1.34327e-06	0.996656	-13.5204	3226.01	-6336.5	6309.46	0	5445	2	42264	96	HPF-DS13390.twopass.merge150.wgt10.zgt2.wig	HPF	lung	hotspots	Hotspots
97	1e-10	1	1	4.67283e-18	6201.5	-12154.9	12154.9	0	5445	0	42264	96	HPF-DS13390.twopass.merge150.wgt10.zgt2.wig	HPF	lung	hotspots	Hotspots
97	1e-12	1	1	4.67283e-18	6201.5	-12154.9	12154.9	0	5445	0	42264	96	HPF-DS13390.twopass.merge150.wgt10.zgt2.wig	HPF	lung	hotspots	Hotspots
97	1e-14	1	1	4.67283e-18	6201.5	-12154.9	12154.9	0	5445	0	42264	96	HPF-DS13390.twopass.merge150.wgt10.zgt2.wig	HPF	lung	hotspots	Hotspots
97	1e-16	1	1	4.67283e-18	6201.5	-12154.9	12154.9	0	5445	0	42264	96	HPF-DS13390.twopass.merge150.wgt10.zgt2.wig	HPF	lung	hotspots	Hotspots
97	1e-18	1	1	4.67283e-18	6201.5	-12154.9	12154.9	0	5445	0	42264	96	HPF-DS13390.twopass.merge150.wgt10.zgt2.wig	HPF	lung	hotspots	Hotspots
97	1e-20	1	1	4.67283e-18	6201.5	-12154.9	12154.9	0	5445	0	42264	96	HPF-DS13390.twopass.merge150.wgt10.zgt2.wig	HPF	lung	hotspots	Hotspots
98	0.01	1.17099	0.193285	0.157847	0.121334	-0.0799687	0.395662	121	6104	750	42264	97	HRCE-DS10666.twopass.merge150.wgt10.zgt2.wig	HRCEpiC	epithelium	hotspots	Hotspots
98	0.0001	1.3584	0.547946	0.306305	0.509794	-0.692891	1.3055	8	6104	36	42264	97	HRCE-DS10666.twopass.merge150.wgt10.zgt2.wig	HRCEpiC	epithelium	hotspots	Hotspots
98	1e-06	6.6464e-07	0.996471	-14.224	3215.63	-6316.87	6288.42	0	6104	3	42264	97	HRCE-DS10666.twopass.merge150.wgt10.zgt2.wig	HRCEpiC	epithelium	hotspots	Hotspots
98	1e-08	1.35387e-06	0.996491	-13.5125	3072.87	-6036.35	6009.32	0	6104	2	42264	97	HRCE-DS10666.twopass.merge150.wgt10.zgt2.wig	HRCEpiC	epithelium	hotspots	Hotspots
98	1e-10	1	1	2.23666e-17	6012.53	-11784.6	11784.6	0	6104	0	42264	97	HRCE-DS10666.twopass.merge150.wgt10.zgt2.wig	HRCEpiC	epithelium	hotspots	Hotspots
98	1e-12	1	1	2.23666e-17	6012.53	-11784.6	11784.6	0	6104	0	42264	97	HRCE-DS10666.twopass.merge150.wgt10.zgt2.wig	HRCEpiC	epithelium	hotspots	Hotspots
98	1e-14	1	1	2.23666e-17	6012.53	-11784.6	11784.6	0	6104	0	42264	97	HRCE-DS10666.twopass.merge150.wgt10.zgt2.wig	HRCEpiC	epithelium	hotspots	Hotspots
98	1e-16	1	1	2.23666e-17	6012.53	-11784.6	11784.6	0	6104	0	42264	97	HRCE-DS10666.twopass.merge150.wgt10.zgt2.wig	HRCEpiC	epithelium	hotspots	Hotspots
98	1e-18	1	1	2.23666e-17	6012.53	-11784.6	11784.6	0	6104	0	42264	97	HRCE-DS10666.twopass.merge150.wgt10.zgt2.wig	HRCEpiC	epithelium	hotspots	Hotspots
98	1e-20	1	1	2.23666e-17	6012.53	-11784.6	11784.6	0	6104	0	42264	97	HRCE-DS10666.twopass.merge150.wgt10.zgt2.wig	HRCEpiC	epithelium	hotspots	Hotspots
99	0.01	1.31302	0.0215397	0.272333	0.118489	0.0400952	0.504571	138	6393	750	42264	98	HRE-DS10641.twopass.merge150.wgt10.zgt2.wig	HRE	epithelium	hotspots	Hotspots
99	0.0001	1.3098	0.598447	0.269874	0.51245	-0.734528	1.27428	8	6393	36	42264	98	HRE-DS10641.twopass.merge150.wgt10.zgt2.wig	HRE	epithelium	hotspots	Hotspots
99	1e-06	6.59909e-07	0.996401	-14.2312	3155.08	-6198.19	6169.73	0	6393	3	42264	98	HRE-DS10641.twopass.merge150.wgt10.zgt2.wig	HRE	epithelium	hotspots	Hotspots
99	1e-08	1.29452e-06	0.996413	-13.5574	3015.62	-5924.18	5897.06	0	6393	2	42264	98	HRE-DS10641.twopass.merge150.wgt10.zgt2.wig	HRE	epithelium	hotspots	Hotspots
99	1e-10	1	1	-6.59583e-18	5990.29	-11741	11741	0	6393	0	42264	98	HRE-DS10641.twopass.merge150.wgt10.zgt2.wig	HRE	epithelium	hotspots	Hotspots
99	1e-12	1	1	-6.59583e-18	5990.29	-11741	11741	0	6393	0	42264	98	HRE-DS10641.twopass.merge150.wgt10.zgt2.wig	HRE	epithelium	hotspots	Hotspots
99	1e-14	1	1	-6.59583e-18	5990.29	-11741	11741	0	6393	0	42264	98	HRE-DS10641.twopass.merge150.wgt10.zgt2.wig	HRE	epithelium	hotspots	Hotspots
99	1e-16	1	1	-6.59583e-18	5990.29	-11741	11741	0	6393	0	42264	98	HRE-DS10641.twopass.merge150.wgt10.zgt2.wig	HRE	epithelium	hotspots	Hotspots
99	1e-18	1	1	-6.59583e-18	5990.29	-11741	11741	0	6393	0	42264	98	HRE-DS10641.twopass.merge150.wgt10.zgt2.wig	HRE	epithelium	hotspots	Hotspots
99	1e-20	1	1	-6.59583e-18	5990.29	-11741	11741	0	6393	0	42264	98	HRE-DS10641.twopass.merge150.wgt10.zgt2.wig	HRE	epithelium	hotspots	Hotspots
100	0.01	1.10764	0.396004	0.102227	0.120441	-0.133836	0.338291	125	6258	750	42264	99	HRGEC-DS13716.twopass.merge150.wgt10.zgt2.wig	HRGEC	kidney	hotspots	Hotspots
100	0.0001	1.66796	0.294087	0.5116	0.487611	-0.444117	1.46732	9	6258	36	42264	99	HRGEC-DS13716.twopass.merge150.wgt10.zgt2.wig	HRGEC	kidney	hotspots	Hotspots
100	1e-06	5.92732e-07	0.996383	-14.3385	3162.56	-6212.96	6184.29	0	6258	3	42264	99	HRGEC-DS13716.twopass.merge150.wgt10.zgt2.wig	HRGEC	kidney	hotspots	Hotspots
100	1e-08	1.40819e-06	0.996432	-13.4732	3013.02	-5919	5892.05	0	6258	2	42264	99	HRGEC-DS13716.twopass.merge150.wgt10.zgt2.wig	HRGEC	kidney	hotspots	Hotspots
100	1e-10	1	1	2.76072e-17	5894.88	-11554	11554	0	6258	0	42264	99	HRGEC-DS13716.twopass.merge150.wgt10.zgt2.wig	HRGEC	kidney	hotspots	Hotspots
100	1e-12	1	1	2.76072e-17	5894.88	-11554	11554	0	6258	0	42264	99	HRGEC-DS13716.twopass.merge150.wgt10.zgt2.wig	HRGEC	kidney	hotspots	Hotspots
100	1e-14	1	1	2.76072e-17	5894.88	-11554	11554	0	6258	0	42264	99	HRGEC-DS13716.twopass.merge150.wgt10.zgt2.wig	HRGEC	kidney	hotspots	Hotspots
100	1e-16	1	1	2.76072e-17	5894.88	-11554	11554	0	6258	0	42264	99	HRGEC-DS13716.twopass.merge150.wgt10.zgt2.wig	HRGEC	kidney	hotspots	Hotspots
100	1e-18	1	1	2.76072e-17	5894.88	-11554	11554	0	6258	0	42264	99	HRGEC-DS13716.twopass.merge150.wgt10.zgt2.wig	HRGEC	kidney	hotspots	Hotspots
100	1e-20	1	1	2.76072e-17	5894.88	-11554	11554	0	6258	0	42264	99	HRGEC-DS13716.twopass.merge150.wgt10.zgt2.wig	HRGEC	kidney	hotspots	Hotspots
101	0.01	0.95786	0.724811	-0.0430535	0.122298	-0.282758	0.196651	130	7179	750	42264	100	HRPEpiC-DS12583.twopass.merge150.wgt10.zgt2.wig	HRPEpiC	epithelium	hotspots	Hotspots
101	0.0001	0.836966	0.737591	-0.177972	0.531186	-1.2191	0.863153	8	7179	36	42264	100	HRPEpiC-DS12583.twopass.merge150.wgt10.zgt2.wig	HRPEpiC	epithelium	hotspots	Hotspots
101	1e-06	5.97629e-07	0.996185	-14.3303	2996.7	-5887.85	5859.19	0	7179	3	42264	100	HRPEpiC-DS12583.twopass.merge150.wgt10.zgt2.wig	HRPEpiC	epithelium	hotspots	Hotspots
101	1e-08	1.01711e-06	0.996169	-13.7985	2873.8	-5646.45	5618.86	0	7179	2	42264	100	HRPEpiC-DS12583.twopass.merge150.wgt10.zgt2.wig	HRPEpiC	epithelium	hotspots	Hotspots
101	1e-10	1	1	1.16372e-18	5804.9	-11377.6	11377.6	0	7179	0	42264	100	HRPEpiC-DS12583.twopass.merge150.wgt10.zgt2.wig	HRPEpiC	epithelium	hotspots	Hotspots
101	1e-12	1	1	1.16372e-18	5804.9	-11377.6	11377.6	0	7179	0	42264	100	HRPEpiC-DS12583.twopass.merge150.wgt10.zgt2.wig	HRPEpiC	epithelium	hotspots	Hotspots
101	1e-14	1	1	1.16372e-18	5804.9	-11377.6	11377.6	0	7179	0	42264	100	HRPEpiC-DS12583.twopass.merge150.wgt10.zgt2.wig	HRPEpiC	epithelium	hotspots	Hotspots
101	1e-16	1	1	1.16372e-18	5804.9	-11377.6	11377.6	0	7179	0	42264	100	HRPEpiC-DS12583.twopass.merge150.wgt10.zgt2.wig	HRPEpiC	epithelium	hotspots	Hotspots
101	1e-18	1	1	1.16372e-18	5804.9	-11377.6	11377.6	0	7179	0	42264	100	HRPEpiC-DS12583.twopass.merge150.wgt10.zgt2.wig	HRPEpiC	epithelium	hotspots	Hotspots
101	1e-20	1	1	1.16372e-18	5804.9	-11377.6	11377.6	0	7179	0	42264	100	HRPEpiC-DS12583.twopass.merge150.wgt10.zgt2.wig	HRPEpiC	epithelium	hotspots	Hotspots
102	0.01	1.08616	0.434258	0.0826521	0.105703	-0.124526	0.289831	191	10053	750	42264	101	HSMM-all.twopass.merge150.wgt10.zgt2.wig	HSMM	muscle	hotspots	Hotspots
102	0.0001	1.2519	0.633821	0.224666	0.471636	-0.69974	1.14907	12	10053	36	42264	101	HSMM-all.twopass.merge150.wgt10.zgt2.wig	HSMM	muscle	hotspots	Hotspots
102	1e-06	5.02632e-07	0.995453	-14.5034	2544.92	-5002.55	4973.54	0	10053	3	42264	101	HSMM-all.twopass.merge150.wgt10.zgt2.wig	HSMM	muscle	hotspots	Hotspots
102	1e-08	1.21752e-06	0.995515	-13.6187	2422.91	-4762.53	4735.29	0	10053	2	42264	101	HSMM-all.twopass.merge150.wgt10.zgt2.wig	HSMM	muscle	hotspots	Hotspots
102	1e-10	1	1	-2.81798e-17	5068.32	-9933.9	9933.9	0	10053	0	42264	101	HSMM-all.twopass.merge150.wgt10.zgt2.wig	HSMM	muscle	hotspots	Hotspots
102	1e-12	1	1	-2.81798e-17	5068.32	-9933.9	9933.9	0	10053	0	42264	101	HSMM-all.twopass.merge150.wgt10.zgt2.wig	HSMM	muscle	hotspots	Hotspots
102	1e-14	1	1	-2.81798e-17	5068.32	-9933.9	9933.9	0	10053	0	42264	101	HSMM-all.twopass.merge150.wgt10.zgt2.wig	HSMM	muscle	hotspots	Hotspots
102	1e-16	1	1	-2.81798e-17	5068.32	-9933.9	9933.9	0	10053	0	42264	101	HSMM-all.twopass.merge150.wgt10.zgt2.wig	HSMM	muscle	hotspots	Hotspots
102	1e-18	1	1	-2.81798e-17	5068.32	-9933.9	9933.9	0	10053	0	42264	101	HSMM-all.twopass.merge150.wgt10.zgt2.wig	HSMM	muscle	hotspots	Hotspots
102	1e-20	1	1	-2.81798e-17	5068.32	-9933.9	9933.9	0	10053	0	42264	101	HSMM-all.twopass.merge150.wgt10.zgt2.wig	HSMM	muscle	hotspots	Hotspots
103	0.01	1.11662	0.295974	0.110308	0.105547	-0.096564	0.317179	186	9656	750	42264	102	HSMM_D-all.twopass.merge150.wgt10.zgt2.wig	HSMM	muscle	hotspots	Hotspots
103	0.0001	2.02821	0.118646	0.707151	0.453162	-0.181046	1.59535	14	9656	36	42264	102	HSMM_D-all.twopass.merge150.wgt10.zgt2.wig	HSMM	muscle	hotspots	Hotspots
103	1e-06	5.76773e-07	0.995554	-14.3658	2578.17	-5067.57	5038.84	0	9656	3	42264	102	HSMM_D-all.twopass.merge150.wgt10.zgt2.wig	HSMM	muscle	hotspots	Hotspots
103	1e-08	1.69315e-06	0.99567	-13.2889	2448.86	-4813.05	4786.47	0	9656	2	42264	102	HSMM_D-all.twopass.merge150.wgt10.zgt2.wig	HSMM	muscle	hotspots	Hotspots
103	1e-10	1	1	-2.4248e-17	5087.76	-9972.02	9972.02	0	9656	0	42264	102	HSMM_D-all.twopass.merge150.wgt10.zgt2.wig	HSMM	muscle	hotspots	Hotspots
103	1e-12	1	1	-2.4248e-17	5087.76	-9972.02	9972.02	0	9656	0	42264	102	HSMM_D-all.twopass.merge150.wgt10.zgt2.wig	HSMM	muscle	hotspots	Hotspots
103	1e-14	1	1	-2.4248e-17	5087.76	-9972.02	9972.02	0	9656	0	42264	102	HSMM_D-all.twopass.merge150.wgt10.zgt2.wig	HSMM	muscle	hotspots	Hotspots
103	1e-16	1	1	-2.4248e-17	5087.76	-9972.02	9972.02	0	9656	0	42264	102	HSMM_D-all.twopass.merge150.wgt10.zgt2.wig	HSMM	muscle	hotspots	Hotspots
103	1e-18	1	1	-2.4248e-17	5087.76	-9972.02	9972.02	0	9656	0	42264	102	HSMM_D-all.twopass.merge150.wgt10.zgt2.wig	HSMM	muscle	hotspots	Hotspots
103	1e-20	1	1	-2.4248e-17	5087.76	-9972.02	9972.02	0	9656	0	42264	102	HSMM_D-all.twopass.merge150.wgt10.zgt2.wig	HSMM	muscle	hotspots	Hotspots
104	0.01	1.04643	0.691773	0.0453851	0.114479	-0.178993	0.269764	138	7175	750	42264	103	hTH1-all.twopass.merge150.wgt10.zgt2.wig	Th1	blood	hotspots	Hotspots
104	0.0001	2.02386	0.123774	0.705006	0.458056	-0.192784	1.6028	11	7175	36	42264	103	hTH1-all.twopass.merge150.wgt10.zgt2.wig	Th1	blood	hotspots	Hotspots
104	1e-06	7.17989e-07	0.996163	-14.1468	2941.87	-5780.22	5751.93	0	7175	3	42264	103	hTH1-all.twopass.merge150.wgt10.zgt2.wig	Th1	blood	hotspots	Hotspots
104	1e-08	2.49282e-06	0.996306	-12.9021	2786.81	-5475.05	5449.24	0	7175	2	42264	103	hTH1-all.twopass.merge150.wgt10.zgt2.wig	Th1	blood	hotspots	Hotspots
104	1e-10	1	1	-9.89534e-18	5506.73	-10793.2	10793.2	0	7175	0	42264	103	hTH1-all.twopass.merge150.wgt10.zgt2.wig	Th1	blood	hotspots	Hotspots
104	1e-12	1	1	-9.89534e-18	5506.73	-10793.2	10793.2	0	7175	0	42264	103	hTH1-all.twopass.merge150.wgt10.zgt2.wig	Th1	blood	hotspots	Hotspots
104	1e-14	1	1	-9.89534e-18	5506.73	-10793.2	10793.2	0	7175	0	42264	103	hTH1-all.twopass.merge150.wgt10.zgt2.wig	Th1	blood	hotspots	Hotspots
104	1e-16	1	1	-9.89534e-18	5506.73	-10793.2	10793.2	0	7175	0	42264	103	hTH1-all.twopass.merge150.wgt10.zgt2.wig	Th1	blood	hotspots	Hotspots
104	1e-18	1	1	-9.89534e-18	5506.73	-10793.2	10793.2	0	7175	0	42264	103	hTH1-all.twopass.merge150.wgt10.zgt2.wig	Th1	blood	hotspots	Hotspots
104	1e-20	1	1	-9.89534e-18	5506.73	-10793.2	10793.2	0	7175	0	42264	103	hTH1-all.twopass.merge150.wgt10.zgt2.wig	Th1	blood	hotspots	Hotspots
105	0.01	1.17879	0.205508	0.164486	0.129925	-0.0901657	0.419138	95	4432	750	42264	104	hTH2-DS7842.twopass.merge150.wgt10.zgt2.wig	Th2	blood	hotspots	Hotspots
105	0.0001	3.0944	0.0161148	1.1296	0.469431	0.20951	2.04968	10	4432	36	42264	104	hTH2-DS7842.twopass.merge150.wgt10.zgt2.wig	Th2	blood	hotspots	Hotspots
105	1e-06	7.8501e-07	0.996919	-14.0576	3640.05	-7148.55	7120.44	0	4432	3	42264	104	hTH2-DS7842.twopass.merge150.wgt10.zgt2.wig	Th2	blood	hotspots	Hotspots
105	1e-08	1.60699e-06	0.996933	-13.3411	3470.93	-6816.36	6789.68	0	4432	2	42264	104	hTH2-DS7842.twopass.merge150.wgt10.zgt2.wig	Th2	blood	hotspots	Hotspots
105	1e-10	1	1	2.43604e-17	6500.65	-12741.3	12741.3	0	4432	0	42264	104	hTH2-DS7842.twopass.merge150.wgt10.zgt2.wig	Th2	blood	hotspots	Hotspots
105	1e-12	1	1	2.43604e-17	6500.65	-12741.3	12741.3	0	4432	0	42264	104	hTH2-DS7842.twopass.merge150.wgt10.zgt2.wig	Th2	blood	hotspots	Hotspots
105	1e-14	1	1	2.43604e-17	6500.65	-12741.3	12741.3	0	4432	0	42264	104	hTH2-DS7842.twopass.merge150.wgt10.zgt2.wig	Th2	blood	hotspots	Hotspots
105	1e-16	1	1	2.43604e-17	6500.65	-12741.3	12741.3	0	4432	0	42264	104	hTH2-DS7842.twopass.merge150.wgt10.zgt2.wig	Th2	blood	hotspots	Hotspots
105	1e-18	1	1	2.43604e-17	6500.65	-12741.3	12741.3	0	4432	0	42264	104	hTH2-DS7842.twopass.merge150.wgt10.zgt2.wig	Th2	blood	hotspots	Hotspots
105	1e-20	1	1	2.43604e-17	6500.65	-12741.3	12741.3	0	4432	0	42264	104	hTH2-DS7842.twopass.merge150.wgt10.zgt2.wig	Th2	blood	hotspots	Hotspots
106	0.01	1.06627	0.55755	0.06417	0.109415	-0.150283	0.278623	167	8861	750	42264	105	HUVEC-all.twopass.merge150.wgt10.zgt2.wig	HUVEC	blood_vessel	hotspots	Hotspots
106	0.0001	1.52628	0.367529	0.422832	0.469234	-0.496867	1.34253	11	8861	36	42264	105	HUVEC-all.twopass.merge150.wgt10.zgt2.wig	HUVEC	blood_vessel	hotspots	Hotspots
106	1e-06	6.15522e-07	0.995745	-14.3008	2681.74	-5270.52	5241.92	0	8861	3	42264	105	HUVEC-all.twopass.merge150.wgt10.zgt2.wig	HUVEC	blood_vessel	hotspots	Hotspots
106	1e-08	1.9763e-06	0.99588	-13.1343	2543.36	-4998.11	4971.84	0	8861	2	42264	105	HUVEC-all.twopass.merge150.wgt10.zgt2.wig	HUVEC	blood_vessel	hotspots	Hotspots
106	1e-10	1	1	-1.50284e-17	5252.34	-10294.6	10294.6	0	8861	0	42264	105	HUVEC-all.twopass.merge150.wgt10.zgt2.wig	HUVEC	blood_vessel	hotspots	Hotspots
106	1e-12	1	1	-1.50284e-17	5252.34	-10294.6	10294.6	0	8861	0	42264	105	HUVEC-all.twopass.merge150.wgt10.zgt2.wig	HUVEC	blood_vessel	hotspots	Hotspots
106	1e-14	1	1	-1.50284e-17	5252.34	-10294.6	10294.6	0	8861	0	42264	105	HUVEC-all.twopass.merge150.wgt10.zgt2.wig	HUVEC	blood_vessel	hotspots	Hotspots
106	1e-16	1	1	-1.50284e-17	5252.34	-10294.6	10294.6	0	8861	0	42264	105	HUVEC-all.twopass.merge150.wgt10.zgt2.wig	HUVEC	blood_vessel	hotspots	Hotspots
106	1e-18	1	1	-1.50284e-17	5252.34	-10294.6	10294.6	0	8861	0	42264	105	HUVEC-all.twopass.merge150.wgt10.zgt2.wig	HUVEC	blood_vessel	hotspots	Hotspots
106	1e-20	1	1	-1.50284e-17	5252.34	-10294.6	10294.6	0	8861	0	42264	105	HUVEC-all.twopass.merge150.wgt10.zgt2.wig	HUVEC	blood_vessel	hotspots	Hotspots
107	0.01	1.21185	0.1068	0.19215	0.119144	-0.0413733	0.425672	118	6035	750	42264	106	HVMF-DS13981.twopass.merge150.wgt10.zgt2.wig	HVMF	connective	hotspots	Hotspots
107	0.0001	2.1964	0.097374	0.78682	0.47464	-0.143474	1.71711	11	6035	36	42264	106	HVMF-DS13981.twopass.merge150.wgt10.zgt2.wig	HVMF	connective	hotspots	Hotspots
107	1e-06	4.87912e-07	0.996416	-14.5331	3235.66	-6356.42	6327.36	1	6035	3	42264	106	HVMF-DS13981.twopass.merge150.wgt10.zgt2.wig	HVMF	connective	hotspots	Hotspots
107	1e-08	9.97743e-07	0.996426	-13.8178	3085.05	-6060.51	6032.88	1	6035	2	42264	106	HVMF-DS13981.twopass.merge150.wgt10.zgt2.wig	HVMF	connective	hotspots	Hotspots
107	1e-10	1	1	1.03392e-17	5944.9	-11652	11652	0	6035	0	42264	106	HVMF-DS13981.twopass.merge150.wgt10.zgt2.wig	HVMF	connective	hotspots	Hotspots
107	1e-12	1	1	1.03392e-17	5944.9	-11652	11652	0	6035	0	42264	106	HVMF-DS13981.twopass.merge150.wgt10.zgt2.wig	HVMF	connective	hotspots	Hotspots
107	1e-14	1	1	1.03392e-17	5944.9	-11652	11652	0	6035	0	42264	106	HVMF-DS13981.twopass.merge150.wgt10.zgt2.wig	HVMF	connective	hotspots	Hotspots
107	1e-16	1	1	1.03392e-17	5944.9	-11652	11652	0	6035	0	42264	106	HVMF-DS13981.twopass.merge150.wgt10.zgt2.wig	HVMF	connective	hotspots	Hotspots
107	1e-18	1	1	1.03392e-17	5944.9	-11652	11652	0	6035	0	42264	106	HVMF-DS13981.twopass.merge150.wgt10.zgt2.wig	HVMF	connective	hotspots	Hotspots
107	1e-20	1	1	1.03392e-17	5944.9	-11652	11652	0	6035	0	42264	106	HVMF-DS13981.twopass.merge150.wgt10.zgt2.wig	HVMF	connective	hotspots	Hotspots
108	0.01	1.2123	0.110563	0.192521	0.120652	-0.0439575	0.429	122	5982	750	42264	107	Ishikawa_E_AllReps.30000000.twopass.merge150.wgt10.zgt2.wig	Ishikawa	uterus	hotspots	Hotspots
108	0.0001	1.09512	0.860493	0.0908612	0.517001	-0.922461	1.10418	7	5982	36	42264	107	Ishikawa_E_AllReps.30000000.twopass.merge150.wgt10.zgt2.wig	Ishikawa	uterus	hotspots	Hotspots
108	1e-06	7.52414e-07	0.996515	-14.1	3227.75	-6340.49	6312.29	0	5982	3	42264	107	Ishikawa_E_AllReps.30000000.twopass.merge150.wgt10.zgt2.wig	Ishikawa	uterus	hotspots	Hotspots
108	1e-08	1.6218e-06	0.99655	-13.332	3082.94	-6055.9	6029.23	0	5982	2	42264	107	Ishikawa_E_AllReps.30000000.twopass.merge150.wgt10.zgt2.wig	Ishikawa	uterus	hotspots	Hotspots
108	1e-10	1	1	-9.44625e-18	6027.68	-11814.2	11814.2	0	5982	0	42264	107	Ishikawa_E_AllReps.30000000.twopass.merge150.wgt10.zgt2.wig	Ishikawa	uterus	hotspots	Hotspots
108	1e-12	1	1	-9.44625e-18	6027.68	-11814.2	11814.2	0	5982	0	42264	107	Ishikawa_E_AllReps.30000000.twopass.merge150.wgt10.zgt2.wig	Ishikawa	uterus	hotspots	Hotspots
108	1e-14	1	1	-9.44625e-18	6027.68	-11814.2	11814.2	0	5982	0	42264	107	Ishikawa_E_AllReps.30000000.twopass.merge150.wgt10.zgt2.wig	Ishikawa	uterus	hotspots	Hotspots
108	1e-16	1	1	-9.44625e-18	6027.68	-11814.2	11814.2	0	5982	0	42264	107	Ishikawa_E_AllReps.30000000.twopass.merge150.wgt10.zgt2.wig	Ishikawa	uterus	hotspots	Hotspots
108	1e-18	1	1	-9.44625e-18	6027.68	-11814.2	11814.2	0	5982	0	42264	107	Ishikawa_E_AllReps.30000000.twopass.merge150.wgt10.zgt2.wig	Ishikawa	uterus	hotspots	Hotspots
108	1e-20	1	1	-9.44625e-18	6027.68	-11814.2	11814.2	0	5982	0	42264	107	Ishikawa_E_AllReps.30000000.twopass.merge150.wgt10.zgt2.wig	Ishikawa	uterus	hotspots	Hotspots
109	0.01	1.37944	0.0062715	0.321679	0.117692	0.0910036	0.552355	133	6060	750	42264	108	Ishikawa_T_AllReps.30000000.twopass.merge150.wgt10.zgt2.wig	Ishikawa	uterus	hotspots	Hotspots
109	0.0001	1.05115	0.923745	0.0498801	0.521116	-0.971507	1.07127	7	6060	36	42264	108	Ishikawa_T_AllReps.30000000.twopass.merge150.wgt10.zgt2.wig	Ishikawa	uterus	hotspots	Hotspots
109	1e-06	9.38778e-07	0.99652	-13.8787	3181.86	-6250.32	6222.57	0	6060	3	42264	108	Ishikawa_T_AllReps.30000000.twopass.merge150.wgt10.zgt2.wig	Ishikawa	uterus	hotspots	Hotspots
109	1e-08	2.09951e-06	0.996565	-13.0738	3036.64	-5964.89	5938.74	0	6060	2	42264	108	Ishikawa_T_AllReps.30000000.twopass.merge150.wgt10.zgt2.wig	Ishikawa	uterus	hotspots	Hotspots
109	1e-10	1	1	-1.14553e-18	6011.7	-11782.9	11782.9	0	6060	0	42264	108	Ishikawa_T_AllReps.30000000.twopass.merge150.wgt10.zgt2.wig	Ishikawa	uterus	hotspots	Hotspots
109	1e-12	1	1	-1.14553e-18	6011.7	-11782.9	11782.9	0	6060	0	42264	108	Ishikawa_T_AllReps.30000000.twopass.merge150.wgt10.zgt2.wig	Ishikawa	uterus	hotspots	Hotspots
109	1e-14	1	1	-1.14553e-18	6011.7	-11782.9	11782.9	0	6060	0	42264	108	Ishikawa_T_AllReps.30000000.twopass.merge150.wgt10.zgt2.wig	Ishikawa	uterus	hotspots	Hotspots
109	1e-16	1	1	-1.14553e-18	6011.7	-11782.9	11782.9	0	6060	0	42264	108	Ishikawa_T_AllReps.30000000.twopass.merge150.wgt10.zgt2.wig	Ishikawa	uterus	hotspots	Hotspots
109	1e-18	1	1	-1.14553e-18	6011.7	-11782.9	11782.9	0	6060	0	42264	108	Ishikawa_T_AllReps.30000000.twopass.merge150.wgt10.zgt2.wig	Ishikawa	uterus	hotspots	Hotspots
109	1e-20	1	1	-1.14553e-18	6011.7	-11782.9	11782.9	0	6060	0	42264	108	Ishikawa_T_AllReps.30000000.twopass.merge150.wgt10.zgt2.wig	Ishikawa	uterus	hotspots	Hotspots
110	0.01	1.02294	0.851262	0.0226767	0.120938	-0.214361	0.259714	126	6307	750	42264	109	Jurkat-DS12659.twopass.merge150.wgt10.zgt2.wig	Jurkat	blood	hotspots	Hotspots
110	0.0001	2.04935	0.129205	0.717525	0.472913	-0.209384	1.64443	10	6307	36	42264	109	Jurkat-DS12659.twopass.merge150.wgt10.zgt2.wig	Jurkat	blood	hotspots	Hotspots
110	1e-06	5.46993e-07	0.996342	-14.4188	3145.44	-6179.48	6150.64	0	6307	3	42264	109	Jurkat-DS12659.twopass.merge150.wgt10.zgt2.wig	Jurkat	blood	hotspots	Hotspots
110	1e-08	1.31624e-06	0.996387	-13.5407	2990.64	-5875.2	5848.12	0	6307	2	42264	109	Jurkat-DS12659.twopass.merge150.wgt10.zgt2.wig	Jurkat	blood	hotspots	Hotspots
110	1e-10	1	1	2.49467e-17	5816.95	-11401.2	11401.2	0	6307	0	42264	109	Jurkat-DS12659.twopass.merge150.wgt10.zgt2.wig	Jurkat	blood	hotspots	Hotspots
110	1e-12	1	1	2.49467e-17	5816.95	-11401.2	11401.2	0	6307	0	42264	109	Jurkat-DS12659.twopass.merge150.wgt10.zgt2.wig	Jurkat	blood	hotspots	Hotspots
110	1e-14	1	1	2.49467e-17	5816.95	-11401.2	11401.2	0	6307	0	42264	109	Jurkat-DS12659.twopass.merge150.wgt10.zgt2.wig	Jurkat	blood	hotspots	Hotspots
110	1e-16	1	1	2.49467e-17	5816.95	-11401.2	11401.2	0	6307	0	42264	109	Jurkat-DS12659.twopass.merge150.wgt10.zgt2.wig	Jurkat	blood	hotspots	Hotspots
110	1e-18	1	1	2.49467e-17	5816.95	-11401.2	11401.2	0	6307	0	42264	109	Jurkat-DS12659.twopass.merge150.wgt10.zgt2.wig	Jurkat	blood	hotspots	Hotspots
110	1e-20	1	1	2.49467e-17	5816.95	-11401.2	11401.2	0	6307	0	42264	109	Jurkat-DS12659.twopass.merge150.wgt10.zgt2.wig	Jurkat	blood	hotspots	Hotspots
111	0.01	1.04418	0.691508	0.0432313	0.108947	-0.170305	0.256768	168	8704	750	42264	110	K562-all.twopass.merge150.wgt10.zgt2.wig	K562	blood	hotspots	Hotspots
111	0.0001	0.971421	0.951736	-0.0289958	0.479055	-0.967943	0.909952	9	8704	36	42264	110	K562-all.twopass.merge150.wgt10.zgt2.wig	K562	blood	hotspots	Hotspots
111	1e-06	5.68741e-07	0.995732	-14.3798	2688.33	-5283.5	5254.74	0	8704	3	42264	110	K562-all.twopass.merge150.wgt10.zgt2.wig	K562	blood	hotspots	Hotspots
111	1e-08	1.45089e-06	0.995807	-13.4433	2558.32	-5027.74	5000.86	0	8704	2	42264	110	K562-all.twopass.merge150.wgt10.zgt2.wig	K562	blood	hotspots	Hotspots
111	1e-10	1	1	-2.7612e-17	5211.72	-10215	10215	0	8704	0	42264	110	K562-all.twopass.merge150.wgt10.zgt2.wig	K562	blood	hotspots	Hotspots
111	1e-12	1	1	-2.7612e-17	5211.72	-10215	10215	0	8704	0	42264	110	K562-all.twopass.merge150.wgt10.zgt2.wig	K562	blood	hotspots	Hotspots
111	1e-14	1	1	-2.7612e-17	5211.72	-10215	10215	0	8704	0	42264	110	K562-all.twopass.merge150.wgt10.zgt2.wig	K562	blood	hotspots	Hotspots
111	1e-16	1	1	-2.7612e-17	5211.72	-10215	10215	0	8704	0	42264	110	K562-all.twopass.merge150.wgt10.zgt2.wig	K562	blood	hotspots	Hotspots
111	1e-18	1	1	-2.7612e-17	5211.72	-10215	10215	0	8704	0	42264	110	K562-all.twopass.merge150.wgt10.zgt2.wig	K562	blood	hotspots	Hotspots
111	1e-20	1	1	-2.7612e-17	5211.72	-10215	10215	0	8704	0	42264	110	K562-all.twopass.merge150.wgt10.zgt2.wig	K562	blood	hotspots	Hotspots
112	0.01	1.04259	0.706157	0.04171	0.11063	-0.175125	0.258545	176	9485	750	42264	111	LNCap-all.twopass.merge150.wgt10.zgt2.wig	LNCaP	prostate	hotspots	Hotspots
112	0.0001	1.09849	0.84907	0.0939384	0.493621	-0.873558	1.06144	10	9485	36	42264	111	LNCap-all.twopass.merge150.wgt10.zgt2.wig	LNCaP	prostate	hotspots	Hotspots
112	1e-06	5.92546e-07	0.995631	-14.3388	2618.33	-5146.26	5117.58	0	9485	3	42264	111	LNCap-all.twopass.merge150.wgt10.zgt2.wig	LNCaP	prostate	hotspots	Hotspots
112	1e-08	1.64037e-06	0.995728	-13.3206	2487.94	-4889.68	4863.03	0	9485	2	42264	111	LNCap-all.twopass.merge150.wgt10.zgt2.wig	LNCaP	prostate	hotspots	Hotspots
112	1e-10	1	1	1.14669e-17	5281.16	-10351.1	10351.1	0	9485	0	42264	111	LNCap-all.twopass.merge150.wgt10.zgt2.wig	LNCaP	prostate	hotspots	Hotspots
112	1e-12	1	1	1.14669e-17	5281.16	-10351.1	10351.1	0	9485	0	42264	111	LNCap-all.twopass.merge150.wgt10.zgt2.wig	LNCaP	prostate	hotspots	Hotspots
112	1e-14	1	1	1.14669e-17	5281.16	-10351.1	10351.1	0	9485	0	42264	111	LNCap-all.twopass.merge150.wgt10.zgt2.wig	LNCaP	prostate	hotspots	Hotspots
112	1e-16	1	1	1.14669e-17	5281.16	-10351.1	10351.1	0	9485	0	42264	111	LNCap-all.twopass.merge150.wgt10.zgt2.wig	LNCaP	prostate	hotspots	Hotspots
112	1e-18	1	1	1.14669e-17	5281.16	-10351.1	10351.1	0	9485	0	42264	111	LNCap-all.twopass.merge150.wgt10.zgt2.wig	LNCaP	prostate	hotspots	Hotspots
112	1e-20	1	1	1.14669e-17	5281.16	-10351.1	10351.1	0	9485	0	42264	111	LNCap-all.twopass.merge150.wgt10.zgt2.wig	LNCaP	prostate	hotspots	Hotspots
113	0.01	1.08413	0.465248	0.0807732	0.110613	-0.136028	0.297575	167	8747	750	42264	112	MCF7-all.twopass.merge150.wgt10.zgt2.wig	MCF-7	breast	hotspots	Hotspots
113	0.0001	1.25262	0.640952	0.225241	0.482969	-0.721378	1.17186	10	8747	36	42264	112	MCF7-all.twopass.merge150.wgt10.zgt2.wig	MCF-7	breast	hotspots	Hotspots
113	1e-06	6.49836e-07	0.995816	-14.2465	2716.71	-5339.01	5310.51	0	8747	3	42264	112	MCF7-all.twopass.merge150.wgt10.zgt2.wig	MCF-7	breast	hotspots	Hotspots
113	1e-08	1.7615e-06	0.995911	-13.2493	2585.17	-5080.19	5053.69	0	8747	2	42264	112	MCF7-all.twopass.merge150.wgt10.zgt2.wig	MCF-7	breast	hotspots	Hotspots
113	1e-10	1	1	-6.51317e-18	5330.64	-10448.1	10448.1	0	8747	0	42264	112	MCF7-all.twopass.merge150.wgt10.zgt2.wig	MCF-7	breast	hotspots	Hotspots
113	1e-12	1	1	-6.51317e-18	5330.64	-10448.1	10448.1	0	8747	0	42264	112	MCF7-all.twopass.merge150.wgt10.zgt2.wig	MCF-7	breast	hotspots	Hotspots
113	1e-14	1	1	-6.51317e-18	5330.64	-10448.1	10448.1	0	8747	0	42264	112	MCF7-all.twopass.merge150.wgt10.zgt2.wig	MCF-7	breast	hotspots	Hotspots
113	1e-16	1	1	-6.51317e-18	5330.64	-10448.1	10448.1	0	8747	0	42264	112	MCF7-all.twopass.merge150.wgt10.zgt2.wig	MCF-7	breast	hotspots	Hotspots
113	1e-18	1	1	-6.51317e-18	5330.64	-10448.1	10448.1	0	8747	0	42264	112	MCF7-all.twopass.merge150.wgt10.zgt2.wig	MCF-7	breast	hotspots	Hotspots
113	1e-20	1	1	-6.51317e-18	5330.64	-10448.1	10448.1	0	8747	0	42264	112	MCF7-all.twopass.merge150.wgt10.zgt2.wig	MCF-7	breast	hotspots	Hotspots
114	0.01	1.22382	0.0960739	0.201978	0.121367	-0.0359012	0.439857	121	5506	750	42264	113	NB4-DS12543.twopass.merge150.wgt10.zgt2.wig	NB4	blood	hotspots	Hotspots
114	0.0001	1.92026	0.174606	0.652462	0.480616	-0.289547	1.59447	9	5506	36	42264	113	NB4-DS12543.twopass.merge150.wgt10.zgt2.wig	NB4	blood	hotspots	Hotspots
114	1e-06	6.18597e-07	0.996581	-14.2958	3335.97	-6552.79	6524.2	0	5506	3	42264	113	NB4-DS12543.twopass.merge150.wgt10.zgt2.wig	NB4	blood	hotspots	Hotspots
114	1e-08	1.07229e-06	0.996561	-13.7457	3189.05	-6264.28	6236.79	0	5506	2	42264	113	NB4-DS12543.twopass.merge150.wgt10.zgt2.wig	NB4	blood	hotspots	Hotspots
114	1e-10	1	1	1.67475e-17	6081.62	-11920	11920	0	5506	0	42264	113	NB4-DS12543.twopass.merge150.wgt10.zgt2.wig	NB4	blood	hotspots	Hotspots
114	1e-12	1	1	1.67475e-17	6081.62	-11920	11920	0	5506	0	42264	113	NB4-DS12543.twopass.merge150.wgt10.zgt2.wig	NB4	blood	hotspots	Hotspots
114	1e-14	1	1	1.67475e-17	6081.62	-11920	11920	0	5506	0	42264	113	NB4-DS12543.twopass.merge150.wgt10.zgt2.wig	NB4	blood	hotspots	Hotspots
114	1e-16	1	1	1.67475e-17	6081.62	-11920	11920	0	5506	0	42264	113	NB4-DS12543.twopass.merge150.wgt10.zgt2.wig	NB4	blood	hotspots	Hotspots
114	1e-18	1	1	1.67475e-17	6081.62	-11920	11920	0	5506	0	42264	113	NB4-DS12543.twopass.merge150.wgt10.zgt2.wig	NB4	blood	hotspots	Hotspots
114	1e-20	1	1	1.67475e-17	6081.62	-11920	11920	0	5506	0	42264	113	NB4-DS12543.twopass.merge150.wgt10.zgt2.wig	NB4	blood	hotspots	Hotspots
115	0.01	1.11297	0.369112	0.107029	0.119167	-0.126539	0.340597	128	6651	750	42264	114	NHA-DS12800.twopass.merge150.wgt10.zgt2.wig	NH-A	nervous	hotspots	Hotspots
115	0.0001	1.62189	0.326529	0.483593	0.492894	-0.48248	1.44967	9	6651	36	42264	114	NHA-DS12800.twopass.merge150.wgt10.zgt2.wig	NH-A	nervous	hotspots	Hotspots
115	1e-06	6.70394e-07	0.996322	-14.2154	3084.02	-6058.9	6030.47	0	6651	3	42264	114	NHA-DS12800.twopass.merge150.wgt10.zgt2.wig	NH-A	nervous	hotspots	Hotspots
115	1e-08	1.35611e-06	0.996341	-13.5109	2946.35	-5788.35	5761.33	0	6651	2	42264	114	NHA-DS12800.twopass.merge150.wgt10.zgt2.wig	NH-A	nervous	hotspots	Hotspots
115	1e-10	1	1	-2.72052e-17	5828.61	-11424.1	11424.1	0	6651	0	42264	114	NHA-DS12800.twopass.merge150.wgt10.zgt2.wig	NH-A	nervous	hotspots	Hotspots
115	1e-12	1	1	-2.72052e-17	5828.61	-11424.1	11424.1	0	6651	0	42264	114	NHA-DS12800.twopass.merge150.wgt10.zgt2.wig	NH-A	nervous	hotspots	Hotspots
115	1e-14	1	1	-2.72052e-17	5828.61	-11424.1	11424.1	0	6651	0	42264	114	NHA-DS12800.twopass.merge150.wgt10.zgt2.wig	NH-A	nervous	hotspots	Hotspots
115	1e-16	1	1	-2.72052e-17	5828.61	-11424.1	11424.1	0	6651	0	42264	114	NHA-DS12800.twopass.merge150.wgt10.zgt2.wig	NH-A	nervous	hotspots	Hotspots
115	1e-18	1	1	-2.72052e-17	5828.61	-11424.1	11424.1	0	6651	0	42264	114	NHA-DS12800.twopass.merge150.wgt10.zgt2.wig	NH-A	nervous	hotspots	Hotspots
115	1e-20	1	1	-2.72052e-17	5828.61	-11424.1	11424.1	0	6651	0	42264	114	NHA-DS12800.twopass.merge150.wgt10.zgt2.wig	NH-A	nervous	hotspots	Hotspots
116	0.01	1.13085	0.293913	0.122969	0.117161	-0.106666	0.352605	133	6773	750	42264	115	NHDF_Ad-DS12863.twopass.merge150.wgt10.zgt2.wig	NHDF-Ad	skin	hotspots	Hotspots
116	0.0001	1.51366	0.395928	0.414531	0.488307	-0.54255	1.37161	10	6773	36	42264	115	NHDF_Ad-DS12863.twopass.merge150.wgt10.zgt2.wig	NHDF-Ad	skin	hotspots	Hotspots
116	1e-06	4.30698e-07	0.99622	-14.6579	3093.61	-6078.13	6048.81	0	6773	3	42264	115	NHDF_Ad-DS12863.twopass.merge150.wgt10.zgt2.wig	NHDF-Ad	skin	hotspots	Hotspots
116	1e-08	9.66888e-07	0.996251	-13.8492	2947.49	-5790.94	5763.24	0	6773	2	42264	115	NHDF_Ad-DS12863.twopass.merge150.wgt10.zgt2.wig	NHDF-Ad	skin	hotspots	Hotspots
116	1e-10	1	1	-7.68817e-18	5745.26	-11260.7	11260.7	0	6773	0	42264	115	NHDF_Ad-DS12863.twopass.merge150.wgt10.zgt2.wig	NHDF-Ad	skin	hotspots	Hotspots
116	1e-12	1	1	-7.68817e-18	5745.26	-11260.7	11260.7	0	6773	0	42264	115	NHDF_Ad-DS12863.twopass.merge150.wgt10.zgt2.wig	NHDF-Ad	skin	hotspots	Hotspots
116	1e-14	1	1	-7.68817e-18	5745.26	-11260.7	11260.7	0	6773	0	42264	115	NHDF_Ad-DS12863.twopass.merge150.wgt10.zgt2.wig	NHDF-Ad	skin	hotspots	Hotspots
116	1e-16	1	1	-7.68817e-18	5745.26	-11260.7	11260.7	0	6773	0	42264	115	NHDF_Ad-DS12863.twopass.merge150.wgt10.zgt2.wig	NHDF-Ad	skin	hotspots	Hotspots
116	1e-18	1	1	-7.68817e-18	5745.26	-11260.7	11260.7	0	6773	0	42264	115	NHDF_Ad-DS12863.twopass.merge150.wgt10.zgt2.wig	NHDF-Ad	skin	hotspots	Hotspots
116	1e-20	1	1	-7.68817e-18	5745.26	-11260.7	11260.7	0	6773	0	42264	115	NHDF_Ad-DS12863.twopass.merge150.wgt10.zgt2.wig	NHDF-Ad	skin	hotspots	Hotspots
117	0.01	1.23734	0.0729066	0.212967	0.11875	-0.0197819	0.445716	132	6206	750	42264	116	NHDF_Neo-DS11923.twopass.merge150.wgt10.zgt2.wig	NHDF-neo	skin	hotspots	Hotspots
117	0.0001	1.75917	0.248037	0.564844	0.488987	-0.393571	1.52326	10	6206	36	42264	116	NHDF_Neo-DS11923.twopass.merge150.wgt10.zgt2.wig	NHDF-neo	skin	hotspots	Hotspots
117	1e-06	3.82763e-07	0.996357	-14.7758	3235.78	-6356.91	6327.36	0	6206	3	42264	116	NHDF_Neo-DS11923.twopass.merge150.wgt10.zgt2.wig	NHDF-neo	skin	hotspots	Hotspots
117	1e-08	8.34889e-07	0.996379	-13.996	3083.59	-6057.84	6029.85	0	6206	2	42264	116	NHDF_Neo-DS11923.twopass.merge150.wgt10.zgt2.wig	NHDF-neo	skin	hotspots	Hotspots
117	1e-10	1	1	1.01174e-18	5951.27	-11664.5	11664.5	0	6206	0	42264	116	NHDF_Neo-DS11923.twopass.merge150.wgt10.zgt2.wig	NHDF-neo	skin	hotspots	Hotspots
117	1e-12	1	1	1.01174e-18	5951.27	-11664.5	11664.5	0	6206	0	42264	116	NHDF_Neo-DS11923.twopass.merge150.wgt10.zgt2.wig	NHDF-neo	skin	hotspots	Hotspots
117	1e-14	1	1	1.01174e-18	5951.27	-11664.5	11664.5	0	6206	0	42264	116	NHDF_Neo-DS11923.twopass.merge150.wgt10.zgt2.wig	NHDF-neo	skin	hotspots	Hotspots
117	1e-16	1	1	1.01174e-18	5951.27	-11664.5	11664.5	0	6206	0	42264	116	NHDF_Neo-DS11923.twopass.merge150.wgt10.zgt2.wig	NHDF-neo	skin	hotspots	Hotspots
117	1e-18	1	1	1.01174e-18	5951.27	-11664.5	11664.5	0	6206	0	42264	116	NHDF_Neo-DS11923.twopass.merge150.wgt10.zgt2.wig	NHDF-neo	skin	hotspots	Hotspots
117	1e-20	1	1	1.01174e-18	5951.27	-11664.5	11664.5	0	6206	0	42264	116	NHDF_Neo-DS11923.twopass.merge150.wgt10.zgt2.wig	NHDF-neo	skin	hotspots	Hotspots
118	0.01	0.984295	0.886523	-0.0158295	0.110924	-0.233241	0.201582	162	8781	750	42264	117	NHEK-all.twopass.merge150.wgt10.zgt2.wig	NHEK	skin	hotspots	Hotspots
118	0.0001	1.53461	0.360974	0.428275	0.468823	-0.490618	1.34717	11	8781	36	42264	117	NHEK-all.twopass.merge150.wgt10.zgt2.wig	NHEK	skin	hotspots	Hotspots
118	1e-06	7.35196e-07	0.995806	-14.1231	2686.72	-5280.09	5251.85	0	8781	3	42264	117	NHEK-all.twopass.merge150.wgt10.zgt2.wig	NHEK	skin	hotspots	Hotspots
118	1e-08	2.36639e-06	0.99595	-12.9541	2552.23	-5015.33	4989.42	0	8781	2	42264	117	NHEK-all.twopass.merge150.wgt10.zgt2.wig	NHEK	skin	hotspots	Hotspots
118	1e-10	1	1	-1.73258e-17	5255.72	-10301.2	10301.2	0	8781	0	42264	117	NHEK-all.twopass.merge150.wgt10.zgt2.wig	NHEK	skin	hotspots	Hotspots
118	1e-12	1	1	-1.73258e-17	5255.72	-10301.2	10301.2	0	8781	0	42264	117	NHEK-all.twopass.merge150.wgt10.zgt2.wig	NHEK	skin	hotspots	Hotspots
118	1e-14	1	1	-1.73258e-17	5255.72	-10301.2	10301.2	0	8781	0	42264	117	NHEK-all.twopass.merge150.wgt10.zgt2.wig	NHEK	skin	hotspots	Hotspots
118	1e-16	1	1	-1.73258e-17	5255.72	-10301.2	10301.2	0	8781	0	42264	117	NHEK-all.twopass.merge150.wgt10.zgt2.wig	NHEK	skin	hotspots	Hotspots
118	1e-18	1	1	-1.73258e-17	5255.72	-10301.2	10301.2	0	8781	0	42264	117	NHEK-all.twopass.merge150.wgt10.zgt2.wig	NHEK	skin	hotspots	Hotspots
118	1e-20	1	1	-1.73258e-17	5255.72	-10301.2	10301.2	0	8781	0	42264	117	NHEK-all.twopass.merge150.wgt10.zgt2.wig	NHEK	skin	hotspots	Hotspots
119	0.01	1.13654	0.275854	0.127985	0.117452	-0.102221	0.358191	133	6858	750	42264	118	NHLF-DS12829.twopass.merge150.wgt10.zgt2.wig	NHLF	lung	hotspots	Hotspots
119	0.0001	0.912544	0.860204	-0.0915186	0.519655	-1.11004	0.927006	7	6858	36	42264	118	NHLF-DS12829.twopass.merge150.wgt10.zgt2.wig	NHLF	lung	hotspots	Hotspots
119	1e-06	5.17408e-07	0.996219	-14.4744	3054.81	-6001.91	5972.96	0	6858	3	42264	118	NHLF-DS12829.twopass.merge150.wgt10.zgt2.wig	NHLF	lung	hotspots	Hotspots
119	1e-08	9.299e-07	0.996207	-13.8882	2921.82	-5740.65	5712.88	0	6858	2	42264	118	NHLF-DS12829.twopass.merge150.wgt10.zgt2.wig	NHLF	lung	hotspots	Hotspots
119	1e-10	1	1	-2.89423e-17	5759.8	-11289.2	11289.2	0	6858	0	42264	118	NHLF-DS12829.twopass.merge150.wgt10.zgt2.wig	NHLF	lung	hotspots	Hotspots
119	1e-12	1	1	-2.89423e-17	5759.8	-11289.2	11289.2	0	6858	0	42264	118	NHLF-DS12829.twopass.merge150.wgt10.zgt2.wig	NHLF	lung	hotspots	Hotspots
119	1e-14	1	1	-2.89423e-17	5759.8	-11289.2	11289.2	0	6858	0	42264	118	NHLF-DS12829.twopass.merge150.wgt10.zgt2.wig	NHLF	lung	hotspots	Hotspots
119	1e-16	1	1	-2.89423e-17	5759.8	-11289.2	11289.2	0	6858	0	42264	118	NHLF-DS12829.twopass.merge150.wgt10.zgt2.wig	NHLF	lung	hotspots	Hotspots
119	1e-18	1	1	-2.89423e-17	5759.8	-11289.2	11289.2	0	6858	0	42264	118	NHLF-DS12829.twopass.merge150.wgt10.zgt2.wig	NHLF	lung	hotspots	Hotspots
119	1e-20	1	1	-2.89423e-17	5759.8	-11289.2	11289.2	0	6858	0	42264	118	NHLF-DS12829.twopass.merge150.wgt10.zgt2.wig	NHLF	lung	hotspots	Hotspots
120	0.01	1.20872	0.0962928	0.189564	0.113983	-0.0338417	0.41297	163	7678	750	42264	119	NT2_D1-DS14575.hg19.twopass.merge150.wgt10.zgt2.wig	NT2-D1	testis	hotspots	Hotspots
120	0.0001	0.980344	0.968983	-0.0198521	0.510547	-1.02053	0.980821	9	7678	36	42264	119	NT2_D1-DS14575.hg19.twopass.merge150.wgt10.zgt2.wig	NT2-D1	testis	hotspots	Hotspots
120	1e-06	4.754e-07	0.995982	-14.5591	2890.86	-5680.65	5651.53	0	7678	3	42264	119	NT2_D1-DS14575.hg19.twopass.merge150.wgt10.zgt2.wig	NT2-D1	testis	hotspots	Hotspots
120	1e-08	9.91445e-07	0.995996	-13.8241	2754.66	-5412.96	5385.32	0	7678	2	42264	119	NT2_D1-DS14575.hg19.twopass.merge150.wgt10.zgt2.wig	NT2-D1	testis	hotspots	Hotspots
120	1e-10	1	1	9.57861e-18	5621.94	-11019	11019	0	7678	0	42264	119	NT2_D1-DS14575.hg19.twopass.merge150.wgt10.zgt2.wig	NT2-D1	testis	hotspots	Hotspots
120	1e-12	1	1	9.57861e-18	5621.94	-11019	11019	0	7678	0	42264	119	NT2_D1-DS14575.hg19.twopass.merge150.wgt10.zgt2.wig	NT2-D1	testis	hotspots	Hotspots
120	1e-14	1	1	9.57861e-18	5621.94	-11019	11019	0	7678	0	42264	119	NT2_D1-DS14575.hg19.twopass.merge150.wgt10.zgt2.wig	NT2-D1	testis	hotspots	Hotspots
120	1e-16	1	1	9.57861e-18	5621.94	-11019	11019	0	7678	0	42264	119	NT2_D1-DS14575.hg19.twopass.merge150.wgt10.zgt2.wig	NT2-D1	testis	hotspots	Hotspots
120	1e-18	1	1	9.57861e-18	5621.94	-11019	11019	0	7678	0	42264	119	NT2_D1-DS14575.hg19.twopass.merge150.wgt10.zgt2.wig	NT2-D1	testis	hotspots	Hotspots
120	1e-20	1	1	9.57861e-18	5621.94	-11019	11019	0	7678	0	42264	119	NT2_D1-DS14575.hg19.twopass.merge150.wgt10.zgt2.wig	NT2-D1	testis	hotspots	Hotspots
121	0.01	1.27566	0.0418313	0.243467	0.119628	0.00899536	0.477939	126	6038	750	42264	120	PANC1-DS9955.twopass.merge150.wgt10.zgt2.wig	PANC-1	pancreas	hotspots	Hotspots
121	0.0001	1.07541	0.888438	0.0727065	0.51829	-0.943143	1.08856	7	6038	36	42264	120	PANC1-DS9955.twopass.merge150.wgt10.zgt2.wig	PANC-1	pancreas	hotspots	Hotspots
121	1e-06	8.56542e-07	0.996518	-13.9704	3201.69	-6289.29	6261.34	0	6038	3	42264	120	PANC1-DS9955.twopass.merge150.wgt10.zgt2.wig	PANC-1	pancreas	hotspots	Hotspots
121	1e-08	1.6362e-06	0.996537	-13.3231	3069.34	-6029.24	6002.59	0	6038	2	42264	120	PANC1-DS9955.twopass.merge150.wgt10.zgt2.wig	PANC-1	pancreas	hotspots	Hotspots
121	1e-10	1	1	1.89515e-17	6029.93	-11818.7	11818.7	0	6038	0	42264	120	PANC1-DS9955.twopass.merge150.wgt10.zgt2.wig	PANC-1	pancreas	hotspots	Hotspots
121	1e-12	1	1	1.89515e-17	6029.93	-11818.7	11818.7	0	6038	0	42264	120	PANC1-DS9955.twopass.merge150.wgt10.zgt2.wig	PANC-1	pancreas	hotspots	Hotspots
121	1e-14	1	1	1.89515e-17	6029.93	-11818.7	11818.7	0	6038	0	42264	120	PANC1-DS9955.twopass.merge150.wgt10.zgt2.wig	PANC-1	pancreas	hotspots	Hotspots
121	1e-16	1	1	1.89515e-17	6029.93	-11818.7	11818.7	0	6038	0	42264	120	PANC1-DS9955.twopass.merge150.wgt10.zgt2.wig	PANC-1	pancreas	hotspots	Hotspots
121	1e-18	1	1	1.89515e-17	6029.93	-11818.7	11818.7	0	6038	0	42264	120	PANC1-DS9955.twopass.merge150.wgt10.zgt2.wig	PANC-1	pancreas	hotspots	Hotspots
121	1e-20	1	1	1.89515e-17	6029.93	-11818.7	11818.7	0	6038	0	42264	120	PANC1-DS9955.twopass.merge150.wgt10.zgt2.wig	PANC-1	pancreas	hotspots	Hotspots
122	0.01	1.17259	0.18937	0.159216	0.121312	-0.0785563	0.396988	132	6436	750	42264	121	PrEC-DS12098.hg19.twopass.merge150.wgt10.zgt2.wig	PrEC	prostate	hotspots	Hotspots
122	0.0001	1.3141	0.596905	0.273148	0.516489	-0.739169	1.28547	8	6436	36	42264	121	PrEC-DS12098.hg19.twopass.merge150.wgt10.zgt2.wig	PrEC	prostate	hotspots	Hotspots
122	1e-06	7.02427e-07	0.996412	-14.1687	3150.61	-6189.37	6161.03	0	6436	3	42264	121	PrEC-DS12098.hg19.twopass.merge150.wgt10.zgt2.wig	PrEC	prostate	hotspots	Hotspots
122	1e-08	1.54604e-06	0.99645	-13.3798	3007.03	-5907.15	5880.39	0	6436	2	42264	121	PrEC-DS12098.hg19.twopass.merge150.wgt10.zgt2.wig	PrEC	prostate	hotspots	Hotspots
122	1e-10	1	1	4.37598e-17	6009.64	-11778.9	11778.9	0	6436	0	42264	121	PrEC-DS12098.hg19.twopass.merge150.wgt10.zgt2.wig	PrEC	prostate	hotspots	Hotspots
122	1e-12	1	1	4.37598e-17	6009.64	-11778.9	11778.9	0	6436	0	42264	121	PrEC-DS12098.hg19.twopass.merge150.wgt10.zgt2.wig	PrEC	prostate	hotspots	Hotspots
122	1e-14	1	1	4.37598e-17	6009.64	-11778.9	11778.9	0	6436	0	42264	121	PrEC-DS12098.hg19.twopass.merge150.wgt10.zgt2.wig	PrEC	prostate	hotspots	Hotspots
122	1e-16	1	1	4.37598e-17	6009.64	-11778.9	11778.9	0	6436	0	42264	121	PrEC-DS12098.hg19.twopass.merge150.wgt10.zgt2.wig	PrEC	prostate	hotspots	Hotspots
122	1e-18	1	1	4.37598e-17	6009.64	-11778.9	11778.9	0	6436	0	42264	121	PrEC-DS12098.hg19.twopass.merge150.wgt10.zgt2.wig	PrEC	prostate	hotspots	Hotspots
122	1e-20	1	1	4.37598e-17	6009.64	-11778.9	11778.9	0	6436	0	42264	121	PrEC-DS12098.hg19.twopass.merge150.wgt10.zgt2.wig	PrEC	prostate	hotspots	Hotspots
123	0.01	0.987812	0.920262	-0.0122631	0.122503	-0.25237	0.227844	124	6716	750	42264	122	RPTEC-DS14061.twopass.merge150.wgt10.zgt2.wig	RPTEC	epithelium	hotspots	Hotspots
123	0.0001	0.909196	0.856557	-0.0951947	0.526641	-1.12741	0.937021	7	6716	36	42264	122	RPTEC-DS14061.twopass.merge150.wgt10.zgt2.wig	RPTEC	epithelium	hotspots	Hotspots
123	1e-06	6.18799e-07	0.996298	-14.2955	3080.65	-6052.37	6023.78	0	6716	3	42264	122	RPTEC-DS14061.twopass.merge150.wgt10.zgt2.wig	RPTEC	epithelium	hotspots	Hotspots
123	1e-08	1.02336e-06	0.996272	-13.7924	2951.67	-5799.06	5771.47	0	6716	2	42264	122	RPTEC-DS14061.twopass.merge150.wgt10.zgt2.wig	RPTEC	epithelium	hotspots	Hotspots
123	1e-10	1	1	2.71556e-17	5849.12	-11464.3	11464.3	0	6716	0	42264	122	RPTEC-DS14061.twopass.merge150.wgt10.zgt2.wig	RPTEC	epithelium	hotspots	Hotspots
123	1e-12	1	1	2.71556e-17	5849.12	-11464.3	11464.3	0	6716	0	42264	122	RPTEC-DS14061.twopass.merge150.wgt10.zgt2.wig	RPTEC	epithelium	hotspots	Hotspots
123	1e-14	1	1	2.71556e-17	5849.12	-11464.3	11464.3	0	6716	0	42264	122	RPTEC-DS14061.twopass.merge150.wgt10.zgt2.wig	RPTEC	epithelium	hotspots	Hotspots
123	1e-16	1	1	2.71556e-17	5849.12	-11464.3	11464.3	0	6716	0	42264	122	RPTEC-DS14061.twopass.merge150.wgt10.zgt2.wig	RPTEC	epithelium	hotspots	Hotspots
123	1e-18	1	1	2.71556e-17	5849.12	-11464.3	11464.3	0	6716	0	42264	122	RPTEC-DS14061.twopass.merge150.wgt10.zgt2.wig	RPTEC	epithelium	hotspots	Hotspots
123	1e-20	1	1	2.71556e-17	5849.12	-11464.3	11464.3	0	6716	0	42264	122	RPTEC-DS14061.twopass.merge150.wgt10.zgt2.wig	RPTEC	epithelium	hotspots	Hotspots
124	0.01	1.19175	0.14611	0.175422	0.120697	-0.0611438	0.411988	127	6006	750	42264	123	RWPE_AllReps.30000000.twopass.merge150.wgt10.zgt2.wig	RWPE1	prostate	hotspots	Hotspots
124	0.0001	1.04555	0.931627	0.0445389	0.519117	-0.97293	1.06201	7	6006	36	42264	123	RWPE_AllReps.30000000.twopass.merge150.wgt10.zgt2.wig	RWPE1	prostate	hotspots	Hotspots
124	1e-06	8.77704e-07	0.996519	-13.946	3196.51	-6279.1	6251.21	0	6006	3	42264	123	RWPE_AllReps.30000000.twopass.merge150.wgt10.zgt2.wig	RWPE1	prostate	hotspots	Hotspots
124	1e-08	1.49176e-06	0.996503	-13.4156	3061.25	-6013.47	5986.64	0	6006	2	42264	123	RWPE_AllReps.30000000.twopass.merge150.wgt10.zgt2.wig	RWPE1	prostate	hotspots	Hotspots
124	1e-10	1	1	2.60201e-17	6004.83	-11769.5	11769.5	0	6006	0	42264	123	RWPE_AllReps.30000000.twopass.merge150.wgt10.zgt2.wig	RWPE1	prostate	hotspots	Hotspots
124	1e-12	1	1	2.60201e-17	6004.83	-11769.5	11769.5	0	6006	0	42264	123	RWPE_AllReps.30000000.twopass.merge150.wgt10.zgt2.wig	RWPE1	prostate	hotspots	Hotspots
124	1e-14	1	1	2.60201e-17	6004.83	-11769.5	11769.5	0	6006	0	42264	123	RWPE_AllReps.30000000.twopass.merge150.wgt10.zgt2.wig	RWPE1	prostate	hotspots	Hotspots
124	1e-16	1	1	2.60201e-17	6004.83	-11769.5	11769.5	0	6006	0	42264	123	RWPE_AllReps.30000000.twopass.merge150.wgt10.zgt2.wig	RWPE1	prostate	hotspots	Hotspots
124	1e-18	1	1	2.60201e-17	6004.83	-11769.5	11769.5	0	6006	0	42264	123	RWPE_AllReps.30000000.twopass.merge150.wgt10.zgt2.wig	RWPE1	prostate	hotspots	Hotspots
124	1e-20	1	1	2.60201e-17	6004.83	-11769.5	11769.5	0	6006	0	42264	123	RWPE_AllReps.30000000.twopass.merge150.wgt10.zgt2.wig	RWPE1	prostate	hotspots	Hotspots
125	0.01	1.01719	0.89075	0.0170395	0.124054	-0.226107	0.260186	121	6338	750	42264	124	SAEC-DS10518.twopass.merge150.wgt10.zgt2.wig	SAEC	epithelium	hotspots	Hotspots
125	0.0001	1.33213	0.573761	0.286777	0.509807	-0.712445	1.286	8	6338	36	42264	124	SAEC-DS10518.twopass.merge150.wgt10.zgt2.wig	SAEC	epithelium	hotspots	Hotspots
125	1e-06	1.13172e-06	0.996522	-13.6918	3140.73	-6169.52	6142.14	0	6338	3	42264	124	SAEC-DS10518.twopass.merge150.wgt10.zgt2.wig	SAEC	epithelium	hotspots	Hotspots
125	1e-08	2.46298e-06	0.996566	-12.9141	3000.77	-5894.43	5868.6	0	6338	2	42264	124	SAEC-DS10518.twopass.merge150.wgt10.zgt2.wig	SAEC	epithelium	hotspots	Hotspots
125	1e-10	1	1	2.58039e-17	5975.65	-11712.3	11712.3	0	6338	0	42264	124	SAEC-DS10518.twopass.merge150.wgt10.zgt2.wig	SAEC	epithelium	hotspots	Hotspots
125	1e-12	1	1	2.58039e-17	5975.65	-11712.3	11712.3	0	6338	0	42264	124	SAEC-DS10518.twopass.merge150.wgt10.zgt2.wig	SAEC	epithelium	hotspots	Hotspots
125	1e-14	1	1	2.58039e-17	5975.65	-11712.3	11712.3	0	6338	0	42264	124	SAEC-DS10518.twopass.merge150.wgt10.zgt2.wig	SAEC	epithelium	hotspots	Hotspots
125	1e-16	1	1	2.58039e-17	5975.65	-11712.3	11712.3	0	6338	0	42264	124	SAEC-DS10518.twopass.merge150.wgt10.zgt2.wig	SAEC	epithelium	hotspots	Hotspots
125	1e-18	1	1	2.58039e-17	5975.65	-11712.3	11712.3	0	6338	0	42264	124	SAEC-DS10518.twopass.merge150.wgt10.zgt2.wig	SAEC	epithelium	hotspots	Hotspots
125	1e-20	1	1	2.58039e-17	5975.65	-11712.3	11712.3	0	6338	0	42264	124	SAEC-DS10518.twopass.merge150.wgt10.zgt2.wig	SAEC	epithelium	hotspots	Hotspots
126	0.01	1.23872	0.070943	0.214081	0.118549	-0.0182753	0.446437	127	6284	750	42264	125	SkMC-DS11949.twopass.merge150.wgt10.zgt2.wig	SKMC	muscle	hotspots	Hotspots
126	0.0001	1.73098	0.264145	0.548688	0.49137	-0.414398	1.51177	9	6284	36	42264	125	SkMC-DS11949.twopass.merge150.wgt10.zgt2.wig	SKMC	muscle	hotspots	Hotspots
126	1e-06	6.27206e-07	0.996426	-14.282	3188.43	-6263.61	6235.04	0	6284	3	42264	125	SkMC-DS11949.twopass.merge150.wgt10.zgt2.wig	SKMC	muscle	hotspots	Hotspots
126	1e-08	1.26853e-06	0.996444	-13.5777	3046.36	-5984.44	5957.28	0	6284	2	42264	125	SkMC-DS11949.twopass.merge150.wgt10.zgt2.wig	SKMC	muscle	hotspots	Hotspots
126	1e-10	1	1	-2.34054e-17	5942.64	-11647.6	11647.6	0	6284	0	42264	125	SkMC-DS11949.twopass.merge150.wgt10.zgt2.wig	SKMC	muscle	hotspots	Hotspots
126	1e-12	1	1	-2.34054e-17	5942.64	-11647.6	11647.6	0	6284	0	42264	125	SkMC-DS11949.twopass.merge150.wgt10.zgt2.wig	SKMC	muscle	hotspots	Hotspots
126	1e-14	1	1	-2.34054e-17	5942.64	-11647.6	11647.6	0	6284	0	42264	125	SkMC-DS11949.twopass.merge150.wgt10.zgt2.wig	SKMC	muscle	hotspots	Hotspots
126	1e-16	1	1	-2.34054e-17	5942.64	-11647.6	11647.6	0	6284	0	42264	125	SkMC-DS11949.twopass.merge150.wgt10.zgt2.wig	SKMC	muscle	hotspots	Hotspots
126	1e-18	1	1	-2.34054e-17	5942.64	-11647.6	11647.6	0	6284	0	42264	125	SkMC-DS11949.twopass.merge150.wgt10.zgt2.wig	SKMC	muscle	hotspots	Hotspots
126	1e-20	1	1	-2.34054e-17	5942.64	-11647.6	11647.6	0	6284	0	42264	125	SkMC-DS11949.twopass.merge150.wgt10.zgt2.wig	SKMC	muscle	hotspots	Hotspots
127	0.01	1.00519	0.966791	0.00517868	0.12439	-0.238625	0.248982	128	6574	750	42264	126	SK_N_MC-DS14408.twopass.merge150.wgt10.zgt2.wig	SK-N-MC	brain	hotspots	Hotspots
127	0.0001	0.793511	0.66911	-0.231288	0.541189	-1.29202	0.829443	7	6574	36	42264	126	SK_N_MC-DS14408.twopass.merge150.wgt10.zgt2.wig	SK-N-MC	brain	hotspots	Hotspots
127	1e-06	7.33195e-07	0.996422	-14.1259	3150.12	-6188.35	6160.1	0	6574	3	42264	126	SK_N_MC-DS14408.twopass.merge150.wgt10.zgt2.wig	SK-N-MC	brain	hotspots	Hotspots
127	1e-08	2.15829e-06	0.996524	-13.0462	2995.01	-5883.26	5857.17	0	6574	2	42264	126	SK_N_MC-DS14408.twopass.merge150.wgt10.zgt2.wig	SK-N-MC	brain	hotspots	Hotspots
127	1e-10	1	1	-1.90416e-17	5969.08	-11699.4	11699.4	0	6574	0	42264	126	SK_N_MC-DS14408.twopass.merge150.wgt10.zgt2.wig	SK-N-MC	brain	hotspots	Hotspots
127	1e-12	1	1	-1.90416e-17	5969.08	-11699.4	11699.4	0	6574	0	42264	126	SK_N_MC-DS14408.twopass.merge150.wgt10.zgt2.wig	SK-N-MC	brain	hotspots	Hotspots
127	1e-14	1	1	-1.90416e-17	5969.08	-11699.4	11699.4	0	6574	0	42264	126	SK_N_MC-DS14408.twopass.merge150.wgt10.zgt2.wig	SK-N-MC	brain	hotspots	Hotspots
127	1e-16	1	1	-1.90416e-17	5969.08	-11699.4	11699.4	0	6574	0	42264	126	SK_N_MC-DS14408.twopass.merge150.wgt10.zgt2.wig	SK-N-MC	brain	hotspots	Hotspots
127	1e-18	1	1	-1.90416e-17	5969.08	-11699.4	11699.4	0	6574	0	42264	126	SK_N_MC-DS14408.twopass.merge150.wgt10.zgt2.wig	SK-N-MC	brain	hotspots	Hotspots
127	1e-20	1	1	-1.90416e-17	5969.08	-11699.4	11699.4	0	6574	0	42264	126	SK_N_MC-DS14408.twopass.merge150.wgt10.zgt2.wig	SK-N-MC	brain	hotspots	Hotspots
128	0.01	1.13441	0.378035	0.126113	0.143063	-0.15429	0.406517	76	3680	750	42264	127	SKNSH-DS8482.twopass.merge150.wgt10.zgt2.wig	SK-N-SH	brain	hotspots	Hotspots
128	0.0001	2.78413	0.0402916	1.02393	0.499298	0.0453099	2.00256	8	3680	36	42264	127	SKNSH-DS8482.twopass.merge150.wgt10.zgt2.wig	SK-N-SH	brain	hotspots	Hotspots
128	1e-06	1.04557e-06	0.997268	-13.7709	4022.24	-7897.37	7869.83	0	3680	3	42264	127	SKNSH-DS8482.twopass.merge150.wgt10.zgt2.wig	SK-N-SH	brain	hotspots	Hotspots
128	1e-08	3.6161e-06	0.99737	-12.5301	3800.85	-7462.19	7437.13	0	3680	2	42264	127	SKNSH-DS8482.twopass.merge150.wgt10.zgt2.wig	SK-N-SH	brain	hotspots	Hotspots
128	1e-10	1	1	-1.4644e-16	7157.68	-14029.1	14029.1	0	3680	0	42264	127	SKNSH-DS8482.twopass.merge150.wgt10.zgt2.wig	SK-N-SH	brain	hotspots	Hotspots
128	1e-12	1	1	-1.4644e-16	7157.68	-14029.1	14029.1	0	3680	0	42264	127	SKNSH-DS8482.twopass.merge150.wgt10.zgt2.wig	SK-N-SH	brain	hotspots	Hotspots
128	1e-14	1	1	-1.4644e-16	7157.68	-14029.1	14029.1	0	3680	0	42264	127	SKNSH-DS8482.twopass.merge150.wgt10.zgt2.wig	SK-N-SH	brain	hotspots	Hotspots
128	1e-16	1	1	-1.4644e-16	7157.68	-14029.1	14029.1	0	3680	0	42264	127	SKNSH-DS8482.twopass.merge150.wgt10.zgt2.wig	SK-N-SH	brain	hotspots	Hotspots
128	1e-18	1	1	-1.4644e-16	7157.68	-14029.1	14029.1	0	3680	0	42264	127	SKNSH-DS8482.twopass.merge150.wgt10.zgt2.wig	SK-N-SH	brain	hotspots	Hotspots
128	1e-20	1	1	-1.4644e-16	7157.68	-14029.1	14029.1	0	3680	0	42264	127	SKNSH-DS8482.twopass.merge150.wgt10.zgt2.wig	SK-N-SH	brain	hotspots	Hotspots
129	0.01	1.29232	0.0221528	0.256442	0.112094	0.0367375	0.476147	159	7431	750	42264	128	WERI_Rb1-DS13681.twopass.merge150.wgt10.zgt2.wig	WERI-Rb-1	eye	hotspots	Hotspots
129	0.0001	1.7632	0.237278	0.567132	0.479881	-0.373435	1.5077	10	7431	36	42264	128	WERI_Rb1-DS13681.twopass.merge150.wgt10.zgt2.wig	WERI-Rb-1	eye	hotspots	Hotspots
129	1e-06	4.63288e-07	0.996046	-14.5849	2943.16	-5783.17	5754	0	7431	3	42264	128	WERI_Rb1-DS13681.twopass.merge150.wgt10.zgt2.wig	WERI-Rb-1	eye	hotspots	Hotspots
129	1e-08	9.08052e-07	0.996044	-13.912	2805.57	-5512.83	5485.01	0	7431	2	42264	128	WERI_Rb1-DS13681.twopass.merge150.wgt10.zgt2.wig	WERI-Rb-1	eye	hotspots	Hotspots
129	1e-10	1	1	1.17845e-17	5613.84	-11003.1	11003.1	0	7431	0	42264	128	WERI_Rb1-DS13681.twopass.merge150.wgt10.zgt2.wig	WERI-Rb-1	eye	hotspots	Hotspots
129	1e-12	1	1	1.17845e-17	5613.84	-11003.1	11003.1	0	7431	0	42264	128	WERI_Rb1-DS13681.twopass.merge150.wgt10.zgt2.wig	WERI-Rb-1	eye	hotspots	Hotspots
129	1e-14	1	1	1.17845e-17	5613.84	-11003.1	11003.1	0	7431	0	42264	128	WERI_Rb1-DS13681.twopass.merge150.wgt10.zgt2.wig	WERI-Rb-1	eye	hotspots	Hotspots
129	1e-16	1	1	1.17845e-17	5613.84	-11003.1	11003.1	0	7431	0	42264	128	WERI_Rb1-DS13681.twopass.merge150.wgt10.zgt2.wig	WERI-Rb-1	eye	hotspots	Hotspots
129	1e-18	1	1	1.17845e-17	5613.84	-11003.1	11003.1	0	7431	0	42264	128	WERI_Rb1-DS13681.twopass.merge150.wgt10.zgt2.wig	WERI-Rb-1	eye	hotspots	Hotspots
129	1e-20	1	1	1.17845e-17	5613.84	-11003.1	11003.1	0	7431	0	42264	128	WERI_Rb1-DS13681.twopass.merge150.wgt10.zgt2.wig	WERI-Rb-1	eye	hotspots	Hotspots
130	0.01	1.41949	0.000894624	0.350298	0.105457	0.143603	0.556994	168	7490	750	42264	129	wgEncodeOpenChromDnase8988tAlnAllReps.30000000.twopass.merge150.wgt10.zgt2.wig	8988T	liver	hotspots	Hotspots
130	0.0001	2.92189	0.0142442	1.07223	0.437459	0.214813	1.92965	13	7490	36	42264	129	wgEncodeOpenChromDnase8988tAlnAllReps.30000000.twopass.merge150.wgt10.zgt2.wig	8988T	liver	hotspots	Hotspots
130	1e-06	4.65981e-07	0.995983	-14.5791	2895.7	-5690.16	5661	0	7490	3	42264	129	wgEncodeOpenChromDnase8988tAlnAllReps.30000000.twopass.merge150.wgt10.zgt2.wig	8988T	liver	hotspots	Hotspots
130	1e-08	1.35455e-06	0.996062	-13.512	2737.87	-5379.74	5352.72	0	7490	2	42264	129	wgEncodeOpenChromDnase8988tAlnAllReps.30000000.twopass.merge150.wgt10.zgt2.wig	8988T	liver	hotspots	Hotspots
130	1e-10	1	1	-2.31266e-17	5353.11	-10492.1	10492.1	0	7490	0	42264	129	wgEncodeOpenChromDnase8988tAlnAllReps.30000000.twopass.merge150.wgt10.zgt2.wig	8988T	liver	hotspots	Hotspots
130	1e-12	1	1	-2.31266e-17	5353.11	-10492.1	10492.1	0	7490	0	42264	129	wgEncodeOpenChromDnase8988tAlnAllReps.30000000.twopass.merge150.wgt10.zgt2.wig	8988T	liver	hotspots	Hotspots
130	1e-14	1	1	-2.31266e-17	5353.11	-10492.1	10492.1	0	7490	0	42264	129	wgEncodeOpenChromDnase8988tAlnAllReps.30000000.twopass.merge150.wgt10.zgt2.wig	8988T	liver	hotspots	Hotspots
130	1e-16	1	1	-2.31266e-17	5353.11	-10492.1	10492.1	0	7490	0	42264	129	wgEncodeOpenChromDnase8988tAlnAllReps.30000000.twopass.merge150.wgt10.zgt2.wig	8988T	liver	hotspots	Hotspots
130	1e-18	1	1	-2.31266e-17	5353.11	-10492.1	10492.1	0	7490	0	42264	129	wgEncodeOpenChromDnase8988tAlnAllReps.30000000.twopass.merge150.wgt10.zgt2.wig	8988T	liver	hotspots	Hotspots
130	1e-20	1	1	-2.31266e-17	5353.11	-10492.1	10492.1	0	7490	0	42264	129	wgEncodeOpenChromDnase8988tAlnAllReps.30000000.twopass.merge150.wgt10.zgt2.wig	8988T	liver	hotspots	Hotspots
131	0.01	1.29043	0.0312853	0.254976	0.118405	0.0229025	0.48705	139	6367	750	42264	130	wgEncodeOpenChromDnaseAosmcSerumfreeAlnAllReps.30000000.twopass.merge150.wgt10.zgt2.wig	AoSMC	blood_vessel	hotspots	Hotspots
131	0.0001	0.984863	0.976844	-0.0152524	0.525479	-1.04519	1.01469	8	6367	36	42264	130	wgEncodeOpenChromDnaseAosmcSerumfreeAlnAllReps.30000000.twopass.merge150.wgt10.zgt2.wig	AoSMC	blood_vessel	hotspots	Hotspots
131	1e-06	8.52506e-07	0.996449	-13.9751	3140.47	-6169.29	6141.34	0	6367	3	42264	130	wgEncodeOpenChromDnaseAosmcSerumfreeAlnAllReps.30000000.twopass.merge150.wgt10.zgt2.wig	AoSMC	blood_vessel	hotspots	Hotspots
131	1e-08	2.1598e-06	0.996523	-13.0455	2993.96	-5881.2	5855.11	0	6367	2	42264	130	wgEncodeOpenChromDnaseAosmcSerumfreeAlnAllReps.30000000.twopass.merge150.wgt10.zgt2.wig	AoSMC	blood_vessel	hotspots	Hotspots
131	1e-10	1	1	-7.05333e-18	5968.19	-11697.7	11697.7	0	6367	0	42264	130	wgEncodeOpenChromDnaseAosmcSerumfreeAlnAllReps.30000000.twopass.merge150.wgt10.zgt2.wig	AoSMC	blood_vessel	hotspots	Hotspots
131	1e-12	1	1	-7.05333e-18	5968.19	-11697.7	11697.7	0	6367	0	42264	130	wgEncodeOpenChromDnaseAosmcSerumfreeAlnAllReps.30000000.twopass.merge150.wgt10.zgt2.wig	AoSMC	blood_vessel	hotspots	Hotspots
131	1e-14	1	1	-7.05333e-18	5968.19	-11697.7	11697.7	0	6367	0	42264	130	wgEncodeOpenChromDnaseAosmcSerumfreeAlnAllReps.30000000.twopass.merge150.wgt10.zgt2.wig	AoSMC	blood_vessel	hotspots	Hotspots
131	1e-16	1	1	-7.05333e-18	5968.19	-11697.7	11697.7	0	6367	0	42264	130	wgEncodeOpenChromDnaseAosmcSerumfreeAlnAllReps.30000000.twopass.merge150.wgt10.zgt2.wig	AoSMC	blood_vessel	hotspots	Hotspots
131	1e-18	1	1	-7.05333e-18	5968.19	-11697.7	11697.7	0	6367	0	42264	130	wgEncodeOpenChromDnaseAosmcSerumfreeAlnAllReps.30000000.twopass.merge150.wgt10.zgt2.wig	AoSMC	blood_vessel	hotspots	Hotspots
131	1e-20	1	1	-7.05333e-18	5968.19	-11697.7	11697.7	0	6367	0	42264	130	wgEncodeOpenChromDnaseAosmcSerumfreeAlnAllReps.30000000.twopass.merge150.wgt10.zgt2.wig	AoSMC	blood_vessel	hotspots	Hotspots
132	0.01	1.56011	2.17481e-05	0.444758	0.104744	0.23946	0.650057	168	7365	750	42264	131	wgEncodeOpenChromDnaseChorionAlnAllReps.30000000.twopass.merge150.wgt10.zgt2.wig	Chorion	fetal_membrane	hotspots	Hotspots
132	0.0001	4.2708	0.000834451	1.4518	0.434527	0.600128	2.30347	15	7365	36	42264	131	wgEncodeOpenChromDnaseChorionAlnAllReps.30000000.twopass.merge150.wgt10.zgt2.wig	Chorion	fetal_membrane	hotspots	Hotspots
132	1e-06	4.77834e-07	0.996017	-14.554	2915.72	-5729.37	5700.27	0	7365	3	42264	131	wgEncodeOpenChromDnaseChorionAlnAllReps.30000000.twopass.merge150.wgt10.zgt2.wig	Chorion	fetal_membrane	hotspots	Hotspots
132	1e-08	1.33852e-06	0.996082	-13.5239	2754.22	-5411.79	5384.74	0	7365	2	42264	131	wgEncodeOpenChromDnaseChorionAlnAllReps.30000000.twopass.merge150.wgt10.zgt2.wig	Chorion	fetal_membrane	hotspots	Hotspots
132	1e-10	1	1	-1.26572e-17	5396.45	-10577	10577	0	7365	0	42264	131	wgEncodeOpenChromDnaseChorionAlnAllReps.30000000.twopass.merge150.wgt10.zgt2.wig	Chorion	fetal_membrane	hotspots	Hotspots
132	1e-12	1	1	-1.26572e-17	5396.45	-10577	10577	0	7365	0	42264	131	wgEncodeOpenChromDnaseChorionAlnAllReps.30000000.twopass.merge150.wgt10.zgt2.wig	Chorion	fetal_membrane	hotspots	Hotspots
132	1e-14	1	1	-1.26572e-17	5396.45	-10577	10577	0	7365	0	42264	131	wgEncodeOpenChromDnaseChorionAlnAllReps.30000000.twopass.merge150.wgt10.zgt2.wig	Chorion	fetal_membrane	hotspots	Hotspots
132	1e-16	1	1	-1.26572e-17	5396.45	-10577	10577	0	7365	0	42264	131	wgEncodeOpenChromDnaseChorionAlnAllReps.30000000.twopass.merge150.wgt10.zgt2.wig	Chorion	fetal_membrane	hotspots	Hotspots
132	1e-18	1	1	-1.26572e-17	5396.45	-10577	10577	0	7365	0	42264	131	wgEncodeOpenChromDnaseChorionAlnAllReps.30000000.twopass.merge150.wgt10.zgt2.wig	Chorion	fetal_membrane	hotspots	Hotspots
132	1e-20	1	1	-1.26572e-17	5396.45	-10577	10577	0	7365	0	42264	131	wgEncodeOpenChromDnaseChorionAlnAllReps.30000000.twopass.merge150.wgt10.zgt2.wig	Chorion	fetal_membrane	hotspots	Hotspots
133	0.01	1.29456	0.0254195	0.258168	0.115513	0.0317623	0.484574	134	5945	750	42264	132	wgEncodeOpenChromDnaseCllAlnAllReps.30000000.twopass.merge150.wgt10.zgt2.wig	CLL	blood	hotspots	Hotspots
133	0.0001	2.22843	0.0822059	0.801298	0.461039	-0.102338	1.70493	10	5945	36	42264	132	wgEncodeOpenChromDnaseCllAlnAllReps.30000000.twopass.merge150.wgt10.zgt2.wig	CLL	blood	hotspots	Hotspots
133	1e-06	4.81832e-07	0.996412	-14.5457	3234.94	-6355.03	6325.94	0	5945	3	42264	132	wgEncodeOpenChromDnaseCllAlnAllReps.30000000.twopass.merge150.wgt10.zgt2.wig	CLL	blood	hotspots	Hotspots
133	1e-08	1.07774e-06	0.996428	-13.7406	3069.4	-6029.77	6002.29	0	5945	2	42264	132	wgEncodeOpenChromDnaseCllAlnAllReps.30000000.twopass.merge150.wgt10.zgt2.wig	CLL	blood	hotspots	Hotspots
133	1e-10	1	1	-9.68379e-18	5849.16	-11464.4	11464.4	0	5945	0	42264	132	wgEncodeOpenChromDnaseCllAlnAllReps.30000000.twopass.merge150.wgt10.zgt2.wig	CLL	blood	hotspots	Hotspots
133	1e-12	1	1	-9.68379e-18	5849.16	-11464.4	11464.4	0	5945	0	42264	132	wgEncodeOpenChromDnaseCllAlnAllReps.30000000.twopass.merge150.wgt10.zgt2.wig	CLL	blood	hotspots	Hotspots
133	1e-14	1	1	-9.68379e-18	5849.16	-11464.4	11464.4	0	5945	0	42264	132	wgEncodeOpenChromDnaseCllAlnAllReps.30000000.twopass.merge150.wgt10.zgt2.wig	CLL	blood	hotspots	Hotspots
133	1e-16	1	1	-9.68379e-18	5849.16	-11464.4	11464.4	0	5945	0	42264	132	wgEncodeOpenChromDnaseCllAlnAllReps.30000000.twopass.merge150.wgt10.zgt2.wig	CLL	blood	hotspots	Hotspots
133	1e-18	1	1	-9.68379e-18	5849.16	-11464.4	11464.4	0	5945	0	42264	132	wgEncodeOpenChromDnaseCllAlnAllReps.30000000.twopass.merge150.wgt10.zgt2.wig	CLL	blood	hotspots	Hotspots
133	1e-20	1	1	-9.68379e-18	5849.16	-11464.4	11464.4	0	5945	0	42264	132	wgEncodeOpenChromDnaseCllAlnAllReps.30000000.twopass.merge150.wgt10.zgt2.wig	CLL	blood	hotspots	Hotspots
134	0.01	1.21212	0.0725522	0.192375	0.107134	-0.0176089	0.402358	166	8225	750	42264	133	wgEncodeOpenChromDnaseFibroblAlnAllReps.30000000.twopass.merge150.wgt10.zgt2.wig	Fibrobl	skin	hotspots	Hotspots
134	0.0001	3.80909	0.00228247	1.33739	0.438376	0.478173	2.19661	16	8225	36	42264	133	wgEncodeOpenChromDnaseFibroblAlnAllReps.30000000.twopass.merge150.wgt10.zgt2.wig	Fibrobl	skin	hotspots	Hotspots
134	1e-06	15.8036	0.0520478	2.76024	1.4208	-0.0245257	5.54501	1	8225	3	42264	133	wgEncodeOpenChromDnaseFibroblAlnAllReps.30000000.twopass.merge150.wgt10.zgt2.wig	Fibrobl	skin	hotspots	Hotspots
134	1e-08	9.25466e+07	0.989696	18.3432	1420.41	-2765.66	2802.35	1	8225	2	42264	133	wgEncodeOpenChromDnaseFibroblAlnAllReps.30000000.twopass.merge150.wgt10.zgt2.wig	Fibrobl	skin	hotspots	Hotspots
134	1e-10	1	1	-3.86165e-18	5268.03	-10325.3	10325.3	0	8225	0	42264	133	wgEncodeOpenChromDnaseFibroblAlnAllReps.30000000.twopass.merge150.wgt10.zgt2.wig	Fibrobl	skin	hotspots	Hotspots
134	1e-12	1	1	-3.86165e-18	5268.03	-10325.3	10325.3	0	8225	0	42264	133	wgEncodeOpenChromDnaseFibroblAlnAllReps.30000000.twopass.merge150.wgt10.zgt2.wig	Fibrobl	skin	hotspots	Hotspots
134	1e-14	1	1	-3.86165e-18	5268.03	-10325.3	10325.3	0	8225	0	42264	133	wgEncodeOpenChromDnaseFibroblAlnAllReps.30000000.twopass.merge150.wgt10.zgt2.wig	Fibrobl	skin	hotspots	Hotspots
134	1e-16	1	1	-3.86165e-18	5268.03	-10325.3	10325.3	0	8225	0	42264	133	wgEncodeOpenChromDnaseFibroblAlnAllReps.30000000.twopass.merge150.wgt10.zgt2.wig	Fibrobl	skin	hotspots	Hotspots
134	1e-18	1	1	-3.86165e-18	5268.03	-10325.3	10325.3	0	8225	0	42264	133	wgEncodeOpenChromDnaseFibroblAlnAllReps.30000000.twopass.merge150.wgt10.zgt2.wig	Fibrobl	skin	hotspots	Hotspots
134	1e-20	1	1	-3.86165e-18	5268.03	-10325.3	10325.3	0	8225	0	42264	133	wgEncodeOpenChromDnaseFibroblAlnAllReps.30000000.twopass.merge150.wgt10.zgt2.wig	Fibrobl	skin	hotspots	Hotspots
135	0.01	1.16503	0.159278	0.152744	0.108521	-0.0599574	0.365444	181	9049	750	42264	134	wgEncodeOpenChromDnaseFibropAlnAllReps.30000000.twopass.merge150.wgt10.zgt2.wig	FibroP	skin	hotspots	Hotspots
135	0.0001	1.22839	0.671594	0.205701	0.485189	-0.745269	1.15667	11	9049	36	42264	134	wgEncodeOpenChromDnaseFibropAlnAllReps.30000000.twopass.merge150.wgt10.zgt2.wig	FibroP	skin	hotspots	Hotspots
135	1e-06	3.91948e-07	0.995607	-14.7521	2679.53	-5266.62	5237.12	0	9049	3	42264	134	wgEncodeOpenChromDnaseFibropAlnAllReps.30000000.twopass.merge150.wgt10.zgt2.wig	FibroP	skin	hotspots	Hotspots
135	1e-08	9.16763e-07	0.995644	-13.9024	2546.53	-5005.1	4977.29	0	9049	2	42264	134	wgEncodeOpenChromDnaseFibropAlnAllReps.30000000.twopass.merge150.wgt10.zgt2.wig	FibroP	skin	hotspots	Hotspots
135	1e-10	1	1	-1.37686e-17	5282.98	-10354.6	10354.6	0	9049	0	42264	134	wgEncodeOpenChromDnaseFibropAlnAllReps.30000000.twopass.merge150.wgt10.zgt2.wig	FibroP	skin	hotspots	Hotspots
135	1e-12	1	1	-1.37686e-17	5282.98	-10354.6	10354.6	0	9049	0	42264	134	wgEncodeOpenChromDnaseFibropAlnAllReps.30000000.twopass.merge150.wgt10.zgt2.wig	FibroP	skin	hotspots	Hotspots
135	1e-14	1	1	-1.37686e-17	5282.98	-10354.6	10354.6	0	9049	0	42264	134	wgEncodeOpenChromDnaseFibropAlnAllReps.30000000.twopass.merge150.wgt10.zgt2.wig	FibroP	skin	hotspots	Hotspots
135	1e-16	1	1	-1.37686e-17	5282.98	-10354.6	10354.6	0	9049	0	42264	134	wgEncodeOpenChromDnaseFibropAlnAllReps.30000000.twopass.merge150.wgt10.zgt2.wig	FibroP	skin	hotspots	Hotspots
135	1e-18	1	1	-1.37686e-17	5282.98	-10354.6	10354.6	0	9049	0	42264	134	wgEncodeOpenChromDnaseFibropAlnAllReps.30000000.twopass.merge150.wgt10.zgt2.wig	FibroP	skin	hotspots	Hotspots
135	1e-20	1	1	-1.37686e-17	5282.98	-10354.6	10354.6	0	9049	0	42264	134	wgEncodeOpenChromDnaseFibropAlnAllReps.30000000.twopass.merge150.wgt10.zgt2.wig	FibroP	skin	hotspots	Hotspots
136	0.01	1.30803	0.0159157	0.268524	0.111382	0.0502156	0.486832	148	6743	750	42264	135	wgEncodeOpenChromDnaseGlioblaAlnAllReps.30000000.twopass.merge150.wgt10.zgt2.wig	Gliobla	brain	hotspots	Hotspots
136	0.0001	1.83041	0.191478	0.604539	0.462816	-0.30258	1.51166	10	6743	36	42264	135	wgEncodeOpenChromDnaseGlioblaAlnAllReps.30000000.twopass.merge150.wgt10.zgt2.wig	Gliobla	brain	hotspots	Hotspots
136	1e-06	7.18121e-07	0.996263	-14.1466	3020.08	-5933.5	5905.21	0	6743	3	42264	135	wgEncodeOpenChromDnaseGlioblaAlnAllReps.30000000.twopass.merge150.wgt10.zgt2.wig	Gliobla	brain	hotspots	Hotspots
136	1e-08	1.69581e-06	0.996308	-13.2873	2871.17	-5640.79	5614.21	0	6743	2	42264	135	wgEncodeOpenChromDnaseGlioblaAlnAllReps.30000000.twopass.merge150.wgt10.zgt2.wig	Gliobla	brain	hotspots	Hotspots
136	1e-10	1	1	-1.21304e-17	5607.72	-10991.1	10991.1	0	6743	0	42264	135	wgEncodeOpenChromDnaseGlioblaAlnAllReps.30000000.twopass.merge150.wgt10.zgt2.wig	Gliobla	brain	hotspots	Hotspots
136	1e-12	1	1	-1.21304e-17	5607.72	-10991.1	10991.1	0	6743	0	42264	135	wgEncodeOpenChromDnaseGlioblaAlnAllReps.30000000.twopass.merge150.wgt10.zgt2.wig	Gliobla	brain	hotspots	Hotspots
136	1e-14	1	1	-1.21304e-17	5607.72	-10991.1	10991.1	0	6743	0	42264	135	wgEncodeOpenChromDnaseGlioblaAlnAllReps.30000000.twopass.merge150.wgt10.zgt2.wig	Gliobla	brain	hotspots	Hotspots
136	1e-16	1	1	-1.21304e-17	5607.72	-10991.1	10991.1	0	6743	0	42264	135	wgEncodeOpenChromDnaseGlioblaAlnAllReps.30000000.twopass.merge150.wgt10.zgt2.wig	Gliobla	brain	hotspots	Hotspots
136	1e-18	1	1	-1.21304e-17	5607.72	-10991.1	10991.1	0	6743	0	42264	135	wgEncodeOpenChromDnaseGlioblaAlnAllReps.30000000.twopass.merge150.wgt10.zgt2.wig	Gliobla	brain	hotspots	Hotspots
136	1e-20	1	1	-1.21304e-17	5607.72	-10991.1	10991.1	0	6743	0	42264	135	wgEncodeOpenChromDnaseGlioblaAlnAllReps.30000000.twopass.merge150.wgt10.zgt2.wig	Gliobla	brain	hotspots	Hotspots
137	0.01	1.13785	0.256301	0.129138	0.11376	-0.0938321	0.352109	139	6602	750	42264	136	wgEncodeOpenChromDnaseGm12891AlnAllReps.30000000.twopass.merge150.wgt10.zgt2.wig	GM12891	blood	hotspots	Hotspots
137	0.0001	2.78775	0.0206695	1.02523	0.443063	0.15683	1.89364	13	6602	36	42264	136	wgEncodeOpenChromDnaseGm12891AlnAllReps.30000000.twopass.merge150.wgt10.zgt2.wig	GM12891	blood	hotspots	Hotspots
137	1e-06	5.21787e-07	0.996224	-14.466	3056.51	-6005.22	5976.29	0	6602	3	42264	136	wgEncodeOpenChromDnaseGm12891AlnAllReps.30000000.twopass.merge150.wgt10.zgt2.wig	GM12891	blood	hotspots	Hotspots
137	1e-08	1.12674e-06	0.996236	-13.6962	2903.08	-5703.73	5676.34	0	6602	2	42264	136	wgEncodeOpenChromDnaseGm12891AlnAllReps.30000000.twopass.merge150.wgt10.zgt2.wig	GM12891	blood	hotspots	Hotspots
137	1e-10	1	1	-1.87306e-17	5570.2	-10917.6	10917.6	0	6602	0	42264	136	wgEncodeOpenChromDnaseGm12891AlnAllReps.30000000.twopass.merge150.wgt10.zgt2.wig	GM12891	blood	hotspots	Hotspots
137	1e-12	1	1	-1.87306e-17	5570.2	-10917.6	10917.6	0	6602	0	42264	136	wgEncodeOpenChromDnaseGm12891AlnAllReps.30000000.twopass.merge150.wgt10.zgt2.wig	GM12891	blood	hotspots	Hotspots
137	1e-14	1	1	-1.87306e-17	5570.2	-10917.6	10917.6	0	6602	0	42264	136	wgEncodeOpenChromDnaseGm12891AlnAllReps.30000000.twopass.merge150.wgt10.zgt2.wig	GM12891	blood	hotspots	Hotspots
137	1e-16	1	1	-1.87306e-17	5570.2	-10917.6	10917.6	0	6602	0	42264	136	wgEncodeOpenChromDnaseGm12891AlnAllReps.30000000.twopass.merge150.wgt10.zgt2.wig	GM12891	blood	hotspots	Hotspots
137	1e-18	1	1	-1.87306e-17	5570.2	-10917.6	10917.6	0	6602	0	42264	136	wgEncodeOpenChromDnaseGm12891AlnAllReps.30000000.twopass.merge150.wgt10.zgt2.wig	GM12891	blood	hotspots	Hotspots
137	1e-20	1	1	-1.87306e-17	5570.2	-10917.6	10917.6	0	6602	0	42264	136	wgEncodeOpenChromDnaseGm12891AlnAllReps.30000000.twopass.merge150.wgt10.zgt2.wig	GM12891	blood	hotspots	Hotspots
138	0.01	1.09925	0.399833	0.0946236	0.11239	-0.125662	0.314909	136	6768	750	42264	137	wgEncodeOpenChromDnaseGm12892AlnAllReps.30000000.twopass.merge150.wgt10.zgt2.wig	GM12892	blood	hotspots	Hotspots
138	0.0001	2.66344	0.0250907	0.979618	0.437329	0.122453	1.83678	12	6768	36	42264	137	wgEncodeOpenChromDnaseGm12892AlnAllReps.30000000.twopass.merge150.wgt10.zgt2.wig	GM12892	blood	hotspots	Hotspots
138	1e-06	4.60699e-07	0.996134	-14.5905	3011.25	-5916.65	5887.47	0	6768	3	42264	137	wgEncodeOpenChromDnaseGm12892AlnAllReps.30000000.twopass.merge150.wgt10.zgt2.wig	GM12892	blood	hotspots	Hotspots
138	1e-08	1.35144e-06	0.996204	-13.5143	2840.65	-5581.2	5554.17	0	6768	2	42264	137	wgEncodeOpenChromDnaseGm12892AlnAllReps.30000000.twopass.merge150.wgt10.zgt2.wig	GM12892	blood	hotspots	Hotspots
138	1e-10	1	1	-7.26575e-18	5461.44	-10704.4	10704.4	0	6768	0	42264	137	wgEncodeOpenChromDnaseGm12892AlnAllReps.30000000.twopass.merge150.wgt10.zgt2.wig	GM12892	blood	hotspots	Hotspots
138	1e-12	1	1	-7.26575e-18	5461.44	-10704.4	10704.4	0	6768	0	42264	137	wgEncodeOpenChromDnaseGm12892AlnAllReps.30000000.twopass.merge150.wgt10.zgt2.wig	GM12892	blood	hotspots	Hotspots
138	1e-14	1	1	-7.26575e-18	5461.44	-10704.4	10704.4	0	6768	0	42264	137	wgEncodeOpenChromDnaseGm12892AlnAllReps.30000000.twopass.merge150.wgt10.zgt2.wig	GM12892	blood	hotspots	Hotspots
138	1e-16	1	1	-7.26575e-18	5461.44	-10704.4	10704.4	0	6768	0	42264	137	wgEncodeOpenChromDnaseGm12892AlnAllReps.30000000.twopass.merge150.wgt10.zgt2.wig	GM12892	blood	hotspots	Hotspots
138	1e-18	1	1	-7.26575e-18	5461.44	-10704.4	10704.4	0	6768	0	42264	137	wgEncodeOpenChromDnaseGm12892AlnAllReps.30000000.twopass.merge150.wgt10.zgt2.wig	GM12892	blood	hotspots	Hotspots
138	1e-20	1	1	-7.26575e-18	5461.44	-10704.4	10704.4	0	6768	0	42264	137	wgEncodeOpenChromDnaseGm12892AlnAllReps.30000000.twopass.merge150.wgt10.zgt2.wig	GM12892	blood	hotspots	Hotspots
139	0.01	1.16176	0.215295	0.149938	0.121002	-0.0872257	0.387101	122	5822	750	42264	138	wgEncodeOpenChromDnaseGm18507AlnAllReps.30000000.twopass.merge150.wgt10.zgt2.wig	GM18507	blood	hotspots	Hotspots
139	0.0001	2.81316	0.0261002	1.03431	0.464917	0.123071	1.94555	11	5822	36	42264	138	wgEncodeOpenChromDnaseGm18507AlnAllReps.30000000.twopass.merge150.wgt10.zgt2.wig	GM18507	blood	hotspots	Hotspots
139	1e-06	5.37844e-07	0.996462	-14.4357	3255.78	-6395.76	6366.89	0	5822	3	42264	138	wgEncodeOpenChromDnaseGm18507AlnAllReps.30000000.twopass.merge150.wgt10.zgt2.wig	GM18507	blood	hotspots	Hotspots
139	1e-08	1.22911e-06	0.996491	-13.6092	3094.82	-6079.45	6052.24	0	5822	2	42264	138	wgEncodeOpenChromDnaseGm18507AlnAllReps.30000000.twopass.merge150.wgt10.zgt2.wig	GM18507	blood	hotspots	Hotspots
139	1e-10	1	1	3.33079e-17	5990.85	-11742.1	11742.1	0	5822	0	42264	138	wgEncodeOpenChromDnaseGm18507AlnAllReps.30000000.twopass.merge150.wgt10.zgt2.wig	GM18507	blood	hotspots	Hotspots
139	1e-12	1	1	3.33079e-17	5990.85	-11742.1	11742.1	0	5822	0	42264	138	wgEncodeOpenChromDnaseGm18507AlnAllReps.30000000.twopass.merge150.wgt10.zgt2.wig	GM18507	blood	hotspots	Hotspots
139	1e-14	1	1	3.33079e-17	5990.85	-11742.1	11742.1	0	5822	0	42264	138	wgEncodeOpenChromDnaseGm18507AlnAllReps.30000000.twopass.merge150.wgt10.zgt2.wig	GM18507	blood	hotspots	Hotspots
139	1e-16	1	1	3.33079e-17	5990.85	-11742.1	11742.1	0	5822	0	42264	138	wgEncodeOpenChromDnaseGm18507AlnAllReps.30000000.twopass.merge150.wgt10.zgt2.wig	GM18507	blood	hotspots	Hotspots
139	1e-18	1	1	3.33079e-17	5990.85	-11742.1	11742.1	0	5822	0	42264	138	wgEncodeOpenChromDnaseGm18507AlnAllReps.30000000.twopass.merge150.wgt10.zgt2.wig	GM18507	blood	hotspots	Hotspots
139	1e-20	1	1	3.33079e-17	5990.85	-11742.1	11742.1	0	5822	0	42264	138	wgEncodeOpenChromDnaseGm18507AlnAllReps.30000000.twopass.merge150.wgt10.zgt2.wig	GM18507	blood	hotspots	Hotspots
140	0.01	1.02476	0.834015	0.024461	0.116729	-0.204327	0.253249	131	6760	750	42264	139	wgEncodeOpenChromDnaseGm19238AlnAllReps.30000000.twopass.merge150.wgt10.zgt2.wig	GM19238	blood	hotspots	Hotspots
140	0.0001	1.79233	0.210315	0.583516	0.465807	-0.329466	1.4965	10	6760	36	42264	139	wgEncodeOpenChromDnaseGm19238AlnAllReps.30000000.twopass.merge150.wgt10.zgt2.wig	GM19238	blood	hotspots	Hotspots
140	1e-06	5.50068e-07	0.996196	-14.4132	3022.76	-5939.02	5910.19	0	6760	3	42264	139	wgEncodeOpenChromDnaseGm19238AlnAllReps.30000000.twopass.merge150.wgt10.zgt2.wig	GM19238	blood	hotspots	Hotspots
140	1e-08	1.43165e-06	0.996256	-13.4567	2867.56	-5633.87	5606.96	0	6760	2	42264	139	wgEncodeOpenChromDnaseGm19238AlnAllReps.30000000.twopass.merge150.wgt10.zgt2.wig	GM19238	blood	hotspots	Hotspots
140	1e-10	1	1	-4.06241e-18	5597.78	-10971.6	10971.6	0	6760	0	42264	139	wgEncodeOpenChromDnaseGm19238AlnAllReps.30000000.twopass.merge150.wgt10.zgt2.wig	GM19238	blood	hotspots	Hotspots
140	1e-12	1	1	-4.06241e-18	5597.78	-10971.6	10971.6	0	6760	0	42264	139	wgEncodeOpenChromDnaseGm19238AlnAllReps.30000000.twopass.merge150.wgt10.zgt2.wig	GM19238	blood	hotspots	Hotspots
140	1e-14	1	1	-4.06241e-18	5597.78	-10971.6	10971.6	0	6760	0	42264	139	wgEncodeOpenChromDnaseGm19238AlnAllReps.30000000.twopass.merge150.wgt10.zgt2.wig	GM19238	blood	hotspots	Hotspots
140	1e-16	1	1	-4.06241e-18	5597.78	-10971.6	10971.6	0	6760	0	42264	139	wgEncodeOpenChromDnaseGm19238AlnAllReps.30000000.twopass.merge150.wgt10.zgt2.wig	GM19238	blood	hotspots	Hotspots
140	1e-18	1	1	-4.06241e-18	5597.78	-10971.6	10971.6	0	6760	0	42264	139	wgEncodeOpenChromDnaseGm19238AlnAllReps.30000000.twopass.merge150.wgt10.zgt2.wig	GM19238	blood	hotspots	Hotspots
140	1e-20	1	1	-4.06241e-18	5597.78	-10971.6	10971.6	0	6760	0	42264	139	wgEncodeOpenChromDnaseGm19238AlnAllReps.30000000.twopass.merge150.wgt10.zgt2.wig	GM19238	blood	hotspots	Hotspots
141	0.01	1.30388	0.0201508	0.265348	0.1142	0.041515	0.48918	137	6251	750	42264	140	wgEncodeOpenChromDnaseGm19239AlnAllReps.30000000.twopass.merge150.wgt10.zgt2.wig	GM19239	blood	hotspots	Hotspots
141	0.0001	2.50655	0.044976	0.918908	0.458336	0.0205696	1.81725	12	6251	36	42264	140	wgEncodeOpenChromDnaseGm19239AlnAllReps.30000000.twopass.merge150.wgt10.zgt2.wig	GM19239	blood	hotspots	Hotspots
141	1e-06	7.08905e-07	0.99639	-14.1595	3129.43	-6147.84	6119.52	0	6251	3	42264	140	wgEncodeOpenChromDnaseGm19239AlnAllReps.30000000.twopass.merge150.wgt10.zgt2.wig	GM19239	blood	hotspots	Hotspots
141	1e-08	1.94886e-06	0.996465	-13.1483	2968.04	-5830.51	5804.21	0	6251	2	42264	140	wgEncodeOpenChromDnaseGm19239AlnAllReps.30000000.twopass.merge150.wgt10.zgt2.wig	GM19239	blood	hotspots	Hotspots
141	1e-10	1	1	1.83413e-17	5763.6	-11296.6	11296.6	0	6251	0	42264	140	wgEncodeOpenChromDnaseGm19239AlnAllReps.30000000.twopass.merge150.wgt10.zgt2.wig	GM19239	blood	hotspots	Hotspots
141	1e-12	1	1	1.83413e-17	5763.6	-11296.6	11296.6	0	6251	0	42264	140	wgEncodeOpenChromDnaseGm19239AlnAllReps.30000000.twopass.merge150.wgt10.zgt2.wig	GM19239	blood	hotspots	Hotspots
141	1e-14	1	1	1.83413e-17	5763.6	-11296.6	11296.6	0	6251	0	42264	140	wgEncodeOpenChromDnaseGm19239AlnAllReps.30000000.twopass.merge150.wgt10.zgt2.wig	GM19239	blood	hotspots	Hotspots
141	1e-16	1	1	1.83413e-17	5763.6	-11296.6	11296.6	0	6251	0	42264	140	wgEncodeOpenChromDnaseGm19239AlnAllReps.30000000.twopass.merge150.wgt10.zgt2.wig	GM19239	blood	hotspots	Hotspots
141	1e-18	1	1	1.83413e-17	5763.6	-11296.6	11296.6	0	6251	0	42264	140	wgEncodeOpenChromDnaseGm19239AlnAllReps.30000000.twopass.merge150.wgt10.zgt2.wig	GM19239	blood	hotspots	Hotspots
141	1e-20	1	1	1.83413e-17	5763.6	-11296.6	11296.6	0	6251	0	42264	140	wgEncodeOpenChromDnaseGm19239AlnAllReps.30000000.twopass.merge150.wgt10.zgt2.wig	GM19239	blood	hotspots	Hotspots
142	0.01	1.20695	0.087505	0.188097	0.110081	-0.0276625	0.403856	157	7625	750	42264	141	wgEncodeOpenChromDnaseGm19240AlnAllReps.30000000.twopass.merge150.wgt10.zgt2.wig	GM19240	blood	hotspots	Hotspots
142	0.0001	3.50744	0.00493653	1.25489	0.446397	0.379949	2.12982	14	7625	36	42264	141	wgEncodeOpenChromDnaseGm19240AlnAllReps.30000000.twopass.merge150.wgt10.zgt2.wig	GM19240	blood	hotspots	Hotspots
142	1e-06	7.00518e-07	0.996041	-14.1714	2856.14	-5612.2	5583.86	0	7625	3	42264	141	wgEncodeOpenChromDnaseGm19240AlnAllReps.30000000.twopass.merge150.wgt10.zgt2.wig	GM19240	blood	hotspots	Hotspots
142	1e-08	1.36805e-06	0.996046	-13.5021	2724.33	-5353.2	5326.19	0	7625	2	42264	141	wgEncodeOpenChromDnaseGm19240AlnAllReps.30000000.twopass.merge150.wgt10.zgt2.wig	GM19240	blood	hotspots	Hotspots
142	1e-10	1	1	-1.61626e-17	5425.13	-10633.2	10633.2	0	7625	0	42264	141	wgEncodeOpenChromDnaseGm19240AlnAllReps.30000000.twopass.merge150.wgt10.zgt2.wig	GM19240	blood	hotspots	Hotspots
142	1e-12	1	1	-1.61626e-17	5425.13	-10633.2	10633.2	0	7625	0	42264	141	wgEncodeOpenChromDnaseGm19240AlnAllReps.30000000.twopass.merge150.wgt10.zgt2.wig	GM19240	blood	hotspots	Hotspots
142	1e-14	1	1	-1.61626e-17	5425.13	-10633.2	10633.2	0	7625	0	42264	141	wgEncodeOpenChromDnaseGm19240AlnAllReps.30000000.twopass.merge150.wgt10.zgt2.wig	GM19240	blood	hotspots	Hotspots
142	1e-16	1	1	-1.61626e-17	5425.13	-10633.2	10633.2	0	7625	0	42264	141	wgEncodeOpenChromDnaseGm19240AlnAllReps.30000000.twopass.merge150.wgt10.zgt2.wig	GM19240	blood	hotspots	Hotspots
142	1e-18	1	1	-1.61626e-17	5425.13	-10633.2	10633.2	0	7625	0	42264	141	wgEncodeOpenChromDnaseGm19240AlnAllReps.30000000.twopass.merge150.wgt10.zgt2.wig	GM19240	blood	hotspots	Hotspots
142	1e-20	1	1	-1.61626e-17	5425.13	-10633.2	10633.2	0	7625	0	42264	141	wgEncodeOpenChromDnaseGm19240AlnAllReps.30000000.twopass.merge150.wgt10.zgt2.wig	GM19240	blood	hotspots	Hotspots
143	0.01	1.17981	0.158669	0.165356	0.11731	-0.0645721	0.395284	139	6442	750	42264	142	wgEncodeOpenChromDnaseH9esAlnAllReps.30000000.twopass.merge150.wgt10.zgt2.wig	H9ES	es_cell	hotspots	Hotspots
143	0.0001	1.28208	0.615896	0.248484	0.495308	-0.72232	1.21929	9	6442	36	42264	142	wgEncodeOpenChromDnaseH9esAlnAllReps.30000000.twopass.merge150.wgt10.zgt2.wig	H9ES	es_cell	hotspots	Hotspots
143	1e-06	9.2776e-07	0.996397	-13.8905	3076.35	-6043.54	6015.76	0	6442	3	42264	142	wgEncodeOpenChromDnaseH9esAlnAllReps.30000000.twopass.merge150.wgt10.zgt2.wig	H9ES	es_cell	hotspots	Hotspots
143	1e-08	1.78271e-06	0.996408	-13.2374	2940.51	-5776.64	5750.17	0	6442	2	42264	142	wgEncodeOpenChromDnaseH9esAlnAllReps.30000000.twopass.merge150.wgt10.zgt2.wig	H9ES	es_cell	hotspots	Hotspots
143	1e-10	1	1	-5.63085e-18	5806.85	-11381.4	11381.4	0	6442	0	42264	142	wgEncodeOpenChromDnaseH9esAlnAllReps.30000000.twopass.merge150.wgt10.zgt2.wig	H9ES	es_cell	hotspots	Hotspots
143	1e-12	1	1	-5.63085e-18	5806.85	-11381.4	11381.4	0	6442	0	42264	142	wgEncodeOpenChromDnaseH9esAlnAllReps.30000000.twopass.merge150.wgt10.zgt2.wig	H9ES	es_cell	hotspots	Hotspots
143	1e-14	1	1	-5.63085e-18	5806.85	-11381.4	11381.4	0	6442	0	42264	142	wgEncodeOpenChromDnaseH9esAlnAllReps.30000000.twopass.merge150.wgt10.zgt2.wig	H9ES	es_cell	hotspots	Hotspots
143	1e-16	1	1	-5.63085e-18	5806.85	-11381.4	11381.4	0	6442	0	42264	142	wgEncodeOpenChromDnaseH9esAlnAllReps.30000000.twopass.merge150.wgt10.zgt2.wig	H9ES	es_cell	hotspots	Hotspots
143	1e-18	1	1	-5.63085e-18	5806.85	-11381.4	11381.4	0	6442	0	42264	142	wgEncodeOpenChromDnaseH9esAlnAllReps.30000000.twopass.merge150.wgt10.zgt2.wig	H9ES	es_cell	hotspots	Hotspots
143	1e-20	1	1	-5.63085e-18	5806.85	-11381.4	11381.4	0	6442	0	42264	142	wgEncodeOpenChromDnaseH9esAlnAllReps.30000000.twopass.merge150.wgt10.zgt2.wig	H9ES	es_cell	hotspots	Hotspots
144	0.01	1.13834	0.289331	0.129567	0.122281	-0.110103	0.369237	123	5920	750	42264	143	wgEncodeOpenChromDnaseHelas3Ifna4hAlnAllReps.30000000.twopass.merge150.wgt10.zgt2.wig	HeLa-S3	cervix	hotspots	Hotspots
144	0.0001	1.8165	0.221259	0.596912	0.487997	-0.359562	1.55339	10	5920	36	42264	143	wgEncodeOpenChromDnaseHelas3Ifna4hAlnAllReps.30000000.twopass.merge150.wgt10.zgt2.wig	HeLa-S3	cervix	hotspots	Hotspots
144	1e-06	5.25249e-07	0.996464	-14.4594	3262.26	-6408.5	6379.58	0	5920	3	42264	143	wgEncodeOpenChromDnaseHelas3Ifna4hAlnAllReps.30000000.twopass.merge150.wgt10.zgt2.wig	HeLa-S3	cervix	hotspots	Hotspots
144	1e-08	1.61748e-06	0.996554	-13.3346	3087.06	-6063.96	6037.29	0	5920	2	42264	143	wgEncodeOpenChromDnaseHelas3Ifna4hAlnAllReps.30000000.twopass.merge150.wgt10.zgt2.wig	HeLa-S3	cervix	hotspots	Hotspots
144	1e-10	1	1	2.26147e-18	6032.68	-11824	11824	0	5920	0	42264	143	wgEncodeOpenChromDnaseHelas3Ifna4hAlnAllReps.30000000.twopass.merge150.wgt10.zgt2.wig	HeLa-S3	cervix	hotspots	Hotspots
144	1e-12	1	1	2.26147e-18	6032.68	-11824	11824	0	5920	0	42264	143	wgEncodeOpenChromDnaseHelas3Ifna4hAlnAllReps.30000000.twopass.merge150.wgt10.zgt2.wig	HeLa-S3	cervix	hotspots	Hotspots
144	1e-14	1	1	2.26147e-18	6032.68	-11824	11824	0	5920	0	42264	143	wgEncodeOpenChromDnaseHelas3Ifna4hAlnAllReps.30000000.twopass.merge150.wgt10.zgt2.wig	HeLa-S3	cervix	hotspots	Hotspots
144	1e-16	1	1	2.26147e-18	6032.68	-11824	11824	0	5920	0	42264	143	wgEncodeOpenChromDnaseHelas3Ifna4hAlnAllReps.30000000.twopass.merge150.wgt10.zgt2.wig	HeLa-S3	cervix	hotspots	Hotspots
144	1e-18	1	1	2.26147e-18	6032.68	-11824	11824	0	5920	0	42264	143	wgEncodeOpenChromDnaseHelas3Ifna4hAlnAllReps.30000000.twopass.merge150.wgt10.zgt2.wig	HeLa-S3	cervix	hotspots	Hotspots
144	1e-20	1	1	2.26147e-18	6032.68	-11824	11824	0	5920	0	42264	143	wgEncodeOpenChromDnaseHelas3Ifna4hAlnAllReps.30000000.twopass.merge150.wgt10.zgt2.wig	HeLa-S3	cervix	hotspots	Hotspots
145	0.01	1.2059	0.0928918	0.18723	0.111424	-0.0311612	0.405621	145	7180	750	42264	144	wgEncodeOpenChromDnaseHepatocytesAlnAllReps.30000000.twopass.merge150.wgt10.zgt2.wig	Hepatocytes	liver	hotspots	Hotspots
145	0.0001	2.48853	0.0428773	0.911692	0.45024	0.0292219	1.79416	13	7180	36	42264	144	wgEncodeOpenChromDnaseHepatocytesAlnAllReps.30000000.twopass.merge150.wgt10.zgt2.wig	Hepatocytes	liver	hotspots	Hotspots
145	1e-06	7.0363e-07	0.99616	-14.167	2943.66	-5783.73	5755.4	0	7180	3	42264	144	wgEncodeOpenChromDnaseHepatocytesAlnAllReps.30000000.twopass.merge150.wgt10.zgt2.wig	Hepatocytes	liver	hotspots	Hotspots
145	1e-08	1.63281e-06	0.9962	-13.3252	2798.12	-5497.63	5470.98	0	7180	2	42264	144	wgEncodeOpenChromDnaseHepatocytesAlnAllReps.30000000.twopass.merge150.wgt10.zgt2.wig	Hepatocytes	liver	hotspots	Hotspots
145	1e-10	1	1	2.25134e-17	5497.86	-10775.8	10775.8	0	7180	0	42264	144	wgEncodeOpenChromDnaseHepatocytesAlnAllReps.30000000.twopass.merge150.wgt10.zgt2.wig	Hepatocytes	liver	hotspots	Hotspots
145	1e-12	1	1	2.25134e-17	5497.86	-10775.8	10775.8	0	7180	0	42264	144	wgEncodeOpenChromDnaseHepatocytesAlnAllReps.30000000.twopass.merge150.wgt10.zgt2.wig	Hepatocytes	liver	hotspots	Hotspots
145	1e-14	1	1	2.25134e-17	5497.86	-10775.8	10775.8	0	7180	0	42264	144	wgEncodeOpenChromDnaseHepatocytesAlnAllReps.30000000.twopass.merge150.wgt10.zgt2.wig	Hepatocytes	liver	hotspots	Hotspots
145	1e-16	1	1	2.25134e-17	5497.86	-10775.8	10775.8	0	7180	0	42264	144	wgEncodeOpenChromDnaseHepatocytesAlnAllReps.30000000.twopass.merge150.wgt10.zgt2.wig	Hepatocytes	liver	hotspots	Hotspots
145	1e-18	1	1	2.25134e-17	5497.86	-10775.8	10775.8	0	7180	0	42264	144	wgEncodeOpenChromDnaseHepatocytesAlnAllReps.30000000.twopass.merge150.wgt10.zgt2.wig	Hepatocytes	liver	hotspots	Hotspots
145	1e-20	1	1	2.25134e-17	5497.86	-10775.8	10775.8	0	7180	0	42264	144	wgEncodeOpenChromDnaseHepatocytesAlnAllReps.30000000.twopass.merge150.wgt10.zgt2.wig	Hepatocytes	liver	hotspots	Hotspots
146	0.01	1.04249	0.738024	0.0416162	0.124424	-0.202254	0.285486	112	5937	750	42264	145	wgEncodeOpenChromDnaseHpde6e6e7AlnAllReps.30000000.twopass.merge150.wgt10.zgt2.wig	HPDE6-E6E7	pancreatic_duct	hotspots	Hotspots
146	0.0001	1.06848	0.898722	0.0662355	0.520409	-0.953766	1.08624	8	5937	36	42264	145	wgEncodeOpenChromDnaseHpde6e6e7AlnAllReps.30000000.twopass.merge150.wgt10.zgt2.wig	HPDE6-E6E7	pancreatic_duct	hotspots	Hotspots
146	1e-06	6.75605e-07	0.996496	-14.2077	3235.62	-6356.03	6327.61	0	5937	3	42264	145	wgEncodeOpenChromDnaseHpde6e6e7AlnAllReps.30000000.twopass.merge150.wgt10.zgt2.wig	HPDE6-E6E7	pancreatic_duct	hotspots	Hotspots
146	1e-08	1.62119e-06	0.99655	-13.3323	3083.52	-6057.02	6030.36	0	5937	2	42264	145	wgEncodeOpenChromDnaseHpde6e6e7AlnAllReps.30000000.twopass.merge150.wgt10.zgt2.wig	HPDE6-E6E7	pancreatic_duct	hotspots	Hotspots
146	1e-10	1	1	2.20877e-17	6028.36	-11815.6	11815.6	0	5937	0	42264	145	wgEncodeOpenChromDnaseHpde6e6e7AlnAllReps.30000000.twopass.merge150.wgt10.zgt2.wig	HPDE6-E6E7	pancreatic_duct	hotspots	Hotspots
146	1e-12	1	1	2.20877e-17	6028.36	-11815.6	11815.6	0	5937	0	42264	145	wgEncodeOpenChromDnaseHpde6e6e7AlnAllReps.30000000.twopass.merge150.wgt10.zgt2.wig	HPDE6-E6E7	pancreatic_duct	hotspots	Hotspots
146	1e-14	1	1	2.20877e-17	6028.36	-11815.6	11815.6	0	5937	0	42264	145	wgEncodeOpenChromDnaseHpde6e6e7AlnAllReps.30000000.twopass.merge150.wgt10.zgt2.wig	HPDE6-E6E7	pancreatic_duct	hotspots	Hotspots
146	1e-16	1	1	2.20877e-17	6028.36	-11815.6	11815.6	0	5937	0	42264	145	wgEncodeOpenChromDnaseHpde6e6e7AlnAllReps.30000000.twopass.merge150.wgt10.zgt2.wig	HPDE6-E6E7	pancreatic_duct	hotspots	Hotspots
146	1e-18	1	1	2.20877e-17	6028.36	-11815.6	11815.6	0	5937	0	42264	145	wgEncodeOpenChromDnaseHpde6e6e7AlnAllReps.30000000.twopass.merge150.wgt10.zgt2.wig	HPDE6-E6E7	pancreatic_duct	hotspots	Hotspots
146	1e-20	1	1	2.20877e-17	6028.36	-11815.6	11815.6	0	5937	0	42264	145	wgEncodeOpenChromDnaseHpde6e6e7AlnAllReps.30000000.twopass.merge150.wgt10.zgt2.wig	HPDE6-E6E7	pancreatic_duct	hotspots	Hotspots
147	0.01	1.16714	0.20017	0.154554	0.120645	-0.0819097	0.391018	119	5790	750	42264	146	wgEncodeOpenChromDnaseHtr8AlnAllReps.30000000.twopass.merge150.wgt10.zgt2.wig	HTR8svn	blastula	hotspots	Hotspots
147	0.0001	1.11544	0.830518	0.109253	0.510437	-0.891204	1.10971	7	5790	36	42264	146	wgEncodeOpenChromDnaseHtr8AlnAllReps.30000000.twopass.merge150.wgt10.zgt2.wig	HTR8svn	blastula	hotspots	Hotspots
147	1e-06	8.0205e-07	0.996541	-14.0361	3237.74	-6360.01	6331.94	0	5790	3	42264	146	wgEncodeOpenChromDnaseHtr8AlnAllReps.30000000.twopass.merge150.wgt10.zgt2.wig	HTR8svn	blastula	hotspots	Hotspots
147	1e-08	2.04302e-06	0.996604	-13.1011	3078.34	-6046.64	6020.44	0	5790	2	42264	146	wgEncodeOpenChromDnaseHtr8AlnAllReps.30000000.twopass.merge150.wgt10.zgt2.wig	HTR8svn	blastula	hotspots	Hotspots
147	1e-10	1	1	1.03282e-17	5983.13	-11726.9	11726.9	0	5790	0	42264	146	wgEncodeOpenChromDnaseHtr8AlnAllReps.30000000.twopass.merge150.wgt10.zgt2.wig	HTR8svn	blastula	hotspots	Hotspots
147	1e-12	1	1	1.03282e-17	5983.13	-11726.9	11726.9	0	5790	0	42264	146	wgEncodeOpenChromDnaseHtr8AlnAllReps.30000000.twopass.merge150.wgt10.zgt2.wig	HTR8svn	blastula	hotspots	Hotspots
147	1e-14	1	1	1.03282e-17	5983.13	-11726.9	11726.9	0	5790	0	42264	146	wgEncodeOpenChromDnaseHtr8AlnAllReps.30000000.twopass.merge150.wgt10.zgt2.wig	HTR8svn	blastula	hotspots	Hotspots
147	1e-16	1	1	1.03282e-17	5983.13	-11726.9	11726.9	0	5790	0	42264	146	wgEncodeOpenChromDnaseHtr8AlnAllReps.30000000.twopass.merge150.wgt10.zgt2.wig	HTR8svn	blastula	hotspots	Hotspots
147	1e-18	1	1	1.03282e-17	5983.13	-11726.9	11726.9	0	5790	0	42264	146	wgEncodeOpenChromDnaseHtr8AlnAllReps.30000000.twopass.merge150.wgt10.zgt2.wig	HTR8svn	blastula	hotspots	Hotspots
147	1e-20	1	1	1.03282e-17	5983.13	-11726.9	11726.9	0	5790	0	42264	146	wgEncodeOpenChromDnaseHtr8AlnAllReps.30000000.twopass.merge150.wgt10.zgt2.wig	HTR8svn	blastula	hotspots	Hotspots
148	0.01	1.33035	0.00870137	0.285439	0.108798	0.072195	0.498683	163	7313	750	42264	147	wgEncodeOpenChromDnaseHuh75AlnAllReps.30000000.twopass.merge150.wgt10.zgt2.wig	Huh-7.5	liver	hotspots	Hotspots
148	0.0001	3.04282	0.0126691	1.11279	0.446375	0.237891	1.98768	13	7313	36	42264	147	wgEncodeOpenChromDnaseHuh75AlnAllReps.30000000.twopass.merge150.wgt10.zgt2.wig	Huh-7.5	liver	hotspots	Hotspots
148	1e-06	7.42122e-07	0.996119	-14.1138	2901.92	-5701.87	5673.64	0	7313	3	42264	147	wgEncodeOpenChromDnaseHuh75AlnAllReps.30000000.twopass.merge150.wgt10.zgt2.wig	Huh-7.5	liver	hotspots	Hotspots
148	1e-08	2.03063e-06	0.996204	-13.1072	2755.16	-5413.23	5387.02	0	7313	2	42264	147	wgEncodeOpenChromDnaseHuh75AlnAllReps.30000000.twopass.merge150.wgt10.zgt2.wig	Huh-7.5	liver	hotspots	Hotspots
148	1e-10	1	1	1.21742e-17	5462.56	-10706.6	10706.6	0	7313	0	42264	147	wgEncodeOpenChromDnaseHuh75AlnAllReps.30000000.twopass.merge150.wgt10.zgt2.wig	Huh-7.5	liver	hotspots	Hotspots
148	1e-12	1	1	1.21742e-17	5462.56	-10706.6	10706.6	0	7313	0	42264	147	wgEncodeOpenChromDnaseHuh75AlnAllReps.30000000.twopass.merge150.wgt10.zgt2.wig	Huh-7.5	liver	hotspots	Hotspots
148	1e-14	1	1	1.21742e-17	5462.56	-10706.6	10706.6	0	7313	0	42264	147	wgEncodeOpenChromDnaseHuh75AlnAllReps.30000000.twopass.merge150.wgt10.zgt2.wig	Huh-7.5	liver	hotspots	Hotspots
148	1e-16	1	1	1.21742e-17	5462.56	-10706.6	10706.6	0	7313	0	42264	147	wgEncodeOpenChromDnaseHuh75AlnAllReps.30000000.twopass.merge150.wgt10.zgt2.wig	Huh-7.5	liver	hotspots	Hotspots
148	1e-18	1	1	1.21742e-17	5462.56	-10706.6	10706.6	0	7313	0	42264	147	wgEncodeOpenChromDnaseHuh75AlnAllReps.30000000.twopass.merge150.wgt10.zgt2.wig	Huh-7.5	liver	hotspots	Hotspots
148	1e-20	1	1	1.21742e-17	5462.56	-10706.6	10706.6	0	7313	0	42264	147	wgEncodeOpenChromDnaseHuh75AlnAllReps.30000000.twopass.merge150.wgt10.zgt2.wig	Huh-7.5	liver	hotspots	Hotspots
149	0.01	1.26283	0.0414946	0.233354	0.11447	0.00899205	0.457716	142	6397	750	42264	148	wgEncodeOpenChromDnaseHuh7AlnAllReps.30000000.twopass.merge150.wgt10.zgt2.wig	Huh-7	liver	hotspots	Hotspots
149	0.0001	1.56824	0.346019	0.449952	0.477485	-0.485918	1.38582	9	6397	36	42264	148	wgEncodeOpenChromDnaseHuh7AlnAllReps.30000000.twopass.merge150.wgt10.zgt2.wig	Huh-7	liver	hotspots	Hotspots
149	1e-06	6.64289e-07	0.996337	-14.2245	3098.16	-6086.61	6058.17	0	6397	3	42264	148	wgEncodeOpenChromDnaseHuh7AlnAllReps.30000000.twopass.merge150.wgt10.zgt2.wig	Huh-7	liver	hotspots	Hotspots
149	1e-08	1.35042e-06	0.996348	-13.5151	2952.54	-5800.5	5773.47	0	6397	2	42264	148	wgEncodeOpenChromDnaseHuh7AlnAllReps.30000000.twopass.merge150.wgt10.zgt2.wig	Huh-7	liver	hotspots	Hotspots
149	1e-10	1	1	2.41621e-17	5733.96	-11238.6	11238.6	0	6397	0	42264	148	wgEncodeOpenChromDnaseHuh7AlnAllReps.30000000.twopass.merge150.wgt10.zgt2.wig	Huh-7	liver	hotspots	Hotspots
149	1e-12	1	1	2.41621e-17	5733.96	-11238.6	11238.6	0	6397	0	42264	148	wgEncodeOpenChromDnaseHuh7AlnAllReps.30000000.twopass.merge150.wgt10.zgt2.wig	Huh-7	liver	hotspots	Hotspots
149	1e-14	1	1	2.41621e-17	5733.96	-11238.6	11238.6	0	6397	0	42264	148	wgEncodeOpenChromDnaseHuh7AlnAllReps.30000000.twopass.merge150.wgt10.zgt2.wig	Huh-7	liver	hotspots	Hotspots
149	1e-16	1	1	2.41621e-17	5733.96	-11238.6	11238.6	0	6397	0	42264	148	wgEncodeOpenChromDnaseHuh7AlnAllReps.30000000.twopass.merge150.wgt10.zgt2.wig	Huh-7	liver	hotspots	Hotspots
149	1e-18	1	1	2.41621e-17	5733.96	-11238.6	11238.6	0	6397	0	42264	148	wgEncodeOpenChromDnaseHuh7AlnAllReps.30000000.twopass.merge150.wgt10.zgt2.wig	Huh-7	liver	hotspots	Hotspots
149	1e-20	1	1	2.41621e-17	5733.96	-11238.6	11238.6	0	6397	0	42264	148	wgEncodeOpenChromDnaseHuh7AlnAllReps.30000000.twopass.merge150.wgt10.zgt2.wig	Huh-7	liver	hotspots	Hotspots
150	0.01	1.41499	0.000999394	0.347123	0.105486	0.14037	0.553876	168	7373	750	42264	149	wgEncodeOpenChromDnaseIpsAlnAllReps.30000000.twopass.merge150.wgt10.zgt2.wig	iPS	ips_cell	hotspots	Hotspots
150	0.0001	2.99866	0.0118498	1.09817	0.436371	0.242878	1.95345	13	7373	36	42264	149	wgEncodeOpenChromDnaseIpsAlnAllReps.30000000.twopass.merge150.wgt10.zgt2.wig	iPS	ips_cell	hotspots	Hotspots
150	1e-06	4.36646e-07	0.995996	-14.6441	2918.5	-5734.91	5705.62	0	7373	3	42264	149	wgEncodeOpenChromDnaseIpsAlnAllReps.30000000.twopass.merge150.wgt10.zgt2.wig	iPS	ips_cell	hotspots	Hotspots
150	1e-08	1.44117e-06	0.996099	-13.4501	2750.8	-5405.02	5378.12	0	7373	2	42264	149	wgEncodeOpenChromDnaseIpsAlnAllReps.30000000.twopass.merge150.wgt10.zgt2.wig	iPS	ips_cell	hotspots	Hotspots
150	1e-10	1	1	-1.85318e-17	5365.12	-10515.6	10515.6	0	7373	0	42264	149	wgEncodeOpenChromDnaseIpsAlnAllReps.30000000.twopass.merge150.wgt10.zgt2.wig	iPS	ips_cell	hotspots	Hotspots
150	1e-12	1	1	-1.85318e-17	5365.12	-10515.6	10515.6	0	7373	0	42264	149	wgEncodeOpenChromDnaseIpsAlnAllReps.30000000.twopass.merge150.wgt10.zgt2.wig	iPS	ips_cell	hotspots	Hotspots
150	1e-14	1	1	-1.85318e-17	5365.12	-10515.6	10515.6	0	7373	0	42264	149	wgEncodeOpenChromDnaseIpsAlnAllReps.30000000.twopass.merge150.wgt10.zgt2.wig	iPS	ips_cell	hotspots	Hotspots
150	1e-16	1	1	-1.85318e-17	5365.12	-10515.6	10515.6	0	7373	0	42264	149	wgEncodeOpenChromDnaseIpsAlnAllReps.30000000.twopass.merge150.wgt10.zgt2.wig	iPS	ips_cell	hotspots	Hotspots
150	1e-18	1	1	-1.85318e-17	5365.12	-10515.6	10515.6	0	7373	0	42264	149	wgEncodeOpenChromDnaseIpsAlnAllReps.30000000.twopass.merge150.wgt10.zgt2.wig	iPS	ips_cell	hotspots	Hotspots
150	1e-20	1	1	-1.85318e-17	5365.12	-10515.6	10515.6	0	7373	0	42264	149	wgEncodeOpenChromDnaseIpsAlnAllReps.30000000.twopass.merge150.wgt10.zgt2.wig	iPS	ips_cell	hotspots	Hotspots
151	0.01	1.37333	0.0046563	0.31724	0.112103	0.0975181	0.536962	145	6283	750	42264	150	wgEncodeOpenChromDnaseLncapAndroAlnAllReps.30000000.twopass.merge150.wgt10.zgt2.wig	LNCaP	prostate	hotspots	Hotspots
151	0.0001	4.49861	0.000690636	1.50377	0.443162	0.635171	2.37237	15	6283	36	42264	150	wgEncodeOpenChromDnaseLncapAndroAlnAllReps.30000000.twopass.merge150.wgt10.zgt2.wig	LNCaP	prostate	hotspots	Hotspots
151	1e-06	5.6365e-07	0.996315	-14.3888	3115.6	-6120.97	6092.2	0	6283	3	42264	150	wgEncodeOpenChromDnaseLncapAndroAlnAllReps.30000000.twopass.merge150.wgt10.zgt2.wig	LNCaP	prostate	hotspots	Hotspots
151	1e-08	1.46644e-06	0.99637	-13.4327	2952.58	-5800.48	5773.62	0	6283	2	42264	150	wgEncodeOpenChromDnaseLncapAndroAlnAllReps.30000000.twopass.merge150.wgt10.zgt2.wig	LNCaP	prostate	hotspots	Hotspots
151	1e-10	1	1	1.7523e-17	5712.55	-11196.6	11196.6	0	6283	0	42264	150	wgEncodeOpenChromDnaseLncapAndroAlnAllReps.30000000.twopass.merge150.wgt10.zgt2.wig	LNCaP	prostate	hotspots	Hotspots
151	1e-12	1	1	1.7523e-17	5712.55	-11196.6	11196.6	0	6283	0	42264	150	wgEncodeOpenChromDnaseLncapAndroAlnAllReps.30000000.twopass.merge150.wgt10.zgt2.wig	LNCaP	prostate	hotspots	Hotspots
151	1e-14	1	1	1.7523e-17	5712.55	-11196.6	11196.6	0	6283	0	42264	150	wgEncodeOpenChromDnaseLncapAndroAlnAllReps.30000000.twopass.merge150.wgt10.zgt2.wig	LNCaP	prostate	hotspots	Hotspots
151	1e-16	1	1	1.7523e-17	5712.55	-11196.6	11196.6	0	6283	0	42264	150	wgEncodeOpenChromDnaseLncapAndroAlnAllReps.30000000.twopass.merge150.wgt10.zgt2.wig	LNCaP	prostate	hotspots	Hotspots
151	1e-18	1	1	1.7523e-17	5712.55	-11196.6	11196.6	0	6283	0	42264	150	wgEncodeOpenChromDnaseLncapAndroAlnAllReps.30000000.twopass.merge150.wgt10.zgt2.wig	LNCaP	prostate	hotspots	Hotspots
151	1e-20	1	1	1.7523e-17	5712.55	-11196.6	11196.6	0	6283	0	42264	150	wgEncodeOpenChromDnaseLncapAndroAlnAllReps.30000000.twopass.merge150.wgt10.zgt2.wig	LNCaP	prostate	hotspots	Hotspots
152	0.01	1.23799	0.0630926	0.213486	0.114867	-0.0116547	0.438626	139	6374	750	42264	151	wgEncodeOpenChromDnaseMcf7HypoxlacAlnAllReps.30000000.twopass.merge150.wgt10.zgt2.wig	MCF-7	breast	hotspots	Hotspots
152	0.0001	1.63068	0.303717	0.488999	0.475451	-0.442886	1.42088	9	6374	36	42264	151	wgEncodeOpenChromDnaseMcf7HypoxlacAlnAllReps.30000000.twopass.merge150.wgt10.zgt2.wig	MCF-7	breast	hotspots	Hotspots
152	1e-06	6.16757e-07	0.996349	-14.2988	3124.47	-6138.25	6109.66	0	6374	3	42264	151	wgEncodeOpenChromDnaseMcf7HypoxlacAlnAllReps.30000000.twopass.merge150.wgt10.zgt2.wig	MCF-7	breast	hotspots	Hotspots
152	1e-08	1.3295e-06	0.996372	-13.5307	2975.69	-5845.88	5818.82	0	6374	2	42264	151	wgEncodeOpenChromDnaseMcf7HypoxlacAlnAllReps.30000000.twopass.merge150.wgt10.zgt2.wig	MCF-7	breast	hotspots	Hotspots
152	1e-10	1	1	1.26497e-17	5748	-11266.1	11266.1	0	6374	0	42264	151	wgEncodeOpenChromDnaseMcf7HypoxlacAlnAllReps.30000000.twopass.merge150.wgt10.zgt2.wig	MCF-7	breast	hotspots	Hotspots
152	1e-12	1	1	1.26497e-17	5748	-11266.1	11266.1	0	6374	0	42264	151	wgEncodeOpenChromDnaseMcf7HypoxlacAlnAllReps.30000000.twopass.merge150.wgt10.zgt2.wig	MCF-7	breast	hotspots	Hotspots
152	1e-14	1	1	1.26497e-17	5748	-11266.1	11266.1	0	6374	0	42264	151	wgEncodeOpenChromDnaseMcf7HypoxlacAlnAllReps.30000000.twopass.merge150.wgt10.zgt2.wig	MCF-7	breast	hotspots	Hotspots
152	1e-16	1	1	1.26497e-17	5748	-11266.1	11266.1	0	6374	0	42264	151	wgEncodeOpenChromDnaseMcf7HypoxlacAlnAllReps.30000000.twopass.merge150.wgt10.zgt2.wig	MCF-7	breast	hotspots	Hotspots
152	1e-18	1	1	1.26497e-17	5748	-11266.1	11266.1	0	6374	0	42264	151	wgEncodeOpenChromDnaseMcf7HypoxlacAlnAllReps.30000000.twopass.merge150.wgt10.zgt2.wig	MCF-7	breast	hotspots	Hotspots
152	1e-20	1	1	1.26497e-17	5748	-11266.1	11266.1	0	6374	0	42264	151	wgEncodeOpenChromDnaseMcf7HypoxlacAlnAllReps.30000000.twopass.merge150.wgt10.zgt2.wig	MCF-7	breast	hotspots	Hotspots
153	0.01	1.27188	0.0219521	0.240494	0.104964	0.0347637	0.446224	181	8534	750	42264	152	wgEncodeOpenChromDnaseMedulloAlnAllReps.30000000.twopass.merge150.wgt10.zgt2.wig	Medullo	brain	hotspots	Hotspots
153	0.0001	2.9598	0.0133514	1.08512	0.438566	0.225535	1.94471	14	8534	36	42264	152	wgEncodeOpenChromDnaseMedulloAlnAllReps.30000000.twopass.merge150.wgt10.zgt2.wig	Medullo	brain	hotspots	Hotspots
153	1e-06	3.34354e-07	0.995668	-14.9111	2746.37	-5397.79	5367.97	0	8534	3	42264	152	wgEncodeOpenChromDnaseMedulloAlnAllReps.30000000.twopass.merge150.wgt10.zgt2.wig	Medullo	brain	hotspots	Hotspots
153	1e-08	7.18333e-07	0.995675	-14.1463	2609.87	-5129.5	5101.2	0	8534	2	42264	152	wgEncodeOpenChromDnaseMedulloAlnAllReps.30000000.twopass.merge150.wgt10.zgt2.wig	Medullo	brain	hotspots	Hotspots
153	1e-10	1	1	-1.57321e-17	5198.02	-10188.1	10188.1	0	8534	0	42264	152	wgEncodeOpenChromDnaseMedulloAlnAllReps.30000000.twopass.merge150.wgt10.zgt2.wig	Medullo	brain	hotspots	Hotspots
153	1e-12	1	1	-1.57321e-17	5198.02	-10188.1	10188.1	0	8534	0	42264	152	wgEncodeOpenChromDnaseMedulloAlnAllReps.30000000.twopass.merge150.wgt10.zgt2.wig	Medullo	brain	hotspots	Hotspots
153	1e-14	1	1	-1.57321e-17	5198.02	-10188.1	10188.1	0	8534	0	42264	152	wgEncodeOpenChromDnaseMedulloAlnAllReps.30000000.twopass.merge150.wgt10.zgt2.wig	Medullo	brain	hotspots	Hotspots
153	1e-16	1	1	-1.57321e-17	5198.02	-10188.1	10188.1	0	8534	0	42264	152	wgEncodeOpenChromDnaseMedulloAlnAllReps.30000000.twopass.merge150.wgt10.zgt2.wig	Medullo	brain	hotspots	Hotspots
153	1e-18	1	1	-1.57321e-17	5198.02	-10188.1	10188.1	0	8534	0	42264	152	wgEncodeOpenChromDnaseMedulloAlnAllReps.30000000.twopass.merge150.wgt10.zgt2.wig	Medullo	brain	hotspots	Hotspots
153	1e-20	1	1	-1.57321e-17	5198.02	-10188.1	10188.1	0	8534	0	42264	152	wgEncodeOpenChromDnaseMedulloAlnAllReps.30000000.twopass.merge150.wgt10.zgt2.wig	Medullo	brain	hotspots	Hotspots
154	0.01	1.46423	0.000275746	0.381328	0.104845	0.175833	0.586824	221	10102	750	42264	153	wgEncodeOpenChromDnaseMelanoAlnAllReps.30000000.twopass.merge150.wgt10.zgt2.wig	Melano	skin	hotspots	Hotspots
154	0.0001	6.0521	8.00233e-05	1.8004	0.456454	0.905755	2.69505	19	10102	36	42264	153	wgEncodeOpenChromDnaseMelanoAlnAllReps.30000000.twopass.merge150.wgt10.zgt2.wig	Melano	skin	hotspots	Hotspots
154	1e-06	4.59025e-07	0.995449	-14.5942	2558.47	-5029.19	5000.01	0	10102	3	42264	153	wgEncodeOpenChromDnaseMelanoAlnAllReps.30000000.twopass.merge150.wgt10.zgt2.wig	Melano	skin	hotspots	Hotspots
154	1e-08	9.56573e-07	0.995471	-13.8599	2441.54	-4799.27	4771.55	0	10102	2	42264	153	wgEncodeOpenChromDnaseMelanoAlnAllReps.30000000.twopass.merge150.wgt10.zgt2.wig	Melano	skin	hotspots	Hotspots
154	1e-10	1	1	-1.85071e-19	5234.46	-10259.5	10259.5	0	10102	0	42264	153	wgEncodeOpenChromDnaseMelanoAlnAllReps.30000000.twopass.merge150.wgt10.zgt2.wig	Melano	skin	hotspots	Hotspots
154	1e-12	1	1	-1.85071e-19	5234.46	-10259.5	10259.5	0	10102	0	42264	153	wgEncodeOpenChromDnaseMelanoAlnAllReps.30000000.twopass.merge150.wgt10.zgt2.wig	Melano	skin	hotspots	Hotspots
154	1e-14	1	1	-1.85071e-19	5234.46	-10259.5	10259.5	0	10102	0	42264	153	wgEncodeOpenChromDnaseMelanoAlnAllReps.30000000.twopass.merge150.wgt10.zgt2.wig	Melano	skin	hotspots	Hotspots
154	1e-16	1	1	-1.85071e-19	5234.46	-10259.5	10259.5	0	10102	0	42264	153	wgEncodeOpenChromDnaseMelanoAlnAllReps.30000000.twopass.merge150.wgt10.zgt2.wig	Melano	skin	hotspots	Hotspots
154	1e-18	1	1	-1.85071e-19	5234.46	-10259.5	10259.5	0	10102	0	42264	153	wgEncodeOpenChromDnaseMelanoAlnAllReps.30000000.twopass.merge150.wgt10.zgt2.wig	Melano	skin	hotspots	Hotspots
154	1e-20	1	1	-1.85071e-19	5234.46	-10259.5	10259.5	0	10102	0	42264	153	wgEncodeOpenChromDnaseMelanoAlnAllReps.30000000.twopass.merge150.wgt10.zgt2.wig	Melano	skin	hotspots	Hotspots
155	0.01	1.30046	0.0209254	0.262716	0.113763	0.0397406	0.485691	151	6772	750	42264	154	wgEncodeOpenChromDnaseMyometrAlnAllReps.30000000.twopass.merge150.wgt10.zgt2.wig	Myometr	myometrium	hotspots	Hotspots
155	0.0001	2.30047	0.0753386	0.833114	0.468463	-0.0850741	1.7513	12	6772	36	42264	154	wgEncodeOpenChromDnaseMyometrAlnAllReps.30000000.twopass.merge150.wgt10.zgt2.wig	Myometr	myometrium	hotspots	Hotspots
155	1e-06	6.05765e-07	0.996248	-14.3168	3044.86	-5982.24	5953.61	0	6772	3	42264	154	wgEncodeOpenChromDnaseMyometrAlnAllReps.30000000.twopass.merge150.wgt10.zgt2.wig	Myometr	myometrium	hotspots	Hotspots
155	1e-08	1.52902e-06	0.996305	-13.3909	2891.53	-5680.79	5654	0	6772	2	42264	154	wgEncodeOpenChromDnaseMyometrAlnAllReps.30000000.twopass.merge150.wgt10.zgt2.wig	Myometr	myometrium	hotspots	Hotspots
155	1e-10	1	1	9.89046e-18	5712.4	-11196.3	11196.3	0	6772	0	42264	154	wgEncodeOpenChromDnaseMyometrAlnAllReps.30000000.twopass.merge150.wgt10.zgt2.wig	Myometr	myometrium	hotspots	Hotspots
155	1e-12	1	1	9.89046e-18	5712.4	-11196.3	11196.3	0	6772	0	42264	154	wgEncodeOpenChromDnaseMyometrAlnAllReps.30000000.twopass.merge150.wgt10.zgt2.wig	Myometr	myometrium	hotspots	Hotspots
155	1e-14	1	1	9.89046e-18	5712.4	-11196.3	11196.3	0	6772	0	42264	154	wgEncodeOpenChromDnaseMyometrAlnAllReps.30000000.twopass.merge150.wgt10.zgt2.wig	Myometr	myometrium	hotspots	Hotspots
155	1e-16	1	1	9.89046e-18	5712.4	-11196.3	11196.3	0	6772	0	42264	154	wgEncodeOpenChromDnaseMyometrAlnAllReps.30000000.twopass.merge150.wgt10.zgt2.wig	Myometr	myometrium	hotspots	Hotspots
155	1e-18	1	1	9.89046e-18	5712.4	-11196.3	11196.3	0	6772	0	42264	154	wgEncodeOpenChromDnaseMyometrAlnAllReps.30000000.twopass.merge150.wgt10.zgt2.wig	Myometr	myometrium	hotspots	Hotspots
155	1e-20	1	1	9.89046e-18	5712.4	-11196.3	11196.3	0	6772	0	42264	154	wgEncodeOpenChromDnaseMyometrAlnAllReps.30000000.twopass.merge150.wgt10.zgt2.wig	Myometr	myometrium	hotspots	Hotspots
156	0.01	1.05242	0.634601	0.0510957	0.107511	-0.159626	0.261817	178	8923	750	42264	155	wgEncodeOpenChromDnaseOsteoblAlnAllReps.30000000.twopass.merge150.wgt10.zgt2.wig	Osteobl	bone	hotspots	Hotspots
156	0.0001	2.79339	0.0205078	1.02726	0.44337	0.15825	1.89626	15	8923	36	42264	155	wgEncodeOpenChromDnaseOsteoblAlnAllReps.30000000.twopass.merge150.wgt10.zgt2.wig	Osteobl	bone	hotspots	Hotspots
156	1e-06	4.2559e-07	0.995626	-14.6698	2675.73	-5259.1	5229.76	0	8923	3	42264	155	wgEncodeOpenChromDnaseOsteoblAlnAllReps.30000000.twopass.merge150.wgt10.zgt2.wig	Osteobl	bone	hotspots	Hotspots
156	1e-08	1.24027e-06	0.995711	-13.6002	2529.96	-4972.32	4945.12	0	8923	2	42264	155	wgEncodeOpenChromDnaseOsteoblAlnAllReps.30000000.twopass.merge150.wgt10.zgt2.wig	Osteobl	bone	hotspots	Hotspots
156	1e-10	1	1	-1.50403e-14	5145.21	-10084.6	10084.6	0	8923	0	42264	155	wgEncodeOpenChromDnaseOsteoblAlnAllReps.30000000.twopass.merge150.wgt10.zgt2.wig	Osteobl	bone	hotspots	Hotspots
156	1e-12	1	1	-1.50403e-14	5145.21	-10084.6	10084.6	0	8923	0	42264	155	wgEncodeOpenChromDnaseOsteoblAlnAllReps.30000000.twopass.merge150.wgt10.zgt2.wig	Osteobl	bone	hotspots	Hotspots
156	1e-14	1	1	-1.50403e-14	5145.21	-10084.6	10084.6	0	8923	0	42264	155	wgEncodeOpenChromDnaseOsteoblAlnAllReps.30000000.twopass.merge150.wgt10.zgt2.wig	Osteobl	bone	hotspots	Hotspots
156	1e-16	1	1	-1.50403e-14	5145.21	-10084.6	10084.6	0	8923	0	42264	155	wgEncodeOpenChromDnaseOsteoblAlnAllReps.30000000.twopass.merge150.wgt10.zgt2.wig	Osteobl	bone	hotspots	Hotspots
156	1e-18	1	1	-1.50403e-14	5145.21	-10084.6	10084.6	0	8923	0	42264	155	wgEncodeOpenChromDnaseOsteoblAlnAllReps.30000000.twopass.merge150.wgt10.zgt2.wig	Osteobl	bone	hotspots	Hotspots
156	1e-20	1	1	-1.50403e-14	5145.21	-10084.6	10084.6	0	8923	0	42264	155	wgEncodeOpenChromDnaseOsteoblAlnAllReps.30000000.twopass.merge150.wgt10.zgt2.wig	Osteobl	bone	hotspots	Hotspots
157	0.01	1.35421	0.00516257	0.30322	0.10842	0.0907162	0.515723	177	8106	750	42264	156	wgEncodeOpenChromDnasePanisdAlnAllReps.30000000.twopass.merge150.wgt10.zgt2.wig	PanIsletD	pancreas	hotspots	Hotspots
157	0.0001	1.13383	0.799374	0.125601	0.494188	-0.843006	1.09421	9	8106	36	42264	156	wgEncodeOpenChromDnasePanisdAlnAllReps.30000000.twopass.merge150.wgt10.zgt2.wig	PanIsletD	pancreas	hotspots	Hotspots
157	1e-06	5.16338e-07	0.995876	-14.4765	2800.5	-5503.46	5474.51	0	8106	3	42264	156	wgEncodeOpenChromDnasePanisdAlnAllReps.30000000.twopass.merge150.wgt10.zgt2.wig	PanIsletD	pancreas	hotspots	Hotspots
157	1e-08	1.05513e-06	0.995888	-13.7618	2670.24	-5247.43	5219.9	0	8106	2	42264	156	wgEncodeOpenChromDnasePanisdAlnAllReps.30000000.twopass.merge150.wgt10.zgt2.wig	PanIsletD	pancreas	hotspots	Hotspots
157	1e-10	1	1	-3.96933e-18	5434.16	-10651	10651	0	8106	0	42264	156	wgEncodeOpenChromDnasePanisdAlnAllReps.30000000.twopass.merge150.wgt10.zgt2.wig	PanIsletD	pancreas	hotspots	Hotspots
157	1e-12	1	1	-3.96933e-18	5434.16	-10651	10651	0	8106	0	42264	156	wgEncodeOpenChromDnasePanisdAlnAllReps.30000000.twopass.merge150.wgt10.zgt2.wig	PanIsletD	pancreas	hotspots	Hotspots
157	1e-14	1	1	-3.96933e-18	5434.16	-10651	10651	0	8106	0	42264	156	wgEncodeOpenChromDnasePanisdAlnAllReps.30000000.twopass.merge150.wgt10.zgt2.wig	PanIsletD	pancreas	hotspots	Hotspots
157	1e-16	1	1	-3.96933e-18	5434.16	-10651	10651	0	8106	0	42264	156	wgEncodeOpenChromDnasePanisdAlnAllReps.30000000.twopass.merge150.wgt10.zgt2.wig	PanIsletD	pancreas	hotspots	Hotspots
157	1e-18	1	1	-3.96933e-18	5434.16	-10651	10651	0	8106	0	42264	156	wgEncodeOpenChromDnasePanisdAlnAllReps.30000000.twopass.merge150.wgt10.zgt2.wig	PanIsletD	pancreas	hotspots	Hotspots
157	1e-20	1	1	-3.96933e-18	5434.16	-10651	10651	0	8106	0	42264	156	wgEncodeOpenChromDnasePanisdAlnAllReps.30000000.twopass.merge150.wgt10.zgt2.wig	PanIsletD	pancreas	hotspots	Hotspots
158	0.01	1.11758	0.315197	0.11117	0.110685	-0.105773	0.328112	156	7662	750	42264	157	wgEncodeOpenChromDnasePanisletsAlnAllReps.30000000.twopass.merge150.wgt10.zgt2.wig	PanIslets	pancreas	hotspots	Hotspots
158	0.0001	1.55488	0.340651	0.441398	0.463225	-0.466524	1.34932	10	7662	36	42264	157	wgEncodeOpenChromDnasePanisletsAlnAllReps.30000000.twopass.merge150.wgt10.zgt2.wig	PanIslets	pancreas	hotspots	Hotspots
158	1e-06	6.66189e-07	0.996019	-14.2217	2850.19	-5600.59	5572.15	0	7662	3	42264	157	wgEncodeOpenChromDnasePanisletsAlnAllReps.30000000.twopass.merge150.wgt10.zgt2.wig	PanIslets	pancreas	hotspots	Hotspots
158	1e-08	1.60029e-06	0.996074	-13.3453	2712.27	-5329.39	5302.7	0	7662	2	42264	157	wgEncodeOpenChromDnasePanisletsAlnAllReps.30000000.twopass.merge150.wgt10.zgt2.wig	PanIslets	pancreas	hotspots	Hotspots
158	1e-10	1	1	-1.09275e-17	5381.04	-10546.8	10546.8	0	7662	0	42264	157	wgEncodeOpenChromDnasePanisletsAlnAllReps.30000000.twopass.merge150.wgt10.zgt2.wig	PanIslets	pancreas	hotspots	Hotspots
158	1e-12	1	1	-1.09275e-17	5381.04	-10546.8	10546.8	0	7662	0	42264	157	wgEncodeOpenChromDnasePanisletsAlnAllReps.30000000.twopass.merge150.wgt10.zgt2.wig	PanIslets	pancreas	hotspots	Hotspots
158	1e-14	1	1	-1.09275e-17	5381.04	-10546.8	10546.8	0	7662	0	42264	157	wgEncodeOpenChromDnasePanisletsAlnAllReps.30000000.twopass.merge150.wgt10.zgt2.wig	PanIslets	pancreas	hotspots	Hotspots
158	1e-16	1	1	-1.09275e-17	5381.04	-10546.8	10546.8	0	7662	0	42264	157	wgEncodeOpenChromDnasePanisletsAlnAllReps.30000000.twopass.merge150.wgt10.zgt2.wig	PanIslets	pancreas	hotspots	Hotspots
158	1e-18	1	1	-1.09275e-17	5381.04	-10546.8	10546.8	0	7662	0	42264	157	wgEncodeOpenChromDnasePanisletsAlnAllReps.30000000.twopass.merge150.wgt10.zgt2.wig	PanIslets	pancreas	hotspots	Hotspots
158	1e-20	1	1	-1.09275e-17	5381.04	-10546.8	10546.8	0	7662	0	42264	157	wgEncodeOpenChromDnasePanisletsAlnAllReps.30000000.twopass.merge150.wgt10.zgt2.wig	PanIslets	pancreas	hotspots	Hotspots
159	0.01	1.01452	0.897146	0.0144199	0.11155	-0.204219	0.233058	162	8379	750	42264	158	wgEncodeOpenChromDnasePhteAlnAllReps.30000000.twopass.merge150.wgt10.zgt2.wig	pHTE	epithelium	hotspots	Hotspots
159	0.0001	2.03347	0.122354	0.709743	0.45939	-0.190661	1.61015	13	8379	36	42264	158	wgEncodeOpenChromDnasePhteAlnAllReps.30000000.twopass.merge150.wgt10.zgt2.wig	pHTE	epithelium	hotspots	Hotspots
159	1e-06	6.38104e-07	0.995835	-14.2648	2732.72	-5370.39	5341.86	0	8379	3	42264	158	wgEncodeOpenChromDnasePhteAlnAllReps.30000000.twopass.merge150.wgt10.zgt2.wig	pHTE	epithelium	hotspots	Hotspots
159	1e-08	1.40254e-06	0.995867	-13.4772	2602.04	-5113.48	5086.52	0	8379	2	42264	158	wgEncodeOpenChromDnasePhteAlnAllReps.30000000.twopass.merge150.wgt10.zgt2.wig	pHTE	epithelium	hotspots	Hotspots
159	1e-10	1	1	-4.15373e-18	5317.38	-10422.1	10422.1	0	8379	0	42264	158	wgEncodeOpenChromDnasePhteAlnAllReps.30000000.twopass.merge150.wgt10.zgt2.wig	pHTE	epithelium	hotspots	Hotspots
159	1e-12	1	1	-4.15373e-18	5317.38	-10422.1	10422.1	0	8379	0	42264	158	wgEncodeOpenChromDnasePhteAlnAllReps.30000000.twopass.merge150.wgt10.zgt2.wig	pHTE	epithelium	hotspots	Hotspots
159	1e-14	1	1	-4.15373e-18	5317.38	-10422.1	10422.1	0	8379	0	42264	158	wgEncodeOpenChromDnasePhteAlnAllReps.30000000.twopass.merge150.wgt10.zgt2.wig	pHTE	epithelium	hotspots	Hotspots
159	1e-16	1	1	-4.15373e-18	5317.38	-10422.1	10422.1	0	8379	0	42264	158	wgEncodeOpenChromDnasePhteAlnAllReps.30000000.twopass.merge150.wgt10.zgt2.wig	pHTE	epithelium	hotspots	Hotspots
159	1e-18	1	1	-4.15373e-18	5317.38	-10422.1	10422.1	0	8379	0	42264	158	wgEncodeOpenChromDnasePhteAlnAllReps.30000000.twopass.merge150.wgt10.zgt2.wig	pHTE	epithelium	hotspots	Hotspots
159	1e-20	1	1	-4.15373e-18	5317.38	-10422.1	10422.1	0	8379	0	42264	158	wgEncodeOpenChromDnasePhteAlnAllReps.30000000.twopass.merge150.wgt10.zgt2.wig	pHTE	epithelium	hotspots	Hotspots
160	0.01	1.22561	0.0617754	0.203438	0.108912	-0.0100303	0.416907	164	7871	750	42264	159	wgEncodeOpenChromDnaseProgfibAlnAllReps.30000000.twopass.merge150.wgt10.zgt2.wig	ProgFib	skin	hotspots	Hotspots
160	0.0001	2.23904	0.0756596	0.806048	0.453742	-0.0832866	1.69538	12	7871	36	42264	159	wgEncodeOpenChromDnaseProgfibAlnAllReps.30000000.twopass.merge150.wgt10.zgt2.wig	ProgFib	skin	hotspots	Hotspots
160	1e-06	5.2831e-07	0.995931	-14.4536	2834.04	-5569.17	5540.26	0	7871	3	42264	159	wgEncodeOpenChromDnaseProgfibAlnAllReps.30000000.twopass.merge150.wgt10.zgt2.wig	ProgFib	skin	hotspots	Hotspots
160	1e-08	1.78364e-06	0.996055	-13.2369	2677.2	-5260.54	5234.07	0	7871	2	42264	159	wgEncodeOpenChromDnaseProgfibAlnAllReps.30000000.twopass.merge150.wgt10.zgt2.wig	ProgFib	skin	hotspots	Hotspots
160	1e-10	1	1	2.09166e-18	5373.92	-10532.9	10532.9	0	7871	0	42264	159	wgEncodeOpenChromDnaseProgfibAlnAllReps.30000000.twopass.merge150.wgt10.zgt2.wig	ProgFib	skin	hotspots	Hotspots
160	1e-12	1	1	2.09166e-18	5373.92	-10532.9	10532.9	0	7871	0	42264	159	wgEncodeOpenChromDnaseProgfibAlnAllReps.30000000.twopass.merge150.wgt10.zgt2.wig	ProgFib	skin	hotspots	Hotspots
160	1e-14	1	1	2.09166e-18	5373.92	-10532.9	10532.9	0	7871	0	42264	159	wgEncodeOpenChromDnaseProgfibAlnAllReps.30000000.twopass.merge150.wgt10.zgt2.wig	ProgFib	skin	hotspots	Hotspots
160	1e-16	1	1	2.09166e-18	5373.92	-10532.9	10532.9	0	7871	0	42264	159	wgEncodeOpenChromDnaseProgfibAlnAllReps.30000000.twopass.merge150.wgt10.zgt2.wig	ProgFib	skin	hotspots	Hotspots
160	1e-18	1	1	2.09166e-18	5373.92	-10532.9	10532.9	0	7871	0	42264	159	wgEncodeOpenChromDnaseProgfibAlnAllReps.30000000.twopass.merge150.wgt10.zgt2.wig	ProgFib	skin	hotspots	Hotspots
160	1e-20	1	1	2.09166e-18	5373.92	-10532.9	10532.9	0	7871	0	42264	159	wgEncodeOpenChromDnaseProgfibAlnAllReps.30000000.twopass.merge150.wgt10.zgt2.wig	ProgFib	skin	hotspots	Hotspots
161	0.01	1.31611	0.0141842	0.27468	0.111997	0.0551658	0.494194	145	6550	750	42264	160	wgEncodeOpenChromDnaseStellateAlnAllReps.30000000.twopass.merge150.wgt10.zgt2.wig	Stellate	liver	hotspots	Hotspots
161	0.0001	1.48378	0.405834	0.394596	0.474703	-0.535822	1.32501	9	6550	36	42264	160	wgEncodeOpenChromDnaseStellateAlnAllReps.30000000.twopass.merge150.wgt10.zgt2.wig	Stellate	liver	hotspots	Hotspots
161	1e-06	4.567e-07	0.996211	-14.5992	3074.5	-6040.61	6011.41	0	6550	3	42264	160	wgEncodeOpenChromDnaseStellateAlnAllReps.30000000.twopass.merge150.wgt10.zgt2.wig	Stellate	liver	hotspots	Hotspots
161	1e-08	1.19796e-06	0.996263	-13.6349	2911.32	-5719.82	5692.55	0	6550	2	42264	160	wgEncodeOpenChromDnaseStellateAlnAllReps.30000000.twopass.merge150.wgt10.zgt2.wig	Stellate	liver	hotspots	Hotspots
161	1e-10	1	1	5.3803e-19	5648.19	-11070.5	11070.5	0	6550	0	42264	160	wgEncodeOpenChromDnaseStellateAlnAllReps.30000000.twopass.merge150.wgt10.zgt2.wig	Stellate	liver	hotspots	Hotspots
161	1e-12	1	1	5.3803e-19	5648.19	-11070.5	11070.5	0	6550	0	42264	160	wgEncodeOpenChromDnaseStellateAlnAllReps.30000000.twopass.merge150.wgt10.zgt2.wig	Stellate	liver	hotspots	Hotspots
161	1e-14	1	1	5.3803e-19	5648.19	-11070.5	11070.5	0	6550	0	42264	160	wgEncodeOpenChromDnaseStellateAlnAllReps.30000000.twopass.merge150.wgt10.zgt2.wig	Stellate	liver	hotspots	Hotspots
161	1e-16	1	1	5.3803e-19	5648.19	-11070.5	11070.5	0	6550	0	42264	160	wgEncodeOpenChromDnaseStellateAlnAllReps.30000000.twopass.merge150.wgt10.zgt2.wig	Stellate	liver	hotspots	Hotspots
161	1e-18	1	1	5.3803e-19	5648.19	-11070.5	11070.5	0	6550	0	42264	160	wgEncodeOpenChromDnaseStellateAlnAllReps.30000000.twopass.merge150.wgt10.zgt2.wig	Stellate	liver	hotspots	Hotspots
161	1e-20	1	1	5.3803e-19	5648.19	-11070.5	11070.5	0	6550	0	42264	160	wgEncodeOpenChromDnaseStellateAlnAllReps.30000000.twopass.merge150.wgt10.zgt2.wig	Stellate	liver	hotspots	Hotspots
162	0.01	1.14962	0.232122	0.139429	0.116685	-0.0892748	0.368132	135	6655	750	42264	161	wgEncodeOpenChromDnaseT47dAlnAllReps.30000000.twopass.merge150.wgt10.zgt2.wig	T-47D	breast	hotspots	Hotspots
162	0.0001	1.92716	0.164341	0.656047	0.471766	-0.268615	1.58071	10	6655	36	42264	161	wgEncodeOpenChromDnaseT47dAlnAllReps.30000000.twopass.merge150.wgt10.zgt2.wig	T-47D	breast	hotspots	Hotspots
162	1e-06	5.92516e-07	0.996268	-14.3389	3065.23	-6022.18	5993.51	0	6655	3	42264	161	wgEncodeOpenChromDnaseT47dAlnAllReps.30000000.twopass.merge150.wgt10.zgt2.wig	T-47D	breast	hotspots	Hotspots
162	1e-08	1.19015e-06	0.996274	-13.6414	2920.86	-5738.53	5711.24	0	6655	2	42264	161	wgEncodeOpenChromDnaseT47dAlnAllReps.30000000.twopass.merge150.wgt10.zgt2.wig	T-47D	breast	hotspots	Hotspots
162	1e-10	1	1	2.04746e-17	5740.61	-11251.6	11251.6	0	6655	0	42264	161	wgEncodeOpenChromDnaseT47dAlnAllReps.30000000.twopass.merge150.wgt10.zgt2.wig	T-47D	breast	hotspots	Hotspots
162	1e-12	1	1	2.04746e-17	5740.61	-11251.6	11251.6	0	6655	0	42264	161	wgEncodeOpenChromDnaseT47dAlnAllReps.30000000.twopass.merge150.wgt10.zgt2.wig	T-47D	breast	hotspots	Hotspots
162	1e-14	1	1	2.04746e-17	5740.61	-11251.6	11251.6	0	6655	0	42264	161	wgEncodeOpenChromDnaseT47dAlnAllReps.30000000.twopass.merge150.wgt10.zgt2.wig	T-47D	breast	hotspots	Hotspots
162	1e-16	1	1	2.04746e-17	5740.61	-11251.6	11251.6	0	6655	0	42264	161	wgEncodeOpenChromDnaseT47dAlnAllReps.30000000.twopass.merge150.wgt10.zgt2.wig	T-47D	breast	hotspots	Hotspots
162	1e-18	1	1	2.04746e-17	5740.61	-11251.6	11251.6	0	6655	0	42264	161	wgEncodeOpenChromDnaseT47dAlnAllReps.30000000.twopass.merge150.wgt10.zgt2.wig	T-47D	breast	hotspots	Hotspots
162	1e-20	1	1	2.04746e-17	5740.61	-11251.6	11251.6	0	6655	0	42264	161	wgEncodeOpenChromDnaseT47dAlnAllReps.30000000.twopass.merge150.wgt10.zgt2.wig	T-47D	breast	hotspots	Hotspots
163	0.01	1.19334	0.123391	0.176755	0.114724	-0.0481043	0.401614	138	6703	750	42264	162	wgEncodeOpenChromDnaseUrotsaAlnAllReps.30000000.twopass.merge150.wgt10.zgt2.wig	Urothelia	urothelium	hotspots	Hotspots
163	0.0001	1.20646	0.703014	0.187693	0.492304	-0.777223	1.15261	8	6703	36	42264	162	wgEncodeOpenChromDnaseUrotsaAlnAllReps.30000000.twopass.merge150.wgt10.zgt2.wig	Urothelia	urothelium	hotspots	Hotspots
163	1e-06	5.24272e-07	0.996229	-14.4613	3059.84	-6011.75	5982.83	0	6703	3	42264	162	wgEncodeOpenChromDnaseUrotsaAlnAllReps.30000000.twopass.merge150.wgt10.zgt2.wig	Urothelia	urothelium	hotspots	Hotspots
163	1e-08	1.3955e-06	0.996296	-13.4823	2904.47	-5706.24	5679.28	0	6703	2	42264	162	wgEncodeOpenChromDnaseUrotsaAlnAllReps.30000000.twopass.merge150.wgt10.zgt2.wig	Urothelia	urothelium	hotspots	Hotspots
163	1e-10	1	1	8.26022e-19	5677.21	-11127.3	11127.3	0	6703	0	42264	162	wgEncodeOpenChromDnaseUrotsaAlnAllReps.30000000.twopass.merge150.wgt10.zgt2.wig	Urothelia	urothelium	hotspots	Hotspots
163	1e-12	1	1	8.26022e-19	5677.21	-11127.3	11127.3	0	6703	0	42264	162	wgEncodeOpenChromDnaseUrotsaAlnAllReps.30000000.twopass.merge150.wgt10.zgt2.wig	Urothelia	urothelium	hotspots	Hotspots
163	1e-14	1	1	8.26022e-19	5677.21	-11127.3	11127.3	0	6703	0	42264	162	wgEncodeOpenChromDnaseUrotsaAlnAllReps.30000000.twopass.merge150.wgt10.zgt2.wig	Urothelia	urothelium	hotspots	Hotspots
163	1e-16	1	1	8.26022e-19	5677.21	-11127.3	11127.3	0	6703	0	42264	162	wgEncodeOpenChromDnaseUrotsaAlnAllReps.30000000.twopass.merge150.wgt10.zgt2.wig	Urothelia	urothelium	hotspots	Hotspots
163	1e-18	1	1	8.26022e-19	5677.21	-11127.3	11127.3	0	6703	0	42264	162	wgEncodeOpenChromDnaseUrotsaAlnAllReps.30000000.twopass.merge150.wgt10.zgt2.wig	Urothelia	urothelium	hotspots	Hotspots
163	1e-20	1	1	8.26022e-19	5677.21	-11127.3	11127.3	0	6703	0	42264	162	wgEncodeOpenChromDnaseUrotsaAlnAllReps.30000000.twopass.merge150.wgt10.zgt2.wig	Urothelia	urothelium	hotspots	Hotspots
164	0.01	1.25878	0.0389036	0.230145	0.111439	0.011724	0.448567	156	7210	750	42264	163	wgEncodeOpenChromDnaseUrotsaUt189AlnAllReps.30000000.twopass.merge150.wgt10.zgt2.wig	Urothelia	urothelium	hotspots	Hotspots
164	0.0001	1.39915	0.484623	0.335866	0.480573	-0.606057	1.27779	10	7210	36	42264	163	wgEncodeOpenChromDnaseUrotsaUt189AlnAllReps.30000000.twopass.merge150.wgt10.zgt2.wig	Urothelia	urothelium	hotspots	Hotspots
164	1e-06	4.79865e-07	0.996089	-14.5498	2968.61	-5833.03	5803.93	0	7210	3	42264	163	wgEncodeOpenChromDnaseUrotsaUt189AlnAllReps.30000000.twopass.merge150.wgt10.zgt2.wig	Urothelia	urothelium	hotspots	Hotspots
164	1e-08	1.2798e-06	0.996156	-13.5688	2816.69	-5534.28	5507.15	0	7210	2	42264	163	wgEncodeOpenChromDnaseUrotsaUt189AlnAllReps.30000000.twopass.merge150.wgt10.zgt2.wig	Urothelia	urothelium	hotspots	Hotspots
164	1e-10	1	1	-8.79524e-18	5559.52	-10896.7	10896.7	0	7210	0	42264	163	wgEncodeOpenChromDnaseUrotsaUt189AlnAllReps.30000000.twopass.merge150.wgt10.zgt2.wig	Urothelia	urothelium	hotspots	Hotspots
164	1e-12	1	1	-8.79524e-18	5559.52	-10896.7	10896.7	0	7210	0	42264	163	wgEncodeOpenChromDnaseUrotsaUt189AlnAllReps.30000000.twopass.merge150.wgt10.zgt2.wig	Urothelia	urothelium	hotspots	Hotspots
164	1e-14	1	1	-8.79524e-18	5559.52	-10896.7	10896.7	0	7210	0	42264	163	wgEncodeOpenChromDnaseUrotsaUt189AlnAllReps.30000000.twopass.merge150.wgt10.zgt2.wig	Urothelia	urothelium	hotspots	Hotspots
164	1e-16	1	1	-8.79524e-18	5559.52	-10896.7	10896.7	0	7210	0	42264	163	wgEncodeOpenChromDnaseUrotsaUt189AlnAllReps.30000000.twopass.merge150.wgt10.zgt2.wig	Urothelia	urothelium	hotspots	Hotspots
164	1e-18	1	1	-8.79524e-18	5559.52	-10896.7	10896.7	0	7210	0	42264	163	wgEncodeOpenChromDnaseUrotsaUt189AlnAllReps.30000000.twopass.merge150.wgt10.zgt2.wig	Urothelia	urothelium	hotspots	Hotspots
164	1e-20	1	1	-8.79524e-18	5559.52	-10896.7	10896.7	0	7210	0	42264	163	wgEncodeOpenChromDnaseUrotsaUt189AlnAllReps.30000000.twopass.merge150.wgt10.zgt2.wig	Urothelia	urothelium	hotspots	Hotspots
165	0.01	1.20026	0.136311	0.182542	0.122539	-0.0576336	0.422717	111	5422	750	42264	164	WI_38-DS14315.twopass.merge150.wgt10.zgt2.wig	WI-38	embryonic_lung	hotspots	Hotspots
165	0.0001	1.58703	0.351955	0.461865	0.4962	-0.510687	1.43442	8	5422	36	42264	164	WI_38-DS14315.twopass.merge150.wgt10.zgt2.wig	WI-38	embryonic_lung	hotspots	Hotspots
165	1e-06	5.77532e-07	0.996602	-14.3645	3372.6	-6624.65	6595.92	0	5422	3	42264	164	WI_38-DS14315.twopass.merge150.wgt10.zgt2.wig	WI-38	embryonic_lung	hotspots	Hotspots
165	1e-08	1.1356e-06	0.996608	-13.6883	3219.72	-6324.35	6296.97	0	5422	2	42264	164	WI_38-DS14315.twopass.merge150.wgt10.zgt2.wig	WI-38	embryonic_lung	hotspots	Hotspots
165	1e-10	1	1	1.96219e-17	6133.83	-12022.3	12022.3	0	5422	0	42264	164	WI_38-DS14315.twopass.merge150.wgt10.zgt2.wig	WI-38	embryonic_lung	hotspots	Hotspots
165	1e-12	1	1	1.96219e-17	6133.83	-12022.3	12022.3	0	5422	0	42264	164	WI_38-DS14315.twopass.merge150.wgt10.zgt2.wig	WI-38	embryonic_lung	hotspots	Hotspots
165	1e-14	1	1	1.96219e-17	6133.83	-12022.3	12022.3	0	5422	0	42264	164	WI_38-DS14315.twopass.merge150.wgt10.zgt2.wig	WI-38	embryonic_lung	hotspots	Hotspots
165	1e-16	1	1	1.96219e-17	6133.83	-12022.3	12022.3	0	5422	0	42264	164	WI_38-DS14315.twopass.merge150.wgt10.zgt2.wig	WI-38	embryonic_lung	hotspots	Hotspots
165	1e-18	1	1	1.96219e-17	6133.83	-12022.3	12022.3	0	5422	0	42264	164	WI_38-DS14315.twopass.merge150.wgt10.zgt2.wig	WI-38	embryonic_lung	hotspots	Hotspots
165	1e-20	1	1	1.96219e-17	6133.83	-12022.3	12022.3	0	5422	0	42264	164	WI_38-DS14315.twopass.merge150.wgt10.zgt2.wig	WI-38	embryonic_lung	hotspots	Hotspots
166	0.01	1.1599	0.187	0.148332	0.112415	-0.0720013	0.368666	137	7004	750	42264	165	WI_38_TAM-DS14323.twopass.merge150.wgt10.zgt2.wig	WI-38	embryonic_lung	hotspots	Hotspots
166	0.0001	2.6547	0.0300276	0.976331	0.449979	0.0943726	1.85829	12	7004	36	42264	165	WI_38_TAM-DS14323.twopass.merge150.wgt10.zgt2.wig	WI-38	embryonic_lung	hotspots	Hotspots
166	1e-06	3.79501e-07	0.996091	-14.7844	3017.32	-5928.74	5899.17	0	7004	3	42264	165	WI_38_TAM-DS14323.twopass.merge150.wgt10.zgt2.wig	WI-38	embryonic_lung	hotspots	Hotspots
166	1e-08	7.50742e-07	0.996087	-14.1022	2875.63	-5650.34	5622.13	0	7004	2	42264	165	WI_38_TAM-DS14323.twopass.merge150.wgt10.zgt2.wig	WI-38	embryonic_lung	hotspots	Hotspots
166	1e-10	1	1	1.61206e-17	5528.79	-10836.4	10836.4	0	7004	0	42264	165	WI_38_TAM-DS14323.twopass.merge150.wgt10.zgt2.wig	WI-38	embryonic_lung	hotspots	Hotspots
166	1e-12	1	1	1.61206e-17	5528.79	-10836.4	10836.4	0	7004	0	42264	165	WI_38_TAM-DS14323.twopass.merge150.wgt10.zgt2.wig	WI-38	embryonic_lung	hotspots	Hotspots
166	1e-14	1	1	1.61206e-17	5528.79	-10836.4	10836.4	0	7004	0	42264	165	WI_38_TAM-DS14323.twopass.merge150.wgt10.zgt2.wig	WI-38	embryonic_lung	hotspots	Hotspots
166	1e-16	1	1	1.61206e-17	5528.79	-10836.4	10836.4	0	7004	0	42264	165	WI_38_TAM-DS14323.twopass.merge150.wgt10.zgt2.wig	WI-38	embryonic_lung	hotspots	Hotspots
166	1e-18	1	1	1.61206e-17	5528.79	-10836.4	10836.4	0	7004	0	42264	165	WI_38_TAM-DS14323.twopass.merge150.wgt10.zgt2.wig	WI-38	embryonic_lung	hotspots	Hotspots
166	1e-20	1	1	1.61206e-17	5528.79	-10836.4	10836.4	0	7004	0	42264	165	WI_38_TAM-DS14323.twopass.merge150.wgt10.zgt2.wig	WI-38	embryonic_lung	hotspots	Hotspots
167	0.01	1.5406	0.00548902	0.432171	0.155634	0.127128	0.737213	60	2381	750	42264	166	A549-all.fdr0.01.bed	A549	epithelium	peaks	Peaks
167	0.0001	1.97675	0.231429	0.681453	0.569451	-0.43467	1.79758	5	2381	36	42264	166	A549-all.fdr0.01.bed	A549	epithelium	peaks	Peaks
167	1e-06	1.4639e-06	0.997833	-13.4344	4945.9	-9707.4	9680.53	0	2381	3	42264	166	A549-all.fdr0.01.bed	A549	epithelium	peaks	Peaks
167	1e-08	2.29997e-06	0.997826	-12.9826	4765.84	-9354.04	9328.07	0	2381	2	42264	166	A549-all.fdr0.01.bed	A549	epithelium	peaks	Peaks
167	1e-10	1	1	-1.55453e-16	8640.5	-16935.4	16935.4	0	2381	0	42264	166	A549-all.fdr0.01.bed	A549	epithelium	peaks	Peaks
167	1e-12	1	1	-1.55453e-16	8640.5	-16935.4	16935.4	0	2381	0	42264	166	A549-all.fdr0.01.bed	A549	epithelium	peaks	Peaks
167	1e-14	1	1	-1.55453e-16	8640.5	-16935.4	16935.4	0	2381	0	42264	166	A549-all.fdr0.01.bed	A549	epithelium	peaks	Peaks
167	1e-16	1	1	-1.55453e-16	8640.5	-16935.4	16935.4	0	2381	0	42264	166	A549-all.fdr0.01.bed	A549	epithelium	peaks	Peaks
167	1e-18	1	1	-1.55453e-16	8640.5	-16935.4	16935.4	0	2381	0	42264	166	A549-all.fdr0.01.bed	A549	epithelium	peaks	Peaks
167	1e-20	1	1	-1.55453e-16	8640.5	-16935.4	16935.4	0	2381	0	42264	166	A549-all.fdr0.01.bed	A549	epithelium	peaks	Peaks
168	0.01	1.4464	0.0145946	0.36908	0.151121	0.0728833	0.665277	64	2601	750	42264	167	Adult_Th0_AllReps.30000000.hotspot.twopass.fdr0.01.merge.pks.bed	Adult_CD4+	blood	peaks	Peaks
168	0.0001	2.35104	0.112233	0.854859	0.538245	-0.200101	1.90982	6	2601	36	42264	167	Adult_Th0_AllReps.30000000.hotspot.twopass.fdr0.01.merge.pks.bed	Adult_CD4+	blood	peaks	Peaks
168	1e-06	1.44419e-06	0.99773	-13.448	4726.92	-9278.22	9251.32	0	2601	3	42264	167	Adult_Th0_AllReps.30000000.hotspot.twopass.fdr0.01.merge.pks.bed	Adult_CD4+	blood	peaks	Peaks
168	1e-08	0.653874	0.999944	-0.424841	6025.08	-11809.6	11808.7	0	2601	2	42264	167	Adult_Th0_AllReps.30000000.hotspot.twopass.fdr0.01.merge.pks.bed	Adult_CD4+	blood	peaks	Peaks
168	1e-10	1	1	-1.57627e-16	8195.08	-16062.4	16062.4	0	2601	0	42264	167	Adult_Th0_AllReps.30000000.hotspot.twopass.fdr0.01.merge.pks.bed	Adult_CD4+	blood	peaks	Peaks
168	1e-12	1	1	-1.57627e-16	8195.08	-16062.4	16062.4	0	2601	0	42264	167	Adult_Th0_AllReps.30000000.hotspot.twopass.fdr0.01.merge.pks.bed	Adult_CD4+	blood	peaks	Peaks
168	1e-14	1	1	-1.57627e-16	8195.08	-16062.4	16062.4	0	2601	0	42264	167	Adult_Th0_AllReps.30000000.hotspot.twopass.fdr0.01.merge.pks.bed	Adult_CD4+	blood	peaks	Peaks
168	1e-16	1	1	-1.57627e-16	8195.08	-16062.4	16062.4	0	2601	0	42264	167	Adult_Th0_AllReps.30000000.hotspot.twopass.fdr0.01.merge.pks.bed	Adult_CD4+	blood	peaks	Peaks
168	1e-18	1	1	-1.57627e-16	8195.08	-16062.4	16062.4	0	2601	0	42264	167	Adult_Th0_AllReps.30000000.hotspot.twopass.fdr0.01.merge.pks.bed	Adult_CD4+	blood	peaks	Peaks
168	1e-20	1	1	-1.57627e-16	8195.08	-16062.4	16062.4	0	2601	0	42264	167	Adult_Th0_AllReps.30000000.hotspot.twopass.fdr0.01.merge.pks.bed	Adult_CD4+	blood	peaks	Peaks
169	0.01	1.49536	0.0103333	0.402366	0.1569	0.0948418	0.709891	57	2432	750	42264	168	AG04449-DS12319.hotspot.twopass.fdr0.01.merge.pks.bed	AG04449	skin	peaks	Peaks
169	0.0001	2.05839	0.206763	0.721924	0.571814	-0.398831	1.84268	6	2432	36	42264	168	AG04449-DS12319.hotspot.twopass.fdr0.01.merge.pks.bed	AG04449	skin	peaks	Peaks
169	1e-06	1.36882e-06	0.997818	-13.5016	4937.43	-9690.86	9663.86	0	2432	3	42264	168	AG04449-DS12319.hotspot.twopass.fdr0.01.merge.pks.bed	AG04449	skin	peaks	Peaks
169	1e-08	1.71669e-06	0.99778	-13.2751	4771.72	-9365.85	9339.3	0	2432	2	42264	168	AG04449-DS12319.hotspot.twopass.fdr0.01.merge.pks.bed	AG04449	skin	peaks	Peaks
169	1e-10	1	1	-1.14281e-16	8637.23	-16929	16929	0	2432	0	42264	168	AG04449-DS12319.hotspot.twopass.fdr0.01.merge.pks.bed	AG04449	skin	peaks	Peaks
169	1e-12	1	1	-1.14281e-16	8637.23	-16929	16929	0	2432	0	42264	168	AG04449-DS12319.hotspot.twopass.fdr0.01.merge.pks.bed	AG04449	skin	peaks	Peaks
169	1e-14	1	1	-1.14281e-16	8637.23	-16929	16929	0	2432	0	42264	168	AG04449-DS12319.hotspot.twopass.fdr0.01.merge.pks.bed	AG04449	skin	peaks	Peaks
169	1e-16	1	1	-1.14281e-16	8637.23	-16929	16929	0	2432	0	42264	168	AG04449-DS12319.hotspot.twopass.fdr0.01.merge.pks.bed	AG04449	skin	peaks	Peaks
169	1e-18	1	1	-1.14281e-16	8637.23	-16929	16929	0	2432	0	42264	168	AG04449-DS12319.hotspot.twopass.fdr0.01.merge.pks.bed	AG04449	skin	peaks	Peaks
169	1e-20	1	1	-1.14281e-16	8637.23	-16929	16929	0	2432	0	42264	168	AG04449-DS12319.hotspot.twopass.fdr0.01.merge.pks.bed	AG04449	skin	peaks	Peaks
170	0.01	1.4257	0.0305533	0.35466	0.163979	0.0332619	0.676059	50	2235	750	42264	169	AG04450-DS12270.hotspot.twopass.fdr0.01.merge.pks.bed	AG04450	lung	peaks	Peaks
170	0.0001	2.25445	0.156891	0.812905	0.574246	-0.312617	1.93843	5	2235	36	42264	169	AG04450-DS12270.hotspot.twopass.fdr0.01.merge.pks.bed	AG04450	lung	peaks	Peaks
170	1e-06	1.43502e-06	0.997929	-13.4543	5184.35	-10174.8	10147.9	0	2235	3	42264	169	AG04450-DS12270.hotspot.twopass.fdr0.01.merge.pks.bed	AG04450	lung	peaks	Peaks
170	1e-08	3.18278e-06	0.997967	-12.6578	4967.66	-9749.27	9723.96	0	2235	2	42264	169	AG04450-DS12270.hotspot.twopass.fdr0.01.merge.pks.bed	AG04450	lung	peaks	Peaks
170	1e-10	1	1	-1.13099e-16	8946.64	-17535.4	17535.4	0	2235	0	42264	169	AG04450-DS12270.hotspot.twopass.fdr0.01.merge.pks.bed	AG04450	lung	peaks	Peaks
170	1e-12	1	1	-1.13099e-16	8946.64	-17535.4	17535.4	0	2235	0	42264	169	AG04450-DS12270.hotspot.twopass.fdr0.01.merge.pks.bed	AG04450	lung	peaks	Peaks
170	1e-14	1	1	-1.13099e-16	8946.64	-17535.4	17535.4	0	2235	0	42264	169	AG04450-DS12270.hotspot.twopass.fdr0.01.merge.pks.bed	AG04450	lung	peaks	Peaks
170	1e-16	1	1	-1.13099e-16	8946.64	-17535.4	17535.4	0	2235	0	42264	169	AG04450-DS12270.hotspot.twopass.fdr0.01.merge.pks.bed	AG04450	lung	peaks	Peaks
170	1e-18	1	1	-1.13099e-16	8946.64	-17535.4	17535.4	0	2235	0	42264	169	AG04450-DS12270.hotspot.twopass.fdr0.01.merge.pks.bed	AG04450	lung	peaks	Peaks
170	1e-20	1	1	-1.13099e-16	8946.64	-17535.4	17535.4	0	2235	0	42264	169	AG04450-DS12270.hotspot.twopass.fdr0.01.merge.pks.bed	AG04450	lung	peaks	Peaks
171	0.01	1.58712	0.00156666	0.461922	0.146084	0.175599	0.748246	72	2874	750	42264	170	AG09309-DS12352.hotspot.twopass.fdr0.01.merge.pks.bed	AG09309	skin	peaks	Peaks
171	0.0001	3.07587	0.0344017	1.12359	0.531165	0.0825067	2.16467	8	2874	36	42264	170	AG09309-DS12352.hotspot.twopass.fdr0.01.merge.pks.bed	AG09309	skin	peaks	Peaks
171	1e-06	9.9669e-07	0.997597	-13.8188	4588.83	-9007.93	8980.29	0	2874	3	42264	170	AG09309-DS12352.hotspot.twopass.fdr0.01.merge.pks.bed	AG09309	skin	peaks	Peaks
171	1e-08	2.02341e-06	0.99762	-13.1107	4395.2	-8627.7	8601.48	0	2874	2	42264	170	AG09309-DS12352.hotspot.twopass.fdr0.01.merge.pks.bed	AG09309	skin	peaks	Peaks
171	1e-10	1	1	-8.83986e-17	8078.39	-15833.6	15833.6	0	2874	0	42264	170	AG09309-DS12352.hotspot.twopass.fdr0.01.merge.pks.bed	AG09309	skin	peaks	Peaks
171	1e-12	1	1	-8.83986e-17	8078.39	-15833.6	15833.6	0	2874	0	42264	170	AG09309-DS12352.hotspot.twopass.fdr0.01.merge.pks.bed	AG09309	skin	peaks	Peaks
171	1e-14	1	1	-8.83986e-17	8078.39	-15833.6	15833.6	0	2874	0	42264	170	AG09309-DS12352.hotspot.twopass.fdr0.01.merge.pks.bed	AG09309	skin	peaks	Peaks
171	1e-16	1	1	-8.83986e-17	8078.39	-15833.6	15833.6	0	2874	0	42264	170	AG09309-DS12352.hotspot.twopass.fdr0.01.merge.pks.bed	AG09309	skin	peaks	Peaks
171	1e-18	1	1	-8.83986e-17	8078.39	-15833.6	15833.6	0	2874	0	42264	170	AG09309-DS12352.hotspot.twopass.fdr0.01.merge.pks.bed	AG09309	skin	peaks	Peaks
171	1e-20	1	1	-8.83986e-17	8078.39	-15833.6	15833.6	0	2874	0	42264	170	AG09309-DS12352.hotspot.twopass.fdr0.01.merge.pks.bed	AG09309	skin	peaks	Peaks
172	0.01	1.55184	0.00761594	0.439441	0.164669	0.11669	0.762191	53	2075	750	42264	171	AG09319-DS12291.hotspot.twopass.fdr0.01.merge.pks.bed	AG09319	gingival	peaks	Peaks
172	0.0001	4.43044	0.00513528	1.4885	0.531907	0.445963	2.53104	7	2075	36	42264	171	AG09319-DS12291.hotspot.twopass.fdr0.01.merge.pks.bed	AG09319	gingival	peaks	Peaks
172	1e-06	1.79454e-06	0.998023	-13.2308	5339.38	-10478.4	10451.9	0	2075	3	42264	171	AG09319-DS12291.hotspot.twopass.fdr0.01.merge.pks.bed	AG09319	gingival	peaks	Peaks
172	1e-08	6.08214e-06	0.998117	-12.0102	5088.03	-9984.55	9960.53	0	2075	2	42264	171	AG09319-DS12291.hotspot.twopass.fdr0.01.merge.pks.bed	AG09319	gingival	peaks	Peaks
172	1e-10	1	1	-7.51399e-17	9236.29	-18103.1	18103.1	0	2075	0	42264	171	AG09319-DS12291.hotspot.twopass.fdr0.01.merge.pks.bed	AG09319	gingival	peaks	Peaks
172	1e-12	1	1	-7.51399e-17	9236.29	-18103.1	18103.1	0	2075	0	42264	171	AG09319-DS12291.hotspot.twopass.fdr0.01.merge.pks.bed	AG09319	gingival	peaks	Peaks
172	1e-14	1	1	-7.51399e-17	9236.29	-18103.1	18103.1	0	2075	0	42264	171	AG09319-DS12291.hotspot.twopass.fdr0.01.merge.pks.bed	AG09319	gingival	peaks	Peaks
172	1e-16	1	1	-7.51399e-17	9236.29	-18103.1	18103.1	0	2075	0	42264	171	AG09319-DS12291.hotspot.twopass.fdr0.01.merge.pks.bed	AG09319	gingival	peaks	Peaks
172	1e-18	1	1	-7.51399e-17	9236.29	-18103.1	18103.1	0	2075	0	42264	171	AG09319-DS12291.hotspot.twopass.fdr0.01.merge.pks.bed	AG09319	gingival	peaks	Peaks
172	1e-20	1	1	-7.51399e-17	9236.29	-18103.1	18103.1	0	2075	0	42264	171	AG09319-DS12291.hotspot.twopass.fdr0.01.merge.pks.bed	AG09319	gingival	peaks	Peaks
173	0.01	1.6107	0.00185261	0.476672	0.153128	0.176541	0.776803	63	2489	750	42264	172	AG10803-DS12384.hotspot.twopass.fdr0.01.merge.pks.bed	AG10803	skin	peaks	Peaks
173	0.0001	3.71538	0.0131402	1.31248	0.529238	0.275175	2.34979	8	2489	36	42264	172	AG10803-DS12384.hotspot.twopass.fdr0.01.merge.pks.bed	AG10803	skin	peaks	Peaks
173	1e-06	1.38756e-06	0.997805	-13.488	4903.97	-9625.28	9598.3	0	2489	3	42264	172	AG10803-DS12384.hotspot.twopass.fdr0.01.merge.pks.bed	AG10803	skin	peaks	Peaks
173	1e-08	1.7419e-06	0.997766	-13.2605	4737.06	-9297.9	9271.38	0	2489	2	42264	172	AG10803-DS12384.hotspot.twopass.fdr0.01.merge.pks.bed	AG10803	skin	peaks	Peaks
173	1e-10	1	1	-1.57147e-16	8585.35	-16827.3	16827.3	0	2489	0	42264	172	AG10803-DS12384.hotspot.twopass.fdr0.01.merge.pks.bed	AG10803	skin	peaks	Peaks
173	1e-12	1	1	-1.57147e-16	8585.35	-16827.3	16827.3	0	2489	0	42264	172	AG10803-DS12384.hotspot.twopass.fdr0.01.merge.pks.bed	AG10803	skin	peaks	Peaks
173	1e-14	1	1	-1.57147e-16	8585.35	-16827.3	16827.3	0	2489	0	42264	172	AG10803-DS12384.hotspot.twopass.fdr0.01.merge.pks.bed	AG10803	skin	peaks	Peaks
173	1e-16	1	1	-1.57147e-16	8585.35	-16827.3	16827.3	0	2489	0	42264	172	AG10803-DS12384.hotspot.twopass.fdr0.01.merge.pks.bed	AG10803	skin	peaks	Peaks
173	1e-18	1	1	-1.57147e-16	8585.35	-16827.3	16827.3	0	2489	0	42264	172	AG10803-DS12384.hotspot.twopass.fdr0.01.merge.pks.bed	AG10803	skin	peaks	Peaks
173	1e-20	1	1	-1.57147e-16	8585.35	-16827.3	16827.3	0	2489	0	42264	172	AG10803-DS12384.hotspot.twopass.fdr0.01.merge.pks.bed	AG10803	skin	peaks	Peaks
174	0.01	1.42085	0.0264902	0.351258	0.158299	0.0409913	0.661525	58	2476	750	42264	173	AoAF-DS13523.hotspot.twopass.fdr0.01.merge.pks.bed	AoAF	blood_vessel	peaks	Peaks
174	0.0001	1.9765	0.235445	0.681329	0.57426	-0.444219	1.80688	5	2476	36	42264	173	AoAF-DS13523.hotspot.twopass.fdr0.01.merge.pks.bed	AoAF	blood_vessel	peaks	Peaks
174	1e-06	1.06199e-06	0.997773	-13.7554	4927.69	-9672.03	9644.52	0	2476	3	42264	173	AoAF-DS13523.hotspot.twopass.fdr0.01.merge.pks.bed	AoAF	blood_vessel	peaks	Peaks
174	1e-08	1.74303e-06	0.997766	-13.2599	4735.53	-9294.9	9268.38	0	2476	2	42264	173	AoAF-DS13523.hotspot.twopass.fdr0.01.merge.pks.bed	AoAF	blood_vessel	peaks	Peaks
174	1e-10	1	1	-1.29481e-16	8586.43	-16829.4	16829.4	0	2476	0	42264	173	AoAF-DS13523.hotspot.twopass.fdr0.01.merge.pks.bed	AoAF	blood_vessel	peaks	Peaks
174	1e-12	1	1	-1.29481e-16	8586.43	-16829.4	16829.4	0	2476	0	42264	173	AoAF-DS13523.hotspot.twopass.fdr0.01.merge.pks.bed	AoAF	blood_vessel	peaks	Peaks
174	1e-14	1	1	-1.29481e-16	8586.43	-16829.4	16829.4	0	2476	0	42264	173	AoAF-DS13523.hotspot.twopass.fdr0.01.merge.pks.bed	AoAF	blood_vessel	peaks	Peaks
174	1e-16	1	1	-1.29481e-16	8586.43	-16829.4	16829.4	0	2476	0	42264	173	AoAF-DS13523.hotspot.twopass.fdr0.01.merge.pks.bed	AoAF	blood_vessel	peaks	Peaks
174	1e-18	1	1	-1.29481e-16	8586.43	-16829.4	16829.4	0	2476	0	42264	173	AoAF-DS13523.hotspot.twopass.fdr0.01.merge.pks.bed	AoAF	blood_vessel	peaks	Peaks
174	1e-20	1	1	-1.29481e-16	8586.43	-16829.4	16829.4	0	2476	0	42264	173	AoAF-DS13523.hotspot.twopass.fdr0.01.merge.pks.bed	AoAF	blood_vessel	peaks	Peaks
175	0.01	1.22701	0.204771	0.204582	0.161333	-0.11163	0.520795	62	2655	750	42264	174	BE_2_C-DS14625.hotspot.twopass.fdr0.01.merge.pks.bed	BE2_C	brain	peaks	Peaks
175	0.0001	1.92138	0.254704	0.653045	0.573351	-0.470723	1.77681	5	2655	36	42264	174	BE_2_C-DS14625.hotspot.twopass.fdr0.01.merge.pks.bed	BE2_C	brain	peaks	Peaks
175	1e-06	1.00013e-06	0.997695	-13.8154	4782.15	-9386.84	9359.21	0	2655	3	42264	174	BE_2_C-DS14625.hotspot.twopass.fdr0.01.merge.pks.bed	BE2_C	brain	peaks	Peaks
175	1e-08	3.82638e-06	0.997803	-12.4736	4530.65	-8892.56	8867.61	0	2655	2	42264	174	BE_2_C-DS14625.hotspot.twopass.fdr0.01.merge.pks.bed	BE2_C	brain	peaks	Peaks
175	1e-10	1	1	-9.16535e-17	8384.84	-16434.3	16434.3	0	2655	0	42264	174	BE_2_C-DS14625.hotspot.twopass.fdr0.01.merge.pks.bed	BE2_C	brain	peaks	Peaks
175	1e-12	1	1	-9.16535e-17	8384.84	-16434.3	16434.3	0	2655	0	42264	174	BE_2_C-DS14625.hotspot.twopass.fdr0.01.merge.pks.bed	BE2_C	brain	peaks	Peaks
175	1e-14	1	1	-9.16535e-17	8384.84	-16434.3	16434.3	0	2655	0	42264	174	BE_2_C-DS14625.hotspot.twopass.fdr0.01.merge.pks.bed	BE2_C	brain	peaks	Peaks
175	1e-16	1	1	-9.16535e-17	8384.84	-16434.3	16434.3	0	2655	0	42264	174	BE_2_C-DS14625.hotspot.twopass.fdr0.01.merge.pks.bed	BE2_C	brain	peaks	Peaks
175	1e-18	1	1	-9.16535e-17	8384.84	-16434.3	16434.3	0	2655	0	42264	174	BE_2_C-DS14625.hotspot.twopass.fdr0.01.merge.pks.bed	BE2_C	brain	peaks	Peaks
175	1e-20	1	1	-9.16535e-17	8384.84	-16434.3	16434.3	0	2655	0	42264	174	BE_2_C-DS14625.hotspot.twopass.fdr0.01.merge.pks.bed	BE2_C	brain	peaks	Peaks
176	0.01	1.1611	0.378624	0.149366	0.16965	-0.183149	0.481881	49	2382	750	42264	175	BJ-DS10081.hotspot.twopass.fdr0.01.merge.pks.bed	BJ	skin	peaks	Peaks
176	0.0001	3.91652	0.0104998	1.3652	0.533508	0.319528	2.41088	7	2382	36	42264	175	BJ-DS10081.hotspot.twopass.fdr0.01.merge.pks.bed	BJ	skin	peaks	Peaks
176	1e-06	1.03429e-06	0.997798	-13.7818	4993.24	-9800.53	9772.97	0	2382	3	42264	175	BJ-DS10081.hotspot.twopass.fdr0.01.merge.pks.bed	BJ	skin	peaks	Peaks
176	1e-08	1.69546e-06	0.997792	-13.2876	4801.5	-9424.23	9397.66	0	2382	2	42264	175	BJ-DS10081.hotspot.twopass.fdr0.01.merge.pks.bed	BJ	skin	peaks	Peaks
176	1e-10	1	1	-3.52966e-17	8708.18	-17068	17068	0	2382	0	42264	175	BJ-DS10081.hotspot.twopass.fdr0.01.merge.pks.bed	BJ	skin	peaks	Peaks
176	1e-12	1	1	-3.52966e-17	8708.18	-17068	17068	0	2382	0	42264	175	BJ-DS10081.hotspot.twopass.fdr0.01.merge.pks.bed	BJ	skin	peaks	Peaks
176	1e-14	1	1	-3.52966e-17	8708.18	-17068	17068	0	2382	0	42264	175	BJ-DS10081.hotspot.twopass.fdr0.01.merge.pks.bed	BJ	skin	peaks	Peaks
176	1e-16	1	1	-3.52966e-17	8708.18	-17068	17068	0	2382	0	42264	175	BJ-DS10081.hotspot.twopass.fdr0.01.merge.pks.bed	BJ	skin	peaks	Peaks
176	1e-18	1	1	-3.52966e-17	8708.18	-17068	17068	0	2382	0	42264	175	BJ-DS10081.hotspot.twopass.fdr0.01.merge.pks.bed	BJ	skin	peaks	Peaks
176	1e-20	1	1	-3.52966e-17	8708.18	-17068	17068	0	2382	0	42264	175	BJ-DS10081.hotspot.twopass.fdr0.01.merge.pks.bed	BJ	skin	peaks	Peaks
177	0.01	1.20887	0.305972	0.189685	0.185291	-0.173486	0.552856	37	1727	750	42264	176	CACO2-DS8235.hotspot.twopass.fdr0.01.merge.pks.bed	Caco-2	colon	peaks	Peaks
177	0.0001	3.02494	0.0468051	1.10689	0.55677	0.0156228	2.19816	6	1727	36	42264	176	CACO2-DS8235.hotspot.twopass.fdr0.01.merge.pks.bed	Caco-2	colon	peaks	Peaks
177	1e-06	1.43513e-06	0.998114	-13.4543	5691.01	-11167.8	11140.9	0	1727	3	42264	176	CACO2-DS8235.hotspot.twopass.fdr0.01.merge.pks.bed	Caco-2	colon	peaks	Peaks
177	1e-08	2.66271e-06	0.998114	-12.8362	5431.16	-10657.9	10632.2	0	1727	2	42264	176	CACO2-DS8235.hotspot.twopass.fdr0.01.merge.pks.bed	Caco-2	colon	peaks	Peaks
177	1e-10	1	1	-1.29887e-16	9662.01	-18937.5	18937.5	0	1727	0	42264	176	CACO2-DS8235.hotspot.twopass.fdr0.01.merge.pks.bed	Caco-2	colon	peaks	Peaks
177	1e-12	1	1	-1.29887e-16	9662.01	-18937.5	18937.5	0	1727	0	42264	176	CACO2-DS8235.hotspot.twopass.fdr0.01.merge.pks.bed	Caco-2	colon	peaks	Peaks
177	1e-14	1	1	-1.29887e-16	9662.01	-18937.5	18937.5	0	1727	0	42264	176	CACO2-DS8235.hotspot.twopass.fdr0.01.merge.pks.bed	Caco-2	colon	peaks	Peaks
177	1e-16	1	1	-1.29887e-16	9662.01	-18937.5	18937.5	0	1727	0	42264	176	CACO2-DS8235.hotspot.twopass.fdr0.01.merge.pks.bed	Caco-2	colon	peaks	Peaks
177	1e-18	1	1	-1.29887e-16	9662.01	-18937.5	18937.5	0	1727	0	42264	176	CACO2-DS8235.hotspot.twopass.fdr0.01.merge.pks.bed	Caco-2	colon	peaks	Peaks
177	1e-20	1	1	-1.29887e-16	9662.01	-18937.5	18937.5	0	1727	0	42264	176	CACO2-DS8235.hotspot.twopass.fdr0.01.merge.pks.bed	Caco-2	colon	peaks	Peaks
178	0.01	1.49753	0.0280289	0.403819	0.183815	0.0435424	0.764096	39	1522	750	42264	177	CD20-DS17541.hg19.hotspot.twopass.fdr0.01.merge.pks.bed	CD20+	blood	peaks	Peaks
178	0.0001	4.32386	0.00695973	1.46415	0.542525	0.400799	2.5275	6	1522	36	42264	177	CD20-DS17541.hg19.hotspot.twopass.fdr0.01.merge.pks.bed	CD20+	blood	peaks	Peaks
178	1e-06	2.06063e-06	0.998277	-13.0925	6064.42	-11899.4	11873.2	0	1522	3	42264	177	CD20-DS17541.hg19.hotspot.twopass.fdr0.01.merge.pks.bed	CD20+	blood	peaks	Peaks
178	1e-08	0.676087	0.999959	-0.391434	7634.4	-14963.8	14963	0	1522	2	42264	177	CD20-DS17541.hg19.hotspot.twopass.fdr0.01.merge.pks.bed	CD20+	blood	peaks	Peaks
178	1e-10	1	1	-1.33303e-16	10327.1	-20241.2	20241.2	0	1522	0	42264	177	CD20-DS17541.hg19.hotspot.twopass.fdr0.01.merge.pks.bed	CD20+	blood	peaks	Peaks
178	1e-12	1	1	-1.33303e-16	10327.1	-20241.2	20241.2	0	1522	0	42264	177	CD20-DS17541.hg19.hotspot.twopass.fdr0.01.merge.pks.bed	CD20+	blood	peaks	Peaks
178	1e-14	1	1	-1.33303e-16	10327.1	-20241.2	20241.2	0	1522	0	42264	177	CD20-DS17541.hg19.hotspot.twopass.fdr0.01.merge.pks.bed	CD20+	blood	peaks	Peaks
178	1e-16	1	1	-1.33303e-16	10327.1	-20241.2	20241.2	0	1522	0	42264	177	CD20-DS17541.hg19.hotspot.twopass.fdr0.01.merge.pks.bed	CD20+	blood	peaks	Peaks
178	1e-18	1	1	-1.33303e-16	10327.1	-20241.2	20241.2	0	1522	0	42264	177	CD20-DS17541.hg19.hotspot.twopass.fdr0.01.merge.pks.bed	CD20+	blood	peaks	Peaks
178	1e-20	1	1	-1.33303e-16	10327.1	-20241.2	20241.2	0	1522	0	42264	177	CD20-DS17541.hg19.hotspot.twopass.fdr0.01.merge.pks.bed	CD20+	blood	peaks	Peaks
179	0.01	1.32987	0.078812	0.285081	0.162197	-0.0328253	0.602988	56	2316	750	42264	178	CD34-DS16814.hg19.hotspot.twopass.fdr0.01.merge.pks.bed	CD34+	blood	peaks	Peaks
179	0.0001	2.7722	0.061796	1.01964	0.545917	-0.0503571	2.08964	6	2316	36	42264	178	CD34-DS16814.hg19.hotspot.twopass.fdr0.01.merge.pks.bed	CD34+	blood	peaks	Peaks
179	1e-06	3.90291e-06	0.997966	-12.4538	4885.39	-9587.81	9562.91	0	2316	3	42264	178	CD34-DS16814.hg19.hotspot.twopass.fdr0.01.merge.pks.bed	CD34+	blood	peaks	Peaks
179	1e-08	7.15617e-06	0.997985	-11.8475	4690.7	-9205.62	9181.93	0	2316	2	42264	178	CD34-DS16814.hg19.hotspot.twopass.fdr0.01.merge.pks.bed	CD34+	blood	peaks	Peaks
179	1e-10	1	1	-1.57082e-16	8642.76	-16939.8	16939.8	0	2316	0	42264	178	CD34-DS16814.hg19.hotspot.twopass.fdr0.01.merge.pks.bed	CD34+	blood	peaks	Peaks
179	1e-12	1	1	-1.57082e-16	8642.76	-16939.8	16939.8	0	2316	0	42264	178	CD34-DS16814.hg19.hotspot.twopass.fdr0.01.merge.pks.bed	CD34+	blood	peaks	Peaks
179	1e-14	1	1	-1.57082e-16	8642.76	-16939.8	16939.8	0	2316	0	42264	178	CD34-DS16814.hg19.hotspot.twopass.fdr0.01.merge.pks.bed	CD34+	blood	peaks	Peaks
179	1e-16	1	1	-1.57082e-16	8642.76	-16939.8	16939.8	0	2316	0	42264	178	CD34-DS16814.hg19.hotspot.twopass.fdr0.01.merge.pks.bed	CD34+	blood	peaks	Peaks
179	1e-18	1	1	-1.57082e-16	8642.76	-16939.8	16939.8	0	2316	0	42264	178	CD34-DS16814.hg19.hotspot.twopass.fdr0.01.merge.pks.bed	CD34+	blood	peaks	Peaks
179	1e-20	1	1	-1.57082e-16	8642.76	-16939.8	16939.8	0	2316	0	42264	178	CD34-DS16814.hg19.hotspot.twopass.fdr0.01.merge.pks.bed	CD34+	blood	peaks	Peaks
180	0.01	1.35251	0.0778318	0.301963	0.171238	-0.0336642	0.63759	48	2014	750	42264	179	CMK-DS12393.hotspot.twopass.fdr0.01.merge.pks.bed	CMK	blood	peaks	Peaks
180	0.0001	3.34235	0.0269089	1.20667	0.545306	0.137873	2.27547	6	2014	36	42264	179	CMK-DS12393.hotspot.twopass.fdr0.01.merge.pks.bed	CMK	blood	peaks	Peaks
180	1e-06	1.26192e-06	0.997966	-13.5829	5327.04	-10454.6	10427.4	0	2014	3	42264	179	CMK-DS12393.hotspot.twopass.fdr0.01.merge.pks.bed	CMK	blood	peaks	Peaks
180	1e-08	1.99243e-06	0.997955	-13.1262	5120.46	-10049.2	10023	0	2014	2	42264	179	CMK-DS12393.hotspot.twopass.fdr0.01.merge.pks.bed	CMK	blood	peaks	Peaks
180	1e-10	1	1	-6.94207e-17	9242.33	-18115	18115	0	2014	0	42264	179	CMK-DS12393.hotspot.twopass.fdr0.01.merge.pks.bed	CMK	blood	peaks	Peaks
180	1e-12	1	1	-6.94207e-17	9242.33	-18115	18115	0	2014	0	42264	179	CMK-DS12393.hotspot.twopass.fdr0.01.merge.pks.bed	CMK	blood	peaks	Peaks
180	1e-14	1	1	-6.94207e-17	9242.33	-18115	18115	0	2014	0	42264	179	CMK-DS12393.hotspot.twopass.fdr0.01.merge.pks.bed	CMK	blood	peaks	Peaks
180	1e-16	1	1	-6.94207e-17	9242.33	-18115	18115	0	2014	0	42264	179	CMK-DS12393.hotspot.twopass.fdr0.01.merge.pks.bed	CMK	blood	peaks	Peaks
180	1e-18	1	1	-6.94207e-17	9242.33	-18115	18115	0	2014	0	42264	179	CMK-DS12393.hotspot.twopass.fdr0.01.merge.pks.bed	CMK	blood	peaks	Peaks
180	1e-20	1	1	-6.94207e-17	9242.33	-18115	18115	0	2014	0	42264	179	CMK-DS12393.hotspot.twopass.fdr0.01.merge.pks.bed	CMK	blood	peaks	Peaks
181	0.01	1.46512	0.0254908	0.381939	0.170976	0.0468272	0.717051	46	1885	750	42264	180	E_myoblast_AllReps.30000000.hotspot.twopass.fdr0.01.merge.pks.bed	E_myoblast	muscle	peaks	Peaks
181	0.0001	3.61053	0.0189144	1.28385	0.54697	0.211794	2.35591	6	1885	36	42264	180	E_myoblast_AllReps.30000000.hotspot.twopass.fdr0.01.merge.pks.bed	E_myoblast	muscle	peaks	Peaks
181	1e-06	2.51309e-06	0.998127	-12.894	5491.43	-10776.1	10750.3	0	1885	3	42264	180	E_myoblast_AllReps.30000000.hotspot.twopass.fdr0.01.merge.pks.bed	E_myoblast	muscle	peaks	Peaks
181	1e-08	0.869181	0.999984	-0.140204	7107.31	-13930.5	13930.2	0	1885	2	42264	180	E_myoblast_AllReps.30000000.hotspot.twopass.fdr0.01.merge.pks.bed	E_myoblast	muscle	peaks	Peaks
181	1e-10	1	1	-1.48411e-16	9468.82	-18558.9	18558.9	0	1885	0	42264	180	E_myoblast_AllReps.30000000.hotspot.twopass.fdr0.01.merge.pks.bed	E_myoblast	muscle	peaks	Peaks
181	1e-12	1	1	-1.48411e-16	9468.82	-18558.9	18558.9	0	1885	0	42264	180	E_myoblast_AllReps.30000000.hotspot.twopass.fdr0.01.merge.pks.bed	E_myoblast	muscle	peaks	Peaks
181	1e-14	1	1	-1.48411e-16	9468.82	-18558.9	18558.9	0	1885	0	42264	180	E_myoblast_AllReps.30000000.hotspot.twopass.fdr0.01.merge.pks.bed	E_myoblast	muscle	peaks	Peaks
181	1e-16	1	1	-1.48411e-16	9468.82	-18558.9	18558.9	0	1885	0	42264	180	E_myoblast_AllReps.30000000.hotspot.twopass.fdr0.01.merge.pks.bed	E_myoblast	muscle	peaks	Peaks
181	1e-18	1	1	-1.48411e-16	9468.82	-18558.9	18558.9	0	1885	0	42264	180	E_myoblast_AllReps.30000000.hotspot.twopass.fdr0.01.merge.pks.bed	E_myoblast	muscle	peaks	Peaks
181	1e-20	1	1	-1.48411e-16	9468.82	-18558.9	18558.9	0	1885	0	42264	180	E_myoblast_AllReps.30000000.hotspot.twopass.fdr0.01.merge.pks.bed	E_myoblast	muscle	peaks	Peaks
182	0.01	1.46453	0.0521241	0.381535	0.196454	-0.00351506	0.766586	35	1336	750	42264	181	GM06990-DS7748.hotspot.twopass.fdr0.01.merge.pks.bed	GM06990	blood	peaks	Peaks
182	0.0001	2.7299	0.102644	1.00427	0.615296	-0.201714	2.21025	4	1336	36	42264	181	GM06990-DS7748.hotspot.twopass.fdr0.01.merge.pks.bed	GM06990	blood	peaks	Peaks
182	1e-06	1.08365e-06	0.998327	-13.7352	6549.23	-12850.2	12822.8	0	1336	3	42264	181	GM06990-DS7748.hotspot.twopass.fdr0.01.merge.pks.bed	GM06990	blood	peaks	Peaks
182	1e-08	1.99467e-06	0.998331	-13.125	6275.08	-12312.3	12286	0	1336	2	42264	181	GM06990-DS7748.hotspot.twopass.fdr0.01.merge.pks.bed	GM06990	blood	peaks	Peaks
182	1e-10	1	1	-6.57899e-17	11051	-21659.9	21659.9	0	1336	0	42264	181	GM06990-DS7748.hotspot.twopass.fdr0.01.merge.pks.bed	GM06990	blood	peaks	Peaks
182	1e-12	1	1	-6.57899e-17	11051	-21659.9	21659.9	0	1336	0	42264	181	GM06990-DS7748.hotspot.twopass.fdr0.01.merge.pks.bed	GM06990	blood	peaks	Peaks
182	1e-14	1	1	-6.57899e-17	11051	-21659.9	21659.9	0	1336	0	42264	181	GM06990-DS7748.hotspot.twopass.fdr0.01.merge.pks.bed	GM06990	blood	peaks	Peaks
182	1e-16	1	1	-6.57899e-17	11051	-21659.9	21659.9	0	1336	0	42264	181	GM06990-DS7748.hotspot.twopass.fdr0.01.merge.pks.bed	GM06990	blood	peaks	Peaks
182	1e-18	1	1	-6.57899e-17	11051	-21659.9	21659.9	0	1336	0	42264	181	GM06990-DS7748.hotspot.twopass.fdr0.01.merge.pks.bed	GM06990	blood	peaks	Peaks
182	1e-20	1	1	-6.57899e-17	11051	-21659.9	21659.9	0	1336	0	42264	181	GM06990-DS7748.hotspot.twopass.fdr0.01.merge.pks.bed	GM06990	blood	peaks	Peaks
183	0.01	1.1391	0.468121	0.130239	0.179507	-0.221594	0.482073	42	2030	750	42264	182	GM12864-DS12431.hotspot.twopass.fdr0.01.merge.pks.bed	GM12864	blood	peaks	Peaks
183	0.0001	4.32008	0.00565949	1.46327	0.528852	0.426723	2.49982	7	2030	36	42264	182	GM12864-DS12431.hotspot.twopass.fdr0.01.merge.pks.bed	GM12864	blood	peaks	Peaks
183	1e-06	2.3776e-06	0.99804	-12.9494	5271.79	-10345.7	10319.8	0	2030	3	42264	182	GM12864-DS12431.hotspot.twopass.fdr0.01.merge.pks.bed	GM12864	blood	peaks	Peaks
183	1e-08	6.18749e-06	0.998103	-11.993	5044.53	-9899.28	9875.29	0	2030	2	42264	182	GM12864-DS12431.hotspot.twopass.fdr0.01.merge.pks.bed	GM12864	blood	peaks	Peaks
183	1e-10	1	1	-1.27166e-16	9170.96	-17975.1	17975.1	0	2030	0	42264	182	GM12864-DS12431.hotspot.twopass.fdr0.01.merge.pks.bed	GM12864	blood	peaks	Peaks
183	1e-12	1	1	-1.27166e-16	9170.96	-17975.1	17975.1	0	2030	0	42264	182	GM12864-DS12431.hotspot.twopass.fdr0.01.merge.pks.bed	GM12864	blood	peaks	Peaks
183	1e-14	1	1	-1.27166e-16	9170.96	-17975.1	17975.1	0	2030	0	42264	182	GM12864-DS12431.hotspot.twopass.fdr0.01.merge.pks.bed	GM12864	blood	peaks	Peaks
183	1e-16	1	1	-1.27166e-16	9170.96	-17975.1	17975.1	0	2030	0	42264	182	GM12864-DS12431.hotspot.twopass.fdr0.01.merge.pks.bed	GM12864	blood	peaks	Peaks
183	1e-18	1	1	-1.27166e-16	9170.96	-17975.1	17975.1	0	2030	0	42264	182	GM12864-DS12431.hotspot.twopass.fdr0.01.merge.pks.bed	GM12864	blood	peaks	Peaks
183	1e-20	1	1	-1.27166e-16	9170.96	-17975.1	17975.1	0	2030	0	42264	182	GM12864-DS12431.hotspot.twopass.fdr0.01.merge.pks.bed	GM12864	blood	peaks	Peaks
184	0.01	1.11888	0.527968	0.112329	0.177986	-0.236523	0.46118	49	2138	750	42264	183	GM12865-DS12436.hotspot.twopass.fdr0.01.merge.pks.bed	GM12865	blood	peaks	Peaks
184	0.0001	3.16564	0.0356258	1.15235	0.548434	0.0774243	2.22729	6	2138	36	42264	183	GM12865-DS12436.hotspot.twopass.fdr0.01.merge.pks.bed	GM12865	blood	peaks	Peaks
184	1e-06	1.20338e-06	0.997921	-13.6304	5232.27	-10268.9	10241.6	0	2138	3	42264	183	GM12865-DS12436.hotspot.twopass.fdr0.01.merge.pks.bed	GM12865	blood	peaks	Peaks
184	1e-08	3.1449e-06	0.997977	-12.6697	4997.49	-9807.75	9782.41	0	2138	2	42264	183	GM12865-DS12436.hotspot.twopass.fdr0.01.merge.pks.bed	GM12865	blood	peaks	Peaks
184	1e-10	1	1	-8.04756e-17	9058.98	-17755.6	17755.6	0	2138	0	42264	183	GM12865-DS12436.hotspot.twopass.fdr0.01.merge.pks.bed	GM12865	blood	peaks	Peaks
184	1e-12	1	1	-8.04756e-17	9058.98	-17755.6	17755.6	0	2138	0	42264	183	GM12865-DS12436.hotspot.twopass.fdr0.01.merge.pks.bed	GM12865	blood	peaks	Peaks
184	1e-14	1	1	-8.04756e-17	9058.98	-17755.6	17755.6	0	2138	0	42264	183	GM12865-DS12436.hotspot.twopass.fdr0.01.merge.pks.bed	GM12865	blood	peaks	Peaks
184	1e-16	1	1	-8.04756e-17	9058.98	-17755.6	17755.6	0	2138	0	42264	183	GM12865-DS12436.hotspot.twopass.fdr0.01.merge.pks.bed	GM12865	blood	peaks	Peaks
184	1e-18	1	1	-8.04756e-17	9058.98	-17755.6	17755.6	0	2138	0	42264	183	GM12865-DS12436.hotspot.twopass.fdr0.01.merge.pks.bed	GM12865	blood	peaks	Peaks
184	1e-20	1	1	-8.04756e-17	9058.98	-17755.6	17755.6	0	2138	0	42264	183	GM12865-DS12436.hotspot.twopass.fdr0.01.merge.pks.bed	GM12865	blood	peaks	Peaks
185	0.01	1.04739	0.787825	0.0463006	0.172034	-0.290887	0.383488	46	2385	750	42264	184	GM12878-all.fdr0.01.bed	GM12878	blood	peaks	Peaks
185	0.0001	2.67074	0.0712654	0.982356	0.544609	-0.0850772	2.04979	6	2385	36	42264	184	GM12878-all.fdr0.01.bed	GM12878	blood	peaks	Peaks
185	1e-06	3.24845e-06	0.997912	-12.6373	4830.05	-9479.54	9454.26	0	2385	3	42264	184	GM12878-all.fdr0.01.bed	GM12878	blood	peaks	Peaks
185	1e-08	0.722398	0.999958	-0.325179	6235.79	-12222.5	12221.8	0	2385	2	42264	184	GM12878-all.fdr0.01.bed	GM12878	blood	peaks	Peaks
185	1e-10	1	1	-8.17544e-17	8526.34	-16711.6	16711.6	0	2385	0	42264	184	GM12878-all.fdr0.01.bed	GM12878	blood	peaks	Peaks
185	1e-12	1	1	-8.17544e-17	8526.34	-16711.6	16711.6	0	2385	0	42264	184	GM12878-all.fdr0.01.bed	GM12878	blood	peaks	Peaks
185	1e-14	1	1	-8.17544e-17	8526.34	-16711.6	16711.6	0	2385	0	42264	184	GM12878-all.fdr0.01.bed	GM12878	blood	peaks	Peaks
185	1e-16	1	1	-8.17544e-17	8526.34	-16711.6	16711.6	0	2385	0	42264	184	GM12878-all.fdr0.01.bed	GM12878	blood	peaks	Peaks
185	1e-18	1	1	-8.17544e-17	8526.34	-16711.6	16711.6	0	2385	0	42264	184	GM12878-all.fdr0.01.bed	GM12878	blood	peaks	Peaks
185	1e-20	1	1	-8.17544e-17	8526.34	-16711.6	16711.6	0	2385	0	42264	184	GM12878-all.fdr0.01.bed	GM12878	blood	peaks	Peaks
186	0.01	1.18218	0.300261	0.167363	0.161567	-0.149308	0.484035	57	2716	750	42264	185	HAc-DS14765.hotspot.twopass.fdr0.01.merge.pks.bed	HAc	cerebellar	peaks	Peaks
186	0.0001	1.84384	0.284931	0.61185	0.572193	-0.509649	1.73335	6	2716	36	42264	185	HAc-DS14765.hotspot.twopass.fdr0.01.merge.pks.bed	HAc	cerebellar	peaks	Peaks
186	1e-06	1.04343e-06	0.997667	-13.773	4709.76	-9244.9	9217.36	0	2716	3	42264	185	HAc-DS14765.hotspot.twopass.fdr0.01.merge.pks.bed	HAc	cerebellar	peaks	Peaks
186	1e-08	1.90945e-06	0.997678	-13.1687	4524.46	-8881.12	8854.78	0	2716	2	42264	185	HAc-DS14765.hotspot.twopass.fdr0.01.merge.pks.bed	HAc	cerebellar	peaks	Peaks
186	1e-10	1	1	-6.61016e-17	8298.23	-16264.5	16264.5	0	2716	0	42264	185	HAc-DS14765.hotspot.twopass.fdr0.01.merge.pks.bed	HAc	cerebellar	peaks	Peaks
186	1e-12	1	1	-6.61016e-17	8298.23	-16264.5	16264.5	0	2716	0	42264	185	HAc-DS14765.hotspot.twopass.fdr0.01.merge.pks.bed	HAc	cerebellar	peaks	Peaks
186	1e-14	1	1	-6.61016e-17	8298.23	-16264.5	16264.5	0	2716	0	42264	185	HAc-DS14765.hotspot.twopass.fdr0.01.merge.pks.bed	HAc	cerebellar	peaks	Peaks
186	1e-16	1	1	-6.61016e-17	8298.23	-16264.5	16264.5	0	2716	0	42264	185	HAc-DS14765.hotspot.twopass.fdr0.01.merge.pks.bed	HAc	cerebellar	peaks	Peaks
186	1e-18	1	1	-6.61016e-17	8298.23	-16264.5	16264.5	0	2716	0	42264	185	HAc-DS14765.hotspot.twopass.fdr0.01.merge.pks.bed	HAc	cerebellar	peaks	Peaks
186	1e-20	1	1	-6.61016e-17	8298.23	-16264.5	16264.5	0	2716	0	42264	185	HAc-DS14765.hotspot.twopass.fdr0.01.merge.pks.bed	HAc	cerebellar	peaks	Peaks
187	0.01	1.29545	0.0912381	0.258856	0.153269	-0.0415508	0.559264	65	2941	750	42264	186	HAEpiC-DS12663.hotspot.twopass.fdr0.01.merge.pks.bed	HAEpiC	epithelium	peaks	Peaks
187	0.0001	2.22708	0.145071	0.800693	0.549487	-0.276302	1.87769	6	2941	36	42264	186	HAEpiC-DS12663.hotspot.twopass.fdr0.01.merge.pks.bed	HAEpiC	epithelium	peaks	Peaks
187	1e-06	1.02001e-06	0.997573	-13.7957	4536.06	-8904.48	8876.89	0	2941	3	42264	186	HAEpiC-DS12663.hotspot.twopass.fdr0.01.merge.pks.bed	HAEpiC	epithelium	peaks	Peaks
187	1e-08	2.0673e-06	0.997598	-13.0893	4348.29	-8535.75	8509.57	0	2941	2	42264	186	HAEpiC-DS12663.hotspot.twopass.fdr0.01.merge.pks.bed	HAEpiC	epithelium	peaks	Peaks
187	1e-10	1	1	-8.26943e-17	8036.89	-15752.3	15752.3	0	2941	0	42264	186	HAEpiC-DS12663.hotspot.twopass.fdr0.01.merge.pks.bed	HAEpiC	epithelium	peaks	Peaks
187	1e-12	1	1	-8.26943e-17	8036.89	-15752.3	15752.3	0	2941	0	42264	186	HAEpiC-DS12663.hotspot.twopass.fdr0.01.merge.pks.bed	HAEpiC	epithelium	peaks	Peaks
187	1e-14	1	1	-8.26943e-17	8036.89	-15752.3	15752.3	0	2941	0	42264	186	HAEpiC-DS12663.hotspot.twopass.fdr0.01.merge.pks.bed	HAEpiC	epithelium	peaks	Peaks
187	1e-16	1	1	-8.26943e-17	8036.89	-15752.3	15752.3	0	2941	0	42264	186	HAEpiC-DS12663.hotspot.twopass.fdr0.01.merge.pks.bed	HAEpiC	epithelium	peaks	Peaks
187	1e-18	1	1	-8.26943e-17	8036.89	-15752.3	15752.3	0	2941	0	42264	186	HAEpiC-DS12663.hotspot.twopass.fdr0.01.merge.pks.bed	HAEpiC	epithelium	peaks	Peaks
187	1e-20	1	1	-8.26943e-17	8036.89	-15752.3	15752.3	0	2941	0	42264	186	HAEpiC-DS12663.hotspot.twopass.fdr0.01.merge.pks.bed	HAEpiC	epithelium	peaks	Peaks
188	0.01	1.24387	0.158832	0.218224	0.154877	-0.0853359	0.521783	63	2940	750	42264	187	HAh-DS15192.hotspot.twopass.fdr0.01.merge.pks.bed	HA-h	brain_hippocampus	peaks	Peaks
188	0.0001	2.3221	0.122653	0.842472	0.545737	-0.227173	1.91212	6	2940	36	42264	187	HAh-DS15192.hotspot.twopass.fdr0.01.merge.pks.bed	HA-h	brain_hippocampus	peaks	Peaks
188	1e-06	1.1255e-06	0.99759	-13.6973	4534.79	-8901.88	8874.49	0	2940	3	42264	187	HAh-DS15192.hotspot.twopass.fdr0.01.merge.pks.bed	HA-h	brain_hippocampus	peaks	Peaks
188	1e-08	2.06101e-06	0.997601	-13.0923	4354.92	-8548.74	8522.55	0	2940	2	42264	187	HAh-DS15192.hotspot.twopass.fdr0.01.merge.pks.bed	HA-h	brain_hippocampus	peaks	Peaks
188	1e-10	1	1	-9.44718e-17	8041.37	-15761.1	15761.1	0	2940	0	42264	187	HAh-DS15192.hotspot.twopass.fdr0.01.merge.pks.bed	HA-h	brain_hippocampus	peaks	Peaks
188	1e-12	1	1	-9.44718e-17	8041.37	-15761.1	15761.1	0	2940	0	42264	187	HAh-DS15192.hotspot.twopass.fdr0.01.merge.pks.bed	HA-h	brain_hippocampus	peaks	Peaks
188	1e-14	1	1	-9.44718e-17	8041.37	-15761.1	15761.1	0	2940	0	42264	187	HAh-DS15192.hotspot.twopass.fdr0.01.merge.pks.bed	HA-h	brain_hippocampus	peaks	Peaks
188	1e-16	1	1	-9.44718e-17	8041.37	-15761.1	15761.1	0	2940	0	42264	187	HAh-DS15192.hotspot.twopass.fdr0.01.merge.pks.bed	HA-h	brain_hippocampus	peaks	Peaks
188	1e-18	1	1	-9.44718e-17	8041.37	-15761.1	15761.1	0	2940	0	42264	187	HAh-DS15192.hotspot.twopass.fdr0.01.merge.pks.bed	HA-h	brain_hippocampus	peaks	Peaks
188	1e-20	1	1	-9.44718e-17	8041.37	-15761.1	15761.1	0	2940	0	42264	187	HAh-DS15192.hotspot.twopass.fdr0.01.merge.pks.bed	HA-h	brain_hippocampus	peaks	Peaks
189	0.01	1.17578	0.30971	0.161932	0.159408	-0.150508	0.474372	59	2907	750	42264	188	HAsp-DS14790.hotspot.twopass.fdr0.01.merge.pks.bed	HA-sp	spinal_cord	peaks	Peaks
189	0.0001	1.15938	0.809915	0.147886	0.614821	-1.05716	1.35294	4	2907	36	42264	188	HAsp-DS14790.hotspot.twopass.fdr0.01.merge.pks.bed	HA-sp	spinal_cord	peaks	Peaks
189	1e-06	1.8662e-06	0.997685	-13.1916	4546.14	-8923.63	8897.25	0	2907	3	42264	188	HAsp-DS14790.hotspot.twopass.fdr0.01.merge.pks.bed	HA-sp	spinal_cord	peaks	Peaks
189	1e-08	4.10983e-06	0.997736	-12.4021	4371.63	-8580.79	8555.99	0	2907	2	42264	188	HAsp-DS14790.hotspot.twopass.fdr0.01.merge.pks.bed	HA-sp	spinal_cord	peaks	Peaks
189	1e-10	1	1	1.24236e-17	8166.76	-16006.8	16006.8	0	2907	0	42264	188	HAsp-DS14790.hotspot.twopass.fdr0.01.merge.pks.bed	HA-sp	spinal_cord	peaks	Peaks
189	1e-12	1	1	1.24236e-17	8166.76	-16006.8	16006.8	0	2907	0	42264	188	HAsp-DS14790.hotspot.twopass.fdr0.01.merge.pks.bed	HA-sp	spinal_cord	peaks	Peaks
189	1e-14	1	1	1.24236e-17	8166.76	-16006.8	16006.8	0	2907	0	42264	188	HAsp-DS14790.hotspot.twopass.fdr0.01.merge.pks.bed	HA-sp	spinal_cord	peaks	Peaks
189	1e-16	1	1	1.24236e-17	8166.76	-16006.8	16006.8	0	2907	0	42264	188	HAsp-DS14790.hotspot.twopass.fdr0.01.merge.pks.bed	HA-sp	spinal_cord	peaks	Peaks
189	1e-18	1	1	1.24236e-17	8166.76	-16006.8	16006.8	0	2907	0	42264	188	HAsp-DS14790.hotspot.twopass.fdr0.01.merge.pks.bed	HA-sp	spinal_cord	peaks	Peaks
189	1e-20	1	1	1.24236e-17	8166.76	-16006.8	16006.8	0	2907	0	42264	188	HAsp-DS14790.hotspot.twopass.fdr0.01.merge.pks.bed	HA-sp	spinal_cord	peaks	Peaks
190	0.01	0.960487	0.809344	-0.040315	0.167093	-0.367818	0.287188	54	2961	750	42264	189	HBMEC-DS13817.hotspot.twopass.fdr0.01.merge.pks.bed	HBMEC	blood_vessel	peaks	Peaks
190	0.0001	1.64207	0.390652	0.495957	0.577745	-0.636423	1.62834	5	2961	36	42264	189	HBMEC-DS13817.hotspot.twopass.fdr0.01.merge.pks.bed	HBMEC	blood_vessel	peaks	Peaks
190	1e-06	4.69612e-06	0.997802	-12.2688	4453.73	-8741.57	8717.04	0	2961	3	42264	189	HBMEC-DS13817.hotspot.twopass.fdr0.01.merge.pks.bed	HBMEC	blood_vessel	peaks	Peaks
190	1e-08	8.5535e-06	0.99783	-11.6692	4290.48	-8421.01	8397.67	0	2961	2	42264	189	HBMEC-DS13817.hotspot.twopass.fdr0.01.merge.pks.bed	HBMEC	blood_vessel	peaks	Peaks
190	1e-10	1	1	-6.13002e-17	8080.4	-15837.6	15837.6	0	2961	0	42264	189	HBMEC-DS13817.hotspot.twopass.fdr0.01.merge.pks.bed	HBMEC	blood_vessel	peaks	Peaks
190	1e-12	1	1	-6.13002e-17	8080.4	-15837.6	15837.6	0	2961	0	42264	189	HBMEC-DS13817.hotspot.twopass.fdr0.01.merge.pks.bed	HBMEC	blood_vessel	peaks	Peaks
190	1e-14	1	1	-6.13002e-17	8080.4	-15837.6	15837.6	0	2961	0	42264	189	HBMEC-DS13817.hotspot.twopass.fdr0.01.merge.pks.bed	HBMEC	blood_vessel	peaks	Peaks
190	1e-16	1	1	-6.13002e-17	8080.4	-15837.6	15837.6	0	2961	0	42264	189	HBMEC-DS13817.hotspot.twopass.fdr0.01.merge.pks.bed	HBMEC	blood_vessel	peaks	Peaks
190	1e-18	1	1	-6.13002e-17	8080.4	-15837.6	15837.6	0	2961	0	42264	189	HBMEC-DS13817.hotspot.twopass.fdr0.01.merge.pks.bed	HBMEC	blood_vessel	peaks	Peaks
190	1e-20	1	1	-6.13002e-17	8080.4	-15837.6	15837.6	0	2961	0	42264	189	HBMEC-DS13817.hotspot.twopass.fdr0.01.merge.pks.bed	HBMEC	blood_vessel	peaks	Peaks
191	0.01	1.28087	0.118938	0.247543	0.158758	-0.0636229	0.558709	62	2685	750	42264	190	HCFaa-DS13480.hotspot.twopass.fdr0.01.merge.pks.bed	HCFaa	heart	peaks	Peaks
191	0.0001	2.44245	0.107039	0.893	0.554092	-0.19302	1.97902	6	2685	36	42264	190	HCFaa-DS13480.hotspot.twopass.fdr0.01.merge.pks.bed	HCFaa	heart	peaks	Peaks
191	1e-06	1.93242e-06	0.997762	-13.1567	4689.95	-9205.46	9179.15	0	2685	3	42264	190	HCFaa-DS13480.hotspot.twopass.fdr0.01.merge.pks.bed	HCFaa	heart	peaks	Peaks
191	1e-08	2.54044e-06	0.997733	-12.8832	4534.67	-8900.83	8875.07	0	2685	2	42264	190	HCFaa-DS13480.hotspot.twopass.fdr0.01.merge.pks.bed	HCFaa	heart	peaks	Peaks
191	1e-10	1	1	-9.76613e-17	8339.78	-16346	16346	0	2685	0	42264	190	HCFaa-DS13480.hotspot.twopass.fdr0.01.merge.pks.bed	HCFaa	heart	peaks	Peaks
191	1e-12	1	1	-9.76613e-17	8339.78	-16346	16346	0	2685	0	42264	190	HCFaa-DS13480.hotspot.twopass.fdr0.01.merge.pks.bed	HCFaa	heart	peaks	Peaks
191	1e-14	1	1	-9.76613e-17	8339.78	-16346	16346	0	2685	0	42264	190	HCFaa-DS13480.hotspot.twopass.fdr0.01.merge.pks.bed	HCFaa	heart	peaks	Peaks
191	1e-16	1	1	-9.76613e-17	8339.78	-16346	16346	0	2685	0	42264	190	HCFaa-DS13480.hotspot.twopass.fdr0.01.merge.pks.bed	HCFaa	heart	peaks	Peaks
191	1e-18	1	1	-9.76613e-17	8339.78	-16346	16346	0	2685	0	42264	190	HCFaa-DS13480.hotspot.twopass.fdr0.01.merge.pks.bed	HCFaa	heart	peaks	Peaks
191	1e-20	1	1	-9.76613e-17	8339.78	-16346	16346	0	2685	0	42264	190	HCFaa-DS13480.hotspot.twopass.fdr0.01.merge.pks.bed	HCFaa	heart	peaks	Peaks
192	0.01	1.33145	0.0747649	0.286269	0.160654	-0.0286117	0.60115	58	2513	750	42264	191	HCF-DS12501.hotspot.twopass.fdr0.01.merge.pks.bed	HCF	heart	peaks	Peaks
192	0.0001	1.92616	0.25428	0.65553	0.575018	-0.471506	1.78257	6	2513	36	42264	191	HCF-DS12501.hotspot.twopass.fdr0.01.merge.pks.bed	HCF	heart	peaks	Peaks
192	1e-06	1.00746e-06	0.997755	-13.8081	4908.01	-9633.5	9605.88	0	2513	3	42264	191	HCF-DS12501.hotspot.twopass.fdr0.01.merge.pks.bed	HCF	heart	peaks	Peaks
192	1e-08	2.38255e-06	0.997794	-12.9473	4682.51	-9190.68	9164.78	0	2513	2	42264	191	HCF-DS12501.hotspot.twopass.fdr0.01.merge.pks.bed	HCF	heart	peaks	Peaks
192	1e-10	1	1	-1.26676e-16	8544.49	-16747.2	16747.2	0	2513	0	42264	191	HCF-DS12501.hotspot.twopass.fdr0.01.merge.pks.bed	HCF	heart	peaks	Peaks
192	1e-12	1	1	-1.26676e-16	8544.49	-16747.2	16747.2	0	2513	0	42264	191	HCF-DS12501.hotspot.twopass.fdr0.01.merge.pks.bed	HCF	heart	peaks	Peaks
192	1e-14	1	1	-1.26676e-16	8544.49	-16747.2	16747.2	0	2513	0	42264	191	HCF-DS12501.hotspot.twopass.fdr0.01.merge.pks.bed	HCF	heart	peaks	Peaks
192	1e-16	1	1	-1.26676e-16	8544.49	-16747.2	16747.2	0	2513	0	42264	191	HCF-DS12501.hotspot.twopass.fdr0.01.merge.pks.bed	HCF	heart	peaks	Peaks
192	1e-18	1	1	-1.26676e-16	8544.49	-16747.2	16747.2	0	2513	0	42264	191	HCF-DS12501.hotspot.twopass.fdr0.01.merge.pks.bed	HCF	heart	peaks	Peaks
192	1e-20	1	1	-1.26676e-16	8544.49	-16747.2	16747.2	0	2513	0	42264	191	HCF-DS12501.hotspot.twopass.fdr0.01.merge.pks.bed	HCF	heart	peaks	Peaks
193	0.01	1.26177	0.138737	0.232518	0.157052	-0.0753047	0.540341	62	2770	750	42264	192	HCM-DS12599.hotspot.twopass.fdr0.01.merge.pks.bed	HCM	heart	peaks	Peaks
193	0.0001	1.21515	0.74968	0.194866	0.610748	-1.0022	1.39193	5	2770	36	42264	192	HCM-DS12599.hotspot.twopass.fdr0.01.merge.pks.bed	HCM	heart	peaks	Peaks
193	1e-06	1.13985e-06	0.997644	-13.6846	4634.97	-9098.22	9070.85	0	2770	3	42264	192	HCM-DS12599.hotspot.twopass.fdr0.01.merge.pks.bed	HCM	heart	peaks	Peaks
193	1e-08	1.5561e-06	0.997617	-13.3733	4477.5	-8789.28	8762.53	0	2770	2	42264	192	HCM-DS12599.hotspot.twopass.fdr0.01.merge.pks.bed	HCM	heart	peaks	Peaks
193	1e-10	1	1	-5.74461e-17	8199.83	-16071.7	16071.7	0	2770	0	42264	192	HCM-DS12599.hotspot.twopass.fdr0.01.merge.pks.bed	HCM	heart	peaks	Peaks
193	1e-12	1	1	-5.74461e-17	8199.83	-16071.7	16071.7	0	2770	0	42264	192	HCM-DS12599.hotspot.twopass.fdr0.01.merge.pks.bed	HCM	heart	peaks	Peaks
193	1e-14	1	1	-5.74461e-17	8199.83	-16071.7	16071.7	0	2770	0	42264	192	HCM-DS12599.hotspot.twopass.fdr0.01.merge.pks.bed	HCM	heart	peaks	Peaks
193	1e-16	1	1	-5.74461e-17	8199.83	-16071.7	16071.7	0	2770	0	42264	192	HCM-DS12599.hotspot.twopass.fdr0.01.merge.pks.bed	HCM	heart	peaks	Peaks
193	1e-18	1	1	-5.74461e-17	8199.83	-16071.7	16071.7	0	2770	0	42264	192	HCM-DS12599.hotspot.twopass.fdr0.01.merge.pks.bed	HCM	heart	peaks	Peaks
193	1e-20	1	1	-5.74461e-17	8199.83	-16071.7	16071.7	0	2770	0	42264	192	HCM-DS12599.hotspot.twopass.fdr0.01.merge.pks.bed	HCM	heart	peaks	Peaks
194	0.01	1.17496	0.355878	0.161234	0.174638	-0.181056	0.503524	47	2229	750	42264	193	HConF-DS11642.hotspot.twopass.fdr0.01.merge.pks.bed	HConF	eye	peaks	Peaks
194	0.0001	3.05042	0.043346	1.11528	0.55202	0.0333204	2.19724	6	2229	36	42264	193	HConF-DS11642.hotspot.twopass.fdr0.01.merge.pks.bed	HConF	eye	peaks	Peaks
194	1e-06	6.7035e-07	0.99784	-14.2155	5250.22	-10304.6	10276.2	0	2229	3	42264	193	HConF-DS11642.hotspot.twopass.fdr0.01.merge.pks.bed	HConF	eye	peaks	Peaks
194	1e-08	1.2358e-06	0.99784	-13.6038	5024.36	-9861.34	9834.14	0	2229	2	42264	193	HConF-DS11642.hotspot.twopass.fdr0.01.merge.pks.bed	HConF	eye	peaks	Peaks
194	1e-10	1	1	-1.25832e-16	9006.72	-17653.2	17653.2	0	2229	0	42264	193	HConF-DS11642.hotspot.twopass.fdr0.01.merge.pks.bed	HConF	eye	peaks	Peaks
194	1e-12	1	1	-1.25832e-16	9006.72	-17653.2	17653.2	0	2229	0	42264	193	HConF-DS11642.hotspot.twopass.fdr0.01.merge.pks.bed	HConF	eye	peaks	Peaks
194	1e-14	1	1	-1.25832e-16	9006.72	-17653.2	17653.2	0	2229	0	42264	193	HConF-DS11642.hotspot.twopass.fdr0.01.merge.pks.bed	HConF	eye	peaks	Peaks
194	1e-16	1	1	-1.25832e-16	9006.72	-17653.2	17653.2	0	2229	0	42264	193	HConF-DS11642.hotspot.twopass.fdr0.01.merge.pks.bed	HConF	eye	peaks	Peaks
194	1e-18	1	1	-1.25832e-16	9006.72	-17653.2	17653.2	0	2229	0	42264	193	HConF-DS11642.hotspot.twopass.fdr0.01.merge.pks.bed	HConF	eye	peaks	Peaks
194	1e-20	1	1	-1.25832e-16	9006.72	-17653.2	17653.2	0	2229	0	42264	193	HConF-DS11642.hotspot.twopass.fdr0.01.merge.pks.bed	HConF	eye	peaks	Peaks
195	0.01	1.26658	0.122	0.236322	0.152818	-0.0632005	0.535845	64	3001	750	42264	194	HCPEpiC-DS12447.hotspot.twopass.fdr0.01.merge.pks.bed	HCPEpiC	epithelium	peaks	Peaks
195	0.0001	2.92981	0.0429596	1.07494	0.531069	0.0340429	2.11583	7	3001	36	42264	194	HCPEpiC-DS12447.hotspot.twopass.fdr0.01.merge.pks.bed	HCPEpiC	epithelium	peaks	Peaks
195	1e-06	1.45655e-06	0.997601	-13.4394	4469.64	-8773.94	8747.06	0	3001	3	42264	194	HCPEpiC-DS12447.hotspot.twopass.fdr0.01.merge.pks.bed	HCPEpiC	epithelium	peaks	Peaks
195	1e-08	2.10573e-06	0.997579	-13.0708	4308.43	-8457.6	8431.45	0	3001	2	42264	194	HCPEpiC-DS12447.hotspot.twopass.fdr0.01.merge.pks.bed	HCPEpiC	epithelium	peaks	Peaks
195	1e-10	1	1	-1.30537e-16	7965.78	-15612.9	15612.9	0	3001	0	42264	194	HCPEpiC-DS12447.hotspot.twopass.fdr0.01.merge.pks.bed	HCPEpiC	epithelium	peaks	Peaks
195	1e-12	1	1	-1.30537e-16	7965.78	-15612.9	15612.9	0	3001	0	42264	194	HCPEpiC-DS12447.hotspot.twopass.fdr0.01.merge.pks.bed	HCPEpiC	epithelium	peaks	Peaks
195	1e-14	1	1	-1.30537e-16	7965.78	-15612.9	15612.9	0	3001	0	42264	194	HCPEpiC-DS12447.hotspot.twopass.fdr0.01.merge.pks.bed	HCPEpiC	epithelium	peaks	Peaks
195	1e-16	1	1	-1.30537e-16	7965.78	-15612.9	15612.9	0	3001	0	42264	194	HCPEpiC-DS12447.hotspot.twopass.fdr0.01.merge.pks.bed	HCPEpiC	epithelium	peaks	Peaks
195	1e-18	1	1	-1.30537e-16	7965.78	-15612.9	15612.9	0	3001	0	42264	194	HCPEpiC-DS12447.hotspot.twopass.fdr0.01.merge.pks.bed	HCPEpiC	epithelium	peaks	Peaks
195	1e-20	1	1	-1.30537e-16	7965.78	-15612.9	15612.9	0	3001	0	42264	194	HCPEpiC-DS12447.hotspot.twopass.fdr0.01.merge.pks.bed	HCPEpiC	epithelium	peaks	Peaks
196	0.01	1.32462	0.118327	0.281128	0.179999	-0.0716695	0.633926	40	1821	750	42264	195	HCT116-DS13551.hotspot.twopass.fdr0.01.merge.pks.bed	HCT-116	colon	peaks	Peaks
196	0.0001	2.77306	0.0754276	1.01995	0.573698	-0.104496	2.1444	5	1821	36	42264	195	HCT116-DS13551.hotspot.twopass.fdr0.01.merge.pks.bed	HCT-116	colon	peaks	Peaks
196	1e-06	1.86845e-06	0.998118	-13.1904	5591.87	-10973.3	10946.9	0	1821	3	42264	195	HCT116-DS13551.hotspot.twopass.fdr0.01.merge.pks.bed	HCT-116	colon	peaks	Peaks
196	1e-08	2.69376e-06	0.998105	-12.8246	5399.78	-10596.4	10570.7	0	1821	2	42264	195	HCT116-DS13551.hotspot.twopass.fdr0.01.merge.pks.bed	HCT-116	colon	peaks	Peaks
196	1e-10	1	1	-1.06372e-16	9693.25	-18998.8	18998.8	0	1821	0	42264	195	HCT116-DS13551.hotspot.twopass.fdr0.01.merge.pks.bed	HCT-116	colon	peaks	Peaks
196	1e-12	1	1	-1.06372e-16	9693.25	-18998.8	18998.8	0	1821	0	42264	195	HCT116-DS13551.hotspot.twopass.fdr0.01.merge.pks.bed	HCT-116	colon	peaks	Peaks
196	1e-14	1	1	-1.06372e-16	9693.25	-18998.8	18998.8	0	1821	0	42264	195	HCT116-DS13551.hotspot.twopass.fdr0.01.merge.pks.bed	HCT-116	colon	peaks	Peaks
196	1e-16	1	1	-1.06372e-16	9693.25	-18998.8	18998.8	0	1821	0	42264	195	HCT116-DS13551.hotspot.twopass.fdr0.01.merge.pks.bed	HCT-116	colon	peaks	Peaks
196	1e-18	1	1	-1.06372e-16	9693.25	-18998.8	18998.8	0	1821	0	42264	195	HCT116-DS13551.hotspot.twopass.fdr0.01.merge.pks.bed	HCT-116	colon	peaks	Peaks
196	1e-20	1	1	-1.06372e-16	9693.25	-18998.8	18998.8	0	1821	0	42264	195	HCT116-DS13551.hotspot.twopass.fdr0.01.merge.pks.bed	HCT-116	colon	peaks	Peaks
197	0.01	1.11413	0.488686	0.108073	0.156084	-0.197852	0.413997	63	3190	750	42264	196	HEEpiC-DS12763.hotspot.twopass.fdr0.01.merge.pks.bed	HEEpiC	epithelium	peaks	Peaks
197	0.0001	1.50838	0.476735	0.411038	0.577655	-0.721165	1.54324	5	3190	36	42264	196	HEEpiC-DS12763.hotspot.twopass.fdr0.01.merge.pks.bed	HEEpiC	epithelium	peaks	Peaks
197	1e-06	1.46392e-06	0.997524	-13.4344	4329.7	-8499.64	8472.77	0	3190	3	42264	196	HEEpiC-DS12763.hotspot.twopass.fdr0.01.merge.pks.bed	HEEpiC	epithelium	peaks	Peaks
197	1e-08	1.77751e-06	0.997478	-13.2403	4189.36	-8224.39	8197.91	0	3190	2	42264	196	HEEpiC-DS12763.hotspot.twopass.fdr0.01.merge.pks.bed	HEEpiC	epithelium	peaks	Peaks
197	1e-10	1	1	-8.25019e-17	7858.11	-15401.9	15401.9	0	3190	0	42264	196	HEEpiC-DS12763.hotspot.twopass.fdr0.01.merge.pks.bed	HEEpiC	epithelium	peaks	Peaks
197	1e-12	1	1	-8.25019e-17	7858.11	-15401.9	15401.9	0	3190	0	42264	196	HEEpiC-DS12763.hotspot.twopass.fdr0.01.merge.pks.bed	HEEpiC	epithelium	peaks	Peaks
197	1e-14	1	1	-8.25019e-17	7858.11	-15401.9	15401.9	0	3190	0	42264	196	HEEpiC-DS12763.hotspot.twopass.fdr0.01.merge.pks.bed	HEEpiC	epithelium	peaks	Peaks
197	1e-16	1	1	-8.25019e-17	7858.11	-15401.9	15401.9	0	3190	0	42264	196	HEEpiC-DS12763.hotspot.twopass.fdr0.01.merge.pks.bed	HEEpiC	epithelium	peaks	Peaks
197	1e-18	1	1	-8.25019e-17	7858.11	-15401.9	15401.9	0	3190	0	42264	196	HEEpiC-DS12763.hotspot.twopass.fdr0.01.merge.pks.bed	HEEpiC	epithelium	peaks	Peaks
197	1e-20	1	1	-8.25019e-17	7858.11	-15401.9	15401.9	0	3190	0	42264	196	HEEpiC-DS12763.hotspot.twopass.fdr0.01.merge.pks.bed	HEEpiC	epithelium	peaks	Peaks
198	0.01	1.21261	0.225427	0.192773	0.159024	-0.118915	0.504461	63	2730	750	42264	197	Hela-all.fdr0.01.bed	HeLa-S3	cervix	peaks	Peaks
198	0.0001	1.68124	0.366307	0.519532	0.575077	-0.60762	1.64668	6	2730	36	42264	197	Hela-all.fdr0.01.bed	HeLa-S3	cervix	peaks	Peaks
198	1e-06	1.11341e-06	0.997657	-13.7081	4668.66	-9164.28	9136.86	0	2730	3	42264	197	Hela-all.fdr0.01.bed	HeLa-S3	cervix	peaks	Peaks
198	1e-08	2.62733e-06	0.997701	-12.8495	4459.05	-8752.59	8726.9	0	2730	2	42264	197	Hela-all.fdr0.01.bed	HeLa-S3	cervix	peaks	Peaks
198	1e-10	1	1	-1.40217e-16	8218.52	-16108.3	16108.3	0	2730	0	42264	197	Hela-all.fdr0.01.bed	HeLa-S3	cervix	peaks	Peaks
198	1e-12	1	1	-1.40217e-16	8218.52	-16108.3	16108.3	0	2730	0	42264	197	Hela-all.fdr0.01.bed	HeLa-S3	cervix	peaks	Peaks
198	1e-14	1	1	-1.40217e-16	8218.52	-16108.3	16108.3	0	2730	0	42264	197	Hela-all.fdr0.01.bed	HeLa-S3	cervix	peaks	Peaks
198	1e-16	1	1	-1.40217e-16	8218.52	-16108.3	16108.3	0	2730	0	42264	197	Hela-all.fdr0.01.bed	HeLa-S3	cervix	peaks	Peaks
198	1e-18	1	1	-1.40217e-16	8218.52	-16108.3	16108.3	0	2730	0	42264	197	Hela-all.fdr0.01.bed	HeLa-S3	cervix	peaks	Peaks
198	1e-20	1	1	-1.40217e-16	8218.52	-16108.3	16108.3	0	2730	0	42264	197	Hela-all.fdr0.01.bed	HeLa-S3	cervix	peaks	Peaks
199	0.01	1.44375	0.0156639	0.367245	0.151964	0.0693949	0.665094	64	2622	750	42264	198	HepG2-all.fdr0.01.bed	HepG2	liver	peaks	Peaks
199	0.0001	1.79349	0.303078	0.584164	0.567229	-0.527604	1.69593	5	2622	36	42264	198	HepG2-all.fdr0.01.bed	HepG2	liver	peaks	Peaks
199	1e-06	7.43614e-06	0.997952	-11.8092	4601.55	-9030.85	9007.23	0	2622	3	42264	198	HepG2-all.fdr0.01.bed	HepG2	liver	peaks	Peaks
199	1e-08	7.95977e-06	0.997894	-11.7411	4447.62	-8729.08	8705.59	0	2622	2	42264	198	HepG2-all.fdr0.01.bed	HepG2	liver	peaks	Peaks
199	1e-10	1	1	-1.81826e-16	8236.68	-16143.9	16143.9	0	2622	0	42264	198	HepG2-all.fdr0.01.bed	HepG2	liver	peaks	Peaks
199	1e-12	1	1	-1.81826e-16	8236.68	-16143.9	16143.9	0	2622	0	42264	198	HepG2-all.fdr0.01.bed	HepG2	liver	peaks	Peaks
199	1e-14	1	1	-1.81826e-16	8236.68	-16143.9	16143.9	0	2622	0	42264	198	HepG2-all.fdr0.01.bed	HepG2	liver	peaks	Peaks
199	1e-16	1	1	-1.81826e-16	8236.68	-16143.9	16143.9	0	2622	0	42264	198	HepG2-all.fdr0.01.bed	HepG2	liver	peaks	Peaks
199	1e-18	1	1	-1.81826e-16	8236.68	-16143.9	16143.9	0	2622	0	42264	198	HepG2-all.fdr0.01.bed	HepG2	liver	peaks	Peaks
199	1e-20	1	1	-1.81826e-16	8236.68	-16143.9	16143.9	0	2622	0	42264	198	HepG2-all.fdr0.01.bed	HepG2	liver	peaks	Peaks
200	0.01	1.39272	0.0197869	0.33126	0.142149	0.0526472	0.609873	82	3376	750	42264	199	HESC-all.fdr0.01.bed	HESC	es_cell	peaks	Peaks
200	0.0001	1.87211	0.248006	0.627067	0.542817	-0.436855	1.69099	6	3376	36	42264	199	HESC-all.fdr0.01.bed	HESC	es_cell	peaks	Peaks
200	1e-06	1.44309e-06	0.997446	-13.4487	4201.72	-8248.83	8221.93	0	3376	3	42264	199	HESC-all.fdr0.01.bed	HESC	es_cell	peaks	Peaks
200	1e-08	4.93156e-06	0.997557	-12.2199	3990.83	-7834.24	7809.8	0	3376	2	42264	199	HESC-all.fdr0.01.bed	HESC	es_cell	peaks	Peaks
200	1e-10	1	1	-9.59975e-17	7541.89	-14782.1	14782.1	0	3376	0	42264	199	HESC-all.fdr0.01.bed	HESC	es_cell	peaks	Peaks
200	1e-12	1	1	-9.59975e-17	7541.89	-14782.1	14782.1	0	3376	0	42264	199	HESC-all.fdr0.01.bed	HESC	es_cell	peaks	Peaks
200	1e-14	1	1	-9.59975e-17	7541.89	-14782.1	14782.1	0	3376	0	42264	199	HESC-all.fdr0.01.bed	HESC	es_cell	peaks	Peaks
200	1e-16	1	1	-9.59975e-17	7541.89	-14782.1	14782.1	0	3376	0	42264	199	HESC-all.fdr0.01.bed	HESC	es_cell	peaks	Peaks
[truncated: 8,070 more rows]

## Sheet: Supplementary Table 5
Supplementary Table 5. The results of regulatory element enrichment analysis for CAD in Asian population.
ID	PThresh	OR	Pvalue	Beta	SE	CI95_lower	CI95_upper	NAnnotThesh	NAnnot	NThresh	N	linkID	Annotation	Celltype	Tissue	Type	Category
1	0.01	1.22119	1.98006e-05	0.199829	0.0468299	0.108043	0.291616	565	31632	14738	1102659	0	AG10803_footprints.txt	AG10803	skin	footprints	Footprints
1	0.0001	1.53631	0.0057462	0.429384	0.155465	0.124671	0.734096	49	31632	814	1102659	0	AG10803_footprints.txt	AG10803	skin	footprints	Footprints
1	1e-06	1.44857	0.202473	0.370579	0.290756	-0.199302	0.94046	13	31632	233	1102659	0	AG10803_footprints.txt	AG10803	skin	footprints	Footprints
1	1e-08	1.43884	0.395758	0.363837	0.428436	-0.475898	1.20357	6	31632	98	1102659	0	AG10803_footprints.txt	AG10803	skin	footprints	Footprints
1	1e-10	1.82612	0.328122	0.602191	0.615798	-0.604773	1.80916	3	31632	36	1102659	0	AG10803_footprints.txt	AG10803	skin	footprints	Footprints
1	1e-12	2.99395	0.160013	1.09659	0.780477	-0.433143	2.62633	2	31632	17	1102659	0	AG10803_footprints.txt	AG10803	skin	footprints	Footprints
1	1e-14	1.85518	0.564143	0.617982	1.07158	-1.48232	2.71829	1	31632	11	1102659	0	AG10803_footprints.txt	AG10803	skin	footprints	Footprints
1	1e-16	2.13652e-07	0.993537	-15.3589	1896.12	-3731.76	3701.04	0	31632	9	1102659	0	AG10803_footprints.txt	AG10803	skin	footprints	Footprints
1	1e-18	2.13652e-07	0.993537	-15.3589	1896.12	-3731.76	3701.04	0	31632	9	1102659	0	AG10803_footprints.txt	AG10803	skin	footprints	Footprints
1	1e-20	2.76135e-07	0.993408	-15.1024	1827.91	-3597.8	3567.59	0	31632	7	1102659	0	AG10803_footprints.txt	AG10803	skin	footprints	Footprints
2	0.01	1.14999	0.000905212	0.139753	0.042114	0.0572094	0.222296	713	42217	14738	1102659	1	AoAF_footprints.txt	AoAF	blood_vessel	footprints	Footprints
2	0.0001	1.21591	0.195436	0.195492	0.150998	-0.100465	0.491448	54	42217	814	1102659	1	AoAF_footprints.txt	AoAF	blood_vessel	footprints	Footprints
2	1e-06	1.06767	0.821708	0.0654831	0.290586	-0.504065	0.635031	13	42217	233	1102659	1	AoAF_footprints.txt	AoAF	blood_vessel	footprints	Footprints
2	1e-08	1.06008	0.891637	0.0583418	0.428248	-0.781025	0.897709	6	42217	98	1102659	1	AoAF_footprints.txt	AoAF	blood_vessel	footprints	Footprints
2	1e-10	1.35461	0.62194	0.303513	0.615516	-0.902899	1.50993	3	42217	36	1102659	1	AoAF_footprints.txt	AoAF	blood_vessel	footprints	Footprints
2	1e-12	2.22538	0.305231	0.799929	0.780206	-0.729274	2.32913	2	42217	17	1102659	1	AoAF_footprints.txt	AoAF	blood_vessel	footprints	Footprints
2	1e-14	1.37964	0.763859	0.32182	1.07124	-1.77782	2.42146	1	42217	11	1102659	1	AoAF_footprints.txt	AoAF	blood_vessel	footprints	Footprints
2	1e-16	2.12686e-07	0.992522	-15.3634	1639.16	-3228.12	3197.39	0	42217	9	1102659	1	AoAF_footprints.txt	AoAF	blood_vessel	footprints	Footprints
2	1e-18	2.12686e-07	0.992522	-15.3634	1639.16	-3228.12	3197.39	0	42217	9	1102659	1	AoAF_footprints.txt	AoAF	blood_vessel	footprints	Footprints
2	1e-20	2.7531e-07	0.992374	-15.1054	1580.38	-3112.65	3082.44	0	42217	7	1102659	1	AoAF_footprints.txt	AoAF	blood_vessel	footprints	Footprints
3	0.01	1.27093	6.22252e-05	0.239752	0.059875	0.122397	0.357107	319	16071	14738	1102659	2	CD20+_footprints.txt	CD20+	blood	footprints	Footprints
3	0.0001	1.24661	0.304627	0.220424	0.214721	-0.200429	0.641277	25	16071	814	1102659	2	CD20+_footprints.txt	CD20+	blood	footprints	Footprints
3	1e-06	0.87122	0.762526	-0.137861	0.456242	-1.0321	0.756374	5	16071	233	1102659	2	CD20+_footprints.txt	CD20+	blood	footprints	Footprints
3	1e-08	0.710095	0.634151	-0.342356	0.719398	-1.75238	1.06766	2	16071	98	1102659	2	CD20+_footprints.txt	CD20+	blood	footprints	Footprints
3	1e-10	0.875935	0.896967	-0.132463	1.02293	-2.13741	1.87248	1	16071	36	1102659	2	CD20+_footprints.txt	CD20+	blood	footprints	Footprints
3	1e-12	2.42634	0.401061	0.886384	1.05556	-1.18252	2.95528	1	16071	17	1102659	2	CD20+_footprints.txt	CD20+	blood	footprints	Footprints
3	1e-14	3.24182	0.274958	1.17613	1.07733	-0.935427	3.28769	1	16071	11	1102659	2	CD20+_footprints.txt	CD20+	blood	footprints	Footprints
3	1e-16	4.84937	0.151169	1.57885	1.09992	-0.577002	3.7347	1	16071	9	1102659	2	CD20+_footprints.txt	CD20+	blood	footprints	Footprints
3	1e-18	4.84937	0.151169	1.57885	1.09992	-0.577002	3.7347	1	16071	9	1102659	2	CD20+_footprints.txt	CD20+	blood	footprints	Footprints
3	1e-20	6.23183	0.0995555	1.82967	1.1109	-0.347699	4.00704	1	16071	7	1102659	2	CD20+_footprints.txt	CD20+	blood	footprints	Footprints
4	0.01	1.15129	0.00501058	0.140886	0.0502026	0.0424891	0.239283	476	27255	14738	1102659	3	CD34+_Mobilized_footprints.txt	CD34+	blood	footprints	Footprints
4	0.0001	1.30993	0.115985	0.269973	0.171755	-0.0666666	0.606613	40	27255	814	1102659	3	CD34+_Mobilized_footprints.txt	CD34+	blood	footprints	Footprints
4	1e-06	1.16198	0.647432	0.150125	0.328261	-0.493267	0.793517	10	27255	233	1102659	3	CD34+_Mobilized_footprints.txt	CD34+	blood	footprints	Footprints
4	1e-08	0.963982	0.943393	-0.0366822	0.51661	-1.04924	0.975873	4	27255	98	1102659	3	CD34+_Mobilized_footprints.txt	CD34+	blood	footprints	Footprints
4	1e-10	1.89393	0.300284	0.638655	0.616567	-0.569816	1.84713	3	27255	36	1102659	3	CD34+_Mobilized_footprints.txt	CD34+	blood	footprints	Footprints
4	1e-12	3.29327	0.128184	1.19188	0.783462	-0.343704	2.72747	2	27255	17	1102659	3	CD34+_Mobilized_footprints.txt	CD34+	blood	footprints	Footprints
4	1e-14	4.72573	0.0578233	1.55302	0.818658	-0.0515467	3.15759	2	27255	11	1102659	3	CD34+_Mobilized_footprints.txt	CD34+	blood	footprints	Footprints
4	1e-16	2.86531	0.336558	1.05268	1.09541	-1.09433	3.19968	1	27255	9	1102659	3	CD34+_Mobilized_footprints.txt	CD34+	blood	footprints	Footprints
4	1e-18	2.86531	0.336558	1.05268	1.09541	-1.09433	3.19968	1	27255	9	1102659	3	CD34+_Mobilized_footprints.txt	CD34+	blood	footprints	Footprints
4	1e-20	3.57935	0.25014	1.27518	1.10884	-0.898154	3.44852	1	27255	7	1102659	3	CD34+_Mobilized_footprints.txt	CD34+	blood	footprints	Footprints
5	0.01	0.989924	0.849567	-0.0101266	0.0533906	-0.114772	0.094519	424	30692	14738	1102659	4	fBrain_footprints.txt	fBrain	fetal_brain	footprints	Footprints
5	0.0001	1.01098	0.955377	0.0109221	0.195191	-0.371652	0.393496	32	30692	814	1102659	4	fBrain_footprints.txt	fBrain	fetal_brain	footprints	Footprints
5	1e-06	0.595423	0.254893	-0.518483	0.455391	-1.41105	0.374083	5	30692	233	1102659	4	fBrain_footprints.txt	fBrain	fetal_brain	footprints	Footprints
5	1e-08	0.254919	0.175142	-1.36681	1.00807	-3.34263	0.609009	1	30692	98	1102659	4	fBrain_footprints.txt	fBrain	fetal_brain	footprints	Footprints
5	1e-10	1.06868e-06	0.976279	-13.7491	462.406	-920.064	892.566	0	30692	36	1102659	4	fBrain_footprints.txt	fBrain	fetal_brain	footprints	Footprints
5	1e-12	1.24263e-07	0.993731	-15.9009	2023.85	-3982.64	3950.84	0	30692	17	1102659	4	fBrain_footprints.txt	fBrain	fetal_brain	footprints	Footprints
5	1e-14	1.72547e-07	0.993779	-15.5726	1997.11	-3929.91	3898.76	0	30692	11	1102659	4	fBrain_footprints.txt	fBrain	fetal_brain	footprints	Footprints
5	1e-16	2.31313e-07	0.99377	-15.2795	1956.84	-3850.68	3820.12	0	30692	9	1102659	4	fBrain_footprints.txt	fBrain	fetal_brain	footprints	Footprints
5	1e-18	2.31313e-07	0.99377	-15.2795	1956.84	-3850.68	3820.12	0	30692	9	1102659	4	fBrain_footprints.txt	fBrain	fetal_brain	footprints	Footprints
5	1e-20	2.92165e-07	0.993656	-15.0459	1892.26	-3723.88	3693.79	0	30692	7	1102659	4	fBrain_footprints.txt	fBrain	fetal_brain	footprints	Footprints
6	0.01	1.05361	0.313664	0.0522247	0.0518326	-0.0493673	0.153817	446	28354	14738	1102659	5	fHeart_footprints.txt	fHeart	fetal_heart	footprints	Footprints
6	0.0001	1.23927	0.222859	0.214522	0.175987	-0.130413	0.559457	37	28354	814	1102659	5	fHeart_footprints.txt	fHeart	fetal_heart	footprints	Footprints
6	1e-06	1.42968	0.235819	0.357451	0.301519	-0.233526	0.948428	12	28354	233	1102659	5	fHeart_footprints.txt	fHeart	fetal_heart	footprints	Footprints
6	1e-08	1.53031	0.320635	0.425469	0.428402	-0.414198	1.26514	6	28354	98	1102659	5	fHeart_footprints.txt	fHeart	fetal_heart	footprints	Footprints
6	1e-10	1.23718	0.773029	0.212838	0.737958	-1.23356	1.65924	2	28354	36	1102659	5	fHeart_footprints.txt	fHeart	fetal_heart	footprints	Footprints
6	1e-12	3.31277	0.125659	1.19778	0.782126	-0.335183	2.73075	2	28354	17	1102659	5	fHeart_footprints.txt	fHeart	fetal_heart	footprints	Footprints
6	1e-14	4.78505	0.0555384	1.5655	0.817645	-0.0370881	3.16808	2	28354	11	1102659	5	fHeart_footprints.txt	fHeart	fetal_heart	footprints	Footprints
6	1e-16	7.04707	0.0224269	1.95261	0.855262	0.2763	3.62893	2	28354	9	1102659	5	fHeart_footprints.txt	fHeart	fetal_heart	footprints	Footprints
6	1e-18	7.04707	0.0224269	1.95261	0.855262	0.2763	3.62893	2	28354	9	1102659	5	fHeart_footprints.txt	fHeart	fetal_heart	footprints	Footprints
6	1e-20	9.1111	0.0122926	2.20949	0.882515	0.479764	3.93922	2	28354	7	1102659	5	fHeart_footprints.txt	fHeart	fetal_heart	footprints	Footprints
7	0.01	1.12131	0.0117034	0.1145	0.0454193	0.0254786	0.203522	606	36943	14738	1102659	6	fLung_footprints.txt	fLung	fetal_lung	footprints	Footprints
7	0.0001	1.21049	0.237508	0.191023	0.161714	-0.125936	0.507981	46	36943	814	1102659	6	fLung_footprints.txt	fLung	fetal_lung	footprints	Footprints
7	1e-06	0.553171	0.155581	-0.592089	0.416938	-1.40929	0.225109	6	36943	233	1102659	6	fLung_footprints.txt	fLung	fetal_lung	footprints	Footprints
7	1e-08	0.597324	0.383269	-0.515295	0.59101	-1.67367	0.643085	3	36943	98	1102659	6	fLung_footprints.txt	fLung	fetal_lung	footprints	Footprints
7	1e-10	0.492669	0.48804	-0.707917	1.02089	-2.70886	1.29303	1	36943	36	1102659	6	fLung_footprints.txt	fLung	fetal_lung	footprints	Footprints
7	1e-12	1.20977e-07	0.992968	-15.9277	1807.29	-3558.22	3526.36	0	36943	17	1102659	6	fLung_footprints.txt	fLung	fetal_lung	footprints	Footprints
7	1e-14	1.63364e-07	0.993046	-15.6273	1793.08	-3530.07	3498.81	0	36943	11	1102659	6	fLung_footprints.txt	fLung	fetal_lung	footprints	Footprints
7	1e-16	2.2382e-07	0.993038	-15.3124	1754.98	-3455.07	3424.44	0	36943	9	1102659	6	fLung_footprints.txt	fLung	fetal_lung	footprints	Footprints
7	1e-18	2.2382e-07	0.993038	-15.3124	1754.98	-3455.07	3424.44	0	36943	9	1102659	6	fLung_footprints.txt	fLung	fetal_lung	footprints	Footprints
7	1e-20	2.88663e-07	0.992897	-15.058	1691.38	-3330.16	3300.05	0	36943	7	1102659	6	fLung_footprints.txt	fLung	fetal_lung	footprints	Footprints
8	0.01	1.1915	0.0100159	0.175214	0.0680367	0.0418617	0.308566	244	12994	14738	1102659	7	GM06990_footprints.txt	GM06990	blood	footprints	Footprints
8	0.0001	1.25541	0.333569	0.22746	0.235234	-0.233599	0.68852	20	12994	814	1102659	7	GM06990_footprints.txt	GM06990	blood	footprints	Footprints
8	1e-06	0.853908	0.75601	-0.157932	0.508268	-1.15414	0.838273	4	12994	233	1102659	7	GM06990_footprints.txt	GM06990	blood	footprints	Footprints
8	1e-08	0.427495	0.399581	-0.849812	1.00883	-2.82713	1.1275	1	12994	98	1102659	7	GM06990_footprints.txt	GM06990	blood	footprints	Footprints
8	1e-10	8.22698e-07	0.983457	-14.0107	675.713	-1338.41	1310.39	0	12994	36	1102659	7	GM06990_footprints.txt	GM06990	blood	footprints	Footprints
8	1e-12	1.12682e-07	0.995632	-15.9987	2922.12	-5743.36	5711.36	0	12994	17	1102659	7	GM06990_footprints.txt	GM06990	blood	footprints	Footprints
8	1e-14	1.43414e-07	0.995716	-15.7575	2935.07	-5768.5	5736.99	0	12994	11	1102659	7	GM06990_footprints.txt	GM06990	blood	footprints	Footprints
8	1e-16	2.2312e-07	0.995715	-15.3156	2851.76	-5604.76	5574.13	0	12994	9	1102659	7	GM06990_footprints.txt	GM06990	blood	footprints	Footprints
8	1e-18	2.2312e-07	0.995715	-15.3156	2851.76	-5604.76	5574.13	0	12994	9	1102659	7	GM06990_footprints.txt	GM06990	blood	footprints	Footprints
8	1e-20	3.09967e-07	0.995595	-14.9868	2714.43	-5335.27	5305.3	0	12994	7	1102659	7	GM06990_footprints.txt	GM06990	blood	footprints	Footprints
9	0.01	1.17094	0.00278775	0.157806	0.0527741	0.054369	0.261243	421	23785	14738	1102659	8	GM12865_footprints.txt	GM12865	blood	footprints	Footprints
9	0.0001	1.43501	0.0379479	0.361168	0.174022	0.0200851	0.702252	39	23785	814	1102659	8	GM12865_footprints.txt	GM12865	blood	footprints	Footprints
9	1e-06	1.31434	0.405259	0.273332	0.328419	-0.37037	0.917035	10	23785	233	1102659	8	GM12865_footprints.txt	GM12865	blood	footprints	Footprints
9	1e-08	1.08749	0.871087	0.0838736	0.51685	-0.929152	1.0969	4	23785	98	1102659	8	GM12865_footprints.txt	GM12865	blood	footprints	Footprints
9	1e-10	1.37017	0.66998	0.314934	0.738978	-1.13346	1.76333	2	23785	36	1102659	8	GM12865_footprints.txt	GM12865	blood	footprints	Footprints
9	1e-12	3.78575	0.0900499	1.33124	0.785333	-0.208007	2.8705	2	23785	17	1102659	8	GM12865_footprints.txt	GM12865	blood	footprints	Footprints
9	1e-14	5.40671	0.0397437	1.68764	0.820676	0.0791152	3.29617	2	23785	11	1102659	8	GM12865_footprints.txt	GM12865	blood	footprints	Footprints
9	1e-16	8.26887	0.0137694	2.1125	0.857615	0.431573	3.79342	2	23785	9	1102659	8	GM12865_footprints.txt	GM12865	blood	footprints	Footprints
9	1e-18	8.26887	0.0137694	2.1125	0.857615	0.431573	3.79342	2	23785	9	1102659	8	GM12865_footprints.txt	GM12865	blood	footprints	Footprints
9	1e-20	10.8271	0.00701752	2.38205	0.883546	0.6503	4.1138	2	23785	7	1102659	8	GM12865_footprints.txt	GM12865	blood	footprints	Footprints
10	0.01	1.16242	0.000594066	0.150504	0.0438237	0.0646098	0.236399	661	39401	14738	1102659	9	H7-hESC_footprints.txt	H7-hESC	es_cell	footprints	Footprints
10	0.0001	1.373	0.0358478	0.316995	0.151047	0.0209426	0.613048	53	39401	814	1102659	9	H7-hESC_footprints.txt	H7-hESC	es_cell	footprints	Footprints
10	1e-06	1.41167	0.205795	0.344775	0.272503	-0.189332	0.878881	15	39401	233	1102659	9	H7-hESC_footprints.txt	H7-hESC	es_cell	footprints	Footprints
10	1e-08	1.20859	0.658182	0.189458	0.428226	-0.649866	1.02878	6	39401	98	1102659	9	H7-hESC_footprints.txt	H7-hESC	es_cell	footprints	Footprints
10	1e-10	0.985929	0.984671	-0.0141711	0.737563	-1.4598	1.43145	2	39401	36	1102659	9	H7-hESC_footprints.txt	H7-hESC	es_cell	footprints	Footprints
10	1e-12	1.12864	0.908178	0.121016	1.04925	-1.9355	2.17754	1	39401	17	1102659	9	H7-hESC_footprints.txt	H7-hESC	es_cell	footprints	Footprints
10	1e-14	1.65496e-07	0.992863	-15.6143	1745.58	-3436.94	3405.71	0	39401	11	1102659	9	H7-hESC_footprints.txt	H7-hESC	es_cell	footprints	Footprints
10	1e-16	2.23017e-07	0.992856	-15.316	1710.53	-3367.96	3337.32	0	39401	9	1102659	9	H7-hESC_footprints.txt	H7-hESC	es_cell	footprints	Footprints
10	1e-18	2.23017e-07	0.992856	-15.316	1710.53	-3367.96	3337.32	0	39401	9	1102659	9	H7-hESC_footprints.txt	H7-hESC	es_cell	footprints	Footprints
10	1e-20	2.84321e-07	0.992713	-15.0732	1650.42	-3249.9	3219.76	0	39401	7	1102659	9	H7-hESC_footprints.txt	H7-hESC	es_cell	footprints	Footprints
11	0.01	1.09908	0.0318887	0.0944762	0.0440283	0.00818061	0.180772	665	39984	14738	1102659	10	HAEpiC_footprints.txt	HAEpiC	epithelium	footprints	Footprints
11	0.0001	1.49213	0.00500858	0.400202	0.142599	0.120707	0.679696	63	39984	814	1102659	10	HAEpiC_footprints.txt	HAEpiC	epithelium	footprints	Footprints
11	1e-06	1.32409	0.303471	0.280723	0.272807	-0.253978	0.815424	16	39984	233	1102659	10	HAEpiC_footprints.txt	HAEpiC	epithelium	footprints	Footprints
11	1e-08	1.124	0.785076	0.116891	0.428626	-0.723216	0.956997	7	39984	98	1102659	10	HAEpiC_footprints.txt	HAEpiC	epithelium	footprints	Footprints
11	1e-10	1.9849	0.208939	0.685568	0.545622	-0.383852	1.75499	5	39984	36	1102659	10	HAEpiC_footprints.txt	HAEpiC	epithelium	footprints	Footprints
11	1e-12	2.3074	0.283931	0.83612	0.780304	-0.693277	2.36552	3	39984	17	1102659	10	HAEpiC_footprints.txt	HAEpiC	epithelium	footprints	Footprints
11	1e-14	1.43106	0.73796	0.358416	1.07132	-1.74137	2.4582	2	39984	11	1102659	10	HAEpiC_footprints.txt	HAEpiC	epithelium	footprints	Footprints
11	1e-16	2.06668e-07	0.992739	-15.3922	1691.38	-3330.5	3299.72	1	39984	9	1102659	10	HAEpiC_footprints.txt	HAEpiC	epithelium	footprints	Footprints
11	1e-18	2.06668e-07	0.992739	-15.3922	1691.38	-3330.5	3299.72	1	39984	9	1102659	10	HAEpiC_footprints.txt	HAEpiC	epithelium	footprints	Footprints
11	1e-20	2.64818e-07	0.992596	-15.1442	1631.98	-3213.82	3183.53	1	39984	7	1102659	10	HAEpiC_footprints.txt	HAEpiC	epithelium	footprints	Footprints
12	0.01	1.21045	0.000130107	0.190994	0.0499166	0.0931572	0.28883	475	27105	14738	1102659	11	HA-h_footprints.txt	HA-h	brain_hippocampus	footprints	Footprints
12	0.0001	1.70521	0.000683619	0.533685	0.157148	0.225675	0.841696	46	27105	814	1102659	11	HA-h_footprints.txt	HA-h	brain_hippocampus	footprints	Footprints
12	1e-06	1.76715	0.0430829	0.569369	0.281461	0.0177055	1.12103	14	27105	233	1102659	11	HA-h_footprints.txt	HA-h	brain_hippocampus	footprints	Footprints
12	1e-08	2.20288	0.0363953	0.789766	0.37743	0.0500033	1.52953	8	27105	98	1102659	11	HA-h_footprints.txt	HA-h	brain_hippocampus	footprints	Footprints
12	1e-10	2.81309	0.0581287	1.03428	0.545875	-0.0356314	2.1042	4	27105	36	1102659	11	HA-h_footprints.txt	HA-h	brain_hippocampus	footprints	Footprints
12	1e-12	5.79218	0.00917602	1.75651	0.674174	0.435129	3.07789	3	27105	17	1102659	11	HA-h_footprints.txt	HA-h	brain_hippocampus	footprints	Footprints
12	1e-14	4.94959	0.0505223	1.59931	0.817843	-0.00366785	3.20228	2	27105	11	1102659	11	HA-h_footprints.txt	HA-h	brain_hippocampus	footprints	Footprints
12	1e-16	2.95025	0.32303	1.08189	1.09475	-1.06382	3.2276	1	27105	9	1102659	11	HA-h_footprints.txt	HA-h	brain_hippocampus	footprints	Footprints
12	1e-18	2.95025	0.32303	1.08189	1.09475	-1.06382	3.2276	1	27105	9	1102659	11	HA-h_footprints.txt	HA-h	brain_hippocampus	footprints	Footprints
12	1e-20	3.63586	0.243871	1.29085	1.10767	-0.880196	3.46189	1	27105	7	1102659	11	HA-h_footprints.txt	HA-h	brain_hippocampus	footprints	Footprints
13	0.01	1.22843	1.15042e-05	0.205741	0.0469002	0.113816	0.297665	553	30541	14738	1102659	12	HCF_footprints.txt	HCF	heart	footprints	Footprints
13	0.0001	1.4975	0.0101323	0.403795	0.157041	0.095996	0.711595	48	30541	814	1102659	12	HCF_footprints.txt	HCF	heart	footprints	Footprints
13	1e-06	1.43929	0.210547	0.36415	0.29084	-0.205896	0.934196	13	30541	233	1102659	12	HCF_footprints.txt	HCF	heart	footprints	Footprints
13	1e-08	1.95061	0.0765465	0.668143	0.377251	-0.0712681	1.40755	8	30541	98	1102659	12	HCF_footprints.txt	HCF	heart	footprints	Footprints
13	1e-10	2.50677	0.0920999	0.918997	0.545585	-0.15035	1.98834	4	30541	36	1102659	12	HCF_footprints.txt	HCF	heart	footprints	Footprints
13	1e-12	5.12518	0.0151862	1.63417	0.673076	0.314937	2.95339	3	30541	17	1102659	12	HCF_footprints.txt	HCF	heart	footprints	Footprints
13	1e-14	4.37853	0.0705949	1.47671	0.816733	-0.124082	3.07751	2	30541	11	1102659	12	HCF_footprints.txt	HCF	heart	footprints	Footprints
13	1e-16	2.57558	0.387218	0.946074	1.09414	-1.19844	3.09059	1	30541	9	1102659	12	HCF_footprints.txt	HCF	heart	footprints	Footprints
13	1e-18	2.57558	0.387218	0.946074	1.09414	-1.19844	3.09059	1	30541	9	1102659	12	HCF_footprints.txt	HCF	heart	footprints	Footprints
13	1e-20	3.21492	0.291732	1.1678	1.10763	-1.00315	3.33875	1	30541	7	1102659	12	HCF_footprints.txt	HCF	heart	footprints	Footprints
14	0.01	1.17461	0.000453618	0.160936	0.0458933	0.0709854	0.250887	585	33500	14738	1102659	13	HCM_footprints.txt	HCM	heart	footprints	Footprints
14	0.0001	1.40313	0.029284	0.338702	0.155393	0.034131	0.643273	50	33500	814	1102659	13	HCM_footprints.txt	HCM	heart	footprints	Footprints
14	1e-06	1.54264	0.111778	0.433497	0.272597	-0.100792	0.967787	15	33500	233	1102659	13	HCM_footprints.txt	HCM	heart	footprints	Footprints
14	1e-08	2.8732	0.000908042	1.05543	0.318132	0.431887	1.67897	12	33500	98	1102659	13	HCM_footprints.txt	HCM	heart	footprints	Footprints
14	1e-10	4.66276	0.000490605	1.53961	0.441676	0.673924	2.40529	7	33500	36	1102659	13	HCM_footprints.txt	HCM	heart	footprints	Footprints
14	1e-12	10.0219	8.53851e-05	2.30477	0.586641	1.15496	3.45459	5	33500	17	1102659	13	HCM_footprints.txt	HCM	heart	footprints	Footprints
14	1e-14	7.11344	0.00667203	1.96199	0.723237	0.544442	3.37953	3	33500	11	1102659	13	HCM_footprints.txt	HCM	heart	footprints	Footprints
14	1e-16	5.79934	0.0394573	1.75774	0.853528	0.0848288	3.43066	2	33500	9	1102659	13	HCM_footprints.txt	HCM	heart	footprints	Footprints
14	1e-18	5.79934	0.0394573	1.75774	0.853528	0.0848288	3.43066	2	33500	9	1102659	13	HCM_footprints.txt	HCM	heart	footprints	Footprints
14	1e-20	7.48725	0.0222266	2.0132	0.880484	0.287454	3.73895	2	33500	7	1102659	13	HCM_footprints.txt	HCM	heart	footprints	Footprints
15	0.01	1.14288	0.00292846	0.133551	0.0448889	0.045569	0.221534	622	36655	14738	1102659	14	HCPEpiC_footprints.txt	HCPEpiC	epithelium	footprints	Footprints
15	0.0001	1.23466	0.183998	0.210796	0.158667	-0.100191	0.521784	47	36655	814	1102659	14	HCPEpiC_footprints.txt	HCPEpiC	epithelium	footprints	Footprints
15	1e-06	1.11847	0.71053	0.111964	0.301673	-0.479316	0.703244	12	36655	233	1102659	14	HCPEpiC_footprints.txt	HCPEpiC	epithelium	footprints	Footprints
15	1e-08	1.20831	0.658895	0.18922	0.428643	-0.65092	1.02936	6	36655	98	1102659	14	HCPEpiC_footprints.txt	HCPEpiC	epithelium	footprints	Footprints
15	1e-10	1.53067	0.489579	0.425708	0.616095	-0.781838	1.63325	3	36655	36	1102659	14	HCPEpiC_footprints.txt	HCPEpiC	epithelium	footprints	Footprints
15	1e-12	2.54173	0.232494	0.932846	0.781305	-0.598511	2.4642	2	36655	17	1102659	14	HCPEpiC_footprints.txt	HCPEpiC	epithelium	footprints	Footprints
15	1e-14	1.57238	0.672952	0.452593	1.07224	-1.649	2.55418	1	36655	11	1102659	14	HCPEpiC_footprints.txt	HCPEpiC	epithelium	footprints	Footprints
15	1e-16	2.10301e-07	0.993025	-15.3747	1758.72	-3462.47	3431.72	0	36655	9	1102659	14	HCPEpiC_footprints.txt	HCPEpiC	epithelium	footprints	Footprints
15	1e-18	2.10301e-07	0.993025	-15.3747	1758.72	-3462.47	3431.72	0	36655	9	1102659	14	HCPEpiC_footprints.txt	HCPEpiC	epithelium	footprints	Footprints
15	1e-20	2.72224e-07	0.992883	-15.1166	1694.68	-3336.69	3306.46	0	36655	7	1102659	14	HCPEpiC_footprints.txt	HCPEpiC	epithelium	footprints	Footprints
16	0.01	1.12131	0.00981899	0.114496	0.0443417	0.0275867	0.201406	644	38555	14738	1102659	15	HEEpiC_footprints.txt	HEEpiC	epithelium	footprints	Footprints
16	0.0001	1.08841	0.605148	0.0847145	0.163854	-0.236439	0.405868	43	38555	814	1102659	15	HEEpiC_footprints.txt	HEEpiC	epithelium	footprints	Footprints
16	1e-06	1.26544	0.402966	0.235422	0.281492	-0.316303	0.787147	15	38555	233	1102659	15	HEEpiC_footprints.txt	HEEpiC	epithelium	footprints	Footprints
16	1e-08	1.15686	0.734008	0.145705	0.428798	-0.694739	0.98615	7	38555	98	1102659	15	HEEpiC_footprints.txt	HEEpiC	epithelium	footprints	Footprints
16	1e-10	2.03789	0.192297	0.711914	0.546024	-0.358293	1.78212	5	38555	36	1102659	15	HEEpiC_footprints.txt	HEEpiC	epithelium	footprints	Footprints
16	1e-12	4.08146	0.0366123	1.40645	0.672925	0.0875215	2.72539	4	38555	17	1102659	15	HEEpiC_footprints.txt	HEEpiC	epithelium	footprints	Footprints
16	1e-14	3.52162	0.123415	1.25892	0.817164	-0.342721	2.86056	3	38555	11	1102659	15	HEEpiC_footprints.txt	HEEpiC	epithelium	footprints	Footprints
16	1e-16	2.03094	0.517421	0.708498	1.0945	-1.43672	2.85372	2	38555	9	1102659	15	HEEpiC_footprints.txt	HEEpiC	epithelium	footprints	Footprints
16	1e-18	2.03094	0.517421	0.708498	1.0945	-1.43672	2.85372	2	38555	9	1102659	15	HEEpiC_footprints.txt	HEEpiC	epithelium	footprints	Footprints
16	1e-20	2.49501	0.409271	0.914294	1.108	-1.25738	3.08597	1	38555	7	1102659	15	HEEpiC_footprints.txt	HEEpiC	epithelium	footprints	Footprints
17	0.01	1.23269	0.00127948	0.209196	0.0649567	0.0818806	0.336511	262	13950	14738	1102659	16	HepG2_footprints.txt	HepG2	liver	footprints	Footprints
17	0.0001	1.51201	0.0495521	0.413441	0.21053	0.000802193	0.826079	26	13950	814	1102659	16	HepG2_footprints.txt	HepG2	liver	footprints	Footprints
17	1e-06	0.601967	0.385056	-0.507552	0.584321	-1.65282	0.637717	3	13950	233	1102659	16	HepG2_footprints.txt	HepG2	liver	footprints	Footprints
17	1e-08	0.405988	0.371497	-0.901432	1.00868	-2.87845	1.07559	1	13950	98	1102659	16	HepG2_footprints.txt	HepG2	liver	footprints	Footprints
17	1e-10	8.44082e-07	0.982877	-13.985	651.615	-1291.15	1263.18	0	13950	36	1102659	16	HepG2_footprints.txt	HepG2	liver	footprints	Footprints
17	1e-12	1.13525e-07	0.995481	-15.9912	2823.73	-5550.51	5518.53	0	13950	17	1102659	16	HepG2_footprints.txt	HepG2	liver	footprints	Footprints
17	1e-14	1.45326e-07	0.995565	-15.7443	2832.67	-5567.78	5536.29	0	13950	11	1102659	16	HepG2_footprints.txt	HepG2	liver	footprints	Footprints
17	1e-16	2.19571e-07	0.995556	-15.3316	2752.68	-5410.59	5379.93	0	13950	9	1102659	16	HepG2_footprints.txt	HepG2	liver	footprints	Footprints
17	1e-18	2.19571e-07	0.995556	-15.3316	2752.68	-5410.59	5379.93	0	13950	9	1102659	16	HepG2_footprints.txt	HepG2	liver	footprints	Footprints
17	1e-20	3.0379e-07	0.99544	-15.0069	2625.92	-5161.81	5131.8	0	13950	7	1102659	16	HepG2_footprints.txt	HepG2	liver	footprints	Footprints
18	0.01	1.2314	0.00053417	0.208151	0.0601069	0.0903413	0.32596	330	17636	14738	1102659	17	HFF_footprints.txt	HFF	foreskin	footprints	Footprints
18	0.0001	1.66966	0.00676792	0.512622	0.189296	0.141603	0.883642	31	17636	814	1102659	17	HFF_footprints.txt	HFF	foreskin	footprints	Footprints
18	1e-06	1.46905	0.291168	0.384613	0.364368	-0.329548	1.09877	8	17636	233	1102659	17	HFF_footprints.txt	HFF	foreskin	footprints	Footprints
18	1e-08	1.97058	0.145616	0.67833	0.466145	-0.235314	1.59197	5	17636	98	1102659	17	HFF_footprints.txt	HFF	foreskin	footprints	Footprints
18	1e-10	4.21973	0.00846575	1.43977	0.546837	0.36797	2.51157	4	17636	36	1102659	17	HFF_footprints.txt	HFF	foreskin	footprints	Footprints
18	1e-12	5.25274	0.0343212	1.65875	0.783806	0.122492	3.19501	2	17636	17	1102659	17	HFF_footprints.txt	HFF	foreskin	footprints	Footprints
18	1e-14	3.19751	0.279109	1.16237	1.07396	-0.94259	3.26733	1	17636	11	1102659	17	HFF_footprints.txt	HFF	foreskin	footprints	Footprints
18	1e-16	2.17324e-07	0.995122	-15.3419	2509.65	-4934.26	4903.57	0	17636	9	1102659	17	HFF_footprints.txt	HFF	foreskin	footprints	Footprints
18	1e-18	2.17324e-07	0.995122	-15.3419	2509.65	-4934.26	4903.57	0	17636	9	1102659	17	HFF_footprints.txt	HFF	foreskin	footprints	Footprints
18	1e-20	2.87311e-07	0.99501	-15.0627	2408.45	-4735.62	4705.49	0	17636	7	1102659	17	HFF_footprints.txt	HFF	foreskin	footprints	Footprints
19	0.01	1.13852	0.00620044	0.129732	0.0473996	0.0368289	0.222635	564	32670	14738	1102659	18	HIPEpiC_footprints.txt	HIPEpiC	epithelium	footprints	Footprints
19	0.0001	1.21656	0.242437	0.196029	0.167701	-0.132666	0.524723	43	32670	814	1102659	18	HIPEpiC_footprints.txt	HIPEpiC	epithelium	footprints	Footprints
19	1e-06	1.25934	0.445056	0.230587	0.30194	-0.361216	0.822389	12	32670	233	1102659	18	HIPEpiC_footprints.txt	HIPEpiC	epithelium	footprints	Footprints
19	1e-08	1.61469	0.231632	0.479142	0.400565	-0.305965	1.26425	7	32670	98	1102659	18	HIPEpiC_footprints.txt	HIPEpiC	epithelium	footprints	Footprints
19	1e-10	1.70489	0.386953	0.533499	0.616651	-0.675137	1.74214	3	32670	36	1102659	18	HIPEpiC_footprints.txt	HIPEpiC	epithelium	footprints	Footprints
19	1e-12	2.83406	0.182749	1.04171	0.781867	-0.490749	2.57417	2	32670	17	1102659	18	HIPEpiC_footprints.txt	HIPEpiC	epithelium	footprints	Footprints
19	1e-14	1.74957	0.60212	0.559368	1.07291	-1.54354	2.66228	1	32670	11	1102659	18	HIPEpiC_footprints.txt	HIPEpiC	epithelium	footprints	Footprints
19	1e-16	2.07489e-07	0.99342	-15.3882	1865.93	-3672.61	3641.83	0	32670	9	1102659	18	HIPEpiC_footprints.txt	HIPEpiC	epithelium	footprints	Footprints
19	1e-18	2.07489e-07	0.99342	-15.3882	1865.93	-3672.61	3641.83	0	32670	9	1102659	18	HIPEpiC_footprints.txt	HIPEpiC	epithelium	footprints	Footprints
19	1e-20	2.66772e-07	0.993288	-15.1369	1799.36	-3541.87	3511.6	0	32670	7	1102659	18	HIPEpiC_footprints.txt	HIPEpiC	epithelium	footprints	Footprints
20	0.01	1.1775	0.000158915	0.16339	0.0432625	0.0785952	0.248184	674	38935	14738	1102659	19	HMF_footprints.txt	HMF	breast	footprints	Footprints
20	0.0001	1.29242	0.0925065	0.256518	0.152479	-0.04234	0.555376	54	38935	814	1102659	19	HMF_footprints.txt	HMF	breast	footprints	Footprints
20	1e-06	1.35989	0.259508	0.307407	0.272631	-0.226951	0.841764	15	38935	233	1102659	19	HMF_footprints.txt	HMF	breast	footprints	Footprints
20	1e-08	1.59073	0.218413	0.464191	0.377158	-0.27504	1.20342	8	38935	98	1102659	19	HMF_footprints.txt	HMF	breast	footprints	Footprints
20	1e-10	2.0514	0.187613	0.718523	0.545296	-0.350258	1.7873	4	38935	36	1102659	19	HMF_footprints.txt	HMF	breast	footprints	Footprints
20	1e-12	4.05957	0.0369776	1.40108	0.671653	0.084636	2.71752	3	38935	17	1102659	19	HMF_footprints.txt	HMF	breast	footprints	Footprints
20	1e-14	3.50772	0.123994	1.25497	0.815855	-0.344108	2.85404	2	38935	11	1102659	19	HMF_footprints.txt	HMF	breast	footprints	Footprints
20	1e-16	2.03233	0.516418	0.709185	1.09294	-1.43298	2.85135	1	38935	9	1102659	19	HMF_footprints.txt	HMF	breast	footprints	Footprints
20	1e-18	2.03233	0.516418	0.709185	1.09294	-1.43298	2.85135	1	38935	9	1102659	19	HMF_footprints.txt	HMF	breast	footprints	Footprints
20	1e-20	2.51024	0.405564	0.920378	1.10659	-1.24854	3.08929	1	38935	7	1102659	19	HMF_footprints.txt	HMF	breast	footprints	Footprints
21	0.01	1.19321	0.000254253	0.176643	0.0482904	0.0819942	0.271293	530	29348	14738	1102659	20	HMVEC-dBl-Ad_footprints.txt	HMVEC-dBl-Ad	blood_vessel	footprints	Footprints
21	0.0001	1.58639	0.00302465	0.461464	0.155625	0.156438	0.766489	49	29348	814	1102659	20	HMVEC-dBl-Ad_footprints.txt	HMVEC-dBl-Ad	blood_vessel	footprints	Footprints
21	1e-06	1.74353	0.0417215	0.55591	0.273002	0.0208265	1.09099	15	29348	233	1102659	20	HMVEC-dBl-Ad_footprints.txt	HMVEC-dBl-Ad	blood_vessel	footprints	Footprints
21	1e-08	2.30842	0.0198126	0.836565	0.35906	0.132808	1.54032	9	29348	98	1102659	20	HMVEC-dBl-Ad_footprints.txt	HMVEC-dBl-Ad	blood_vessel	footprints	Footprints
21	1e-10	3.39132	0.0146245	1.22122	0.500182	0.240862	2.20158	5	29348	36	1102659	20	HMVEC-dBl-Ad_footprints.txt	HMVEC-dBl-Ad	blood_vessel	footprints	Footprints
21	1e-12	5.32065	0.0131797	1.6716	0.674336	0.349897	2.99329	3	29348	17	1102659	20	HMVEC-dBl-Ad_footprints.txt	HMVEC-dBl-Ad	blood_vessel	footprints	Footprints
21	1e-14	8.14978	0.00382657	2.09799	0.725417	0.676173	3.51981	3	29348	11	1102659	20	HMVEC-dBl-Ad_footprints.txt	HMVEC-dBl-Ad	blood_vessel	footprints	Footprints
21	1e-16	6.57385	0.0277478	1.8831	0.85563	0.206065	3.56014	2	29348	9	1102659	20	HMVEC-dBl-Ad_footprints.txt	HMVEC-dBl-Ad	blood_vessel	footprints	Footprints
21	1e-18	6.57385	0.0277478	1.8831	0.85563	0.206065	3.56014	2	29348	9	1102659	20	HMVEC-dBl-Ad_footprints.txt	HMVEC-dBl-Ad	blood_vessel	footprints	Footprints
21	1e-20	8.49493	0.0152509	2.13947	0.881759	0.411221	3.86772	2	29348	7	1102659	20	HMVEC-dBl-Ad_footprints.txt	HMVEC-dBl-Ad	blood_vessel	footprints	Footprints
22	0.01	1.25555	1.01634e-06	0.227574	0.0465535	0.13633	0.318819	561	29789	14738	1102659	21	HMVEC-dBl-Neo_footprints.txt	HMVEC-dBl-Neo	blood_vessel	footprints	Footprints
22	0.0001	1.7861	7.23203e-05	0.580032	0.146158	0.293562	0.866503	55	29789	814	1102659	21	HMVEC-dBl-Neo_footprints.txt	HMVEC-dBl-Neo	blood_vessel	footprints	Footprints
22	1e-06	2.18215	0.00152692	0.78031	0.246192	0.297774	1.26285	19	29789	233	1102659	21	HMVEC-dBl-Neo_footprints.txt	HMVEC-dBl-Neo	blood_vessel	footprints	Footprints
22	1e-08	2.48255	0.00809127	0.909286	0.343355	0.23631	1.58226	10	29789	98	1102659	21	HMVEC-dBl-Neo_footprints.txt	HMVEC-dBl-Neo	blood_vessel	footprints	Footprints
22	1e-10	3.24092	0.0186824	1.17586	0.49998	0.195897	2.15582	5	29789	36	1102659	21	HMVEC-dBl-Neo_footprints.txt	HMVEC-dBl-Neo	blood_vessel	footprints	Footprints
22	1e-12	5.16727	0.015003	1.64234	0.675221	0.318911	2.96578	3	29789	17	1102659	21	HMVEC-dBl-Neo_footprints.txt	HMVEC-dBl-Neo	blood_vessel	footprints	Footprints
22	1e-14	4.36825	0.0716127	1.47436	0.818375	-0.129653	3.07838	2	29789	11	1102659	21	HMVEC-dBl-Neo_footprints.txt	HMVEC-dBl-Neo	blood_vessel	footprints	Footprints
22	1e-16	2.58449	0.385893	0.949529	1.09508	-1.19682	3.09588	1	29789	9	1102659	21	HMVEC-dBl-Neo_footprints.txt	HMVEC-dBl-Neo	blood_vessel	footprints	Footprints
22	1e-18	2.58449	0.385893	0.949529	1.09508	-1.19682	3.09588	1	29789	9	1102659	21	HMVEC-dBl-Neo_footprints.txt	HMVEC-dBl-Neo	blood_vessel	footprints	Footprints
22	1e-20	3.253	0.287168	1.17958	1.10826	-0.992607	3.35176	1	29789	7	1102659	21	HMVEC-dBl-Neo_footprints.txt	HMVEC-dBl-Neo	blood_vessel	footprints	Footprints
23	0.01	1.27078	4.88181e-07	0.23963	0.0476316	0.146272	0.332988	534	28257	14738	1102659	22	HMVEC-dLy-Neo_footprints.txt	HMVEC-dLy-Neo	blood_vessel	footprints	Footprints
23	0.0001	1.46878	0.0177421	0.384432	0.162142	0.0666336	0.702231	44	28257	814	1102659	22	HMVEC-dLy-Neo_footprints.txt	HMVEC-dLy-Neo	blood_vessel	footprints	Footprints
23	1e-06	1.52058	0.150023	0.41909	0.291146	-0.151555	0.989736	13	28257	233	1102659	22	HMVEC-dLy-Neo_footprints.txt	HMVEC-dLy-Neo	blood_vessel	footprints	Footprints
23	1e-08	2.34948	0.0173625	0.854192	0.359064	0.150426	1.55796	9	28257	98	1102659	22	HMVEC-dLy-Neo_footprints.txt	HMVEC-dLy-Neo	blood_vessel	footprints	Footprints
23	1e-10	3.47984	0.0126734	1.24699	0.500232	0.266532	2.22744	5	28257	36	1102659	22	HMVEC-dLy-Neo_footprints.txt	HMVEC-dLy-Neo	blood_vessel	footprints	Footprints
23	1e-12	5.46873	0.0118312	1.69905	0.674991	0.376064	3.02203	3	28257	17	1102659	22	HMVEC-dLy-Neo_footprints.txt	HMVEC-dLy-Neo	blood_vessel	footprints	Footprints
23	1e-14	8.33721	0.00348536	2.12073	0.725945	0.697876	3.54358	3	28257	11	1102659	22	HMVEC-dLy-Neo_footprints.txt	HMVEC-dLy-Neo	blood_vessel	footprints	Footprints
23	1e-16	13.1308	0.00103186	2.57496	0.784643	1.03706	4.11286	3	28257	9	1102659	22	HMVEC-dLy-Neo_footprints.txt	HMVEC-dLy-Neo	blood_vessel	footprints	Footprints
23	1e-18	13.1308	0.00103186	2.57496	0.784643	1.03706	4.11286	3	28257	9	1102659	22	HMVEC-dLy-Neo_footprints.txt	HMVEC-dLy-Neo	blood_vessel	footprints	Footprints
23	1e-20	18.1002	0.000516918	2.89593	0.83412	1.26105	4.5308	3	28257	7	1102659	22	HMVEC-dLy-Neo_footprints.txt	HMVEC-dLy-Neo	blood_vessel	footprints	Footprints
24	0.01	1.26907	2.01593e-06	0.238281	0.0501452	0.139996	0.336566	468	25050	14738	1102659	23	HMVEC-LLy_footprints.txt	HMVEC-LLy	blood_vessel	footprints	Footprints
24	0.0001	1.51403	0.0134247	0.414775	0.167769	0.0859478	0.743601	42	25050	814	1102659	23	HMVEC-LLy_footprints.txt	HMVEC-LLy	blood_vessel	footprints	Footprints
24	1e-06	1.13773	0.708276	0.129036	0.344856	-0.546882	0.804954	9	25050	233	1102659	23	HMVEC-LLy_footprints.txt	HMVEC-LLy	blood_vessel	footprints	Footprints
24	1e-08	1.34708	0.522779	0.297941	0.466212	-0.615834	1.21172	5	25050	98	1102659	23	HMVEC-LLy_footprints.txt	HMVEC-LLy	blood_vessel	footprints	Footprints
24	1e-10	2.07426	0.237034	0.729603	0.617035	-0.479787	1.93899	3	25050	36	1102659	23	HMVEC-LLy_footprints.txt	HMVEC-LLy	blood_vessel	footprints	Footprints
24	1e-12	3.6276	0.10021	1.28857	0.783882	-0.247837	2.82498	2	25050	17	1102659	23	HMVEC-LLy_footprints.txt	HMVEC-LLy	blood_vessel	footprints	Footprints
24	1e-14	5.16853	0.0450028	1.64259	0.819398	0.0365681	3.24861	2	25050	11	1102659	23	HMVEC-LLy_footprints.txt	HMVEC-LLy	blood_vessel	footprints	Footprints
24	1e-16	3.07473	0.305593	1.12322	1.09634	-1.02562	3.27205	1	25050	9	1102659	23	HMVEC-LLy_footprints.txt	HMVEC-LLy	blood_vessel	footprints	Footprints
24	1e-18	3.07473	0.305593	1.12322	1.09634	-1.02562	3.27205	1	25050	9	1102659	23	HMVEC-LLy_footprints.txt	HMVEC-LLy	blood_vessel	footprints	Footprints
24	1e-20	3.87171	0.222716	1.3537	1.11019	-0.822276	3.52967	1	25050	7	1102659	23	HMVEC-LLy_footprints.txt	HMVEC-LLy	blood_vessel	footprints	Footprints
25	0.01	1.22766	1.02213e-05	0.205114	0.0464853	0.114002	0.296225	570	31509	14738	1102659	24	HPAF_footprints.txt	HPAF	blood_vessel	footprints	Footprints
25	0.0001	1.3939	0.0383366	0.332108	0.160343	0.0178361	0.646379	47	31509	814	1102659	24	HPAF_footprints.txt	HPAF	blood_vessel	footprints	Footprints
25	1e-06	1.65308	0.0655097	0.502637	0.272911	-0.0322678	1.03754	15	31509	233	1102659	24	HPAF_footprints.txt	HPAF	blood_vessel	footprints	Footprints
25	1e-08	1.91982	0.0840517	0.652233	0.377527	-0.0877197	1.39219	8	31509	98	1102659	24	HPAF_footprints.txt	HPAF	blood_vessel	footprints	Footprints
25	1e-10	2.46225	0.0988989	0.901075	0.546035	-0.169153	1.9713	4	31509	36	1102659	24	HPAF_footprints.txt	HPAF	blood_vessel	footprints	Footprints
25	1e-12	5.00253	0.0169064	1.60994	0.673973	0.288956	2.93093	3	31509	17	1102659	24	HPAF_footprints.txt	HPAF	blood_vessel	footprints	Footprints
25	1e-14	4.28006	0.0754617	1.45397	0.817916	-0.149149	3.05708	2	31509	11	1102659	24	HPAF_footprints.txt	HPAF	blood_vessel	footprints	Footprints
25	1e-16	2.51026	0.400513	0.920388	1.09478	-1.22538	3.06616	1	31509	9	1102659	24	HPAF_footprints.txt	HPAF	blood_vessel	footprints	Footprints
25	1e-18	2.51026	0.400513	0.920388	1.09478	-1.22538	3.06616	1	31509	9	1102659	24	HPAF_footprints.txt	HPAF	blood_vessel	footprints	Footprints
25	1e-20	3.1065	0.306579	1.1335	1.10863	-1.03942	3.30641	1	31509	7	1102659	24	HPAF_footprints.txt	HPAF	blood_vessel	footprints	Footprints
26	0.01	1.20785	1.34931e-05	0.18884	0.043392	0.103792	0.273888	663	38054	14738	1102659	25	HPdLF_footprints.txt	HPdLF	epithelium	footprints	Footprints
26	0.0001	1.4256	0.0169737	0.354591	0.148533	0.063465	0.645716	54	38054	814	1102659	25	HPdLF_footprints.txt	HPdLF	epithelium	footprints	Footprints
26	1e-06	1.62061	0.061471	0.482802	0.25817	-0.0232115	0.988815	18	38054	233	1102659	25	HPdLF_footprints.txt	HPdLF	epithelium	footprints	Footprints
26	1e-08	1.65491	0.181964	0.503748	0.377415	-0.235986	1.24348	9	38054	98	1102659	25	HPdLF_footprints.txt	HPdLF	epithelium	footprints	Footprints
26	1e-10	2.13466	0.164594	0.758308	0.545629	-0.311126	1.82774	5	38054	36	1102659	25	HPdLF_footprints.txt	HPdLF	epithelium	footprints	Footprints
26	1e-12	2.4972	0.241254	0.91517	0.780956	-0.615504	2.44584	3	38054	17	1102659	25	HPdLF_footprints.txt	HPdLF	epithelium	footprints	Footprints
26	1e-14	1.55162	0.68205	0.439301	1.07234	-1.66248	2.54108	2	38054	11	1102659	25	HPdLF_footprints.txt	HPdLF	epithelium	footprints	Footprints
26	1e-16	2.12768e-07	0.992916	-15.3631	1730.27	-3406.68	3375.96	1	38054	9	1102659	25	HPdLF_footprints.txt	HPdLF	epithelium	footprints	Footprints
26	1e-18	2.12768e-07	0.992916	-15.3631	1730.27	-3406.68	3375.96	1	38054	9	1102659	25	HPdLF_footprints.txt	HPdLF	epithelium	footprints	Footprints
26	1e-20	2.74109e-07	0.992778	-15.1097	1669.32	-3286.97	3256.75	0	38054	7	1102659	25	HPdLF_footprints.txt	HPdLF	epithelium	footprints	Footprints
27	0.01	1.25188	7.16308e-07	0.224647	0.0453201	0.135819	0.313474	604	33041	14738	1102659	26	HPF_footprints.txt	HPF	lung	footprints	Footprints
27	0.0001	1.55852	0.00332435	0.443738	0.151135	0.147513	0.739962	54	33041	814	1102659	26	HPF_footprints.txt	HPF	lung	footprints	Footprints
27	1e-06	1.72056	0.0405972	0.542647	0.265013	0.0232206	1.06207	16	33041	233	1102659	26	HPF_footprints.txt	HPF	lung	footprints	Footprints
27	1e-08	1.86064	0.0996958	0.620921	0.377155	-0.118302	1.36014	8	33041	98	1102659	26	HPF_footprints.txt	HPF	lung	footprints	Footprints
27	1e-10	1.70908	0.384118	0.535954	0.615803	-0.671019	1.74293	3	33041	36	1102659	26	HPF_footprints.txt	HPF	lung	footprints	Footprints
27	1e-12	2.86039	0.178129	1.05096	0.78049	-0.478801	2.58072	2	33041	17	1102659	26	HPF_footprints.txt	HPF	lung	footprints	Footprints
27	1e-14	1.77186	0.593458	0.572028	1.07155	-1.52821	2.67227	1	33041	11	1102659	26	HPF_footprints.txt	HPF	lung	footprints	Footprints
27	1e-16	2.15959e-07	0.993385	-15.3482	1851.16	-3643.62	3612.92	0	33041	9	1102659	26	HPF_footprints.txt	HPF	lung	footprints	Footprints
27	1e-18	2.15959e-07	0.993385	-15.3482	1851.16	-3643.62	3612.92	0	33041	9	1102659	26	HPF_footprints.txt	HPF	lung	footprints	Footprints
27	1e-20	2.8012e-07	0.993248	-15.088	1783.04	-3509.84	3479.67	0	33041	7	1102659	26	HPF_footprints.txt	HPF	lung	footprints	Footprints
28	0.01	1.1319	0.00861697	0.123894	0.0471638	0.031453	0.216335	554	33911	14738	1102659	27	HRCEpiC_footprints.txt	HRCEpiC	epithelium	footprints	Footprints
28	0.0001	1.34821	0.0623298	0.298777	0.160293	-0.0153973	0.612951	46	33911	814	1102659	27	HRCEpiC_footprints.txt	HRCEpiC	epithelium	footprints	Footprints
28	1e-06	1.73607	0.0374414	0.551627	0.265088	0.0320538	1.0712	16	33911	233	1102659	27	HRCEpiC_footprints.txt	HRCEpiC	epithelium	footprints	Footprints
28	1e-08	1.89948	0.0890612	0.641582	0.377319	-0.0979631	1.38113	8	33911	98	1102659	27	HRCEpiC_footprints.txt	HRCEpiC	epithelium	footprints	Footprints
28	1e-10	2.43671	0.102515	0.890648	0.545479	-0.17849	1.95979	4	33911	36	1102659	27	HRCEpiC_footprints.txt	HRCEpiC	epithelium	footprints	Footprints
28	1e-12	4.73182	0.0206969	1.55431	0.671852	0.237479	2.87114	3	33911	17	1102659	27	HRCEpiC_footprints.txt	HRCEpiC	epithelium	footprints	Footprints
28	1e-14	1.75814	0.598615	0.564255	1.07193	-1.53672	2.66523	1	33911	11	1102659	27	HRCEpiC_footprints.txt	HRCEpiC	epithelium	footprints	Footprints
28	1e-16	2.126e-07	0.993349	-15.3639	1843.08	-3627.79	3597.06	0	33911	9	1102659	27	HRCEpiC_footprints.txt	HRCEpiC	epithelium	footprints	Footprints
28	1e-18	2.126e-07	0.993349	-15.3639	1843.08	-3627.79	3597.06	0	33911	9	1102659	27	HRCEpiC_footprints.txt	HRCEpiC	epithelium	footprints	Footprints
28	1e-20	2.6913e-07	0.993222	-15.1281	1780.91	-3505.72	3475.46	0	33911	7	1102659	27	HRCEpiC_footprints.txt	HRCEpiC	epithelium	footprints	Footprints
29	0.01	1.19322	1.09149e-05	0.176659	0.0401661	0.0979333	0.255384	784	46000	14738	1102659	28	HSMM_footprints.txt	HSMM	muscle	footprints	Footprints
29	0.0001	1.53846	0.00133507	0.430785	0.134271	0.167614	0.693955	71	46000	814	1102659	28	HSMM_footprints.txt	HSMM	muscle	footprints	Footprints
29	1e-06	2.011	0.00167641	0.698633	0.222334	0.262859	1.13441	25	46000	233	1102659	28	HSMM_footprints.txt	HSMM	muscle	footprints	Footprints
29	1e-08	2.68281	0.000967298	0.986866	0.299062	0.400704	1.57303	15	46000	98	1102659	28	HSMM_footprints.txt	HSMM	muscle	footprints	Footprints
29	1e-10	5.19244	5.53936e-05	1.6472	0.408571	0.846404	2.448	10	46000	36	1102659	28	HSMM_footprints.txt	HSMM	muscle	footprints	Footprints
29	1e-12	10.2576	4.39595e-05	2.32802	0.569809	1.2112	3.44485	7	46000	17	1102659	28	HSMM_footprints.txt	HSMM	muscle	footprints	Footprints
29	1e-14	8.71392	0.00157854	2.16492	0.685136	0.822056	3.50779	5	46000	11	1102659	28	HSMM_footprints.txt	HSMM	muscle	footprints	Footprints
29	1e-16	8.12793	0.00716901	2.09531	0.779246	0.567984	3.62263	4	46000	9	1102659	28	HSMM_footprints.txt	HSMM	muscle	footprints	Footprints
29	1e-18	8.12793	0.00716901	2.09531	0.779246	0.567984	3.62263	4	46000	9	1102659	28	HSMM_footprints.txt	HSMM	muscle	footprints	Footprints
29	1e-20	11.0052	0.00383599	2.39837	0.8295	0.772549	4.02419	3	46000	7	1102659	28	HSMM_footprints.txt	HSMM	muscle	footprints	Footprints
30	0.01	1.22491	4.62727e-06	0.20287	0.0442849	0.116071	0.289668	638	35037	14738	1102659	29	HVMF_footprints.txt	HVMF	connective	footprints	Footprints
30	0.0001	1.47426	0.0095213	0.388158	0.149709	0.094728	0.681588	57	35037	814	1102659	29	HVMF_footprints.txt	HVMF	connective	footprints	Footprints
30	1e-06	1.26261	0.422414	0.233181	0.290663	-0.336518	0.80288	14	35037	233	1102659	29	HVMF_footprints.txt	HVMF	connective	footprints	Footprints
30	1e-08	1.71813	0.15109	0.541234	0.376984	-0.197655	1.28012	9	35037	98	1102659	29	HVMF_footprints.txt	HVMF	connective	footprints	Footprints
30	1e-10	1.57282	0.461994	0.452868	0.61567	-0.753846	1.65958	4	35037	36	1102659	29	HVMF_footprints.txt	HVMF	connective	footprints	Footprints
30	1e-12	2.61331	0.218383	0.960618	0.780459	-0.56908	2.49032	3	35037	17	1102659	29	HVMF_footprints.txt	HVMF	connective	footprints	Footprints
30	1e-14	1.61095	0.65619	0.476826	1.07109	-1.6225	2.57616	2	35037	11	1102659	29	HVMF_footprints.txt	HVMF	connective	footprints	Footprints
30	1e-16	2.09635e-07	0.99315	-15.3779	1791.06	-3525.86	3495.11	1	35037	9	1102659	29	HVMF_footprints.txt	HVMF	connective	footprints	Footprints
30	1e-18	2.09635e-07	0.99315	-15.3779	1791.06	-3525.86	3495.11	1	35037	9	1102659	29	HVMF_footprints.txt	HVMF	connective	footprints	Footprints
30	1e-20	2.7219e-07	0.99301	-15.1168	1725.55	-3397.2	3366.97	1	35037	7	1102659	29	HVMF_footprints.txt	HVMF	connective	footprints	Footprints
31	0.01	1.24137	8.59633e-06	0.216215	0.0485901	0.120978	0.311451	520	28584	14738	1102659	30	IMR90_footprints.txt	IMR90	lung	footprints	Footprints
31	0.0001	1.48315	0.0161784	0.394165	0.163903	0.0729148	0.715415	45	28584	814	1102659	30	IMR90_footprints.txt	IMR90	lung	footprints	Footprints
31	1e-06	1.3228	0.373145	0.279751	0.314116	-0.335917	0.895419	12	28584	233	1102659	30	IMR90_footprints.txt	IMR90	lung	footprints	Footprints
31	1e-08	1.86476	0.119758	0.62313	0.400523	-0.161895	1.40816	8	28584	98	1102659	30	IMR90_footprints.txt	IMR90	lung	footprints	Footprints
31	1e-10	1.96873	0.27202	0.677388	0.616692	-0.531328	1.8861	4	28584	36	1102659	30	IMR90_footprints.txt	IMR90	lung	footprints	Footprints
31	1e-12	3.28056	0.128409	1.18802	0.78138	-0.343489	2.71952	3	28584	17	1102659	30	IMR90_footprints.txt	IMR90	lung	footprints	Footprints
31	1e-14	2.02516	0.51052	0.705649	1.07237	-1.3962	2.80749	2	28584	11	1102659	30	IMR90_footprints.txt	IMR90	lung	footprints	Footprints
31	1e-16	2.12419e-07	0.99385	-15.3647	1993.32	-3922.27	3891.54	1	28584	9	1102659	30	IMR90_footprints.txt	IMR90	lung	footprints	Footprints
31	1e-18	2.12419e-07	0.99385	-15.3647	1993.32	-3922.27	3891.54	1	28584	9	1102659	30	IMR90_footprints.txt	IMR90	lung	footprints	Footprints
31	1e-20	2.74403e-07	0.993725	-15.1087	1920.98	-3780.23	3750.01	1	28584	7	1102659	30	IMR90_footprints.txt	IMR90	lung	footprints	Footprints
32	0.01	1.26049	0.000268484	0.231501	0.0635302	0.106982	0.35602	289	14726	14738	1102659	31	K562_footprints.txt	K562	blood	footprints	Footprints
32	0.0001	1.21342	0.399215	0.193446	0.229466	-0.256308	0.6432	21	14726	814	1102659	31	K562_footprints.txt	K562	blood	footprints	Footprints
32	1e-06	0.791946	0.6462	-0.233263	0.508144	-1.22923	0.7627	4	14726	233	1102659	31	K562_footprints.txt	K562	blood	footprints	Footprints
32	1e-08	0.819028	0.781469	-0.199637	0.719659	-1.61017	1.2109	2	14726	98	1102659	31	K562_footprints.txt	K562	blood	footprints	Footprints
32	1e-10	8.59363e-07	0.982584	-13.9671	639.826	-1268.03	1240.09	0	14726	36	1102659	31	K562_footprints.txt	K562	blood	footprints	Footprints
32	1e-12	1.12073e-07	0.99541	-16.0041	2782.18	-5469.07	5437.06	0	14726	17	1102659	31	K562_footprints.txt	K562	blood	footprints	Footprints
32	1e-14	1.44417e-07	0.995492	-15.7506	2787.45	-5479.16	5447.66	0	14726	11	1102659	31	K562_footprints.txt	K562	blood	footprints	Footprints
32	1e-16	2.12931e-07	0.995488	-15.3623	2716.76	-5340.21	5309.49	0	14726	9	1102659	31	K562_footprints.txt	K562	blood	footprints	Footprints
32	1e-18	2.12931e-07	0.995488	-15.3623	2716.76	-5340.21	5309.49	0	14726	9	1102659	31	K562_footprints.txt	K562	blood	footprints	Footprints
32	1e-20	2.83755e-07	0.995378	-15.0752	2602.25	-5115.49	5085.34	0	14726	7	1102659	31	K562_footprints.txt	K562	blood	footprints	Footprints
33	0.01	1.26275	4.15689e-07	0.233296	0.046091	0.142957	0.323634	562	29850	14738	1102659	32	NB4_footprints.txt	NB4	blood	footprints	Footprints
33	0.0001	1.24679	0.188005	0.22057	0.167542	-0.107813	0.548952	43	29850	814	1102659	32	NB4_footprints.txt	NB4	blood	footprints	Footprints
33	1e-06	1.04471	0.893907	0.0437426	0.327999	-0.599136	0.686621	10	29850	233	1102659	32	NB4_footprints.txt	NB4	blood	footprints	Footprints
33	1e-08	0.866437	0.781241	-0.143366	0.516259	-1.15523	0.868502	4	29850	98	1102659	32	NB4_footprints.txt	NB4	blood	footprints	Footprints
33	1e-10	1.09293	0.904153	0.0888622	0.737954	-1.35753	1.53525	2	29850	36	1102659	32	NB4_footprints.txt	NB4	blood	footprints	Footprints
33	1e-12	1.33807	0.781821	0.291225	1.05156	-1.76983	2.35228	1	29850	17	1102659	32	NB4_footprints.txt	NB4	blood	footprints	Footprints
33	1e-14	1.82369	0.575503	0.600864	1.07304	-1.50229	2.70402	1	29850	11	1102659	32	NB4_footprints.txt	NB4	blood	footprints	Footprints
33	1e-16	2.61417	0.37998	0.960947	1.09455	-1.18438	3.10627	1	29850	9	1102659	32	NB4_footprints.txt	NB4	blood	footprints	Footprints
33	1e-18	2.61417	0.37998	0.960947	1.09455	-1.18438	3.10627	1	29850	9	1102659	32	NB4_footprints.txt	NB4	blood	footprints	Footprints
33	1e-20	3.32637	0.277776	1.20188	1.10739	-0.9686	3.37236	1	29850	7	1102659	32	NB4_footprints.txt	NB4	blood	footprints	Footprints
34	0.01	1.11545	0.0337824	0.109258	0.051472	0.00837242	0.210143	475	28699	14738	1102659	33	NH-A_footprints.txt	NH-A	nervous	footprints	Footprints
34	0.0001	1.18635	0.351511	0.170885	0.183419	-0.188617	0.530386	39	28699	814	1102659	33	NH-A_footprints.txt	NH-A	nervous	footprints	Footprints
34	1e-06	0.860962	0.699376	-0.149705	0.387672	-0.909542	0.610133	9	28699	233	1102659	33	NH-A_footprints.txt	NH-A	nervous	footprints	Footprints
34	1e-08	1.37487	0.494129	0.31836	0.465605	-0.594225	1.23095	7	28699	98	1102659	33	NH-A_footprints.txt	NH-A	nervous	footprints	Footprints
34	1e-10	2.11731	0.223182	0.750146	0.615828	-0.456876	1.95717	5	28699	36	1102659	33	NH-A_footprints.txt	NH-A	nervous	footprints	Footprints
34	1e-12	3.37379	0.118818	1.21604	0.779632	-0.312044	2.74411	4	28699	17	1102659	33	NH-A_footprints.txt	NH-A	nervous	footprints	Footprints
34	1e-14	2.11612	0.484055	0.749586	1.07115	-1.34987	2.84904	3	28699	11	1102659	33	NH-A_footprints.txt	NH-A	nervous	footprints	Footprints
34	1e-16	2.14569e-07	0.993895	-15.3546	2006.7	-3948.49	3917.78	2	28699	9	1102659	33	NH-A_footprints.txt	NH-A	nervous	footprints	Footprints
34	1e-18	2.14569e-07	0.993895	-15.3546	2006.7	-3948.49	3917.78	2	28699	9	1102659	33	NH-A_footprints.txt	NH-A	nervous	footprints	Footprints
34	1e-20	2.71479e-07	0.993782	-15.1194	1940.01	-3817.54	3787.3	1	28699	7	1102659	33	NH-A_footprints.txt	NH-A	nervous	footprints	Footprints
35	0.01	1.14607	0.00170582	0.136335	0.043458	0.0511578	0.221513	669	40030	14738	1102659	34	NHDF-Ad_footprints.txt	NHDF-Ad	skin	footprints	Footprints
35	0.0001	1.37476	0.0318848	0.318278	0.148322	0.0275659	0.608989	58	40030	814	1102659	34	NHDF-Ad_footprints.txt	NHDF-Ad	skin	footprints	Footprints
35	1e-06	1.15933	0.610845	0.147843	0.290534	-0.421603	0.717289	13	40030	233	1102659	34	NHDF-Ad_footprints.txt	NHDF-Ad	skin	footprints	Footprints
35	1e-08	0.951878	0.915588	-0.0493185	0.4653	-0.961306	0.862669	5	40030	98	1102659	34	NHDF-Ad_footprints.txt	NHDF-Ad	skin	footprints	Footprints
35	1e-10	1.47887	0.524861	0.391275	0.615337	-0.814786	1.59734	3	40030	36	1102659	34	NHDF-Ad_footprints.txt	NHDF-Ad	skin	footprints	Footprints
35	1e-12	1.06554	0.951731	0.0634781	1.04865	-1.99187	2.11882	1	40030	17	1102659	34	NHDF-Ad_footprints.txt	NHDF-Ad	skin	footprints	Footprints
35	1e-14	1.47911	0.714628	0.391442	1.07054	-1.70682	2.4897	1	40030	11	1102659	34	NHDF-Ad_footprints.txt	NHDF-Ad	skin	footprints	Footprints
35	1e-16	2.12669e-07	0.992747	-15.3635	1690.17	-3328.1	3297.37	0	40030	9	1102659	34	NHDF-Ad_footprints.txt	NHDF-Ad	skin	footprints	Footprints
35	1e-18	2.12669e-07	0.992747	-15.3635	1690.17	-3328.1	3297.37	0	40030	9	1102659	34	NHDF-Ad_footprints.txt	NHDF-Ad	skin	footprints	Footprints
35	1e-20	2.73e-07	0.99261	-15.1138	1631.75	-3213.34	3183.11	0	40030	7	1102659	34	NHDF-Ad_footprints.txt	NHDF-Ad	skin	footprints	Footprints
36	0.01	1.17359	0.000140974	0.160066	0.0420512	0.0776457	0.242487	694	42104	14738	1102659	35	NHDF-neo_footprints.txt	NHDF-neo	skin	footprints	Footprints
36	0.0001	1.54293	0.0018144	0.433685	0.139044	0.161158	0.706212	66	42104	814	1102659	35	NHDF-neo_footprints.txt	NHDF-neo	skin	footprints	Footprints
36	1e-06	1.38387	0.219395	0.324887	0.264536	-0.193604	0.843378	17	42104	233	1102659	35	NHDF-neo_footprints.txt	NHDF-neo	skin	footprints	Footprints
36	1e-08	1.73251	0.124618	0.549569	0.357868	-0.151852	1.25099	10	42104	98	1102659	35	NHDF-neo_footprints.txt	NHDF-neo	skin	footprints	Footprints
36	1e-10	1.95886	0.216858	0.672362	0.544455	-0.394769	1.73949	5	42104	36	1102659	35	NHDF-neo_footprints.txt	NHDF-neo	skin	footprints	Footprints
36	1e-12	2.27952	0.290249	0.823965	0.779107	-0.703085	2.35101	3	42104	17	1102659	35	NHDF-neo_footprints.txt	NHDF-neo	skin	footprints	Footprints
36	1e-14	1.41958	0.743434	0.350362	1.07043	-1.74768	2.4484	2	42104	11	1102659	35	NHDF-neo_footprints.txt	NHDF-neo	skin	footprints	Footprints
36	1e-16	2.15593e-07	0.992561	-15.3499	1646.28	-3242.06	3211.36	1	42104	9	1102659	35	NHDF-neo_footprints.txt	NHDF-neo	skin	footprints	Footprints
36	1e-18	2.15593e-07	0.992561	-15.3499	1646.28	-3242.06	3211.36	1	42104	9	1102659	35	NHDF-neo_footprints.txt	NHDF-neo	skin	footprints	Footprints
36	1e-20	2.77037e-07	0.992417	-15.0991	1588.64	-3128.84	3098.64	1	42104	7	1102659	35	NHDF-neo_footprints.txt	NHDF-neo	skin	footprints	Footprints
37	0.01	1.15792	0.00043487	0.146622	0.0416781	0.064933	0.228311	742	43853	14738	1102659	36	NHLF_footprints.txt	NHLF	lung	footprints	Footprints
37	0.0001	1.26323	0.115131	0.233673	0.148313	-0.0570197	0.524366	57	43853	814	1102659	36	NHLF_footprints.txt	NHLF	lung	footprints	Footprints
37	1e-06	0.889412	0.708583	-0.117195	0.313556	-0.731764	0.497375	12	43853	233	1102659	36	NHLF_footprints.txt	NHLF	lung	footprints	Footprints
37	1e-08	1.27251	0.546453	0.240989	0.399595	-0.542217	1.0242	8	43853	98	1102659	36	NHLF_footprints.txt	NHLF	lung	footprints	Footprints
37	1e-10	1.37088	0.608211	0.315451	0.615358	-0.890652	1.52155	4	43853	36	1102659	36	NHLF_footprints.txt	NHLF	lung	footprints	Footprints
37	1e-12	2.19187	0.314232	0.784753	0.779777	-0.743609	2.31312	3	43853	17	1102659	36	NHLF_footprints.txt	NHLF	lung	footprints	Footprints
37	1e-14	1.37079	0.768425	0.315387	1.07116	-1.78409	2.41486	2	43853	11	1102659	36	NHLF_footprints.txt	NHLF	lung	footprints	Footprints
37	1e-16	2.13139e-07	0.992421	-15.3613	1617.11	-3184.89	3154.17	1	43853	9	1102659	36	NHLF_footprints.txt	NHLF	lung	footprints	Footprints
37	1e-18	2.13139e-07	0.992421	-15.3613	1617.11	-3184.89	3154.17	1	43853	9	1102659	36	NHLF_footprints.txt	NHLF	lung	footprints	Footprints
37	1e-20	2.71262e-07	0.992279	-15.1202	1562.51	-3077.64	3047.4	1	43853	7	1102659	36	NHLF_footprints.txt	NHLF	lung	footprints	Footprints
38	0.01	1.03873	0.415722	0.0379991	0.0466896	-0.0535125	0.129511	588	37520	14738	1102659	37	SAEC_footprints.txt	SAEC	epithelium	footprints	Footprints
38	0.0001	1.11803	0.500822	0.111564	0.165723	-0.213252	0.436381	44	37520	814	1102659	37	SAEC_footprints.txt	SAEC	epithelium	footprints	Footprints
38	1e-06	1.12805	0.689782	0.120486	0.301856	-0.471152	0.712124	12	37520	233	1102659	37	SAEC_footprints.txt	SAEC	epithelium	footprints	Footprints
38	1e-08	1.00608	0.989619	0.00606329	0.46603	-0.907356	0.919482	5	37520	98	1102659	37	SAEC_footprints.txt	SAEC	epithelium	footprints	Footprints
38	1e-10	1.54206	0.482429	0.433117	0.616624	-0.775465	1.6417	3	37520	36	1102659	37	SAEC_footprints.txt	SAEC	epithelium	footprints	Footprints
38	1e-12	2.53567	0.233772	0.930457	0.781438	-0.601161	2.46207	2	37520	17	1102659	37	SAEC_footprints.txt	SAEC	epithelium	footprints	Footprints
38	1e-14	3.6931	0.109976	1.30647	0.81741	-0.295657	2.90859	2	37520	11	1102659	37	SAEC_footprints.txt	SAEC	epithelium	footprints	Footprints
38	1e-16	2.1173	0.493003	0.750141	1.09423	-1.39456	2.89484	1	37520	9	1102659	37	SAEC_footprints.txt	SAEC	epithelium	footprints	Footprints
38	1e-18	2.1173	0.493003	0.750141	1.09423	-1.39456	2.89484	1	37520	9	1102659	37	SAEC_footprints.txt	SAEC	epithelium	footprints	Footprints
38	1e-20	2.56255	0.395536	0.941003	1.10756	-1.22981	3.11181	1	37520	7	1102659	37	SAEC_footprints.txt	SAEC	epithelium	footprints	Footprints
39	0.01	1.12434	0.00157954	0.117201	0.0370928	0.0444987	0.189902	946	59139	14738	1102659	38	SKMC_footprints.txt	SKMC	muscle	footprints	Footprints
39	0.0001	1.10002	0.492597	0.0953257	0.138921	-0.17696	0.367612	62	59139	814	1102659	38	SKMC_footprints.txt	SKMC	muscle	footprints	Footprints
39	1e-06	1.13151	0.622577	0.123555	0.251025	-0.368454	0.615564	19	59139	233	1102659	38	SKMC_footprints.txt	SKMC	muscle	footprints	Footprints
39	1e-08	1.41432	0.31089	0.346646	0.342077	-0.323825	1.01712	11	59139	98	1102659	38	SKMC_footprints.txt	SKMC	muscle	footprints	Footprints
39	1e-10	1.84856	0.216893	0.614405	0.497561	-0.360816	1.58963	6	59139	36	1102659	38	SKMC_footprints.txt	SKMC	muscle	footprints	Footprints
39	1e-12	4.02859	0.0228913	1.39342	0.612425	0.193064	2.59377	5	59139	17	1102659	38	SKMC_footprints.txt	SKMC	muscle	footprints	Footprints
39	1e-14	4.19815	0.0463195	1.43464	0.720033	0.0233794	2.84591	4	59139	11	1102659	38	SKMC_footprints.txt	SKMC	muscle	footprints	Footprints
39	1e-16	3.28774	0.161542	1.1902	0.850201	-0.476193	2.85659	3	59139	9	1102659	38	SKMC_footprints.txt	SKMC	muscle	footprints	Footprints
39	1e-18	3.28774	0.161542	1.1902	0.850201	-0.476193	2.85659	3	59139	9	1102659	38	SKMC_footprints.txt	SKMC	muscle	footprints	Footprints
39	1e-20	4.13665	0.105636	1.41989	0.877488	-0.299992	3.13976	3	59139	7	1102659	38	SKMC_footprints.txt	SKMC	muscle	footprints	Footprints
40	0.01	1.27724	8.42349e-05	0.244702	0.0622331	0.122725	0.366679	294	15522	14738	1102659	39	SK-N-SH_RA_footprints.txt	SK-N-SH	brain	footprints	Footprints
40	0.0001	1.92917	0.000430119	0.657092	0.186627	0.291303	1.02288	32	15522	814	1102659	39	SK-N-SH_RA_footprints.txt	SK-N-SH	brain	footprints	Footprints
40	1e-06	1.19018	0.676886	0.174104	0.4178	-0.644784	0.992992	6	15522	233	1102659	39	SK-N-SH_RA_footprints.txt	SK-N-SH	brain	footprints	Footprints
40	1e-08	1.23592	0.720538	0.211814	0.59209	-0.948682	1.37231	3	15522	98	1102659	39	SK-N-SH_RA_footprints.txt	SK-N-SH	brain	footprints	Footprints
40	1e-10	1.0059	0.995405	0.00588749	1.02228	-1.99779	2.00956	1	15522	36	1102659	39	SK-N-SH_RA_footprints.txt	SK-N-SH	brain	footprints	Footprints
40	1e-12	1.18721e-07	0.995326	-15.9465	2722.05	-5351.17	5319.27	0	15522	17	1102659	39	SK-N-SH_RA_footprints.txt	SK-N-SH	brain	footprints	Footprints
40	1e-14	1.54527e-07	0.9954	-15.6829	2719.97	-5346.82	5315.46	0	15522	11	1102659	39	SK-N-SH_RA_footprints.txt	SK-N-SH	brain	footprints	Footprints
40	1e-16	2.29396e-07	0.995395	-15.2878	2648.84	-5207.02	5176.44	0	15522	9	1102659	39	SK-N-SH_RA_footprints.txt	SK-N-SH	brain	footprints	Footprints
40	1e-18	2.29396e-07	0.995395	-15.2878	2648.84	-5207.02	5176.44	0	15522	9	1102659	39	SK-N-SH_RA_footprints.txt	SK-N-SH	brain	footprints	Footprints
40	1e-20	3.10205e-07	0.995275	-14.986	2530.75	-4975.26	4945.29	0	15522	7	1102659	39	SK-N-SH_RA_footprints.txt	SK-N-SH	brain	footprints	Footprints
41	0.01	1.19904	0.00485953	0.18152	0.0644557	0.055187	0.307853	270	14509	14738	1102659	40	Th1_footprints.txt	Th1	blood	footprints	Footprints
41	0.0001	1.31547	0.211179	0.274193	0.219297	-0.155629	0.704015	24	14509	814	1102659	40	Th1_footprints.txt	Th1	blood	footprints	Footprints
41	1e-06	0.770712	0.608228	-0.26044	0.508071	-1.25626	0.73538	4	14509	233	1102659	40	Th1_footprints.txt	Th1	blood	footprints	Footprints
41	1e-08	0.788777	0.741528	-0.237272	0.719374	-1.64724	1.1727	2	14509	98	1102659	40	Th1_footprints.txt	Th1	blood	footprints	Footprints
41	1e-10	0.971283	0.977272	-0.0291375	1.02274	-2.03371	1.97543	1	14509	36	1102659	40	Th1_footprints.txt	Th1	blood	footprints	Footprints
41	1e-12	2.67157	0.352024	0.982665	1.05587	-1.08684	3.05217	1	14509	17	1102659	40	Th1_footprints.txt	Th1	blood	footprints	Footprints
41	1e-14	3.59468	0.235204	1.27945	1.07783	-0.833101	3.39201	1	14509	11	1102659	40	Th1_footprints.txt	Th1	blood	footprints	Footprints
41	1e-16	2.21726e-07	0.995468	-15.3218	2697.52	-5302.45	5271.81	0	14509	9	1102659	40	Th1_footprints.txt	Th1	blood	footprints	Footprints
41	1e-18	2.21726e-07	0.995468	-15.3218	2697.52	-5302.45	5271.81	0	14509	9	1102659	40	Th1_footprints.txt	Th1	blood	footprints	Footprints
41	1e-20	3.0804e-07	0.995349	-14.993	2571.94	-5056	5026.01	0	14509	7	1102659	40	Th1_footprints.txt	Th1	blood	footprints	Footprints
42	0.01	1.15192	7.03235e-10	0.141433	0.02294	0.0964709	0.186396	3022	191323	14738	1102659	41	A549-all.twopass.merge150.wgt10.zgt2.wig	A549	epithelium	hotspots	Hotspots
42	0.0001	1.49194	2.04969e-06	0.400076	0.0842537	0.234938	0.565213	235	191323	814	1102659	41	A549-all.twopass.merge150.wgt10.zgt2.wig	A549	epithelium	hotspots	Hotspots
42	1e-06	1.67221	0.000589312	0.514144	0.149613	0.220902	0.807387	75	191323	233	1102659	41	A549-all.twopass.merge150.wgt10.zgt2.wig	A549	epithelium	hotspots	Hotspots
42	1e-08	1.57992	0.0430419	0.457373	0.226053	0.0143099	0.900436	33	191323	98	1102659	41	A549-all.twopass.merge150.wgt10.zgt2.wig	A549	epithelium	hotspots	Hotspots
42	1e-10	1.56609	0.231504	0.448579	0.374911	-0.286247	1.18341	13	191323	36	1102659	41	A549-all.twopass.merge150.wgt10.zgt2.wig	A549	epithelium	hotspots	Hotspots
42	1e-12	1.94512	0.239094	0.665323	0.565148	-0.442367	1.77301	7	191323	17	1102659	41	A549-all.twopass.merge150.wgt10.zgt2.wig	A549	epithelium	hotspots	Hotspots
42	1e-14	4.23044	0.0433069	1.44231	0.713752	0.0433515	2.84126	7	191323	11	1102659	41	A549-all.twopass.merge150.wgt10.zgt2.wig	A549	epithelium	hotspots	Hotspots
42	1e-16	2.81617	0.179484	1.03538	0.771318	-0.476408	2.54716	5	191323	9	1102659	41	A549-all.twopass.merge150.wgt10.zgt2.wig	A549	epithelium	hotspots	Hotspots
42	1e-18	2.81617	0.179484	1.03538	0.771318	-0.476408	2.54716	5	191323	9	1102659	41	A549-all.twopass.merge150.wgt10.zgt2.wig	A549	epithelium	hotspots	Hotspots
42	1e-20	4.46531	0.0859377	1.49634	0.871369	-0.211545	3.20422	5	191323	7	1102659	41	A549-all.twopass.merge150.wgt10.zgt2.wig	A549	epithelium	hotspots	Hotspots
43	0.01	1.17497	1.42173e-12	0.161242	0.0227681	0.116617	0.205868	3004	186675	14738	1102659	42	Adult_Th0_AllReps.30000000.twopass.merge150.wgt10.zgt2.wig	Adult_CD4+	blood	hotspots	Hotspots
43	0.0001	1.3453	0.000514292	0.296619	0.0854023	0.129231	0.464008	213	186675	814	1102659	42	Adult_Th0_AllReps.30000000.twopass.merge150.wgt10.zgt2.wig	Adult_CD4+	blood	hotspots	Hotspots
43	1e-06	1.34116	0.0568922	0.293533	0.154155	-0.00861139	0.595677	63	186675	233	1102659	42	Adult_Th0_AllReps.30000000.twopass.merge150.wgt10.zgt2.wig	Adult_CD4+	blood	hotspots	Hotspots
43	1e-08	1.09634	0.701045	0.0919769	0.239579	-0.377597	0.561551	25	186675	98	1102659	42	Adult_Th0_AllReps.30000000.twopass.merge150.wgt10.zgt2.wig	Adult_CD4+	blood	hotspots	Hotspots
43	1e-10	1.03736	0.927006	0.0366782	0.400361	-0.748029	0.821385	9	186675	36	1102659	42	Adult_Th0_AllReps.30000000.twopass.merge150.wgt10.zgt2.wig	Adult_CD4+	blood	hotspots	Hotspots
43	1e-12	0.712722	0.610935	-0.338664	0.665692	-1.64342	0.966092	3	186675	17	1102659	42	Adult_Th0_AllReps.30000000.twopass.merge150.wgt10.zgt2.wig	Adult_CD4+	blood	hotspots	Hotspots
43	1e-14	1.10399	0.889771	0.0989297	0.713808	-1.30013	1.49799	3	186675	11	1102659	42	Adult_Th0_AllReps.30000000.twopass.merge150.wgt10.zgt2.wig	Adult_CD4+	blood	hotspots	Hotspots
43	1e-16	0.369464	0.358859	-0.995702	1.08519	-3.12267	1.13126	1	186675	9	1102659	42	Adult_Th0_AllReps.30000000.twopass.merge150.wgt10.zgt2.wig	Adult_CD4+	blood	hotspots	Hotspots
43	1e-18	0.369464	0.358859	-0.995702	1.08519	-3.12267	1.13126	1	186675	9	1102659	42	Adult_Th0_AllReps.30000000.twopass.merge150.wgt10.zgt2.wig	Adult_CD4+	blood	hotspots	Hotspots
43	1e-20	0.482454	0.50718	-0.72887	1.09896	-2.88284	1.4251	1	186675	7	1102659	42	Adult_Th0_AllReps.30000000.twopass.merge150.wgt10.zgt2.wig	Adult_CD4+	blood	hotspots	Hotspots
44	0.01	1.08089	0.00492682	0.0777889	0.0276654	0.0235648	0.132013	1881	121871	14738	1102659	43	AG04449-DS12319.twopass.merge150.wgt10.zgt2.wig	AG04449	skin	hotspots	Hotspots
44	0.0001	1.01247	0.907449	0.0123894	0.106569	-0.196486	0.221265	119	121871	814	1102659	43	AG04449-DS12319.twopass.merge150.wgt10.zgt2.wig	AG04449	skin	hotspots	Hotspots
44	1e-06	0.926132	0.699986	-0.0767381	0.199144	-0.467061	0.313584	33	121871	233	1102659	43	AG04449-DS12319.twopass.merge150.wgt10.zgt2.wig	AG04449	skin	hotspots	Hotspots
44	1e-08	0.915763	0.766894	-0.0879974	0.296848	-0.669819	0.493824	15	121871	98	1102659	43	AG04449-DS12319.twopass.merge150.wgt10.zgt2.wig	AG04449	skin	hotspots	Hotspots
44	1e-10	0.814764	0.679079	-0.204857	0.495158	-1.17537	0.765653	6	121871	36	1102659	43	AG04449-DS12319.twopass.merge150.wgt10.zgt2.wig	AG04449	skin	hotspots	Hotspots
44	1e-12	1.73504	0.366625	0.551032	0.61035	-0.645253	1.74732	5	121871	17	1102659	43	AG04449-DS12319.twopass.merge150.wgt10.zgt2.wig	AG04449	skin	hotspots	Hotspots
44	1e-14	1.01653	0.983866	0.0163903	0.810493	-1.57218	1.60496	3	121871	11	1102659	43	AG04449-DS12319.twopass.merge150.wgt10.zgt2.wig	AG04449	skin	hotspots	Hotspots
44	1e-16	1.94303e-07	0.987153	-15.4538	959.741	-1896.55	1865.64	1	121871	9	1102659	43	AG04449-DS12319.twopass.merge150.wgt10.zgt2.wig	AG04449	skin	hotspots	Hotspots
44	1e-18	1.94303e-07	0.987153	-15.4538	959.741	-1896.55	1865.64	1	121871	9	1102659	43	AG04449-DS12319.twopass.merge150.wgt10.zgt2.wig	AG04449	skin	hotspots	Hotspots
44	1e-20	2.52173e-07	0.98692	-15.1932	926.772	-1831.67	1801.28	0	121871	7	1102659	43	AG04449-DS12319.twopass.merge150.wgt10.zgt2.wig	AG04449	skin	hotspots	Hotspots
45	0.01	1.16669	2.27062e-08	0.154171	0.0275798	0.100115	0.208228	1852	113851	14738	1102659	44	AG04450-DS12270.twopass.merge150.wgt10.zgt2.wig	AG04450	lung	hotspots	Hotspots
45	0.0001	1.32091	0.00557924	0.278323	0.100422	0.0814959	0.475149	137	113851	814	1102659	44	AG04450-DS12270.twopass.merge150.wgt10.zgt2.wig	AG04450	lung	hotspots	Hotspots
45	1e-06	1.22579	0.273714	0.203585	0.185999	-0.160972	0.568142	39	113851	233	1102659	44	AG04450-DS12270.twopass.merge150.wgt10.zgt2.wig	AG04450	lung	hotspots	Hotspots
45	1e-08	1.05148	0.862019	0.0502006	0.288834	-0.515915	0.616316	17	113851	98	1102659	44	AG04450-DS12270.twopass.merge150.wgt10.zgt2.wig	AG04450	lung	hotspots	Hotspots
45	1e-10	1.32544	0.519335	0.281743	0.437238	-0.575243	1.13873	9	113851	36	1102659	44	AG04450-DS12270.twopass.merge150.wgt10.zgt2.wig	AG04450	lung	hotspots	Hotspots
45	1e-12	1.87195	0.304359	0.626982	0.61042	-0.569442	1.82341	6	113851	17	1102659	44	AG04450-DS12270.twopass.merge150.wgt10.zgt2.wig	AG04450	lung	hotspots	Hotspots
45	1e-14	1.09217	0.913353	0.0881645	0.810258	-1.49994	1.67627	4	113851	11	1102659	44	AG04450-DS12270.twopass.merge150.wgt10.zgt2.wig	AG04450	lung	hotspots	Hotspots
45	1e-16	1.99277e-07	0.987538	-15.4286	987.751	-1951.42	1920.56	2	113851	9	1102659	44	AG04450-DS12270.twopass.merge150.wgt10.zgt2.wig	AG04450	lung	hotspots	Hotspots
45	1e-18	1.99277e-07	0.987538	-15.4286	987.751	-1951.42	1920.56	2	113851	9	1102659	44	AG04450-DS12270.twopass.merge150.wgt10.zgt2.wig	AG04450	lung	hotspots	Hotspots
45	1e-20	2.60794e-07	0.987303	-15.1595	952.569	-1882.2	1851.88	1	113851	7	1102659	44	AG04450-DS12270.twopass.merge150.wgt10.zgt2.wig	AG04450	lung	hotspots	Hotspots
46	0.01	1.11219	8.4975e-05	0.106335	0.0270579	0.0533019	0.159369	1971	125359	14738	1102659	45	AG09309-DS12352.twopass.merge150.wgt10.zgt2.wig	AG09309	skin	hotspots	Hotspots
46	0.0001	1.02292	0.829044	0.02266	0.104942	-0.183027	0.228347	123	125359	814	1102659	45	AG09309-DS12352.twopass.merge150.wgt10.zgt2.wig	AG09309	skin	hotspots	Hotspots
46	1e-06	0.788525	0.251273	-0.237591	0.207094	-0.643496	0.168313	30	125359	233	1102659	45	AG09309-DS12352.twopass.merge150.wgt10.zgt2.wig	AG09309	skin	hotspots	Hotspots
46	1e-08	0.881108	0.66934	-0.126575	0.296392	-0.707504	0.454353	16	125359	98	1102659	45	AG09309-DS12352.twopass.merge150.wgt10.zgt2.wig	AG09309	skin	hotspots	Hotspots
46	1e-10	1.21335	0.657967	0.193388	0.436816	-0.662771	1.04955	9	125359	36	1102659	45	AG09309-DS12352.twopass.merge150.wgt10.zgt2.wig	AG09309	skin	hotspots	Hotspots
46	1e-12	2.40566	0.129818	0.877824	0.57949	-0.257978	2.01362	7	125359	17	1102659	45	AG09309-DS12352.twopass.merge150.wgt10.zgt2.wig	AG09309	skin	hotspots	Hotspots
46	1e-14	2.84372	0.124327	1.04511	0.68003	-0.287746	2.37797	6	125359	11	1102659	45	AG09309-DS12352.twopass.merge150.wgt10.zgt2.wig	AG09309	skin	hotspots	Hotspots
46	1e-16	1.37586	0.706094	0.31908	0.846126	-1.33933	1.97749	4	125359	9	1102659	45	AG09309-DS12352.twopass.merge150.wgt10.zgt2.wig	AG09309	skin	hotspots	Hotspots
46	1e-18	1.37586	0.706094	0.31908	0.846126	-1.33933	1.97749	4	125359	9	1102659	45	AG09309-DS12352.twopass.merge150.wgt10.zgt2.wig	AG09309	skin	hotspots	Hotspots
46	1e-20	1.77521	0.511366	0.573919	0.873929	-1.13898	2.28682	3	125359	7	1102659	45	AG09309-DS12352.twopass.merge150.wgt10.zgt2.wig	AG09309	skin	hotspots	Hotspots
47	0.01	1.1397	1.03583e-05	0.130763	0.0296545	0.0726403	0.188886	1549	96195	14738	1102659	46	AG09319-DS12291.twopass.merge150.wgt10.zgt2.wig	AG09319	gingival	hotspots	Hotspots
47	0.0001	1.27522	0.0235719	0.243115	0.107381	0.0326478	0.453582	117	96195	814	1102659	46	AG09319-DS12291.twopass.merge150.wgt10.zgt2.wig	AG09319	gingival	hotspots	Hotspots
47	1e-06	1.09487	0.657755	0.0906385	0.204594	-0.310367	0.491644	30	96195	233	1102659	46	AG09319-DS12291.twopass.merge150.wgt10.zgt2.wig	AG09319	gingival	hotspots	Hotspots
47	1e-08	1.16487	0.607334	0.152608	0.296971	-0.429455	0.734672	15	96195	98	1102659	46	AG09319-DS12291.twopass.merge150.wgt10.zgt2.wig	AG09319	gingival	hotspots	Hotspots
47	1e-10	1.30536	0.564414	0.266478	0.462396	-0.639819	1.17277	7	96195	36	1102659	46	AG09319-DS12291.twopass.merge150.wgt10.zgt2.wig	AG09319	gingival	hotspots	Hotspots
47	1e-12	2.29409	0.174696	0.830335	0.61177	-0.368734	2.0294	5	96195	17	1102659	46	AG09319-DS12291.twopass.merge150.wgt10.zgt2.wig	AG09319	gingival	hotspots	Hotspots
47	1e-14	1.32949	0.725633	0.284795	0.81152	-1.30578	1.87537	3	96195	11	1102659	46	AG09319-DS12291.twopass.merge150.wgt10.zgt2.wig	AG09319	gingival	hotspots	Hotspots
47	1e-16	2.04047e-07	0.988572	-15.4049	1075.46	-2123.32	2092.51	1	96195	9	1102659	46	AG09319-DS12291.twopass.merge150.wgt10.zgt2.wig	AG09319	gingival	hotspots	Hotspots
47	1e-18	2.04047e-07	0.988572	-15.4049	1075.46	-2123.32	2092.51	1	96195	9	1102659	46	AG09319-DS12291.twopass.merge150.wgt10.zgt2.wig	AG09319	gingival	hotspots	Hotspots
47	1e-20	2.67159e-07	0.988351	-15.1354	1036.68	-2047.03	2016.76	0	96195	7	1102659	46	AG09319-DS12291.twopass.merge150.wgt10.zgt2.wig	AG09319	gingival	hotspots	Hotspots
48	0.01	1.1503	6.10312e-07	0.140019	0.0280716	0.0849987	0.195039	1779	110132	14738	1102659	47	AG10803-DS12384.twopass.merge150.wgt10.zgt2.wig	AG10803	skin	hotspots	Hotspots
48	0.0001	1.23551	0.041283	0.21148	0.103632	0.00836066	0.414599	127	110132	814	1102659	47	AG10803-DS12384.twopass.merge150.wgt10.zgt2.wig	AG10803	skin	hotspots	Hotspots
48	1e-06	0.99028	0.961328	-0.00976768	0.20145	-0.404609	0.385074	31	110132	233	1102659	47	AG10803-DS12384.twopass.merge150.wgt10.zgt2.wig	AG10803	skin	hotspots	Hotspots
48	1e-08	0.92762	0.805542	-0.0751327	0.305193	-0.67331	0.523045	14	110132	98	1102659	47	AG10803-DS12384.twopass.merge150.wgt10.zgt2.wig	AG10803	skin	hotspots	Hotspots
48	1e-10	1.14552	0.768432	0.135857	0.46143	-0.768546	1.04026	7	110132	36	1102659	47	AG10803-DS12384.twopass.merge150.wgt10.zgt2.wig	AG10803	skin	hotspots	Hotspots
48	1e-12	1.31964	0.677418	0.277358	0.666743	-1.02946	1.58417	4	110132	17	1102659	47	AG10803-DS12384.twopass.merge150.wgt10.zgt2.wig	AG10803	skin	hotspots	Hotspots
48	1e-14	1.15493	0.858874	0.144036	0.810063	-1.44369	1.73176	3	110132	11	1102659	47	AG10803-DS12384.twopass.merge150.wgt10.zgt2.wig	AG10803	skin	hotspots	Hotspots
48	1e-16	2.02431e-07	0.987769	-15.4129	1005.45	-1986.1	1955.28	1	110132	9	1102659	47	AG10803-DS12384.twopass.merge150.wgt10.zgt2.wig	AG10803	skin	hotspots	Hotspots
48	1e-18	2.02431e-07	0.987769	-15.4129	1005.45	-1986.1	1955.28	1	110132	9	1102659	47	AG10803-DS12384.twopass.merge150.wgt10.zgt2.wig	AG10803	skin	hotspots	Hotspots
48	1e-20	2.64411e-07	0.987543	-15.1458	970.066	-1916.48	1886.18	0	110132	7	1102659	47	AG10803-DS12384.twopass.merge150.wgt10.zgt2.wig	AG10803	skin	hotspots	Hotspots
49	0.01	1.14037	1.06913e-06	0.131354	0.0269253	0.0785807	0.184128	1980	122813	14738	1102659	48	AoAF-DS13523.twopass.merge150.wgt10.zgt2.wig	AoAF	blood_vessel	hotspots	Hotspots
49	0.0001	1.24048	0.0301638	0.215497	0.0994021	0.0206689	0.410325	145	122813	814	1102659	48	AoAF-DS13523.twopass.merge150.wgt10.zgt2.wig	AoAF	blood_vessel	hotspots	Hotspots
49	1e-06	1.2366	0.239167	0.212369	0.180422	-0.141257	0.565995	42	122813	233	1102659	48	AoAF-DS13523.twopass.merge150.wgt10.zgt2.wig	AoAF	blood_vessel	hotspots	Hotspots
49	1e-08	1.21336	0.473131	0.193393	0.269577	-0.334978	0.721764	20	122813	98	1102659	48	AoAF-DS13523.twopass.merge150.wgt10.zgt2.wig	AoAF	blood_vessel	hotspots	Hotspots
49	1e-10	1.46303	0.362746	0.380512	0.418079	-0.438923	1.19995	10	122813	36	1102659	48	AoAF-DS13523.twopass.merge150.wgt10.zgt2.wig	AoAF	blood_vessel	hotspots	Hotspots
49	1e-12	2.46541	0.120121	0.90236	0.58057	-0.235558	2.04028	7	122813	17	1102659	48	AoAF-DS13523.twopass.merge150.wgt10.zgt2.wig	AoAF	blood_vessel	hotspots	Hotspots
49	1e-14	2.90309	0.117543	1.06578	0.680932	-0.268852	2.4004	6	122813	11	1102659	48	AoAF-DS13523.twopass.merge150.wgt10.zgt2.wig	AoAF	blood_vessel	hotspots	Hotspots
49	1e-16	1.41378	0.682624	0.34627	0.846864	-1.31358	2.00612	4	122813	9	1102659	48	AoAF-DS13523.twopass.merge150.wgt10.zgt2.wig	AoAF	blood_vessel	hotspots	Hotspots
49	1e-18	1.41378	0.682624	0.34627	0.846864	-1.31358	2.00612	4	122813	9	1102659	48	AoAF-DS13523.twopass.merge150.wgt10.zgt2.wig	AoAF	blood_vessel	hotspots	Hotspots
49	1e-20	1.84568	0.4835	0.61285	0.874646	-1.10146	2.32716	3	122813	7	1102659	48	AoAF-DS13523.twopass.merge150.wgt10.zgt2.wig	AoAF	blood_vessel	hotspots	Hotspots
50	0.01	1.16322	5.97654e-09	0.151189	0.0259891	0.100251	0.202128	2142	134816	14738	1102659	49	BE_2_C-DS14625.twopass.merge150.wgt10.zgt2.wig	BE2_C	brain	hotspots	Hotspots
50	0.0001	1.29831	0.00660148	0.261067	0.0961111	0.0726894	0.449445	154	134816	814	1102659	49	BE_2_C-DS14625.twopass.merge150.wgt10.zgt2.wig	BE2_C	brain	hotspots	Hotspots
50	1e-06	1.47011	0.0224299	0.385337	0.168785	0.0545188	0.716156	48	134816	233	1102659	49	BE_2_C-DS14625.twopass.merge150.wgt10.zgt2.wig	BE2_C	brain	hotspots	Hotspots
50	1e-08	1.78531	0.0163693	0.57959	0.241438	0.106372	1.05281	25	134816	98	1102659	49	BE_2_C-DS14625.twopass.merge150.wgt10.zgt2.wig	BE2_C	brain	hotspots	Hotspots
50	1e-10	1.90904	0.0985006	0.646601	0.391366	-0.120475	1.41368	10	134816	36	1102659	49	BE_2_C-DS14625.twopass.merge150.wgt10.zgt2.wig	BE2_C	brain	hotspots	Hotspots
50	1e-12	2.31123	0.147954	0.837778	0.579057	-0.297174	1.97273	5	134816	17	1102659	49	BE_2_C-DS14625.twopass.merge150.wgt10.zgt2.wig	BE2_C	brain	hotspots	Hotspots
50	1e-14	2.75728	0.13578	1.01424	0.679929	-0.318418	2.3469	4	134816	11	1102659	49	BE_2_C-DS14625.twopass.merge150.wgt10.zgt2.wig	BE2_C	brain	hotspots	Hotspots
50	1e-16	2.5776	0.221005	0.946857	0.773665	-0.569526	2.46324	3	134816	9	1102659	49	BE_2_C-DS14625.twopass.merge150.wgt10.zgt2.wig	BE2_C	brain	hotspots	Hotspots
50	1e-18	2.5776	0.221005	0.946857	0.773665	-0.569526	2.46324	3	134816	9	1102659	49	BE_2_C-DS14625.twopass.merge150.wgt10.zgt2.wig	BE2_C	brain	hotspots	Hotspots
50	1e-20	3.58427	0.121535	1.27655	0.824455	-0.339376	2.89249	3	134816	7	1102659	49	BE_2_C-DS14625.twopass.merge150.wgt10.zgt2.wig	BE2_C	brain	hotspots	Hotspots
51	0.01	1.0885	0.00254337	0.0848036	0.028098	0.0297315	0.139876	1814	116294	14738	1102659	50	BJ-DS10081.twopass.merge150.wgt10.zgt2.wig	BJ	skin	hotspots	Hotspots
51	0.0001	1.13518	0.226185	0.126795	0.104768	-0.0785508	0.332142	126	116294	814	1102659	50	BJ-DS10081.twopass.merge150.wgt10.zgt2.wig	BJ	skin	hotspots	Hotspots
51	1e-06	0.830881	0.378587	-0.185269	0.210413	-0.597679	0.227141	29	116294	233	1102659	50	BJ-DS10081.twopass.merge150.wgt10.zgt2.wig	BJ	skin	hotspots	Hotspots
51	1e-08	0.805715	0.493634	-0.216025	0.315577	-0.834555	0.402505	14	116294	98	1102659	50	BJ-DS10081.twopass.merge150.wgt10.zgt2.wig	BJ	skin	hotspots	Hotspots
51	1e-10	0.867624	0.774272	-0.141997	0.495122	-1.11244	0.828442	7	116294	36	1102659	50	BJ-DS10081.twopass.merge150.wgt10.zgt2.wig	BJ	skin	hotspots	Hotspots
51	1e-12	1.85615	0.311214	0.618504	0.610761	-0.578588	1.8156	6	116294	17	1102659	50	BJ-DS10081.twopass.merge150.wgt10.zgt2.wig	BJ	skin	hotspots	Hotspots
51	1e-14	1.08611	0.918878	0.0825988	0.811009	-1.50698	1.67218	4	116294	11	1102659	50	BJ-DS10081.twopass.merge150.wgt10.zgt2.wig	BJ	skin	hotspots	Hotspots
51	1e-16	1.98125e-07	0.987456	-15.4344	981.657	-1939.48	1908.61	2	116294	9	1102659	50	BJ-DS10081.twopass.merge150.wgt10.zgt2.wig	BJ	skin	hotspots	Hotspots
51	1e-18	1.98125e-07	0.987456	-15.4344	981.657	-1939.48	1908.61	2	116294	9	1102659	50	BJ-DS10081.twopass.merge150.wgt10.zgt2.wig	BJ	skin	hotspots	Hotspots
51	1e-20	2.56947e-07	0.987229	-15.1744	948.021	-1873.3	1842.95	1	116294	7	1102659	50	BJ-DS10081.twopass.merge150.wgt10.zgt2.wig	BJ	skin	hotspots	Hotspots
52	0.01	1.24047	6.76354e-16	0.215494	0.0266875	0.163187	0.267802	1897	110328	14738	1102659	51	CACO2-DS8235.twopass.merge150.wgt10.zgt2.wig	Caco-2	colon	hotspots	Hotspots
52	0.0001	1.42417	0.000278945	0.353589	0.0972972	0.162886	0.544291	143	110328	814	1102659	51	CACO2-DS8235.twopass.merge150.wgt10.zgt2.wig	Caco-2	colon	hotspots	Hotspots
52	1e-06	1.07271	0.712479	0.0701887	0.190457	-0.303106	0.443484	35	110328	233	1102659	51	CACO2-DS8235.twopass.merge150.wgt10.zgt2.wig	Caco-2	colon	hotspots	Hotspots
52	1e-08	0.624968	0.165089	-0.470055	0.338618	-1.13375	0.193636	11	110328	98	1102659	51	CACO2-DS8235.twopass.merge150.wgt10.zgt2.wig	Caco-2	colon	hotspots	Hotspots
52	1e-10	0.305388	0.10609	-1.18617	0.734008	-2.62483	0.252484	3	110328	36	1102659	51	CACO2-DS8235.twopass.merge150.wgt10.zgt2.wig	Caco-2	colon	hotspots	Hotspots
52	1e-12	0.366112	0.336889	-1.00482	1.04632	-3.05561	1.04598	2	110328	17	1102659	51	CACO2-DS8235.twopass.merge150.wgt10.zgt2.wig	Caco-2	colon	hotspots	Hotspots
52	1e-14	0.508119	0.525431	-0.677039	1.06621	-2.76681	1.41273	2	110328	11	1102659	51	CACO2-DS8235.twopass.merge150.wgt10.zgt2.wig	Caco-2	colon	hotspots	Hotspots
52	1e-16	2.36048e-07	0.987467	-15.2592	971.402	-1919.21	1888.69	1	110328	9	1102659	51	CACO2-DS8235.twopass.merge150.wgt10.zgt2.wig	Caco-2	colon	hotspots	Hotspots
52	1e-18	2.36048e-07	0.987467	-15.2592	971.402	-1919.21	1888.69	1	110328	9	1102659	51	CACO2-DS8235.twopass.merge150.wgt10.zgt2.wig	Caco-2	colon	hotspots	Hotspots
52	1e-20	3.28576e-07	0.987199	-14.9285	930.44	-1838.59	1808.73	1	110328	7	1102659	51	CACO2-DS8235.twopass.merge150.wgt10.zgt2.wig	Caco-2	colon	hotspots	Hotspots
53	0.01	1.22824	5.02076e-15	0.20558	0.0262675	0.154096	0.257064	2020	117252	14738	1102659	52	CD14-DS18065.hg19.twopass.merge150.wgt10.zgt2.wig	CD14+	blood	hotspots	Hotspots
53	0.0001	1.38184	0.000744211	0.323416	0.0958909	0.13547	0.511362	153	117252	814	1102659	52	CD14-DS18065.hg19.twopass.merge150.wgt10.zgt2.wig	CD14+	blood	hotspots	Hotspots
53	1e-06	1.39956	0.0513621	0.336156	0.172526	-0.00199403	0.674306	45	117252	233	1102659	52	CD14-DS18065.hg19.twopass.merge150.wgt10.zgt2.wig	CD14+	blood	hotspots	Hotspots
53	1e-08	1.07088	0.802789	0.0684811	0.274211	-0.468972	0.605934	17	117252	98	1102659	52	CD14-DS18065.hg19.twopass.merge150.wgt10.zgt2.wig	CD14+	blood	hotspots	Hotspots
53	1e-10	1.17384	0.712874	0.160279	0.435543	-0.693384	1.01394	7	117252	36	1102659	52	CD14-DS18065.hg19.twopass.merge150.wgt10.zgt2.wig	CD14+	blood	hotspots	Hotspots
53	1e-12	1.17234	0.811904	0.159006	0.668175	-1.15062	1.46863	3	117252	17	1102659	52	CD14-DS18065.hg19.twopass.merge150.wgt10.zgt2.wig	CD14+	blood	hotspots	Hotspots
53	1e-14	1.79386	0.414204	0.584371	0.715687	-0.818375	1.98712	3	117252	11	1102659	52	CD14-DS18065.hg19.twopass.merge150.wgt10.zgt2.wig	CD14+	blood	hotspots	Hotspots
53	1e-16	0.607941	0.64703	-0.497677	1.08689	-2.62797	1.63262	1	117252	9	1102659	52	CD14-DS18065.hg19.twopass.merge150.wgt10.zgt2.wig	CD14+	blood	hotspots	Hotspots
53	1e-18	0.607941	0.64703	-0.497677	1.08689	-2.62797	1.63262	1	117252	9	1102659	52	CD14-DS18065.hg19.twopass.merge150.wgt10.zgt2.wig	CD14+	blood	hotspots	Hotspots
53	1e-20	0.789122	0.829553	-0.236834	1.10015	-2.39313	1.91946	1	117252	7	1102659	52	CD14-DS18065.hg19.twopass.merge150.wgt10.zgt2.wig	CD14+	blood	hotspots	Hotspots
54	0.01	1.22267	1.95628e-14	0.201034	0.026267	0.14955	0.252517	2028	117125	14738	1102659	53	CD20-DS17541.hg19.twopass.merge150.wgt10.zgt2.wig	CD20+	blood	hotspots	Hotspots
54	0.0001	1.18017	0.0962741	0.165661	0.0996043	-0.0295634	0.360885	141	117125	814	1102659	53	CD20-DS17541.hg19.twopass.merge150.wgt10.zgt2.wig	CD20+	blood	hotspots	Hotspots
54	1e-06	1.36602	0.0714603	0.311899	0.173033	-0.0272455	0.651043	45	117125	233	1102659	53	CD20-DS17541.hg19.twopass.merge150.wgt10.zgt2.wig	CD20+	blood	hotspots	Hotspots
54	1e-08	1.28092	0.339989	0.247577	0.259464	-0.260972	0.756127	20	117125	98	1102659	53	CD20-DS17541.hg19.twopass.merge150.wgt10.zgt2.wig	CD20+	blood	hotspots	Hotspots
54	1e-10	1.61521	0.234532	0.479463	0.403328	-0.311061	1.26999	9	117125	36	1102659	53	CD20-DS17541.hg19.twopass.merge150.wgt10.zgt2.wig	CD20+	blood	hotspots	Hotspots
54	1e-12	3.47492	0.0294473	1.24557	0.572033	0.124386	2.36675	6	117125	17	1102659	53	CD20-DS17541.hg19.twopass.merge150.wgt10.zgt2.wig	CD20+	blood	hotspots	Hotspots
54	1e-14	7.38461	0.00531266	1.9994	0.717289	0.593512	3.40528	6	117125	11	1102659	53	CD20-DS17541.hg19.twopass.merge150.wgt10.zgt2.wig	CD20+	blood	hotspots	Hotspots
54	1e-16	5.09155	0.0354991	1.62758	0.774074	0.110398	3.14477	4	117125	9	1102659	53	CD20-DS17541.hg19.twopass.merge150.wgt10.zgt2.wig	CD20+	blood	hotspots	Hotspots
54	1e-18	5.09155	0.0354991	1.62758	0.774074	0.110398	3.14477	4	117125	9	1102659	53	CD20-DS17541.hg19.twopass.merge150.wgt10.zgt2.wig	CD20+	blood	hotspots	Hotspots
54	1e-20	8.21438	0.015794	2.10589	0.872493	0.395799	3.81597	4	117125	7	1102659	53	CD20-DS17541.hg19.twopass.merge150.wgt10.zgt2.wig	CD20+	blood	hotspots	Hotspots
55	0.01	1.23052	9.6657e-17	0.207435	0.0249656	0.158502	0.256368	2335	136302	14738	1102659	54	CD34-DS16814.hg19.twopass.merge150.wgt10.zgt2.wig	CD34+	blood	hotspots	Hotspots
55	0.0001	1.3807	0.000449809	0.322589	0.091932	0.142402	0.502775	173	136302	814	1102659	54	CD34-DS16814.hg19.twopass.merge150.wgt10.zgt2.wig	CD34+	blood	hotspots	Hotspots
55	1e-06	1.63271	0.00219019	0.490242	0.160045	0.176554	0.80393	57	136302	233	1102659	54	CD34-DS16814.hg19.twopass.merge150.wgt10.zgt2.wig	CD34+	blood	hotspots	Hotspots
55	1e-08	1.3464	0.22918	0.297432	0.24735	-0.187375	0.782239	23	136302	98	1102659	54	CD34-DS16814.hg19.twopass.merge150.wgt10.zgt2.wig	CD34+	blood	hotspots	Hotspots
55	1e-10	1.64535	0.202917	0.497951	0.391076	-0.268558	1.26446	10	136302	36	1102659	54	CD34-DS16814.hg19.twopass.merge150.wgt10.zgt2.wig	CD34+	blood	hotspots	Hotspots
55	1e-12	2.11103	0.199605	0.747178	0.582514	-0.39455	1.8889	5	136302	17	1102659	54	CD34-DS16814.hg19.twopass.merge150.wgt10.zgt2.wig	CD34+	blood	hotspots	Hotspots
55	1e-14	2.45562	0.186799	0.89838	0.680535	-0.435469	2.23223	4	136302	11	1102659	54	CD34-DS16814.hg19.twopass.merge150.wgt10.zgt2.wig	CD34+	blood	hotspots	Hotspots
55	1e-16	1.25119	0.791029	0.224092	0.845712	-1.4335	1.88169	2	136302	9	1102659	54	CD34-DS16814.hg19.twopass.merge150.wgt10.zgt2.wig	CD34+	blood	hotspots	Hotspots
55	1e-18	1.25119	0.791029	0.224092	0.845712	-1.4335	1.88169	2	136302	9	1102659	54	CD34-DS16814.hg19.twopass.merge150.wgt10.zgt2.wig	CD34+	blood	hotspots	Hotspots
55	1e-20	1.68847	0.548322	0.523824	0.872638	-1.18655	2.23419	2	136302	7	1102659	54	CD34-DS16814.hg19.twopass.merge150.wgt10.zgt2.wig	CD34+	blood	hotspots	Hotspots
56	0.01	1.16081	9.7424e-08	0.149114	0.0279687	0.0942956	0.203933	1751	105865	14738	1102659	55	CMK-DS12393.twopass.merge150.wgt10.zgt2.wig	CMK	blood	hotspots	Hotspots
56	0.0001	1.13618	0.225824	0.127674	0.105412	-0.0789341	0.334282	122	105865	814	1102659	55	CMK-DS12393.twopass.merge150.wgt10.zgt2.wig	CMK	blood	hotspots	Hotspots
56	1e-06	0.874915	0.519151	-0.133628	0.207286	-0.539909	0.272653	28	105865	233	1102659	55	CMK-DS12393.twopass.merge150.wgt10.zgt2.wig	CMK	blood	hotspots	Hotspots
56	1e-08	0.716179	0.30717	-0.333826	0.326902	-0.974554	0.306903	11	105865	98	1102659	55	CMK-DS12393.twopass.merge150.wgt10.zgt2.wig	CMK	blood	hotspots	Hotspots
56	1e-10	0.472189	0.220723	-0.750376	0.612748	-1.95136	0.45061	3	105865	36	1102659	55	CMK-DS12393.twopass.merge150.wgt10.zgt2.wig	CMK	blood	hotspots	Hotspots
56	1e-12	0.357623	0.326433	-1.02828	1.04785	-3.08205	1.0255	1	105865	17	1102659	55	CMK-DS12393.twopass.merge150.wgt10.zgt2.wig	CMK	blood	hotspots	Hotspots
56	1e-14	0.493273	0.508342	-0.706692	1.06844	-2.80084	1.38746	1	105865	11	1102659	55	CMK-DS12393.twopass.merge150.wgt10.zgt2.wig	CMK	blood	hotspots	Hotspots
56	1e-16	0.687699	0.731034	-0.374404	1.08917	-2.50918	1.76037	1	105865	9	1102659	55	CMK-DS12393.twopass.merge150.wgt10.zgt2.wig	CMK	blood	hotspots	Hotspots
56	1e-18	0.687699	0.731034	-0.374404	1.08917	-2.50918	1.76037	1	105865	9	1102659	55	CMK-DS12393.twopass.merge150.wgt10.zgt2.wig	CMK	blood	hotspots	Hotspots
56	1e-20	0.888992	0.914979	-0.117666	1.10215	-2.27788	2.04254	1	105865	7	1102659	55	CMK-DS12393.twopass.merge150.wgt10.zgt2.wig	CMK	blood	hotspots	Hotspots
57	0.01	1.18854	1.23943e-12	0.172724	0.0243243	0.125049	0.2204	2496	153576	14738	1102659	56	E_myoblast_AllReps.30000000.twopass.merge150.wgt10.zgt2.wig	E_myoblast	muscle	hotspots	Hotspots
57	0.0001	1.54447	7.43149e-07	0.434679	0.0878187	0.262555	0.606804	200	153576	814	1102659	56	E_myoblast_AllReps.30000000.twopass.merge150.wgt10.zgt2.wig	E_myoblast	muscle	hotspots	Hotspots
[truncated: 9,506 more rows]
